# Supplementary material for: Cell Painting in activated cells illuminates phenotypic dark space and uncovers novel drug mechanisms of action
Source: Research Square preprint supplement (doi:10.21203/rs.3.rs-6734784/v1), 2025-06-23
Supplement: Supplementary file 1 [file 1ab6b9f87f95a23386b16360.docx]

Supp. Table 1: SelleckChem compounds used in a cell line/stain set pilot screen.

| Compound | HighScoring Class |  | Compound | MedScoring Class |
| --- | --- | --- | --- | --- |
| DCC-2036 (Rebastinib) | ABL |  | CCT128930 | Akt |
| GNF-2 | ABL |  | GDC-0068 | Akt |
| GNF-5 | ABL |  | GSK690693 | Akt |
| GZD824 | ABL |  | MK-2206 2HCl | Akt |
| Imatinib Mesylate (STI571) | ABL |  | PF-04691502 | Akt |
| Ponatinib (AP24534) | ABL |  | TIC10 | Akt |
| Dexmedetomidine | Adrenergic.Receptor.agonist |  | ABT-263 (Navitoclax) | BCL |
| Epinephrine Bitartrate | Adrenergic.Receptor.agonist |  | ABT-737 | BCL |
| Isoprenaline HCl | Adrenergic.Receptor.agonist |  | AT101 | BCL |
| Mirabegron | Adrenergic.Receptor.agonist |  | Gossypol | BCL |
| Ritodrine HCl | Adrenergic.Receptor.agonist |  | HA14-1 | BCL |
| Tetrahydrozoline HCl | Adrenergic.Receptor.agonist |  | Obatoclax Mesylate (GX15-070) | BCL |
| CYC116 | Aurora.Kinase |  | AGI-5198 | Dehydrogenase |
| Danusertib (PHA-739358) | Aurora.Kinase |  | Azathioprine | Dehydrogenase |
| MK-5108 (VX-689) | Aurora.Kinase |  | CPI-613 | Dehydrogenase |
| MK-8745 | Aurora.Kinase |  | Gimeracil | Dehydrogenase |
| MLN8054 | Aurora.Kinase |  | MK-8245 | Dehydrogenase |
| PHA-680632 | Aurora.Kinase |  | Mycophenolate Mofetil | Dehydrogenase |
| Lornoxicam | COX |  | 3-Deazaneplanocin A (DZNeP) | Histone.Methyltransferase |
| Mesalamine | COX |  | Entacapone | Histone.Methyltransferase |
| Naproxen | COX |  | EPZ-6438 | Histone.Methyltransferase |
| Phenacetin | COX |  | EPZ5676 | Histone.Methyltransferase |
| Sulfasalazine | COX |  | MM-102 | Histone.Methyltransferase |
| Triflusal | COX |  | SGC 0946 | Histone.Methyltransferase |
| 1-Azakenpaullone | GSK-3 |  | Asiatic Acid | p38.MAPK |
| AR-A014418 | GSK-3 |  | LY2228820 | p38.MAPK |
| AZD1080 | GSK-3 |  | PH-797804 | p38.MAPK |
| AZD2858 | GSK-3 |  | SB202190 (FHPI) | p38.MAPK |
| BIO | GSK-3 |  | SB203580 | p38.MAPK |
| CHIR-99021 (CT99021) HCl | GSK-3 |  | Skepinone-L | p38.MAPK |
| Azacyclonol | Histamine.Receptor |  | AG-14361 | PARP |
| Azatadine dimaleate | Histamine.Receptor |  | AZD2461 | PARP |
| Bepotastine Besilate | Histamine.Receptor |  | Iniparib (BSI-201) | PARP |
| Betahistine 2HCl | Histamine.Receptor |  | INO-1001 | PARP |
| Brompheniramine hydrogen maleate | Histamine.Receptor |  | ME0328 | PARP |
| Clemastine Fumarate | Histamine.Receptor |  | Olaparib (AZD2281; Ku-0059436) | PARP |
| 17-AAG (Tanespimycin) | HSP |  | Ciprofibrate | PPAR |
| AT13387 | HSP |  | GW9662 | PPAR |
| AUY922 (NVP-AUY922) | HSP |  | Rosiglitazone | PPAR |
| CH5138303 | HSP |  | Rosiglitazone HCl | PPAR |
| Ganetespib (STA-9090) | HSP |  | Rosiglitazone maleate | PPAR |
| HSP990 (NVP-HSP990) | HSP |  | T0070907 | PPAR |
| CYT997 (Lexibulin) | Microtubule.Associated |  | Clopamide | Sodium.Channel |
| Docetaxel | Microtubule.Associated |  | Dibucaine HCl | Sodium.Channel |
| Epothilone A | Microtubule.Associated |  | Ibutilide Fumarate | Sodium.Channel |
| Epothilone B (EPO906; Patupilone) | Microtubule.Associated |  | Oxcarbazepine | Sodium.Channel |
| Nocodazole | Microtubule.Associated |  | Phenytoin sodium | Sodium.Channel |
| Paclitaxel | Microtubule.Associated |  | Procaine HCl | Sodium.Channel |
| Cilazapril Monohydrate | RAAS |  | FH535 | Wnt.beta-catenin |
| Clinofibrate | RAAS |  | IWP-2 | Wnt.beta-catenin |
| Enalapril Maleate | RAAS |  | IWP-L6 | Wnt.beta-catenin |
| Moexipril HCl | RAAS |  |
| Olmesartan Medoxomil | RAAS |  |
| Quinapril HCl | RAAS |  |
| Ki8751 | VEGFR.KIT.PDGFR |  |
| KRN 633 | VEGFR.KIT.PDGFR |  |
| Pazopanib | VEGFR.KIT.PDGFR |  |
| Regorafenib (BAY 73-4506) | VEGFR.KIT.PDGFR |  |
| Telatinib | VEGFR.KIT.PDGFR |  |
| Tivozanib (AV-951) | VEGFR.KIT.PDGFR |  |

Supp. Table 2: Positive controls used in 10μM TargetMol screen

| Name | Supplier | Cat # |
| --- | --- | --- |
| AMG 900 | Cayman Chemical Company | 19176-1 |
| NVS-PAK1-1 | Cayman Chemical Company | 19964-5 |
| Alrestatin | Cayman Chemical Company | 29888-5 |
| Daporinad (fk866, Apo866) | Fisher | 501362977 |
| TCS 7004, Tocris Bioscience | Fisher | 508810RD |
| Desametasone, C22H29FO5 | Fisher | MP21993506 |
| LY2109761 | Sigma | SML2051-5MG |
| Quinidine | Spectrum | TCI-Q0006-5G |

Supp. Table 3: List of stains used

| Name | Supplier | Cat # |
| --- | --- | --- |
| Hoechst 33342 | Life Technologies | H3570 |
| MitoTracker Deep Red FM | Invitrogen | M22426 |
| Glu7-PhalloidinTMR | (synthetized in house) |  |
| EdU |  |  |
| iNOS (D6B6S) Rabbit mAb | Cell Signaling Technologies | 13120S |
| GM130 mouse | Fisher | BDB610823 |
| alpha-tubulin-FITC antibody mouse monoclonal | Sigma | F2168 |
| Phospho histone H3 (Ser10) Recombinant Rabbit Monoclonal Antibody (9H12L10) | Invitrogen | 701258 |
| Chicken anti-Mouse IgG (H+L) Cross-Adsorbed Secondary Antibody Alexa Fluor 488 | Life Technologies | A21200 |
| Chicken anti-Rabbit IgG (H+L) Cross-Adsorbed Secondary Antibody Alexa Fluor 647 | Life Technologies | A21443 |
| SYTO14 | Fisher | S7576 |
| Concanavalin A, Alexa Fluor 488 Conjugate | Thermo Fisher Scientific | C11252 |
| Wheat Germ Agglutinin (WGA) Alexa Fluor 555 Conjugate | Thermo Fisher Scientific | W32464 |
| Mouse anti-GR G-5, RRID:AB_2687823 | Santa Cruz Biotech | sc-393232 |

Supp. Table 4: Stepwise staining methods

|  | CP Screen and Pilot (JUMP stains) | GR assay | Pilot (“classic” stains) | |
| --- | --- | --- | --- | --- |
| Live stain(s) | 500 nM MitoTracker Deep Red FM in complete media, 30 min  37°C 5% CO2 | Not done | | 20 μM EdU and 100 nM MitoTracker Deep Red FM in complete media, 1 h  37°C 5% CO2 |
| Fix | 4% formaldehyde, 6 min RT | 4% formaldehyde, 20 min RT | | |
| Wash | Twice in PBS | | | |
| Permeabilize and block | Not done | 0.1% Triton X-100, 1% BSA, 1 h RT | 0.5% Triton X-100, 2% bovine serum albumin in PBS, 0.5 h RT dark | |
| Wash | Not done | Twice in cold PBS | Twice in PBS | |
| Click reaction | Not done | | | 1 mg/mL TMR-azide, 4 mM CuSO4, 2 mg/mL sodium ascorbate in 100 mM Tris |
| Wash | Not done | | | Twice in PBS |
| Primary stain | 8.25 nM TMR-Phalloidin,  5 μg/ml Concanavalin A, 1 μg/ml Hoechst, 1.5 μg/ml WGA, 6 μM Syto14 in 0.1% Triton X-100, 1% BSA 17 min RT dark | mouse anti-GR  (and no primary controls)  in BSA PBS o/n 4 ℃ | 1:5,000 rabbit anti-histone H3 phospho-S10, 1:1,000 mouse anti-GM-130, 2% BSA in PBS o/n 4 ℃ | 1:5,000 mouse anti-tubulin ɑ, 2% BSA in PBS o/n 4 ℃ |
| Wash | Twice in PBS | | | |
| Secondary stain | Not done | 2 μM Hoechst, 7 nM TMR-phalloidin, 1:1,000 AF647-anti-rabbit, 1:1,000 AF488-anti-mouse, 2 h RT dark | | 2 μM Hoechst in 2% BSA in PBS 2 h RT dark |
| Wash | Not Done | Twice in cold PBS | Twice in PBS | |
| Mounting medium | 0.05% Na Az in PBS | | 0.1% Na Az in PBS | |

Supp. Table 5: Phenix imaging setup

|  | Excitation laser and emission filter wavelengths (nm) | Pilot with classic “cyto” stain set 1 | Pilot with classic “EdU” stain set 2 | Pilot with JUMP stain set and CP screen | GR assay |
| --- | --- | --- | --- | --- | --- |
| B1 | 405, 435-480 | 95% 120 ms | 95% 100 ms | n/a | 95% 100 ms |
| B2 | 405, 435-550 | n/a | n/a | 95% 160 ms | n/a |
| G1 | 488, 500-530 | n/a | n/a | 95% 160 ms | n/a |
| G2 | 488, 500-550 | 95% 500 ms | 95% 200 ms | n/a | 50% 100 ms |
| Y | 488, 515-550 | n/a | n/a | 95% 60 ms | n/a |
| R | 561, 570-630 | 95% 80 ms | 95% 20 ms | 95% 160 ms | 95% 80 ms |
| M | 640, 650-760 | 95% 400 ms | 95% 100 ms | 95% 40 ms (pilot) or 20 ms (screen) | 95% 400 ms |
| BF | Brightfield 650-760 nm | 95% 40 ms | 50%, 100 ms | 95% 40 ms | 50% 100 ms |
| Sequence of capture (camera1/camera2) | | B1/G2, R/M, BF | | G1, Y, R/M, B1/BF | B1/G2, R/M, BF |
