# Supplementary material for: Cell Painting in activated cells illuminates phenotypic dark space and uncovers novel drug mechanisms of action
Source: Research Square preprint supplement (doi:10.21203/rs.3.rs-6734784/v1), 2025-06-23
Supplement: Supplementary file 2 [file ceafc533958c97fa01403c45.xlsx]

## Sheet: HistDiff outputs
Compounds HistDiff scores for cell features – UMAP feature reduction Set (used to create Fig. 4A)			Compounds HistDiff scores for cell features – Co-linearity feature reduction Set (used to create Fig.2B,C; Fig. 3A, B,C,D; Supp.Fig.2A,B,C,D; Fig.4B)			Compounds HistDiff scores for all collected cell features			Annotations of Compounds
PMA	GoogleDrive		PMA	GoogleDrive		PMA	GoogleDrive		GoogleDrive	(reducedKey sheet)
noPMA	GoogleDrive		noPMA	GoogleDrive		noPMA	GoogleDrive
PMA+noPMA	GoogleDrive		PMA+noPMA	GoogleDrive		PMA+noPMA	GoogleDrive
Data Submission Guidelines

## Sheet: FIG 1
Figure 1 Source Data
Fig 1A Full Signatures		Fig 1C
Fig 1A PCA reduced data

## Sheet: FIG 3
Fig 3 Source Data
Fig 3A
Linear Classifier Bar Graph Source
Fig 3B
Full Signature CP Scores used for scatter plots
PMA
noPMA
Fig 3C Correlations
FeatRed
UMAP

## Sheet: FIG 4
Fig 4 Source Data
Fig 4A
Heatmap Files	Source Data
	Colinearity reduce Data
	PMA	GoogleDrive
	noPMA	GoogleDrive
Fig 4B
PMA CP Scores
noPMA CP Scores
Fig 4C
Colinearity feature reduced CP Scores
PMA
noPMA
Fig 4D		Note: concentrations were parsed out
Colinearity feature reduced CP Scores
PMA
noPMA
Fig 4E
Plate Summaries containing cell count for determining cytotoxicity in each plate	Drive directory
Source Data for Panel 3E IQR scores	Excel Sheet
Source Data for CP Scores using FDR Method	Excel Sheet

## Sheet: FIG 5
Fig 5 Source Data
Fig 5A
UMAP Feature Reduction DataSets
PMA+noPMA	GoogleDrive
Cytoscape session	GoogleDrive
Fig 5B
Heatmap of Entire Screen	Raw Data
	PMA	GoogleDrive
	noPMA	GoogleDrive
Fig 5D
Excel Sheet

## Sheet: Supp.Methods
Supplementary Methods
All Supporitng Method Scripts can be found here:
GitHub
entropy_comparison data
GitHub

## Sheet: TargetMol compounds
TargetMol compounds with original and GPT-4/manual curation columns
Plate	Row	Col	Volume(microliter)	Concentration(mM)	Solvent	CAS	ID	Name	Synonym	SMILES	Formula	MolWt	Pathways	Target	Receptor	Bioactivity	Reference	cid	synonyms	inchikey	molecule_chembl_id	pref_name	BINDING_DB	TTD	currentFoundTargets	GPT-4 Target	GPT-4 Acronym	GPT-4 citation	GPT-4 KEGG pathway	GPT-4 Functional Class	AL_CONSOLIDATED_LOOKUKP	TM_Targets1
M92241	A	3	50	10	DMSO	1073154-85-4	T1996	Defactinib	PF-04554878; VS-6063	CNC(=O)c1ccc(Nc2ncc(c(NCc3nccnc3N(C)S(=O)(=O)C)n2)C(F)(F)F)cc1	C20H21F3N8O3S	510.49	Angiogenesis; Cytoskeletal Signaling; Tyrosine Kinase/Adaptors	FAK	FAK	Defactinib is an orally bioavailable, small-molecule focal adhesion kinase (FAK) inhibitor with potential antiangiogenic and antineoplastic activities.	Kang Y, et al. J Natl Cancer Inst. 2013, 105(19), 1485-1495.	25117126	Defactinib; 1073154-85-4; PF-04554878; VS-6063; 1345713-71-4; Defactinib (VS-6063, PF-04554878); Defactinib [USAN:INN]; N-methyl-4-((4-(((3-(N-methylmethylsulfonamido)pyrazin-2-yl)methyl)amino)-5-(trifluoromethyl)pyrimidin-2-yl)amino)benzamide; N-methyl-4-[[4-[[3-[methyl(methylsulfonyl)amino]pyrazin-2-yl]methylamino]-5-(trifluoromethyl)pyrimidin-2-yl]amino]benzamide; UNII-53O87HA2QU; 53O87HA2QU; …	FWLMVFUGMHIOAA-UHFFFAOYSA-N	CHEMBL3137331	DEFACTINIB	Others	Others	FAK; Others; Others	focal adhesion kinase	FAK	https://pubchem.ncbi.nlm.nih.gov/compound/Defactinib	hsa04510	Kinase	FAK	FAK
M92241	A	4	50	10	DMSO	1083-57-4	T0442	Bucetin	3-Hydroxy-p-butyrophenetidide	CCOC1=CC=C(NC(=O)CC(C)O)C=C1	C12H17NO3	223.27	Others	Others	Others	Bucetin is a pharmaceutical drug that acts as an analgesic and antipyretic. Bucetin was withdrawn from use in 1986 due to renal toxicity.	Togei, K, et al. Journal of the National Y Institute, 79 (5): 1151â€“8.	14130	Bucetin; 1083-57-4; 3-Hydroxy-p-butyrophenetidine; Betadid; N-(4-Ethoxyphenyl)-3-hydroxybutanamide; 3-Hydroxy-p-butyrophenetidide; Butanamide, N-(4-ethoxyphenyl)-3-hydroxy-; Bucetinum; 3-Hydroxy-4-butyrophenetidide; 4'-Ethoxy-3-hydroxybutyranilide; p-BUTYROPHENETIDIDE, 3-HYDROXY-; (+)-Bucetin; (-)-Bucetin; Bucetin, (+)-; Bucetin, (-)-; Bucetina; Bucetine; Bucetine [INN-French]; Bucetinum [INN-Lat…	LIAWQASKBFCRNR-UHFFFAOYSA-N	CHEMBL1697856	BUCETIN	Others	Others	Others; Others; Others						Others	Others
M92241	A	5	50	10	DMSO	110448-33-4	T3050	ML-7 hydrochloride	ML-7 HCl	C1CNCCN(C1)S(=O)(=O)c1cccc2c1cccc2I.Cl	C15H18ClIN2O2S	452.74	Cell Cycle/Checkpoint; Chromatin/Epigenetic; Cytoskeletal Signaling; Metabolism; Stem Cells; Tyrosine Kinase/Adaptors	Myosin; PKA; PKC; Serine/threonin kinase; YAP	Myosin; YAP; PKA; PKC; MLCK	ML-7 Hcl is a cell-permeable, reversible, effective, ATP-competitive, and specific inhibitor of myosin light chain kinase (Ki: 300 nM); also inhibits smooth-muscle myosin light chain kinase, PKA, and PKC.	Cheng X, et al. Mol Med Rep. 2015, 12(3):4109-16.	9803932	110448-33-4; ML-7 HYDROCHLORIDE; 1-((5-Iodonaphthalen-1-yl)sulfonyl)-1,4-diazepane hydrochloride; ML-7 HCl; ML 7 hydrochloride; 1-(5-Iodonaphthalene-1-sulfonyl)-1H-hexahydro-1,4-diazepine hydrochloride; ML-7 (hydrochloride); 1-(5-iodonaphthalen-1-ylsulfonyl)-1,4-diazepane hydrochloride; Hexahydro-1-[(5-iodo-1-naphthalenyl)sulfonyl]-1H-1,4-diazepine hydrochloride; 1-(5-iodonaphthalen-1-yl)sulfonyl…	KDDALCDYHZIZMH-UHFFFAOYSA-N	CHEMBL1407012		Others	Others	Myosin; PKA; PKC; Serine/threonin kinase; YAP; Others; Others	Myosin light chain kinase	MLCK	Saitoh M, Ishikawa T, Matsushima S, Naka M, Hidaka H. "Selective inhibition of catalytic activity of smooth muscle myosin light chain kinase." J. Biol. Chem. 1987 Dec 15;262(35):17299-302.	hsa04670	Kinase	Myosin_light_chain_kinase	Myosin
M92241	A	6	50	10	DMSO	58473-74-8	T0413	Cinromide	trans-3-Bromo-N-ethylcinnamamide	CCNC(=O)/C=C/C1=CC(=CC=C1)Br	C11H12BrNO	254.12	Others	Others	Others	Cinromide is used as a novel anticonvulsant agent.	Fromm GH, et al. Epilepsia. 1983 Aug; 24(4):394-400.	688145	CINROMIDE; trans-3-Bromo-N-ethylcinnamamide; 58473-74-8; Vumide; (E)-m-Bromo-N-ethylcinnamamide; 3-(3-Bromophenyl)-N-ethylacrylamide; Cinromidum; Cinromida; Cinromide [USAN:INN]; Cinromidum [INN-Latin]; Cinromida [INN-Spanish]; (E)-3-(3-Bromophenyl)-N-ethylacrylamide; C11H12BrNO; 69449-19-0; 3-Bromo-N-ethylcinnamide; (E)-3-(3-bromophenyl)-N-ethylprop-2-enamide; NSC-335304; BRN 2257983; UNII-M197K…	LDCXGZCEMNMWIL-VOTSOKGWSA-N	CHEMBL93233	CINROMIDE	Others	Others	Others; Others; Others						Others	Others
M92241	A	7	50	10	DMSO	122892-31-3	T1552	Itopride hydrochloride	HSR803; Ganaton	C(=O)(c1cc(c(cc1)OC)OC)NCc1ccc(cc1)OCCN(C)C.Cl	C20H27ClN2O4	394.9	GPCR/G Protein; Neuroscience	AChR; Dopamine Receptor	AChE; Dopamine Receptor	Itopride hydrochloride is an AChE and D2DR inhibitor.	Choung RS, et al. Neurogastroenterol Motil. 2007, 19(3):180-7.	129791	itopride hydrochloride; 122892-31-3; ITOPRIDE HCl; Ganaton; Itopride (hydrochloride); HSR803; HSR-803; Hsr 803; UNII-2H9NV66W0I; N-(4-(2-(dimethylamino)ethoxy)benzyl)-3,4-dimethoxybenzamide hydrochloride; Benzamide, N-[[4-[2-(dimethylamino)ethoxy]phenyl]methyl]-3,4-dimethoxy-, hydrochloride (1:1); 2H9NV66W0I; DTXSID5046693; n-[4-(2-dimethylaminoethoxy)benzyl]-3,4-dimethoxybenzamide hcl; 122892-31…	ZTOUXLLIPWWHSR-UHFFFAOYSA-N	CHEMBL2139257		Others	Others	AChR; Dopamine Receptor; Others; Others	Dopamine D2 receptor antagonism and Acetylcholinesterase inhibition	D2R, AChE	Matsunaga Y, Kishi T, Iwata N. "Itopride hydrochloride for functional dyspepsia: systematic review and meta-analysis." Psychopharmacology (Berl). 2014 Feb;231(4):789-98. doi: 10.1007/s00213-013-3315-8. Epub 2013 Nov 20.	hsa04728 (Dopaminergic synapse), hsa00564 (Glycerophospholipid metabolism)	Enzyme Inhibitor, Receptor Antagonist	Dopamine	AChR
M92241	A	8	50	10	DMSO	6398-98-7	T0381	Amodiaquine hydrochloride	Amodiaquin dihydrochloride dihydrate; Amodiaquine dihydrochloride dihydrate	O.Cl.CCN(CC)Cc1c(O)ccc(Nc2c3ccc(Cl)cc3ncc2)c1.O.Cl	C20H28Cl3N3O3	464.82	Chromatin/Epigenetic; GPCR/G Protein; Immunology/Inflammation; Microbiology/virology; Neuroscience	Histamine Receptor; Histone Methyltransferase; Parasite	histamine N-methyl transferase; Parasite; Histone Methyltransferase	Amodiaquine Hydrochloride is the hydrochloride salt of amodiaquine, an orally active 4-aminoquinoline derivative with antimalarial and anti-inflammatory properties.	Yokoyama A, et al. Eur J Pharmacol. 2007, 558(1-3):179-84.	64646	Amodiaquin dihydrochloride dihydrate; 6398-98-7; Amodiaquine hydrochloride; Amodiaquine HCl; Amodiaquine dihydrochloride dihydrate; 4-((7-Chloroquinolin-4-yl)amino)-2-((diethylamino)methyl)phenol dihydrochloride dihydrate; Amodiaquin HCl hydrate; CAM-AQ 1; UNII-K6PW2S574L; K6PW2S574L; Amodiaquine hydrochloride [USP]; DTXSID3045568; Amodiaquin dihydrochlorid-2-wasser; 6398-98-7 (HCl hydrate); Amod…	YVNAYSHNIILOJS-UHFFFAOYSA-N	CHEMBL1357648	AMODIAQUINE HYDROCHLORIDE	Others	Others	Histamine Receptor; Histone Methyltransferase; Parasite; Others; Others	Plasmodium falciparum heme polymerase		O'Neill PM, Barton VE, Ward SA. "The molecular mechanism of action of artemisininâ€”the debate continues." Molecules 15, no. 3 (2010): 1705-1721.		enzyme	Antimalarial	Histamine Receptor
M92241	A	9	50	10	DMSO	181183-52-8	T2317	Almotriptan Malate	LAS 31416; PNU180638	c1c(cc2c(c1)[nH]cc2CCN(C)C)CS(=O)(=O)N1CCCC1.OC(=O)C(CC(=O)O)O	C17H25N3O2SÂ·C4H6O5	469.55	GPCR/G Protein; Neuroscience	5-HT Receptor	5-HT Receptor; 5-HT1B/1D	Almotriptan Malate, a selective 5-HT1B/1D receptor agonist, is used in the therapy of Migraine attacks in adults.	Dodick, D. (2003). A review of the clinical efficacy and tolerability of almotriptan in acute migraine.Â Expert Opinion On Pharmacotherapy,Â 4(7), 1157-1163. doi: 10.1517/14656566.4.7.1157	123607	Almotriptan malate; 181183-52-8; Almotriptan maleate; LAS 31416 D,L-malate acid; Almotriptan (malate); PNU 180638E; PNU-180638E; Almotriptan malate [USAN]; Almotriptan d,l-hydrogenmalate; UNII-PJP312605E; CHEBI:53781; LAS-31416 D,L-Malate acid; Almotriptan Malate(PNU180638); PJP312605E; 181183-52-8(Almotriptan Malate); LAS-31416-D,L-MALATE-ACID; N,N-dimethyl-2-(5-((pyrrolidin-1-ylsulfonyl)methyl)…	QHATUKWEVNMHRY-UHFFFAOYSA-N	CHEMBL1200521	ALMOTRIPTAN MALATE	Others	Others	5-HT Receptor; Others; Others	5-HT1B/1D receptor	5-HT	https://www.accessdata.fda.gov/drugsatfda_docs/label/2014/021014s016lbl.pdf	hsa04726	G protein-coupled receptor	5-HT	5-HT Receptor
M92241	A	10	50	10	DMSO	68767-14-6	T0463	Loxoprofen	Koloxo; Loxoprofene; Loxoprofeno	CC(C(=O)O)c1ccc(CC2CCCC2=O)cc1	C15H18O3	246.3	Immunology/Inflammation; Neuroscience	COX	COX	Loxoprofen is an anti-inflammatory non-steroidal medicine.	Kanda A, et al. Acta Oncol. 2003, 42(1):62-70.	3965	Loxoprofen; 68767-14-6; 2-(4-((2-Oxocyclopentyl)methyl)phenyl)propanoic acid; Loxoprofene; Loxoprofeno; Koloxo; sodium loxoprofen; Loxoprofen sodium; Loxoprofen [INN]; Loxoprofenum; 2-{4-[(2-oxocyclopentyl)methyl]phenyl}propanoic acid; Loxoprofene [French]; Loxoprofenum [Latin]; Loxoprofeno [Spanish]; 2-[4-[(2-oxocyclopentyl)methyl]phenyl]propanoic acid; Loxoprofen acid; Loxonin; MFCD00864331; UN…	YMBXTVYHTMGZDW-UHFFFAOYSA-N	CHEMBL19299	LOXOPROFEN	Others	Others	COX; Others; Others	Cyclooxygenase	COX	https://www.sciencedirect.com/topics/neuroscience/loxoprofen	hsa00590 (Arachidonic acid metabolism)	Enzyme	COX	COX
M92241	A	11	50	10	DMSO	194423-06-8	T2245	CL387785	CL 387785; CL-387785; WAY-EKI 785; EKI-785	CC#CC(=O)Nc1cc2c(cc1)ncnc2Nc1cc(ccc1)Br	C18H13BrN4O	381.23	Angiogenesis; JAK/STAT signaling; Tyrosine Kinase/Adaptors	EGFR	EGFR	CL-387785(EKI785; WAY-EKI 785) is an irreversible inhibitor of EGFRï¼ˆIC50ï¼š 370+/-120 pMï¼‰; is able to overcome resistance caused by the T790M mutation on a functional level.	Discafani CM, et al. Biochem Pharmacol. 1999, 57(8), 917-925.	2776	cl-387785; 194423-06-8; EKI-785; N-(4-((3-bromophenyl)amino)quinazolin-6-yl)but-2-ynamide; CL-387,785; N-[4-[(3-Bromophenyl)amino]-6-quinazolinyl]-2-butynamide; CL-387785 (EKI-785); EKB-785; WAY-EKI-785; CL 387785; CL-387785(EKI785; WAY-EKI 785); UNII-B4W27J1Z8B; N-[4-(3-bromoanilino)quinazolin-6-yl]but-2-ynamide; CHEMBL91867; B4W27J1Z8B; 2-Butynamide, N-(4-((3-bromophenyl)amino)-6-quinazolinyl)-…	BTYYWOYVBXILOJ-UHFFFAOYSA-N	CHEMBL91867		Others	Others	EGFR; Others; Others	Epidermal growth factor receptor	EGFR	Anido, J., Matar, P., Albanell, J., GuzmÃ¡n, M., Rojo, F., Arribas, J., Averbuch, S., & Baselga, J. (2003). ZD1839 (Iressa), an EGFR-selective tyrosine kinase inhibitor, up-regulates p27KIP1 and induces G1 arrest in gefitinib-sensitive cell lines. Clinical cancer research: an official journal of the American Association for Cancer Research, 9(4), 1367â€“1373.	hsa04012	Kinase	EGFR	EGFR
M92241	A	12	50	10	DMSO	138-52-3	T0443	Salicoside	D-(âˆ’)-Salicin; Salicin; Salicoside; Salicine	OC[C@H]1O[C@@H](Oc2ccccc2CO)[C@H](O)[C@@H](O)[C@@H]1O	C13H18O7	286.28	Immunology/Inflammation; Neuroscience	COX	COX	Salicin, a phenol Î²-glycoside produced from willow bark, shows anti-inflammatory functions.	Maclagan T, et al. Br Med J, 1876, 1(803), 627.	439503	salicin; 138-52-3; Salicoside; D-(-)-Salicin; Salicine; Salicyl alcohol glucoside; D(-)-Salicin; (2R,3S,4S,5R,6S)-2-(Hydroxymethyl)-6-(2-(hydroxymethyl)phenoxy)tetrahydro-2H-pyran-3,4,5-triol; 2-(Hydroxymethyl)phenyl beta-D-glucopyranoside; Saligenin beta-D-glucopyranoside; Saligenin-beta-D-glucopyranoside; D-Salicin; alpha-Hydroxy-o-tolyl beta-D-glucopyranoside; Salicinum; 2-(Hydroxymethyl)pheny…	NGFMICBWJRZIBI-UJPOAAIJSA-N	CHEMBL462997	SALICIN	Others	Others	COX; Others; Others						COX	COX
M92241	A	13	50	10	DMSO	30462-34-1	T3051	THEAFLAVINE-3-GALLATE		O[C@@H]1Cc2c(O)cc(O)cc2O[C@@H]1c1cc(O)c(O)c2c1cc(cc(O)c2=O)[C@H]1Oc2cc(O)cc(O)c2C[C@H]1OC(=O)c1cc(O)c(O)c(O)c1	C36H28O16	716.6	Others	Others	Others	Theaflavin-3-gallate can play a role in decreased intestinal cholesterol absorption via inhibition of micelle formation.Â Theaflavin-3-gallate has anticancer and apoptotic effects in non-small cell lung carcinoma, it acts as prooxidants and induce oxidative stress, with carcinoma cells more sensitive than normal fibroblasts.	Li D W , Meng L , Zhang K X , et al. Anticancer and apoptotic effects of theaflavin-3-gallate in non-small cell lung carcinoma[J]. Bangladesh Journal of Pharmacology, 2015, 10(4).	169167	THEAFLAVIN MONOGALLATES; THEAFLAVINE-3-GALLATE; Theaflavin monogallate A; S6469PF6TK; Benzoic acid, 3,4,5-trihydroxy-, 2-(1-(3,4-dihydro-3,5,7-trihydroxy-2H-1-benzopyran-2-yl)-3,4,6-trihydroxy-5-oxo-5H-benzocyclohepten-8-yl)-3,4-dihydro-5,7-dihydroxy-2H-1-benzopyran-3-yl ester, (2R-(2alpha(2R*,3R*),3alpha))-; Benzoic acid, 3,4,5-trihydroxy-, 2-[1-(3,4-dihydro-3,5,7-trihydroxy-2H-1-benzopyran-2-yl…	KMJPKUVSXFVQGZ-WQLSNUALSA-N	CHEMBL3039319	THEAFLAVIN MONOGALLATES	Others	Others	Others; Others; Others						Others	Others
M92241	A	14	50	10	DMSO	88495-63-0	T0433	Artesunate	WR-256283	C[C@@H]1CC[C@H]2[C@@H](C)[C@H](OC(=O)CCC(O)=O)O[C@@H]3O[C@@]4(C)CC[C@@H]1[C@@]23OO4	C19H28O8	384.42	Apoptosis; Cell Cycle/Checkpoint; JAK/STAT signaling; Microbiology/virology; Stem Cells	Ferroptosis; Parasite; STAT; Virus Protease	Ferroptosis; Parasite; Virus Protease; STAT	Artesunate is part of the artemisinin group of drugs that treat malaria. It is a semi-synthetic derivative of artemisinin that is water-soluble and may therefore be given by injection. It is on the World Health Organization's List of Essential Medicines.	Xu N, et al. Int J Med Sci. 2015, 12(6):524-529.	6917864	Artesunate; Artesunic acid; Arsumax; 88495-63-0; Plasmotrin; Qinghaozhi; Saphnate; Dihydroqinghasu hemsuccinate; Artesunatum; Zysunate; Arinate; Arsuamoon; Artesunato; Asumax; Gsunate Forte; cosunate; Artesunata; Plasmotrim; Cosinate; Artesunate [INN]; CHEBI:63918; .alpha.-artesunic acid; Armax 200; Dihydroqinghaosu hemisuccinate; Artesunate [USAN:INN:BAN]; artesunate amivas; Succinyl dihydroarte…	FIHJKUPKCHIPAT-AHIGJZGOSA-N	CHEMBL361497	ARTESUNATE	Others	Others	Ferroptosis; Parasite; STAT; Virus Protease; Others; Others	Plasmodium falciparum enzymes involved in the heme detoxification pathway		Efferth T, Kaina B. "Toxicities by antimalarial drugs and their effect on the selection of drug resistance malaria parasites." Mutation Research/Reviews in Mutation Research 592.1-2 (2005): 41-57.	map05144	enzyme	Antimalarial	Ferroptosis
M92241	A	15	50	10	DMSO	312917-14-9	T2234	SC202671	SC 202671; SC-202671; JNK Inhibitor IX; TCS JNK 5a; N-(3-Cyano-4,5,6,7-tetrahydrobenzo[b]thienyl-2-yl)-1-naphthalenecarboxamide	C1CCc2c(C1)c(c(s2)NC(=O)c1cccc2ccccc12)C#N	C20H16N2OS	332.42	Apoptosis; MAPK	Apoptosis; JNK	JNK2; JNK3; JNK; Apoptosis	TCS JNK 5a is an effective, specific inhibitor of JNK3(pIC50= 6.7), JNK2(pIC50=6.5).	Angell RM, et al. Bioorg Med Chem Lett. 2007, 17(5), 1296-1301.	766949	312917-14-9; TCS JNK 5a; JNK Inhibitor IX; N-(3-cyano-4,5,6,7-tetrahydrobenzo[b]thiophen-2-yl)-1-naphthamide; SC-202671; N-(3-cyano-4,5,6,7-tetrahydro-1-benzothiophen-2-yl)naphthalene-1-carboxamide; AC1LG8KT; BAS 01816608; TCS JNK 5a (JNK Inhibitor IX); GW620972X; N-(3-Cyano-4,5,6,7-tetrahydrobenzo[b]thienyl-2-yl)-1-naphthalenecarboxamide; SC 202671; TCS-JNK-5a; JNKInhibitorIX; MFCD01005305; D0L0…	WQGDQGAFSDMBLA-UHFFFAOYSA-N	CHEMBL233001	GW620972X	Others	Others	Apoptosis; JNK; Others; Others						Apoptosis_Autophagy	Apoptosis
M92241	A	16	50	10	DMSO	148-24-3	T0404	Hydroxyquinoline	8-Hydroxyquinoline; 8-Oxychinolin; 8-Quinolinol; Oxine	OC1=CC=CC2=C1N=CC=C2	C9H7NO	145.16	Microbiology/virology	Antibacterial; Antibiotic	Bacterial; Antibiotic	Oxyquinoline is a heterocyclic phenol and derivative of quinoline with antiseptic, disinfectant, and pesticide properties. It is used as a stabilizer for hydrogen peroxide, where it is sometimes added in cosmetic products.	Freitas LB, et al. Eur J Med Chem. 2014 Sep 12;84:595-604.	1923	8-HYDROXYQUINOLINE; quinolin-8-ol; 148-24-3; 8-quinolinol; Oxyquinoline; Oxine; Quinophenol; Oxychinolin; 8-Quinol; 8-Oxyquinoline; Phenopyridine; Bioquin; Oxybenzopyridine; Hydroxybenzopyridine; Oxin; 1-Azanaphthalene-8-ol; 8-Hydroxychinolin; Tumex; 8-Chinolinol; 8-OQ; 8-Hydroxy-chinolin; Fennosan H 30; 8-Oxychinolin; Fennosan; Oxyquinol; o-Oxychinolin; Usaf ek-794; HYDROXYQUINOLINE; Oxyquinolin…	MCJGNVYPOGVAJF-UHFFFAOYSA-N	CHEMBL310555	OXYQUINOLINE	Others	Others	Antibacterial; Antibiotic; Others; Others					Antibacterial	Antibacterial	Antibacterial
M92241	A	17	50	10	DMSO	313-67-7	T2801	Aristolochic Acid	Aristolochic acid A; Aristolochic Acid I; Aristolochin; Aristolochine; TR 1736	COc1cccc2c3c4c(OCO4)cc(C(=O)O)c3c(cc12)[N+](=O)[O-]	C17H11NO7	341.27	NF-ÎºB	NF-ÎºB	NF-ÎºB	Aristolochic acids are a compound of mutagenic, carcinogenic, and nephrotoxic compounds commonly found in the Birthwort (Aristolochiaceae) family of plants.	Ma L, et al. J Ethnopharmacol. 2015 Aug 22;172:430-5.	2236	Aristolochic acid; Aristolochic acid A; 313-67-7; Aristolochic acid I; Aristolochin; Tardolyt; Aristolochic acid-I; ARISTOLOCHINE; Birthwort; TR 1736; Aristolochiazaeure; NSC-50413; Aristolochic acid 1; 8-Methoxy-6-nitrophenanthro[3,4-d][1,3]dioxole-5-carboxylic acid; CCRIS 1544; C17H11NO7; NSC11926; EINECS 206-238-3; 3,4-Methylenedioxy-8-methoxy-10-nitro-1-phenanthrenecarboxylic acid; NSC 11926;…	BBFQZRXNYIEMAW-UHFFFAOYSA-N	CHEMBL93353	ARISTOLOCHIC ACID	Others	Others	NF-ÎºB; Others; Others	NF-ÎºB	NF-ÎºB	StiborovÃ¡ M, Frei E, Wiessler M, Schmeiser HH. "Formation of DNA adducts by the natural anticancer compound aristolochic acid in rats." Biochemical Pharmacology. 2001 Jan 1;61(1):107-15.	hsa04064	Transcription Factor	NFkB	NF-ÎºB
M92241	A	18	50	10	DMSO	964-52-3	T0394	Moxisylyte hydrochloride	Thymoxamine hydrochloride	Cl.CC(C)c1c(OCCN(C)C)cc(C)c(OC(=O)C)c1	C16H26ClNO3	315.84	GPCR/G Protein; Neuroscience	Adrenergic Receptor	Adrenergic Receptor	Moxisylyte hydrochloride is an alpha-adrenergic blocking agent that is used in Raynaud's disease.	Imagawa A, et al. Life Sci. 1989;44(9):619-23.	6420039	moxisylyte hydrochloride; 964-52-3; Thymoxamine hydrochloride; Moxisylyte (hydrochloride); Moxisylyte HCl; Moxisylyte hydrochoride; Arlitene; Vasoklin; 4-(2-(Dimethylamino)ethoxy)-5-isopropyl-2-methylphenyl acetate hydrochloride; MLS000069692; Moxisylyte hydrochloride [JAN]; Carlytene; Opilon; Thymoxamine hcl; NSC-170448; SMR000058476; WV 365; Phenol, 4-[2-(dimethylamino)ethoxy]-2-methyl-5-(1-met…	IPWGSXZCDPTDEH-UHFFFAOYSA-N	CHEMBL1256739	MOXISYLYTE HYDROCHLORIDE	Others	Others	Adrenergic Receptor; Others; Others	Adrenergic Receptor	AR	Chapple CR, Steers WD. "Clinical pharmacokinetics of tamsulosin hydrochloride." Clinical Pharmacokinetics. 1999;36(2):127-40.	hsa04080	G protein-coupled receptor	Adrenergic_Receptor	Adrenergic Receptor
M92241	A	19	50	10	DMSO	321674-73-1	T2380	BIBR 1532		C/C(=C\C(=O)Nc1ccccc1C(=O)O)/c1ccc2ccccc2c1	C21H17NO3	331.36	Apoptosis; DNA Damage/DNA Repair	Apoptosis; Telomerase	Apoptosis; Telomerase	BIBR 1532 is an effective, specific and non-competitive telomerase inhibitor (IC50: 100 nM, in a cell-free assay).	Pascolo E, et al. J Biol Chem. 2002, 277(18), 15566-15572.	9927531	BIBR 1532; 321674-73-1; BIBR1532; (E)-2-(3-(naphthalen-2-yl)but-2-enamido)benzoic acid; BIBR-1532; CHEMBL27323; 2-{[(2e)-3-(Naphthalen-2-Yl)but-2-Enoyl]amino}benzoic Acid; 2197129-84-1; 2-[[(E)-3-naphthalen-2-ylbut-2-enoyl]amino]benzoic Acid; 2-(3-Naphthalen-2-yl-but-2-enoylamino)-benzoic acid; MLS006011127; SCHEMBL16964998; CHEBI:94985; DTXSID70432975; EX-A381; PGFQXGLPJUCTOI-WYMLVPIESA-N; GLXC-…	PGFQXGLPJUCTOI-WYMLVPIESA-N	CHEMBL27323		Others	Others	Apoptosis; Telomerase; Others; Others	Telomerase	TERT	Pascolo E, Wenz C, Lingner J, Hauel N, Priepke H, Kauffmann I, Garin-Chesa P, Rettig WJ, Damm K, Schnapp A. "Mechanism of human telomerase inhibition by BIBR1532, a synthetic, non-nucleosidic drug candidate." Journal of Biological Chemistry. 2002 May 10;277(19):15566-72.	hsa05200	Enzyme Inhibitor	Telomerase	Apoptosis
M92241	A	20	50	10	DMSO	23142-01-0	T0464	Carbetapentane citrate	Pentoxyverine citrate	OC(=O)CC(O)(CC(=O)O)C(=O)O.CCN(CC)CCOCCOC(=O)C1(CCCC1)c1ccccc1	C20H31NO3Â·C6H8O7	525.59	Neuroscience	AChR	AChR	Pentoxyverine Citrate, an antitussive (cough suppressant), is frequently used for a cough related to illnesses like the common cold.	DÃ¶nmez OA, et al. Talanta, 2011, 83(5), 1601-1605.	90010	Carbetapentane citrate; Pentoxyverine citrate; 23142-01-0; Loucarbate; Toclase; Pentoxiverine citrate; Carbetapentane (citrate); Carbetapentane citrate salt; Toclase citrate; Carbetapentone citrate; Pentoxyverine hydrogen citrate; EINECS 245-449-5; UNII-4SH0MFJ5HJ; 4SH0MFJ5HJ; NSC-757833; Carbetapentane citrate [NF]; Ethanol, 2-(2-(diethylamino)ethoxy)-, 1-phenylcyclopentanecarboxylate (ester) ci…	AKJDEXBCRLOVTH-UHFFFAOYSA-N	CHEMBL1256696	CARBETAPENTANE CITRATE	Others	Others	AChR; Others; Others	AChR					AChR	AChR
M92241	A	21	50	10	DMSO	380315-80-0	T1919	Tenovin-1	Tenovin 1	CC(=O)NC1=CC=C(NC(=S)NC(=O)C2=CC=C(C=C2)C(C)(C)C)C=C1	C20H23N3O2S	369.48	Apoptosis; Autophagy; Chromatin/Epigenetic; DNA Damage/DNA Repair; Metabolism	Autophagy; Dehydrogenase; MDM-2/p53; Mdm2; p53; Sirtuin	MDM-2/p53; Dihydroorotate Dehydrogenase; Sirtuin; Autophagy; Mdm2; p53	Tenovin-1 inhibits protein-deacetylating activities of SirT1 and SirT2 and protects against MDM2-mediated p53 degradation, which involves ubiquitination.	Lain S, et al. Cancer Cell, 2008, 13(5), 454-463.	1013376	Tenovin-1; 380315-80-0; Tenovin 1; N-[(4-acetamidophenyl)carbamothioyl]-4-tert-butylbenzamide; N-((4-acetamidophenyl)carbamothioyl)-4-(tert-butyl)benzamide; BIQ6AID2B7; DTXSID1046920; NCGC00181351-01; N-[4-({[(4-tert-butylphenyl)formamido]methanethioyl}amino)phenyl]acetamide; Benzamide, N-(((4-(acetylamino)phenyl)amino)thioxomethyl)-4-(1,1-dimethylethyl)-; N -[[[4-(Acetylamino)phenyl]amino]thioxo…	WOWJIWFCOPZFGV-UHFFFAOYSA-N	CHEMBL1436543		Others	Others	Autophagy; Dehydrogenase; MDM-2/p53; Mdm2; p53; Sirtuin; Others; Others	Sirtuin 1 and Sirtuin 2	SIRT1/SIRT2	Lain S et al., "Discovery, in vivo activity, and mechanism of action of a small-molecule p53 activator." Cancer Cell. 2008 May;13(5):454-63. doi: 10.1016/j.ccr.2008.03.004.	map04110 (Cell cycle)	Deacetylase	Sirtuin	Autophagy
M92241	A	22	50	10	DMSO	76639-94-6	T0454	Florfenicol	Nuflor; Aquafen	C(=O)(C(Cl)Cl)N[C@@H]([C@@H](c1ccc(cc1)S(=O)(=O)C)O)CF	C12H14Cl2FNO4S	358.21	Others	Others	Others	Florfenicol is a fluorinated synthetic analog of thiamphenicol. In the United States, florfenicol is currently used to treat bovine respiratory disease (BRD) associated with Mannheimia (Pasteurella) haemolytica, Pasteurella multocida, and Haemophilus somnus, to treat bovine interdigital phlegmon associated with Fusobacterium necrophorum and Bacteroides melaninogenicus.	Liu W, et al. Plant Physiol Biochem, 2012, 60, 165-170.	114811	Florfenicol; 73231-34-2; Nuflor; (-)-Florfenicol; Sch-25298; 76639-94-6; Sch 25298; C12H14Cl2FNO4S; Nuflor gold; Florfenicol [USAN:INN:BAN]; 2,2-dichloro-N-[(1R,2S)-3-fluoro-1-hydroxy-1-(4-methylsulfonylphenyl)propan-2-yl]acetamide; 2,2-dichloro-N-[(1R,2S)-3-fluoro-1-hydroxy-1-(4-methanesulfonylphenyl)propan-2-yl]acetamide; DTXSID9045500; UNII-9J97307Y1H; CHEBI:87185; D-threo-2,2-Dichloro-N-(alph…	AYIRNRDRBQJXIF-NXEZZACHSA-N	CHEMBL1241590	FLORFENICOL	Others	Others	Others; Others; Others	bacterial ribosome		SchlÃ¼nzen F, et al. "Structural basis for the antibiotic activity of ketolides and azalides." Structure. 2003 Mar;11(3):329-38.	map03010 (Ribosome)	Antibiotic	Bacterial_Ribosome	Others
M92241	B	3	50	10	DMSO	91832-40-5	T0133	Cefdinir	CI-983; FK-482; PD 134393	Nc1nc(cs1)C(=N\O)\C(=O)N[C@H]1[C@H]2SCC(C=C)=C(N2C1=O)C(O)=O	C14H13N5O5S2	395.41	Metabolism; Microbiology&Virology; Microbiology/virology	Antibacterial; Antibiotic; MPO	Bacterial; Antibiotic; PBPs; MPO	Cefdinir is a semi-synthetic, broad-spectrum antibiotic in the third generation of the cephalosporin class, proven effective for common bacterial infections of the ear, sinus, throat and skin.	Labro MT, et al. J Immunol,1994, 152(5), 2447-2455.	6399253	cefdinir; E-Cefdinir; 178601-88-2; 91832-40-5; Cefdinir, E-; UNII-61G2M33IGF; (E)-Cefdinir; 61G2M33IGF; (6R,7R)-7-[[(2E)-2-(2-amino-1,3-thiazol-4-yl)-2-hydroxyiminoacetyl]amino]-3-ethenyl-8-oxo-5-thia-1-azabicyclo[4.2.0]oct-2-ene-2-carboxylic acid; 5-Thia-1-azabicyclo[4.2.0]oct-2-ene-2-carboxylic acid, 7-[[(2E)-2-(2-amino-4-thiazolyl)-2-(hydroxyimino)acetyl]amino]-3-ethenyl-8-oxo-, (6R,7R)-; FK-4…	RTXOFQZKPXMALH-RWFJUVPESA-N	CHEMBL3186517		Others	Others	Antibacterial; Antibiotic; MPO; Others; Others	Penicillin-binding proteins	PBPs	https://www.ncbi.nlm.nih.gov/pmc/articles/PMC88907/	hsa00550	Enzyme	Penicillin_Binding	Antibacterial
M92241	B	4	50	10	DMSO	73816-42-9	T0281	Meclocycline sulfosalicylate salt	Mecloderm; Meclutin; Meclan Cream	OC(=O)c1cc(ccc1O)S(O)(=O)=O.CN(C)[C@H]1[C@@H]2[C@@H](O)[C@@H]3C(=C)c4c(Cl)ccc(O)c4C(=O)C3=C(O)[C@]2(O)C(=O)C(C(N)=O)=C1O	C22H21ClN2O8Â·C7H6O6S	695.05	Microbiology/virology	Antibacterial; Antibiotic	antibiotic; Bacterial	Meclocycline (INN), a tetracycline antibiotic, is used topically (i.e. for skin infections) as it is totally insoluble in water and may damage kidney and liver if given systemically.	Grio R, et al. Minerva Ginecol. 1986 Mar;38(3):163-5.	54676538	Meclocycline sulfosalicylate; 73816-42-9; Meclocycline sulfosalicylate salt; Mecloderm; Meclan; Meclutin; Meclan Cream; Meclocycline 5-sulfosalicylate; Meclocycline (Sulfosalicylate Salt); Meclocycline sulfosalicylate [USAN]; EINECS 277-614-2; Meclocyline sulfosalicylate; UNII-46VZA7RX2B; NSC-757831; 46VZA7RX2B; DTXSID5045596; C22H21ClN2O8.C7H6O6S; SNX-1012; (4S,4aR,5S,5aR,12aS)-7-Chloro-4-(dimet…	WVJKUGVVYXCLFV-CCHMMTNSSA-N			Others	Others	Antibacterial; Antibiotic; Others; Others	30S ribosomal subunit		Chopra, I., & Roberts, M. (2001). Tetracycline antibiotics: mode of action, applications, molecular biology, and epidemiology of bacterial resistance. Microbiology and molecular biology reviews, 65(2), 232â€“260. https://doi.org/10.1128/MMBR.65.2.232-260.2001	map03010	Antibiotic	Bacterial_Ribosome	Antibacterial
M92241	B	5	50	10	DMSO	85650-52-8	T0137	Mirtazapine	6-Azamianserin; Org3770	CN1CCN2C(C1)c1ccccc1Cc1c2nccc1	C17H19N3	265.35	Endocrinology/Hormones; GPCR/G Protein; Immunology/Inflammation; Neuroscience	5-HT Receptor; Adrenergic Receptor; Dopamine Receptor; Histamine Receptor; Opioid Receptor	5-HT Receptor; Histamine Receptor; 5-HT; HT; Sert (Sodium-dependent); Adrenergic Receptor; DA transporter; Dopamine; Îº-opioid receptor	Mirtazapine is a tetracyclic antidepressant with a somewhat unique mechanism of action. Mirtazapine therapy can be associated with transient asymptomatic elevations in serum aminotransferase levels and has been linked to rare instances of clinically apparent acute liver injury.	Millan MJ, et al. Eur J Neurosci, 2000, 12(3), 1079-1095.	4205	mirtazapine; 85650-52-8; Remeron; 61337-67-5; 6-Azamianserin; Zispin; Mepirzepine; Remergil; Rexer; Promyrtil; Remergon; Norset; Mirtazepine; Avanza; Remeron SolTab; Mepirzapin; Mirtazipine; ORG 3770; Mirtazapina; Mirtazapinum; Mirtazapinum [INN-Latin]; Mirtazapina [INN-Spanish]; Mirtabene; Org-3770; 2-Methyl-1,2,3,4,10,14b-hexahydropyrazino[2,1-a]pyrido[2,3-c][2]benzazepine; Azamianserin; Mirtaz…	RONZAEMNMFQXRA-UHFFFAOYSA-N	CHEMBL654	MIRTAZAPINE	Others	Others	5-HT Receptor; Adrenergic Receptor; Dopamine Receptor; Histamine Receptor; Opioid Receptor; Others; Others	5-HT2 receptor	HTR2	Anttila SA, Leinonen EV. "A review of the pharmacological and clinical profile of mirtazapine." CNS Drug Reviews 7.3 (2001): 249-264.	hsa04080	G protein-coupled receptor	5-HT	5-HT Receptor
M92241	B	6	50	10	DMSO	81025-04-9	T0299	Lactitol monohydrate	D-Lactitol monohydrate	C([C@@H]1[C@@H]([C@@H]([C@H]([C@@H](O1)O[C@H]([C@@H](CO)O)[C@@H]([C@H](CO)O)O)O)O)O)O.O	C12H24O11Â·H2O	362.33	Others	Others	Others	Lactitol monohydrate is a disaccharide analog of lactulose. It has been widely used to treat constipation and hepatic encephalopathy.	Kanters JA, et al. Acta Crystallogr C. 1990 Dec 15;46 ( Pt 12):2408-11.	3067270	Lactitol monohydrate; 81025-04-9; D-Lactitol monohydrate; Lactitol (monohydrate); Lactitol hydrate; 4-O-beta-D-Galactopyranosyl-D-glucitol monohydrate; UNII-UH2K6W1Y64; UH2K6W1Y64; DTXSID6047028; C12H24O11.H2O; pizensy; Lactitol hydrate (JAN); (2S,3R,4R,5R)-4-[(2S,3R,4S,5R,6R)-3,4,5-trihydroxy-6-(hydroxymethyl)oxan-2-yl]oxyhexane-1,2,3,5,6-pentol;hydrate; LACTITOL HYDRATE [JAN]; D-Glucitol, 4-O-b…	LXMBXZRLTPSWCR-XBLONOLSSA-N	CHEMBL1200429		Others	Others	Others; Others; Others						Others	Others
M92241	B	7	50	10	DMSO	70797-11-4	T0138	Cefpiramide acid	Cefpiramido; Cefpiramidum	S1[C@H]2N(C(=O)[C@H]2NC(=O)[C@H](NC(=O)c2c(O)cc(nc2)C)c2ccc(O)cc2)C(=C(C1)CSc1n(nnn1)C)C(=O)O	C25H24N8O7S2	612.64	Microbiology/virology	Antibacterial	PBPs	Cefpiramide is a third-generation cephalosporin antibiotic.	Fass RJ, Helsel VL. Diagn Microbiol Infect Dis. 1986 Jan;4(1):77-81.	636405	cefpiramide; 70797-11-4; Cefpiramide acid; Cefpiramido; Cefpiramidum; WY-44635; UNII-P936YA152N; Cefpiramide [USAN:USP:INN]; WY-44,635; DTXSID6046630; CHEBI:59213; P936YA152N; NSC-759869; (7R)-7-[[(2R)-2-(4-hydroxyphenyl)-2-[(6-methyl-4-oxo-1H-pyridine-3-carbonyl)amino]acetyl]amino]-3-[(1-methyltetrazol-5-yl)sulfanylmethyl]-8-oxo-5-thia-1-azabicyclo[4.2.0]oct-2-ene-2-carboxylic acid; NCGC00167444…	PWAUCHMQEXVFJR-PMAPCBKXSA-N	CHEMBL1201204	CEFPIRAMIDE	Others	Others	Antibacterial; Others; Others	Penicillin-binding proteins (PBPs)	PBPs	Page, M. I., & Badarau, A. (2008). The mechanisms of catalysis by metallo Î²-lactamases. Bioinorganic Chemistry and Applications, 2008. https://www.hindawi.com/journals/bca/2008/576297/	hsa00550	Enzyme	Penicillin_Binding	Antibacterial
M92241	B	8	50	10	DMSO	1098-60-8	T0302	Triflupromazine hydrochloride	Fluopromazine hydrochloride; Flumazin; Fluorofen; Neoprin	Cl.CN(C)CCCN1c2ccccc2Sc2c1cc(cc2)C(F)(F)F	C18H20ClF3N2S	388.88	Autophagy; GPCR/G Protein; Neuroscience	5-HT Receptor; AChR; Autophagy; Dopamine Receptor	5-HT; mAChR; Dopamine; Dopamine Receptor; Autophagy	Triflupromazine hydrochloride, an antipsychotic medication, is Dopamine D1/D2 receptor antagonists.	Snyder S, et al. Arch Gen Psychiatry. 1974 Jul;31(1):58-61.	66069	Triflupromazine hydrochloride; 1098-60-8; Triflupromazine HCl; Flumazin; Fluorofen; Neoprin; Nivoman; Siquil; Triflupromazine (hydrochloride); Vesprin hydrochloride; Triflupromazine monohydrochloride; Trifluopromazine hydrochloride; Fluopromazine monohydrochloride; MC 4703; Triflupromazine hydrochloride [JAN]; EINECS 214-149-6; Trifluopromazine hydrochloride (VAN); NSC 14959; NSC 17473; NSC-14959…	FTNWXGFYRHWUKG-UHFFFAOYSA-N	CHEMBL1201102	TRIFLUPROMAZINE HYDROCHLORIDE	Others	Others	5-HT Receptor; AChR; Autophagy; Dopamine Receptor; Others; Others	Dopamine Receptor	DR	https://pubchem.ncbi.nlm.nih.gov/compound/Triflupromazine-hydrochloride#section=Pharmacology-and-Biochemistry	hsa04080	G protein-coupled receptor	Dopamine	5-HT Receptor
M92241	B	9	50	10	DMSO	104344-23-2	T0143	(Â±)-Bisoprolol hemifumarate	(Â±)-Bisoprolol (hemifumarate); Bisoprolol hemifumarate salt; Bisoprolol fumarate; EMD33512	OC(=O)/C=C/C(=O)O.CC(C)NCC(O)COc1ccc(COCCOC(C)C)cc1.CC(C)NCC(O)COc1ccc(COCCOC(C)C)cc1	C20H33NO6	383.49	GPCR/G Protein; Neuroscience	Adrenergic Receptor	Adrenergic Receptor; Î²1-adrenergic receptor	Bisoprolol, a selective beta-1 adrenergic receptor antagonist, selectively and competitively binds to and blocks beta-1 adrenergic receptors in the heart, thereby with antihypertensive activity and devoid of intrinsic sympathomimetic activity.	Breed JG, et al. J Cardiovasc Pharmacol. 1992;20(5):750-5.	5281064	Bisoprolol fumarate; 104344-23-2; Bisoprolol hemifumarate; Detensiel; Isoten; Zebeta; Bisoprolol hemifumarate salt; Euradal; Monocor; Concor; Soprol; Emcor; Emconcor; Speridol; Zabesta; Bisobloc; Bisomerck; Emvoncor; Eurtadal; Fondril; Maintate; Godal; Biso-Puren; Concor Plus Forte; UNII-UR59KN573L; UR59KN573L; (+/-)-Bisoprolol hemifumarate; DTXSID1045794; Bisoprolol fumarate [USAN:USP:JAN]; CL 2…	VMDFASMUILANOL-WXXKFALUSA-N	CHEMBL1472989	BISOPROLOL FUMARATE	Others	Others	Adrenergic Receptor; Others; Others	Î²1-adrenergic receptor	ADRB1	https://pubchem.ncbi.nlm.nih.gov/compound/Bisoprolol#section=Pharmacology-and-Biochemistry	hsa04080	G protein-coupled receptor	Adrenergic_Receptor	Adrenergic Receptor
M92241	B	10	50	10	DMSO	113617-63-3	T0292	Orbifloxacin	CP-104354	C[C@H]1CN(C[C@@H](C)N1)c1c(F)c(F)c2c(c1F)n(cc(C(O)=O)c2=O)C1CC1	C19H20F3N3O3	395.38	Microbiology/virology	Antibacterial; Antibiotic	Antibacterial; Bacterial; Antibiotic	Orbifloxacin is a broad-spectrum fluoroquinolone antibiotic.	GaniÃ¨re JP, et al. Res Vet Sci, 2004, 77(1), 67-71	60605	ORBIFLOXACIN; 113617-63-3; Orbax; Orbifloxacin [INN]; NSC-758614; Orbifloxacin [USP:INN:BAN]; CP-104354; DTXSID7046201; UNII-660932TPY6; 660932TPY6; 3-Quinolinecarboxylic acid, 1-cyclopropyl-7-[(3R,5S)-3,5-dimethyl-1-piperazinyl]-5,6,8-trifluoro-1,4-dihydro-4-oxo-, rel-; NCGC00160518-01; CP 104354; 1-cyclopropyl-7-((3S,5R)-3,5-dimethylpiperazin-1-yl)-5,6,8-trifluoro-4-oxo-1,4-dihydroquinoline-3-c…	QIPQASLPWJVQMH-DTORHVGOSA-N	CHEMBL295433	ORBIFLOXACIN	Others	Others	Antibacterial; Antibiotic; Others; Others	DNA gyrase and topoisomerase IV	GYR, PARC/PARE	https://www.ncbi.nlm.nih.gov/pmc/articles/PMC3088269/	hsa03030 (DNA replication)	Enzymes	Topoisomerase	Antibacterial
M92241	B	11	50	10	DMSO	65899-73-2	T0146	Vagistat	Tioconazole; UK-20349	Clc1c(COC(Cn2ccnc2)c2c(Cl)cc(Cl)cc2)ccs1	C16H13Cl3N2OS	387.71	Microbiology/virology	Anti-infection; Antibiotic; Antifungal	14-Î± Demethylase; Fungal; Antibiotic	Tioconazole is a synthetic imidazole derivative, inhibits cell wall synthesis by inhibiting the biosynthesis of ergosterol or other sterols, damaging the fungal cell membrane, altering its permeability, and promoting loss of essential intracellular elements.	Ballard SA, et al. Biochem Pharmacol. 1988 Dec 15;37(24):4643-51.	5482	tioconazole; 65899-73-2; Vagistat; Vagistat-1; Trosyd; Trosyl; Gyno-trosyd; Fungibacid; Tioconazolum; Zoniden; Tioconazol; Tioconazol [INN-Spanish]; Tioconazolum [INN-Latin]; UK-20349; Tz-3; C16H13Cl3N2OS; New Straitus; (+-)-Tioconazole; 1-(2-((2-chlorothiophen-3-yl)methoxy)-2-(2,4-dichlorophenyl)ethyl)-1H-imidazole; Vagistat-1 (TN); UK 20349; UK-20,349; Tioconazole [USAN:BAN:INN:JAN]; EINECS 265…	QXHHHPZILQDDPS-UHFFFAOYSA-N	CHEMBL1200438	TIOCONAZOLE	Others	Others	Anti-infection; Antibiotic; Antifungal; Others; Others	Fungal sterol synthesis		https://www.accessdata.fda.gov/drugsatfda_docs/label/2011/020991s025lbl.pdf		Antifungal	Fungal_sterol_synthesis	Anti-infection
M92241	B	12	50	10	DMSO	1956-04-02	T0304	Methylthiouracil	MTU; NSC-193526; NSC-9378	Cc1cc(=O)[nH]c(=S)[nH]1	C5H6N2OS	142.18	Apoptosis; Immunology/Inflammation; MAPK; NF-ÎºB	Antiviral; ERK; NF-ÎºB; TNF	antithyroid; NF-ÎºB; TNF Receptor; Interleukin Related; ERK	Methylthiouracil is a thiourea antithyroid agent that inhibits the synthesis of thyroid hormone, and it is used to treat hyperthyroidism.	Crooks J, et al. Br Med J, 1960, 1(5167), 151-154.	667493	methylthiouracil; 6-Methyl-2-thiouracil; 56-04-2; 4-hydroxy-2-mercapto-6-methylpyrimidine; Thimecil; 2-Mercapto-6-methylpyrimidin-4-ol; Methiocil; Alkiron; 2-Thio-6-methyluracil; Thiomecil; Thiothymin; Metacil; Basethyrin; Prostrumyl; Thyreonorm; Thyreostat; Tiomeracil; Antibason; Basecil; Methacil; Methiacil; Methicil; Muracil; Orcanon; Strumacil; Thiomidil; Thioryl; Thiuryl; Tiotiron; Thyril; T…	HWGBHCRJGXAGEU-UHFFFAOYSA-N	CHEMBL1330588	METHYLTHIOURACIL	Others	Others	Antiviral; ERK; NF-ÎºB; TNF; Others; Others	thyroid peroxidase	TPO	Cooper DS. "Antithyroid drugs." The New England Journal of Medicine, 352.9 (2005): 905-917.		Peroxidase	Thyroid_peroxidase	Antiviral
M92241	B	13	50	10	DMSO	152520-56-4	T0154	Nebivolol hydrochloride	R 065824 hydrochloride; Nebivolol HCl; R-65824	Cl.O[C@@H](CNC[C@H](O)[C@@H]1CCc2cc(F)ccc2O1)[C@H]1CCc2cc(F)ccc2O1	C22H25F2NO4Â·HCl	441.9	Apoptosis; GPCR/G Protein; Neuroscience	Adrenergic Receptor; Apoptosis	Adrenergic Receptor; Apoptosis; Î²1-adrenoceptor	Nebivolol hydrochloride is a cardioselective ADRENERGIC BETA-1 RECEPTOR ANTAGONIST (beta-blocker) that functions as a VASODILATOR through the endothelial L-arginine/ NITRIC OXIDE system. It is used to manage HYPERTENSION and chronic HEART FAILURE in elderly patients.	Pauwels PJ, et al. Mol Pharmacol, 1988, 34(6), 843-851.	11626384	Nebivolol hydrochloride; 152520-56-4; Nebivolol HCl; Nebivolol (hydrochloride); rac Nebivolol hydrochloride; (R,S,S,S)-nebivolol hydrochloride; 920299-33-8; CHEMBL2358570; DTXSID1049065; Nebilet; NCGC00183875-01; R 065824 hydrochloride; (1S)-1-[(2R)-6-fluoro-3,4-dihydro-2H-chromen-2-yl]-2-[[(2S)-2-[(2S)-6-fluoro-3,4-dihydro-2H-chromen-2-yl]-2-hydroxyethyl]amino]ethanol;hydrochloride; DTXCID602899…	JWEXHQAEWHKGCW-BIISKSHESA-N	CHEMBL2358570		Others	Others	Adrenergic Receptor; Apoptosis; Others; Others	Î²1-adrenergic receptor	ADRB1	https://www.ncbi.nlm.nih.gov/pmc/articles/PMC4202445/	hsa04080	G protein-coupled receptor	Adrenergic_Receptor	Adrenergic Receptor
M92241	B	14	50	10	DMSO	35212-22-7	T0309	Ipriflavone	Osteofix	CC(C)Oc1cc2c(cc1)c(=O)c(co2)c1ccccc1	C18H16O3	280.32	Others	advanced glycation end products	advanced glycation end products	Ipriflavone (Osteofix) is a feed additive and a catabolic agent. It is used to inhibit bone resorption.	Cheng SL, et al. Calcif Tissue Int, 1994, 55(5), 356-362.	3747	ipriflavone; 35212-22-7; Osten; 7-Isopropoxyisoflavone; Osteofix; Yambolap; Iprosten; Ipriflavonum; Ipriflavona; Osteoquine; Ostivone; 7-Isopropoxy-3-phenyl-4H-1-benzopyran-4-one; Quinogin; 3-phenyl-7-propan-2-yloxychromen-4-one; 7-isopropoxy-3-phenyl-4H-chromen-4-one; Ipriflavone [INN:JAN]; Osten (TN); Ipriflavone (Osteofix); Iprivone; Osteochin; TC 80; Ipriflavonum [INN-Latin]; Ipriflavona [INN…	SFBODOKJTYAUCM-UHFFFAOYSA-N	CHEMBL165790	IPRIFLAVONE	Others	Others	advanced glycation end products; Others; Others	Estrogen Receptors	ER	Gambacciani M, Ciaponi M, Cappagli B, Monteleone P, Benussi C, Bevilacqua G, Genazzani AR. "Effects of low doses of ipriflavone on bone mass in elderly osteoporotic women." Menopause. 2002 Sep-Oct;9(5):354-9. PMID: 12218705	hsa04915	Hormone receptor	Estrogen_Receptor	advanced glycation end products
M92241	B	15	50	10	DMSO	119302-91-9	T0156	Rocuronium bromide	ORG 9426 (Bromide); ORG 9426	CC(=O)O[C@H]1[C@H](C[C@@H]2[C@@]1(CC[C@H]1[C@H]2CC[C@@H]2[C@@]1(C[C@@H]([C@H](C2)O)N1CCOCC1)C)C)[N+]1(CCCC1)CC=C.[Br-]	C32H53BrN2O4	609.68	Neuroscience	AChR	mAChR	Rocuronium is a muscle relaxant or aminosteroid non-depolarizing neuromuscular blocker. During surgery or mechanical ventilation, it is used to facilitate endotracheal intubation and to provide skeletal muscle relaxation.	Zan U, et al. Cytotechnology,2011, 63(3), 239-245.	441351	ROCURONIUM BROMIDE; 119302-91-9; Zemuron; Esmeron; Rocuronium (Bromide); Org-9426; ORG 9426; CHEBI:8885; UNII-I65MW4OFHZ; I65MW4OFHZ; 1-Allyl-1-(3alpha,17beta-dihydroxy-2beta-morpholino-5alpha-androstan-16beta-yl)pyrrolidinium bromide, 17-acetate; DTXSID7023566; Rocuronium bromide [USAN:USP:INN:BAN]; Zemuron (TN); [(2S,3S,5S,8R,9S,10S,13S,14S,16S,17R)-3-hydroxy-10,13-dimethyl-2-morpholin-4-yl-16-…	OYTJKRAYGYRUJK-FMCCZJBLSA-M	CHEMBL1200648	ROCURONIUM BROMIDE	Others	Others	AChR; Others; Others	Acetylcholine receptor	AChR	https://www.accessdata.fda.gov/drugsatfda_docs/label/2010/019034s056lbl.pdf	hsa04080	Ion channel	AChR	AChR
M92241	B	16	50	10	DMSO	136-77-6	T0314	Hexylresorcinol	4-Hexylresorcinol	CCCCCCc1c(O)cc(O)cc1	C12H18O2	194.27	Apoptosis; Microbiology/virology; Proteases/Proteasome	Antibacterial; Apoptosis; Parasite; Tyrosinase	diphenolase; monophenolase; Parasite; Bacterial; Apoptosis	Hexylresorcinol is a substituted dihydroxybenzene used topically as an antiseptic for the treatment of minor skin infections.	Kweon H, et al. Biomaterials. 2014 Oct;35(30):8576-84.	3610	hexylresorcinol; 4-Hexylresorcinol; 136-77-6; 4-hexylbenzene-1,3-diol; 4-Hexyl-1,3-benzenediol; 4-n-Hexylresorcinol; Antascarin; Ascaricid; Ascarinol; p-Hexylresorcinol; Adrover; Caprokol; Hidesol; Oxana; Crystoids; 1,3-Benzenediol, 4-hexyl-; Prensol; 4-Hexylresorcine; Sucrets; Gelovermin; Hexylresorcin; 4-Hexyl-1,3-dihydroxybenzene; Ascaryl; 4-(1-Hexyl)resorcinol; Cystoids anthelmintic; 1,3-Dihy…	WFJIVOKAWHGMBH-UHFFFAOYSA-N	CHEMBL443605	HEXYLRESORCINOL	Others	Others	Antibacterial; Apoptosis; Parasite; Tyrosinase; Others; Others	Tyrosinase	TYR	Parvez, Shouvik et al. â€œInhibitory effect of hexylresorcinol on melanogenesis in B16F10 melanoma cells by down-regulating tyrosinase expression.â€_x009d_ International journal of molecular medicine vol. 19,3 (2007): 341-7. doi:10.3892/ijmm.19.3.341	hsa00350	Oxidase	Tyrosine_Kinase	Antibacterial
M92241	B	17	50	10	DMSO	93793-83-0	T0157	Roxatidine Acetate hydrochloride	HOE 760; Roxatidine Acetate HCl	Cl.CC(=O)OCC(=O)NCCCOc1cccc(CN2CCCCC2)c1	C19H29ClN2O4	384.9	GPCR/G Protein; Immunology/Inflammation; Neuroscience	Histamine Receptor	H2 receptor; Histamine Receptor	Roxatidine Acetate hydrochloride is a specific and competitive histamin H2-receptor antagonist. It inhibits gastric acid secretion and ulcer formation.	Agrawal SS, Alvin Jose M. Syst Biol Reprod Med. 2010 Aug;56(4):286-91.	56704	roxatidine acetate hydrochloride; 93793-83-0; ROXATIDINE ACETATE HCl; Altat; Roxit; Gastralgin; HOE 760; TZU-0460; Hoe-760; Neo H2; Roxatidine (Acetate Hydrochloride); Aceroxatidine hydrochloride; Tzu 0460; CCRIS 3347; Pifatidine hydrochloride; NSC-760384; UNII-60426GOR1E; DTXSID2046670; HOE 062 [ROXATIDINE]; 60426GOR1E; 2-Acetoxy-N-(3-(m-(1-piperidinylmethyl)phenoxy)propyl)acetamide hydrochlorid…	FEWCTJHCXOHWNL-UHFFFAOYSA-N	CHEMBL2104871	ROXATIDINE ACETATE HYDROCHLORIDE	Others	Others	Histamine Receptor; Others; Others	Histamine H2 receptor	HRH2	https://pubmed.ncbi.nlm.nih.gov/17140239/ "Roxatidine- and cimetidine-induced angiogenesis inhibition suppresses growth of colon cancer implants in syngeneic mice."	hsa04020	G protein-coupled receptor (GPCR)	Histamine_Receptor	Histamine Receptor
M92241	B	18	50	10	DMSO	556-08-1	T0315	Acedoben		CC(=O)Nc1ccc(cc1)C(=O)O	C9H9NO3	179.17	Others	Others	Others	Acedoben (4-acetamidobenzoic acid) is the acetyl derivative of para-aminobenzoic acid (PABA).	Franklin MR, et al. Xenobiotica. 1971 Mar;1(2):121-30.	19266	4-Acetamidobenzoic acid; 556-08-1; Acedoben; p-Acetamidobenzoic acid; 4-(Acetylamino)benzoic acid; p-Acetylamino benzoic acid; 4-Carboxyacetanilide; Benzoic acid, 4-(acetylamino)-; 4-Acetylaminobenzoic acid; p-Acetoaminobenzoic acid; PAAB; N-Acetyl-p-aminobenzoic acid; p-Acetaminobenzoic acid; p-Acetylaminobenzoic acid; N-Acetyl-PABA; Para Acetamido Benzoic Acid; Acedoben [INN]; Acedobene; Acedob…	QCXJEYYXVJIFCE-UHFFFAOYSA-N	CHEMBL112687	ACEDOBEN	Others	Others	Others; Others; Others						Others	Others
M92241	B	19	50	10	DMSO	52549-17-4	T0159	Pranoprofen	Pyranoprofen	CC(C(=O)O)c1cc2c(Oc3c(C2)cccn3)cc1	C15H13NO3	255.28	Apoptosis; GPCR/G Protein; Immunology/Inflammation; Neuroscience	Apoptosis; COX; PGE Synthase; Prostaglandin Receptor	COX; Apoptosis; PGE synthase; PGE2	Pranoprofen (INN) is a non-steroidal anti-inflammatory drug used in ophthalmology.	Hosoi T, et al. Neurochem Int,2009, 54(1), 1-6.	4888	pranoprofen; 52549-17-4; Niflan; pyranoprofen; 2-(5H-chromeno[2,3-b]pyridin-7-yl)propanoic acid; Oftalar; Pranoprofene; Pranoprofeno; Pranoprofenum; Elicapric; dl-Pranoprofen; Pranoprofen [INN:JAN]; Pranoprofene [INN-French]; Pranoprofenum [INN-Latin]; Pranoprofeno [INN-Spanish]; 2-{5H-chromeno[2,3-b]pyridin-7-yl}propanoic acid; Y-8004; NSC-759832; BRN 0889798; UNII-2R7O1ET613; 2-(5H-(1)Benzopyra…	TVQZAMVBTVNYLA-UHFFFAOYSA-N	CHEMBL367463	PRANOPROFEN	Others	Others	Apoptosis; COX; PGE Synthase; Prostaglandin Receptor; Others; Others	Cyclooxygenase (COX)	COX	https://pubmed.ncbi.nlm.nih.gov/7510619/	hsa00590 (Arachidonic acid metabolism)	Enzyme	COX	Apoptosis
M92241	B	20	50	10	DMSO	112-38-9	T0306	Undecenoic acid	10-Undecenoic acid; Undecylenic acid	OC(=O)CCCCCCCCC=C	C11H20O2	184.28	Metabolism; Microbiology/virology	Antibiotic; Antifungal; Endogenous Metabolite	antifungal; Fungal; Endogenous Metabolite; Antibiotic	Undecylenic Acid is a natural or synthetic fungistatic fatty acid, with antifungal activity.	EREAUX LP, CRAIG GE. Can Med Assoc J. 1949 Oct;61(4):361-4.	5634	undecylenic acid; 10-UNDECENOIC ACID; Undec-10-enoic acid; 112-38-9; Undecenoic acid; 10-Hendecenoic acid; Desenex; Renselin; Declid; Sevinon; 9-Undecylenic acid; 10-Undecylenic acid; Undecyl-10-enic acid; undecylenate; FEMA No. 3247; Undecylenic acid [JAN]; Kyselina undecylenova; UNDECEN-10-ACID-1; 10-Henedecenoic acid; Caswell No. 901; Undecenoic acid, omega-; Hendecenoic acid, omega-; 10-Hende…	FRPZMMHWLSIFAZ-UHFFFAOYSA-N	CHEMBL1276010	UNDECYLENIC ACID	Others	Others	Antibiotic; Antifungal; Endogenous Metabolite; Others; Others	Antifungal		Sharma, Aditya K., and Gajendra Singh Chauhan. "Undecylenic acid: A valuable and physiologically active renewable building block of castor oil." Renewable and Sustainable Energy Reviews 77 (2017): 425-437.		Antifungal agent	Antifungal	Antibiotic
M92241	B	21	50	10	DMSO	68475-42-3	T0160	Anagrelide	Anagrelida; Anagrelidum; Xagrid	Clc1ccc2NC3=NC(=O)CN3Cc2c1Cl	C10H7Cl2N3O	256.09	Metabolism	PDE	PDE	Anagrelide is a Platelet-reducing Agent. The mechanism of action of anagrelide is as a Phosphodiesterase 3 Inhibitor. The physiologic effect of anagrelide is by means of Decreased Platelet Production.	Venuti MC, et al. J Med Chem. 1988 Nov; 31(11): 2136-45.	135409400	anagrelide; 68475-42-3; Anagrelida; Anagrelidum; Xagrid; 6,7-Dichloro-5,10-dihydroimidazo[2,1-b]quinazolin-2(3H)-one; Anagrelide [INN:BAN]; Anagrelidum [INN-Latin]; Anagrelida [INN-Spanish]; C10H7Cl2N3O; Anagrelide(13C3); BL 416201; HSDB 7325; Anagrelide (INN/BAN); Anagrelide [BAN:INN]; 6,7-dichloro-5,10-dihydro-3H-imidazo[2,1-b]quinazolin-2-one; CHEMBL760; BRN 0619582; UNII-K9X45X0051; 6,7-Dichl…	OTBXOEAOVRKTNQ-UHFFFAOYSA-N	CHEMBL760	ANAGRELIDE	Others	Others	PDE; Others; Others	Phosphodiesterase 3	PDE3	https://www.ncbi.nlm.nih.gov/pmc/articles/PMC1884457/	hsa04024	Enzyme	PDE	PDE
M92241	B	22	50	10	DMSO	17896-21-8	T0316	Citiolone	Citiolase; Thioxidrene	CC(=O)NC1CCSC1=O	C6H9NO2S	159.21	Others	Others	Others	Citiolone, a drug used in liver treatment, is a derivative of the amino acid cysteine.	de Barrio M, et al. J Investig Allergol Clin Immunol. 1997 May-Jun;7(3):193-4.	14520	citiolone; 1195-16-0; 17896-21-8; Citiolase; Thioxidrene; Ahctl; Achtl; DL-N-Acetylhomocysteine thiolactone; AHCT; Acetamide, N-(tetrahydro-2-oxo-3-thienyl)-; N-(2-Oxotetrahydrothiophen-3-yl)acetamide; N-Acetyl-dl-homocysteine thiolactone; N-Acetylhomocysteine thiolactone; N-(2-oxothiolan-3-yl)acetamide; N-(TETRAHYDRO-2-OXO-3-THIENYL)ACETAMIDE; 2-Acetamido-4-mercaptobutyric acid gamma-thiolactone…	NRFJZTXWLKPZAV-UHFFFAOYSA-N	CHEMBL2104457	CITIOLONE	Others	Others	Others; Others; Others						Others	Others
M92241	C	3	50	10	DMSO	52789-62-5	T2159	CaMKP Inhibitor		[Na+].Nc1c(cc(c2c1c(O)ccc2)S(=O)(=O)[O-])S(=O)(=O)O	C10H12NNaO9S2	377.32	Neuroscience	CaMK	CaMKP	CaMKP Inhibitor can inhibit CaMKP.	Nishizawa, E., Wynalda, D., & Lednicer, D. (1973). NON-THROMBOGENIC SURFACE INHIBITING PLATELET ADHERENCE.Â ASAIO Journal,Â 19(1), 13-18. doi: 10.1097/00002480-197301900-00003	60161115	CaMKP Inhibitor; 52789-62-5; sodium;4-amino-5-hydroxy-3-sulfonaphthalene-1-sulfonate; 1-Amino-8-naphthol-2,4-disulfonic Acid Monosodium Salt; 1,3-Naphthalenedisulfonicacid, 4-amino-5-hydroxy-, sodium salt (1:1); 1-Amino-8-naphthol-2,4-disulfonic acid monosodium salt hydrate; 1,3-Naphthalenedisulfonic acid, 4-amino-5-hydroxy-, monosodium salt; AKOS028109625; FT-0640107; D88253; SODIUM 4-AMINO-5-HY…	JOVLEOXYYWEEEW-UHFFFAOYSA-M			Others	Others	CaMK; Others; Others	Calcium/Calmodulin-dependent Protein Kinase Phosphatase	CaMKP			Phosphatase	CaMK	CaMK
M92241	C	4	50	10	DMSO	27220-47-9	T0444	Econazole	(Â±)-Econazol	Clc1ccc(COC(Cn2ccnc2)c2c(Cl)cc(Cl)cc2)cc1	C18H15Cl3N2O	381.68	Microbiology/virology	Anti-infection; Antibiotic; Antifungal	14-Î± Demethylase; Fungal; Antibiotic	Econazole is an imidazole derivative that is commonly used as a topical antifungal agent.	Ge S, et al. Int J Pharm. 2014 Apr 25; 465(1-2):120-31.	3198	econazole; 27220-47-9; Ecostatin; Econazolum; Pevaryl; Gyno-pevaryl; (+-)-Econazole; Econazol; Palavale; 1-[2-[(4-chlorophenyl)methoxy]-2-(2,4-dichlorophenyl)ethyl]imidazole; Econazole [USAN]; Econazole (USAN/INN); Econazol [INN-Spanish]; NSC 187789; NSC-187789; micofugal; UNII-6Z1Y2V4A7M; 1-(2-((4-Chlorobenzyl)oxy)-2-(2,4-dichlorophenyl)ethyl)-1H-imidazole; Econazole [USAN:INN:BAN]; 6Z1Y2V4A7M; …	LEZWWPYKPKIXLL-UHFFFAOYSA-N	CHEMBL808	ECONAZOLE	Others	Others	Anti-infection; Antibiotic; Antifungal; Others; Others	lanosterol 14-alpha demethylase	CYP51	Vanden Bossche H, Marichal P, Odds FC. "Molecular mechanisms of drug resistance in fungi." Trends in Microbiology. 1994 Nov;2(11):393-400.	hsa00100 (Steroid biosynthesis)	Enzyme	Lanosterol_Demethylase	Anti-infection
M92241	C	5	50	10	DMSO	550999-74-1	T2285	EVP-6124 hydrochloride	Encenicline hydrochloride; EVP-6124 (hydrochloride)	C1CN2C[C@@H](C1CC2)NC(=O)c1sc2c(c1)cccc2Cl.Cl	C16H17ClN2OSÂ·HCl	357.3	Neuroscience	AChR	nAChR; Î±7 nAChR	EVP-6124 hydrochloride is a new-type partial agonist of Î±7 neuronal nicotinic acetylcholine receptors (nAChRs).	Prickaerts, J., van Goethem, N., Chesworth, R., Shapiro, G., Boess, F., & Methfessel, C. et al. (2012). EVP-6124, a novel and selective Î±7 nicotinic acetylcholine receptor partial agonist, improves memory performance by potentiating the acetylcholine response of Î±7 nicotinic acetylcholine receptors.Â Neuropharmacology,Â 62(2), 1099-1110. doi: 10.1016/j.neuropharm.2011.10.024	46208542	Encenicline hydrochloride; 550999-74-1; EVP-6124 hydrochloride; EVP-6124 (hydrochloride); Encenicline HCl salt; Encenicline hydrochloride [USAN]; UNII-VYV1YE9W06; VYV1YE9W06; 550999-74-1 (HCl); (R)-7-chloro-N-(quinuclidin-3-yl)benzo[b]thiophene-2-carboxamide hydrochloride; Encenicline hydrochloride (USAN); (R)-7-chloro-N-(quinuclidin-3-yl)benzo[b]thiophene-2-carboxamide hydrochloride.; Benzo(b)th…	OIJYTJGIDVTCFF-ZOWNYOTGSA-N	CHEMBL3137323	ENCENICLINE HYDROCHLORIDE	Others	Others	AChR; Others; Others	alpha-7 nicotinic acetylcholine receptor	Î±7 nAChR	Prickaerts J, van Goethem NP, Chesworth R, Shapiro G, Boess FG, Methfessel C, Reneerkens OA, Flood DG, Hilt D, Gawryl M, Bertrand S, Bertrand D, KÃ¶nig G. EVP-6124, a novel and selective Î±7 nicotinic acetylcholine receptor agonist, improves memory performance by potentiating the acetylcholine response of Î±7 nicotinic acetylcholine receptors. Neuropharmacology. 2012 Feb;62(2):1099-110. doi: 10.1…	hsa04725	Receptor agonist	AChR	AChR
M92241	C	6	50	10	DMSO	2295-58-1	T0525	Flopropione	Phloropropiophenone	CCC(=O)c1c(O)cc(O)cc1O	C9H10O4	182.18	GPCR/G Protein; Metabolism; Neuroscience	5-HT Receptor; Transferase	5-HT Receptor; COMT; 5-HT1A	Flopropione, a spasmolytic or antispasmodic agent, is used as a 5-HT1A receptor antagonist.	Aso Y, et al. J Pharm Sci, 2000, 89(3), 408-416.	3362	flopropione; 2295-58-1; 2',4',6'-Trihydroxypropiophenone; 1-(2,4,6-trihydroxyphenyl)propan-1-one; Phloropropiophenone; Cospanon; Argobyl; Phloropropionone; Propiophloroglucine; Flopropion; Chlonarin; Ecapron; Gasstenon; Labroda; Labrodax; Supanate; Supazlun; Labrodax supanate; Propionylphloroglucinol; 1-Propanone, 1-(2,4,6-trihydroxyphenyl)-; Ephtanon; 2,4,6-Trihydroxypropiophenone; 1-(2,4,6-Trih…	PTHLEKANMPKYDB-UHFFFAOYSA-N	CHEMBL1605835	FLOPROPIONE	Others	Others	5-HT Receptor; Transferase; Others; Others	5-HT Receptor				G protein-coupled receptor	5-HT	5-HT Receptor
M92241	C	7	50	10	DMSO	70553-76-3	T3054	Daurisoline	(R,R)-Daurisoline	CN1CCc2cc(c(cc2[C@H]1Cc1ccc(cc1)Oc1c(ccc(c1)C[C@@H]1c2cc(c(cc2CCN1C)OC)O)O)OC)OC	C37H42N2O6	610.75	Autophagy; Membrane transporter/Ion channel	Autophagy; Potassium Channel	Autophagy; Potassium Channel	Daurisoline is a hERG inhibitor and also an autophagy blocker.	Liu QN, et al. Am J Chin Med. 2010;38(1):37-49.	51106	Daurisoline; 70553-76-3; O(sup 7)-Demethyldauricine; (R,R)-Daurisoline; (1R)-1-[[3-[4-[[(1R)-6,7-dimethoxy-2-methyl-3,4-dihydro-1H-isoquinolin-1-yl]methyl]phenoxy]-4-hydroxyphenyl]methyl]-6-methoxy-2-methyl-3,4-dihydro-1H-isoquinolin-7-ol; CHEMBL2216904; D 610; (R-(R*,R*))-1,2,3,4-Tetrahydro-1-((4-hydroxy-3-(4-((1,2,3,4-tetrahydro-6,7-dimethoxy-2-methyl-1-isoquinolinyl)methyl)phenoxy)phenyl)methy…	BURJAQFYNVMZDV-FIRIVFDPSA-N	CHEMBL2216904	DARUISOLINE	Others	Others	Autophagy; Potassium Channel; Others; Others	Potassium Channel	KCN	Cheung, Y.Y., Chen, K.C., Chen, H., Chan, J.Y., & Wang, H.D. "Protective roles of Cordyceps on lung fibrosis in cellular and rat models." Journal of Ethnopharmacology, 143(2), 448-454 (2012).	hsa04024 (cAMP signaling pathway)	Ion channel	Potassium_Channel	Autophagy
M92241	C	8	50	10	DMSO	33401-94-4	T0395	Pyrantel tartrate	Banminth	O[C@H]([C@@H](O)C(=O)O)C(=O)O.CN1CCCN=C1/C=C/c1cccs1	C15H20N2O6S	356.39	Microbiology/virology	Antibiotic; Parasite	Antibiotic; Parasite	Pyrantel tartrate is broad spectrum anthelmintic for livestock.	Pratt SE, et al. Am J Vet Res. 1981 May;42(5):871-2.	6434144	PYRANTEL TARTRATE; 33401-94-4; Pyrantel tartrate salt; Banminth; Pyrantel (tartrate); Pyrequan tartrate; Pyrantel tartrate [USAN]; Pyrantel hydrogen tartrate; Banminth 48; Pyrantel (+)-tartrate salt; C11H14N2S.C4H6O6; EINECS 251-501-8; UNII-SC82VF0480; Pyrimidine, 1,4,5,6-tetrahydro-1-methyl-2-(2-(2-thienyl)ethenyl)-, (E)-, (R-(R*,R*))-2,3-dihydroxybutanedioate (1:1); DTXSID4048858; CP 10423-18; …	VWRCYAZJKNPEQR-NIEARKAZSA-N	CHEMBL2105309		Others	Others	Antibiotic; Parasite; Others; Others	Nicotinic acetylcholine receptors	nAChRs	https://www.ncbi.nlm.nih.gov/pmc/articles/PMC3124641/	hsa04080	Ion channel	AChR	Antibiotic
M92241	C	9	50	10	DMSO	72962-43-7	T3151	Brassinolide	Brassin lactone; 24-Epibrassinolide	CC(C)[C@H](C)[C@@H](O)[C@H](O)[C@@H](C)[C@H]1CC[C@H]2[C@@H]3COC(=O)[C@H]4C[C@H](O)[C@H](O)C[C@]4(C)[C@H]3CC[C@]12C	C28H48O6	480.68	Apoptosis	Apoptosis	Apoptosis; plant growth modulator	Brassinolide is a plant hormone isolated from rapeseed (Brassica napus) promoting stem elongation and cell division.	Wu YD, et al. Brassinolide, a plant sterol from pollen of Brassica napus L., induces apoptosis in human prostate cancer PC-3 cells. Pharmazie. 2007 May;62(5):392-5.	115196	Brassinolide; 72962-43-7; 24-Epibrassinolide; UNII-Y9IQ1L53OX; NSC 325306; Y9IQ1L53OX; Brassin lactone; 2alpha,3alpha,22alpha,23alpha-Tetrahydroxy-24alpha-methyl-B-homo-7-oxa-5alpha-cholestan-6-one; 6H-Benz(c)indeno(5,4-e)oxepin-6-one, 1-((1S,2R,3R,4S)-2,3-dihydroxy-1,4,5-trimethylhexyl)hexadecahydro-8,9-dihydroxy-10a,12a-dimethyl-, (1R,3aS,3bS,6aS,8S,9R,10aR,10bS,12aS)-; B-Homo-7-oxaergostan-6-o…	IXVMHGVQKLDRKH-KNBKMWSGSA-N			Others	Others	Apoptosis; Others; Others	Brassinosteroid receptor BRI1	BRI1	Clouse, S. D. "Brassinosteroids." Hormones, Brain and Behavior (Second Edition), 2002, Pages 179-215	map04075	Kinase	Brassinosteroid_receptor_BRI1	Apoptosis
M92241	C	10	50	10	DMSO	8/7/1953	T0383	Fenspiride hydrochloride	Fenspiride HCl; Decaspiride; Fluiden; Pneumorel	C1CN(CCC21CNC(=O)O2)CCc1ccccc1.Cl	C15H20N2O2Â·HCl	296.79	GPCR/G Protein; Immunology/Inflammation; Metabolism; Neuroscience	Adrenergic Receptor; Histamine Receptor; PDE	Adrenergic Receptor; Histamine Receptor; PDE3; PDE4	Fenspiride, an oxazolidinone spiro compound, is a drug used in the therapy of certain respiratory diseases. It is approved for use in Russia for the therapy of chronic and acute inflammatory diseases of ENT organs and the respiratory tract (like sinusitis, tracheobronchitis, otitis, laryngitis, and rhinopharyngitis), and for maintenance therapy of asthma.	Cortijo J, et al. Eur J Pharmacol, 1998, 341(1), 79-86.	68626	Fenspiride hydrochloride; Fenspiride HCl; 5053-08-7; Fluiden; Decaspiride; Pneumorel; Fenspiride (Hydrochloride); Espiran; NDR-5998A; NAT-333; JP 428; Tegencia hydrochloride; Fenspiride hydrochloride [USAN]; Viarespan hydrochloride; 8-(2-Phenylethyl)-1-oxa-3,8-diazaspiro[4.5]decan-2-one hydrochloride; Fenspiride-d5Hydrochloride; NSC-757825; DTXSID3045770; 832NBX878V; 8-(2-Phenylethyl)-1-oxa-3,8-d…	FIKFLLIUPUVONI-UHFFFAOYSA-N	CHEMBL1256849	FENSPIRIDE HYDROCHLORIDE	Others	Others	Adrenergic Receptor; Histamine Receptor; PDE; Others; Others	Histamine H1 receptor and Î±-adrenergic receptors (Î±-AR)	HRH1, ADRA	Malerba, M., & Ragnoli, B. (2008). Fenspiride, an anti-inflammatory drug for bronchial diseases: a review of pharmacology, pharmacokinetics, clinical efficacy and tolerability. Pulmonary Pharmacology & Therapeutics, 21(5), 748-758. https://doi.org/10.1016/j.pupt.2008.06.001	hsa04080 (for Histamine Receptor), hsa04020 (for Adrenergic Receptor)	Receptors	Histamine_Receptor	Adrenergic Receptor
M92241	C	11	50	10	DMSO	77-54-3	T2956	Cedryl acetate	Cedrol acetate; Cedranyl acetate	[C@@]123[C@H](C([C@@H](C1)[C@](CC2)(C)OC(=O)C)(C)C)CC[C@H]3C	C17H28O2	264.41	Microbiology/virology	Antifungal	antifungal	Cedryl Acetate, an acetylated from cedarwood oil, has been applied to chemistry for its properties as a chiral and cell signaling reagent with antifungal and immunotoxicity functions.	Sultan S, et al. Eur J Med Chem. 2013 Apr;62:764-70.	13918856	Cedryl acetate; 77-54-3; Cedrol acetate; Cedrol, acetate; 61789-42-2; Cedranyl acetate; 0WS0WJ9WNV; [(1S,2R,5S,7R,8R)-2,6,6,8-tetramethyl-8-tricyclo[5.3.1.01,5]undecanyl] acetate; Cedarwood acetate; (3R,3aS,6R,7R,8aS)-3,6,8,8-Tetramethyloctahydro-1H-3a,7-methanoazulen-6-yl acetate; 1H-3a,7-Methanoazulen-6-ol, octahydro-3,6,8,8-tetramethyl-, 6-acetate, (3R,3aS,6R,7R,8aS)-; Acetic acid, cedrol este…	HQKQRXZEXPXXIG-DTWJZALFSA-N			Others	Others	Antifungal; Others; Others						Antifungal	Antifungal
M92241	C	12	50	10	DMSO	130-61-0	T0365	Thioridazine hydrochloride	Aldazine; Mellaril	Cl.CSc1cc2c(Sc3ccccc3N2CCC2CCCCN2C)cc1	C21H27ClN2S2	407.04	Apoptosis; Autophagy; GPCR/G Protein; Membrane transporter/Ion channel; Microbiology/virology; Neuroscience	5-HT Receptor; Adrenergic Receptor; Antibacterial; Apoptosis; Autophagy; Dopamine Receptor; Potassium Channel	5-HT; Adrenergic Receptor; Dopamine; Potassium Channel; Dopamine Receptor; Apoptosis; 5-HT Receptor; Autophagy; Bacterial	Thioridazine, an antipsychotic drug, is used in the therapy of psychosis and schizophrenia and shows serotonin antagonism or D4 selectivity.	Assie MB, et al. Eur J Pharmacol. 1993 Jun 24;237(2-3):183-9.	66062	Thioridazine hydrochloride; 130-61-0; Thioridazine Hcl; Sonapax hydrochloride; Thioridazine chloride; Mellaril hydrochloride; Thioridazine.HCl; Aldazine; Thioridazine (hydrochloride); USAF SZ-B; Melleril (tablet); USAF SZ-3; Melzine; 10-[2-(1-methylpiperidin-2-yl)ethyl]-2-(methylsulfanyl)-10H-phenothiazine hydrochloride; Thioridazine hydrochloride [JAN]; EINECS 204-992-8; UNII-4WCI67NK8M; NSC 186…	NZFNXWQNBYZDAQ-UHFFFAOYSA-N	CHEMBL1200916	THIORIDAZINE HYDROCHLORIDE	Others	Others	5-HT Receptor; Adrenergic Receptor; Antibacterial; Apoptosis; Autophagy; Dopamine Receptor; Potassium Channel; Others; Others	Dopamine Receptor	DR	Schotte A, Janssen PF, Gommeren W, Luyten WH, Van Gompel P, Lesage AS, De Loore K, Leysen JE. "Risperidone compared with new and reference antipsychotic drugs: in vitro and in vivo receptor binding." Psychopharmacology (Berl). 1996 Mar;124(1-2):57-73. doi: 10.1007/bf02245606. PMID: 8935801.	hsa04080	Receptor	Dopamine	5-HT Receptor
M92241	C	13	50	10	DMSO	79183-19-0	T1772	Apoptosis Activator 2	MDK83190	Clc1c(Cl)cc(CN2C(=O)C(=O)c3ccccc23)cc1	C15H9Cl2NO2	306.14	Apoptosis; Proteases/Proteasome	Apoptosis; Caspase	Apoptosis; Caspase-3	Apoptosis Activator 2 is a potent apoptosis activator, induceing caspase-3 activation, PARP cleavage, and DNA fragmentation .	Nguyen JT, et al. Proc Natl Acad Sci U S A, 2003, 100(13), 7533-7538.	1901244	Apoptosis Activator 2; 79183-19-0; 1-(3,4-dichlorobenzyl)indoline-2,3-dione; 1-(3,4-Dichlorobenzyl)-1H-indole-2,3-dione; MDK83190; 1-[(3,4-dichlorophenyl)methyl]indole-2,3-dione; RSY8DE8DGH; 1-[(3,4-Dichlorophenyl)methyl]-1H-indole-2,3-dione; Apoptosis Activator II; 1-((3,4-Dichlorophenyl)methyl)-1H-indole-2,3-dione; 1-((3,4-Dichlorophenyl)methyl)indole-2,3-dione; 1H-Indole-2,3-dione, 1-((3,4-dic…	KGRJPLRFGLMQMV-UHFFFAOYSA-N	CHEMBL375126		Others	Others	Apoptosis; Caspase; Others; Others	Caspase	CASP	https://www.sciencedirect.com/science/article/pii/S0960894X14013637 (Wang Z, et al. "Identification and bioactivity evaluation of a series of apoptosis activators that selectively activate procaspase-3 to caspase-3." Bioorg Med Chem Lett. 2014 Nov 1;24(21):4923-6.)	hsa04210	Protease	Caspase	Apoptosis
M92241	C	14	50	10	DMSO	476-66-4	T0465	Ellagic acid	Elagostasine; Gallogen	Oc1c(O)c2c3c(c1)c(=O)oc1c3c(cc(O)c1O)c(=O)o2	C14H6O8	302.19	Angiogenesis; Chromatin/Epigenetic; Cytoskeletal Signaling; GPCR/G Protein; Immunology/Inflammation; Membrane transporter/Ion channel; Metabolism; Stem Cells; Tyrosine Kinase/Adaptors	ATPase; Carbonic Anhydrase; Casein Kinase; Endogenous Metabolite; Hedgehog/Smoothened; PKA; PKC; ROS; Syk	Carbonic anhydrase; CK2; Smoothened; PKA; PKC; Syk; ATP-competitive CK2; Casein Kinase; Reactive Oxygen Species; Endogenous Metabolite	Ellagic acid is a fused four ring compound isolated from the kino of Eucalyptus maculata Hook and E. Hemipholia F. Muell. Activates Factor XII of the blood clotting system which also causes kinin release; used in research and as a dye.	Sekiguchi Y, et al. Bioorg Med Chem Lett. 2009 Jun 1;19(11):2920-3.	5281855	ellagic acid; 476-66-4; Benzoaric acid; Elagostasine; Lagistase; Eleagic acid; Alizarine Yellow; 2,3,7,8-Tetrahydroxychromeno[5,4,3-cde]chromene-5,10-dione; Gallogen; Llagic acid; Acido elagico; Acidum ellagicum; Ellagicacid; Acide ellagique; Gallogen (astringent); C.I. 55005; C.I. 75270; Gallogen (VAN); CCRIS 774; Ellagsaeure; Ellagate; C14H6O8; Pomegranate juice; Ellagic acid [INN:DCF]; UNII-19…	AFSDNFLWKVMVRB-UHFFFAOYSA-N	CHEMBL6246	ELLAGIC ACID	Others	Others	ATPase; Carbonic Anhydrase; Casein Kinase; Endogenous Metabolite; Hedgehog/Smoothened; PKA; PKC; ROS; Syk; Others; Others	DNA		Narayanan BA, Geoffroy O, Willingham MC, Re GG, Nixon DW. "p53/p21(WAF1/CIP1) expression and its possible role in G1 arrest and apoptosis in ellagic acid treated cancer cells." Cancer Letters 136.2 (1999): 215-221.			DNA/RNA_Associated	ATPase
M92241	C	15	50	10	DMSO	100-51-6	T0732	Benzyl alcohol	Benzenemethanol; Phenylmethanol; Phenylcarbinol; Benzoyl alcohol	OCC1=CC=CC=C1	C7H8O	108.14	Metabolism	Dehydrogenase	ALDH	Benzyl alcohol, a colorless liquid, is an aromatic alcohol with a mild pleasant aromatic odor.	McCloskey SE, et al. J Pharm Sci. 1986, 75(7):702-705.	244	benzyl alcohol; phenylmethanol; benzenemethanol; 100-51-6; phenylcarbinol; Benzoyl alcohol; benzylalcohol; Benzenecarbinol; alpha-Toluenol; Phenylmethyl alcohol; Hydroxytoluene; (Hydroxymethyl)benzene; Phenolcarbinol; Benzal alcohol; alpha-hydroxytoluene; benzylic alcohol; Alcool benzylique; Benzylicum; Methanol, phenyl-; Phenylcarbinolum; hydroxymethylbenzene; Bentalol; Euxyl K 100; Ulesfia; Phe…	WVDDGKGOMKODPV-UHFFFAOYSA-N	CHEMBL720	BENZYL ALCOHOL	Others	Others	Dehydrogenase; Others; Others	alcohol dehydrogenase	ADH	https://www.ncbi.nlm.nih.gov/pubmed/15726120	hsa00010	Dehydrogenase	Alcohol_dehydrogenase	Dehydrogenase
M92241	C	16	50	10	DMSO	60-87-7	T0445	Promethazine	Proazamine; Diphergan	CC(CN1c2ccccc2Sc2ccccc12)N(C)C	C17H20N2S	284.42	GPCR/G Protein; Immunology/Inflammation; Neuroscience	5-HT Receptor; AChR; Adrenergic Receptor; CaMK; Dopamine Receptor; Histamine Receptor	5-HT; mAChR; Adrenergic Receptor; CAM; D2; H1 receptor	Tafluprost(AFP-168) is an analogue of anti-glaucoma prostaglandin (PG) .	Suzuki A, et al. Ther Drug Monit. 2003 Apr; 25(2):192-6.	4927	promethazine; Proazamine; Diphergan; 60-87-7; Protazine; Promethazin; Prometazin; Prothazin; Vallergine; Dimapp; Fargan; Procit; Promazinamide; Promezathine; Phenargan; Phensedyl; Diprazine; Histargan; Phargan; Tanidil; Thiergan; Isophenergan; Pyrethiazine; Diprozin; Fenetazina; Provigan; Avomine; Fenazil; Hiberna; Prorex; Lilly 1516; Prometazina; Antiallersin; Fenetazine; Phenerzine; Pipolphene;…	PWWVAXIEGOYWEE-UHFFFAOYSA-N	CHEMBL643	PROMETHAZINE	Others	Others	5-HT Receptor; AChR; Adrenergic Receptor; CaMK; Dopamine Receptor; Histamine Receptor; Others; Others	Histamine H1 receptor	H1R	https://pubchem.ncbi.nlm.nih.gov/compound/Promethazine#section=Pharmacology-and-Biochemistry	hsa04080	receptor	Histamine_Receptor	5-HT Receptor
M92241	C	17	50	10	DMSO	100-55-0	T1299	Roniacol	Nicotinyl alcohol	OCc1cnccc1	C6H7NO	109.13	Others	Others	Others	Roniacol is an alcohol analog of NICOTINIC ACID which is a direct-acting peripheral vasodilator that causes flushing and may decrease blood pressure. It is used in vasospasm and threatened GANGRENE.	Dujovne CA, et al. Am J Med Sci. 1979 May-Jun;277(3):255-61.	7510	3-PYRIDINEMETHANOL; 100-55-0; Nicotinyl alcohol; pyridin-3-ylmethanol; 3-(Hydroxymethyl)pyridine; Nicotinic alcohol; 3-Pyridylcarbinol; 3-Pyridylmethanol; Roniacol; Pyridylcarbinol; 3-Pyridinylmethanol; Pyridine-3-carbinol; Pyridine-3-methanol; beta-Pyridylcarbinol; Pyridylmethanol; (Pyridin-3-yl)methanol; .beta.-Pyridylcarbinol; Ro-1-5155; 3-Picolyl alcohol; NU-2121; beta-Picolyl alcohol; beta-P…	MVQVNTPHUGQQHK-UHFFFAOYSA-N	CHEMBL1235535	NICOTINYL ALCOHOL	Others	Others	Others; Others; Others						Others	Others
M92241	C	18	50	10	DMSO	57-96-5	T0435	Sulfinpyrazone	(+/-)-Sulfinpyrazone; G-28315; NSC 75925	O=C1C(CCS(=O)c2ccccc2)C(=O)N(N1c1ccccc1)c1ccccc1	C23H20N2O3S	404.48	Immunology/Inflammation; Neuroscience	COX	COX; cMOAT	Sulfinpyrazone is a uricosuric drug that is used to reduce the serum urate levels in gout therapy. It lacks anti-inflammatory, analgesic, and diuretic properties.	Raeder EA, et al. Am J Cardiol. 1982, 50(2):271-275.	5342	sulfinpyrazone; 57-96-5; Sulphinpyrazone; Anturane; (+/-)-SULFINPYRAZONE; Sulfinpyrazon; Anturan; Diphenylpyrazone; Sulfoxyphenylpyrazolidine; Anturanil; Anturidin; Enturen; Anturano; 1,2-Diphenyl-4-(2-(phenylsulfinyl)ethyl)pyrazolidine-3,5-dione; Sulfinpyrazine; USAF GE-13; Sulfinpyrazonum; Anturen; Enturan; NSC 75925; Apo-Sulfinpyrazone; Sulfinpirazona; 4-[2-(benzenesulfinyl)ethyl]-1,2-diphenyl…	MBGGBVCUIVRRBF-UHFFFAOYSA-N	CHEMBL832	SULFINPYRAZONE	Others	Others	COX; Others; Others	Prostaglandin G/H synthase 1	COX-1	https://pubchem.ncbi.nlm.nih.gov/compound/Sulfinpyrazone#section=Pharmacology-and-Biochemistry	hsa00590	Oxidoreductase	Prostaglandin	COX
M92241	C	19	50	10	DMSO	102-29-4	T0339	Resorcin monoacetate		CC(=O)OC1=CC=CC(=C1)O	C8H8O3	152.15	Others	Others	Others	Resorcinol monoacetate is an antiseptic and a disinfectant, is a chemical intermediate for the production of many other pharmaceuticals, and can be used to treat acne, seborrheic dermatitis, eczema, psoriasis, and other skin disorders.	Bull Am Pharm Assoc. 1946 Jan-Feb;14:35.	5055	RESORCINOL MONOACETATE; 102-29-4; 3-Hydroxyphenyl acetate; Euresol; Remonol; Acetylresorcinol; 3-Acetoxyphenol; Resorcitate; 1,3-Benzenediol, 1-acetate; 1,3-Benzenediol, monoacetate; resorcinol acetate; m-Hydroxyphenyl acetate; (3-hydroxyphenyl) acetate; Resorcin monoacetate; Resorcinol, monoacetate; m-Acetoxyphenol; Resorcinol (monoacetate); Resorcin acetate; Acetylresorcinol;Resorcin monoacetat…	ZZPKZRHERLGEKA-UHFFFAOYSA-N	CHEMBL1593874	RESORCINOL MONOACETATE	Others	Others	Others; Others; Others						Others	Others
M92241	C	20	50	10	DMSO	70458-95-6	T0425	Pefloxacin Mesylate	Pefloxacinium mesylate	n1(cc(c(=O)c2cc(c(cc12)N1CCN(CC1)C)F)C(=O)O)CC.CS(=O)(=O)O	C18H24FN3O6S	429.46	DNA Damage/DNA Repair; Microbiology/virology	Antibacterial; Antibiotic; Topoisomerase	Bacterial; Antibiotic; Topo IV	Pefloxacin mesylate is a synthetic broad-spectrum fluoroquinolone antibacterial agent active against most gram-negative and gram-positive bacteria.	Vila J, et al. Int J Antimicrob Agents. 2006 Jul;28(1):19-24.	119525	Pefloxacin mesylate; 70458-95-6; Pefloxacin methanesulfonate; PEFLOXACINE MESYLATE; Pefloxacin mesylate [USAN]; Pefloxacin (mesylate); 41 982 RP; pefloxacin mesilate; 208265-92-3; 1589 mR.B.; EINECS 274-613-9; UNII-5IAD0UV3FH; 5IAD0UV3FH; NSC-758944; Pefloxacinium mesylate; DTXSID8045935; C17H20FN3O3.CH4O3S; 1-ethyl-6-fluoro-7-(4-methylpiperazin-1-yl)-4-oxoquinoline-3-carboxylic acid;methanesulfo…	HQQSBEDKMRHYME-UHFFFAOYSA-N	CHEMBL1428564	PEFLOXACIN MESYLATE	Others	Others	Antibacterial; Antibiotic; Topoisomerase; Others; Others	DNA gyrase and topoisomerase IV	GYRASE/TOPO IV	"Fluoroquinolone antimicrobial agents." by Andriole VT. The New England Journal of Medicine. 1992 Feb 13;326(7):482-92.	hsa03030 (DNA replication)	Topoisomerase	Topoisomerase	Antibacterial
M92241	C	21	50	10	DMSO	102-60-3	T2206	Edetol	EDTP; N,N,Nâ€²,Nâ€²-Tetrakis(2-hydroxypropyl)ethylenediamine; Quadrol	CC(CN(CCN(CC(C)O)CC(C)O)CC(C)O)O	C14H32N2O4	292.41	Others	Others	Others	Quadrol is an immunostimulant, accelerated wound healing.	Bhide MV, et al. In vitro stimulation of macrophages by quadrol [N,N,N',N'-tetrakis(2-hydroxypropyl)ethylenediamine]. J Immunopharmacol. 1985;7(3):303-12.	7615	102-60-3; Edetol; Quadrol; N,N,N',N'-Tetrakis(2-hydroxypropyl)ethylenediamine; Entprol; Neutrol TE; Adeka Quadrol; Quadrol L; 1,1',1'',1'''-(Ethylenedinitrilo)tetra-2-propanol; Tetrahydroxypropyl ethylenediamine; 1,1',1'',1'''-(Ethane-1,2-diylbis(azanetriyl))tetrakis(propan-2-ol); 2-Propanol, 1,1',1'',1'''-(1,2-ethanediyldinitrilo)tetrakis-; Edetolum [Latin]; Edetol [USAN:INN]; Edetolum; NSC 3692…	NSOXQYCFHDMMGV-UHFFFAOYSA-N	CHEMBL1573178	EDETOL	Others	Others	Others; Others; Others						Others	Others
M92241	C	22	50	10	DMSO	51940-44-4	T0396	Pipemidic acid	Acido pipemidico	CCn1cc(C(=O)O)c(=O)c2cnc(nc12)N1CCNCC1	C14H17N5O3	303.32	Microbiology/virology	Antibacterial; Antibiotic	Antibiotic; Bacterial	Pipemidic acid, a new antibacterial agent, inhibits the activity of Pseudomonas aeruginosa.	Hoeglund AB, et al.J Med Chem. 2010 Feb 11;53(3):1056-66.	4831	pipemidic acid; 51940-44-4; Pipedac; Deblaston; Pipemid; Pipram; Acido pipemidico; Dolcol; Palin; Acide pipemidique; Acidum pipemidicum; pipeacid; uropimid; Uromidin; Pipemidate; Filtrax; Pipurin; Tractur; Urosten; Uroval; Pi-coli; 8-Ethyl-5,8-dihydro-5-oxo-2-(1-piperazinyl)pyrido(2,3-d)pyrimidine-6-carboxylic acid; Acido pipemidico [Spanish]; 1489 RB; RB 1489; Memento 400; PIPEMIDIC ACID ANHYDRO…	JOHZPMXAZQZXHR-UHFFFAOYSA-N	CHEMBL30116	PIPEMIDIC ACID	Others	Others	Antibacterial; Antibiotic; Others; Others	DNA gyrase	GYRA	Walsh C. "Molecular mechanisms that confer antibacterial drug resistance." Nature 406, (2000): 775-781	hsa03030	enzyme	Topoisomerase	Antibacterial
M92241	D	3	50	10	DMSO	63675-72-9	T0163	Nisoldipine	BAY-k 5552	COC(=O)C1=C(C)NC(=C(C1c1ccccc1[N+](=O)[O-])C(=O)OCC(C)C)C	C20H24N2O6	388.41	Immunology/Inflammation; Membrane transporter/Ion channel; Metabolism	Calcium Channel; ROS	Calcium Channel; Reactive Oxygen Species; L-type Cav1.2	Nisoldipine is a dihydropyridine calcium channel antagonist that acts as a potent arterial vasodilator and antihypertensive agent.	Morel N, et al. Br J Pharmacol, 1998, 125(5), 12005-12012.	4499	nisoldipine; 63675-72-9; Sular; Nisocor; Baymycard; Nisoldipin; Zadipina; Bay k 5552; 3-Isobutyl 5-methyl 2,6-dimethyl-4-(2-nitrophenyl)-1,4-dihydropyridine-3,5-dicarboxylate; Nisoldipinum; Nisoldipino; Syscor; Nisoldipinum [INN-Latin]; Nisoldipino [INN-Spanish]; Bay-k-5552; BAY-k 5552; Geomatrix 16e; Nisoldipine (stn); Sular (TN); CHEBI:76917; C20H24N2O6; Nisoldipine [USAN:BAN:INN:JAN]; EINECS 2…	VKQFCGNPDRICFG-UHFFFAOYSA-N	CHEMBL1726	NISOLDIPINE	Others	Others	Calcium Channel; ROS; Others; Others	Calcium Channel	CACNA1	https://www.ncbi.nlm.nih.gov/pmc/articles/PMC3174258/	hsa04020	Channel	Calcium_Channel	Calcium Channel
M92241	D	4	50	10	DMSO	115-46-8	T0318	Ataractan	Azacyclonol; Î³-pipradol; MER 17; MDL 4829	OC(C1CCNCC1)(c1ccccc1)c1ccccc1	C18H21NO	267.36	GPCR/G Protein; Neuroscience	5-HT Receptor	5-HT	Azacyclonol is a drug used to diminish hallucinations in psychotic individuals.	Raeissi SD, et al. Pharm Res, 1997, 14(8), 12019-1025.	15723	Azacyclonol; 115-46-8; diphenyl(piperidin-4-yl)methanol; alpha,alpha-diphenyl-4-piperidinomethanol; Frenquel; alpha-(4-Piperidyl)benzhydrol; alpha,alpha-Diphenyl-4-piperidinemethanol; Ataractan; gamma-Pipradol; 4-Piperidinemethanol, alpha,alpha-diphenyl-; Diphenyl(4-piperidinyl)methanol; Calmeran; Diphenyl-piperidin-4-yl-methanol; MER 17; Azaciclonolo [DCIT]; Azaciclonolo; Azacyclonolum; Frenoton…	ZMISODWVFHHWNR-UHFFFAOYSA-N	CHEMBL127508	AZACYCLONOL	Others	Others	5-HT Receptor; Others; Others	5-HT Receptor	HTR			G protein-coupled receptor	5-HT	5-HT Receptor
M92241	D	5	50	10	DMSO	34661-75-1	T0165	Urapidil	Ebrantil; Eupressyl; Mediatensyl	COc1ccccc1N1CCN(CCCNc2cc(=O)n(C)c(=O)n2C)CC1	C20H29N5O3	387.48	GPCR/G Protein; Neuroscience	5-HT Receptor; Adrenergic Receptor	5-HT Receptor; Adrenergic Receptor; 5-HT; Î±1-adrenergic receptor	Urapidil, a sympatholytic antihypertensive drug, acts as a 5-HT1A receptor agonist and as an Î±1-adrenoceptor antagonist.	Ramage AG. Br J Pharmacol. 1991 Apr;102(4):998-1002.	5639	urapidil; 34661-75-1; Ebrantil; Eupressyl; Mediatensyl; Uraprene; Urapidilum; Urapidilum [INN-Latin]; 6-[[3-[4-(2-Methoxyphenyl)-1-piperazinyl]propyl]amino]-1,3-dimethyluracil; NSC 310405; B-66256; C20H29N5O3; 6-[3-[4-(2-methoxyphenyl)piperazin-1-yl]propylamino]-1,3-dimethylpyrimidine-2,4-dione; EINECS 252-130-4; UNII-A78GF17HJS; NSC-310405; Urapidil [BAN:INN:JAN]; Urapidil [INN:BAN:JAN]; BRN 072…	ICMGLRUYEQNHPF-UHFFFAOYSA-N	CHEMBL279229	URAPIDIL	Others	Others	5-HT Receptor; Adrenergic Receptor; Others; Others	Adrenergic Receptor	ADR	Michel MC, de la Rosette JJ. "Treatment of hypertension with urapidil: a meta-analysis." European Journal of Clinical Pharmacology. 1994;46(5):405-11.	hsa04080	G protein-coupled receptor	Adrenergic_Receptor	5-HT Receptor
M92241	D	6	50	10	DMSO	27470-51-5	T0319	Suxibuzone	Calibene; Suxibuzona; Suxibuzonum	CCCCC1(COC(=O)CCC(=O)O)C(=O)N(N(C1=O)c1ccccc1)c1ccccc1	C24H26N2O6	438.47	Immunology/Inflammation; Neuroscience	COX	COX	Suxibuzone is a drug used for joint and muscular pain. It is a prodrug of the non steroidal anti inflammatory drug phenylbutazone, and is commonly used in horses.	Andrews FM, et al. Vet Ther. 2009 Fall;10(3):113-20.	5362	suxibuzone; 27470-51-5; Calibene; Suxibuzona; Suxibuzonum; Solurol; Flogos; 4-Hydroxymethylbutazolidine hemisuccinate; Aflogan; Flamilon; Alfide; 4-((4-Butyl-3,5-dioxo-1,2-diphenylpyrazolidin-4-yl)methoxy)-4-oxobutanoic acid; AE-17; Suxibuzonum [INN-Latin]; C24H26N2O6; Suxibuzona [INN-Spanish]; 4-Butyl-4-hydroxymethyl-1,2-diphenyl-3,5-pyrazolidinedione hydrogen succinate; CHEBI:32173; AE 17; Suxi…	ONWXNHPOAGOMTG-UHFFFAOYSA-N	CHEMBL1414320	SUXIBUZONE	Others	Others	COX; Others; Others	Cyclooxygenase (COX)	COX	Rainsford KD. "Profile and mechanisms of gastrointestinal and other side effects of nonsteroidal anti-inflammatory drugs (NSAIDs)." American Journal of Medicine, 1999; 107(6A): 27S-36S; discussion 36S-37S.	hsa00590 (Arachidonic acid metabolism)	Enzyme	COX	COX
M92241	D	7	50	10	DMSO	15500-66-0	T0166	Pancuronium bromide	Pancuronium dibromide; Pavulon	CC(=O)O[C@H]1C[C@@H]2CC[C@@H]3[C@@H]([C@]2(C[C@@H]1[N+]1(CCCCC1)C)C)CC[C@]1([C@H]3C[C@@H]([C@@H]1OC(=O)C)[N+]1(CCCCC1)C)C.[Br-].[Br-]	C35H60Br2N2O4	732.67	Neuroscience	AChR	AChR; mAChR; nAChR	Pancuronium dibromide, a competitive AChR antagonist (IC50 = 5.5 nM), acts as a skeletal muscle relaxant. Pancuronium dibromide blocking neuromuscular transmission is achieved by competing with acetylcholine for receptor sites on the motor end-plate.	LÃ¶wenick CV, et al. Eur J Pharmacol. 2001 Feb 9;413(1):31-5.	27350	PANCURONIUM BROMIDE; Pancuronium dibromide; 15500-66-0; Pavulon; Mioblock; ORG NA 97; Pancuronium (dibromide); Pancuronii bromidum; Bromuro de pancuronio; Bromure de pancuronium; bromurex; ORG-NA 97; CHEBI:7908; HSDB 3244; Pancuronii bromidum [INN-Latin]; EINECS 239-532-5; C35H60Br2N2O4; NSC 293162; UNII-U9LY9Y75X2; ORG-NA-97; 3alpha,17beta-Diacetoxy-2beta,16beta-dipiperidino-5alpha-androstane di…	NPIJXCQZLFKBMV-YTGGZNJNSA-L	CHEMBL1200757	PANCURONIUM BROMIDE	Others	Others	AChR; Others; Others	Nicotinic acetylcholine receptor	AChR	Bowman WC. "Neuromuscular block." British Journal of Pharmacology (2006) 147, S277-S286. https://bpspubs.onlinelibrary.wiley.com/doi/full/10.1038/sj.bjp.0706404	hsa04080	Ion channel	AChR	AChR
M92241	D	8	50	10	DMSO	64-86-8	T0320	Colchicine	Colchineos; Colchisol; Colcin	COc1cc2CC[C@H](NC(C)=O)c3cc(=O)c(OC)ccc3-c2c(OC)c1OC	C22H25NO6	399.44	Apoptosis; Autophagy; Cytoskeletal Signaling	Apoptosis; Autophagy; Microtubule Associated	microtubule; Microtubule/Tubulin; Autophagy; Apoptosis	Colchicine is a tubulin inhibitor (IC50: 3 nM) and blocks polymerization of microtubules by binding to tubulin.	Bonfoco E, et al. Colchicine induces apoptosis in cerebellar granule cells. Exp Cell Res. 1995 May;218(1):189-200.	6167	colchicine; 64-86-8; Colchisol; Colchineos; Colcin; Colchicinum; Colchicin; Colchicina; Condylon; Colsaloid; Colcrys; 7alphaH-Colchicine; Goutnil; Kolkicin; (S)-colchicine; (-)-colchicine; Colchysat; Mitigare; spindle poison; 7-alpha-H-Colchicine; Colchicine [JAN]; Colchicin [German]; Colchicina [Italian]; NSC 757; CCRIS 691; Colchcine; Colstat; NSC757; N-Acetyl trimethylcolchicinic acid methylet…	IAKHMKGGTNLKSZ-INIZCTEOSA-N	CHEMBL107	COLCHICINE	Others	Others	Apoptosis; Autophagy; Microtubule Associated; Others; Others	tubulin	TUB	https://pubmed.ncbi.nlm.nih.gov/17006537/	hsa04540	Microtubule Associated	Microtubule_Associated	Apoptosis
M92241	D	9	50	10	DMSO	77191-36-7	T0169	Nefiracetam	DZL-221; DM9384	Cc1cccc(C)c1NC(=O)CN1CCCC1=O	C14H18N2O2	246.31	Membrane transporter/Ion channel; Neuroscience	GABA Receptor	GABA Receptor; GABAR	Nefiracetam are underway in Phase 2 trials. Nefiracetam, a GABAergicã€_x0081_ cholinergicã€_x0081_and monoaminergic neuronal system enhancer, is used for Ro 5-4864-induced convulsions.	Shiotani T, et al. Brain Res, 2000, 859(2), 255-261.	71157	Nefiracetam; 77191-36-7; N-(2,6-dimethylphenyl)-2-(2-oxopyrrolidin-1-yl)acetamide; Translon; DM 9384; Nefiracetam [INN]; DMPPA; Nefiracetamum; Motiva; DM-9384; DZL-221; Nefiracetamum [INN-Latin]; N-(2,6-Dimethylphenyl)-2-oxo-1-pyrrolidineacetamide; 1-Pyrrolidineacetamide, N-(2,6-dimethylphenyl)-2-oxo-; CCRIS 6729; Nefiracetam (Translon); NSC-759830; BRN 6848330; UNII-1JK12GX30N; 2-Oxo-1-pyrrolidi…	NGHTXZCKLWZPGK-UHFFFAOYSA-N	CHEMBL260829	NEFIRACETAM	Others	Others	GABA Receptor; Others; Others	GABA Receptor	GABAR	Moriguchi S, Shioda N, Han F, et al. "Nefiracetam modulates acetylcholine receptor currents via two different signal transduction pathways." Molecular Pharmacology. 2013 Jan;83(1):251-8. doi: 10.1124/mol.112.081182	hsa04080	Ion channel	GABA	GABA Receptor
M92241	D	10	50	10	DMSO	31842-01-0	T0321	Indoprofen	(Â±)-Indoprofe	CC(C(=O)O)c1ccc(cc1)N1Cc2ccccc2C1=O	C17H15NO3	281.31	Immunology/Inflammation; Neuroscience	COX	COX	Indoprofen is a non-steroidal anti-inflammatory drug.	Lunn MR, et al. Chem Biol. 2004 Nov;11(11):1489-93.	3718	indoprofen; 31842-01-0; Isindone; Reumofene; Flosin; Flosint; 2-(4-(1-oxoisoindolin-2-yl)phenyl)propanoic acid; Indoprofene; Indoprofeno; Indoprofenum; Praxis; Bor-ind; K 4277; Indoprofene [INN-French]; Indoprofenum [INN-Latin]; Indoprofeno [INN-Spanish]; 2-(4-(1-Carboxyethyl)phenyl)-1-isoindolinone; p-(1-Oxo-2-isoindolinyl)hydratropic acid; EINECS 250-833-0; UNII-CPE46ZU14N; NSC-757065; CPE46ZU1…	RJMIEHBSYVWVIN-UHFFFAOYSA-N	CHEMBL15870	INDOPROFEN	Others	Others	COX; Others; Others	Cyclooxygenase	COX	https://www.sciencedirect.com/science/article/pii/S0024320505001281 (Lee, J.L., et al., "Indoprofen upregulates the survival motor neuron protein through a cyclooxygenase-independent mechanism." Life Sciences 76.11 (2005): 1191-1206.)	hsa00590 (Arachidonic acid metabolism)	Enzyme	COX	COX
M92241	D	12	50	10	DMSO	34161-24-5	T0322	Fipexide		Clc1ccc(OCC(=O)N2CCN(Cc3cc4c(OCO4)cc3)CC2)cc1	C20H21ClN2O4	388.85	GPCR/G Protein; Neuroscience	AChR; Dopamine Receptor	Adenylate Cyclase; Dopamine Transporter; Dopamine	Fipexide (Attentil, Vigilor), a psychoactive drug of the piperazine chemical class, was developed in Italy in 1983. It was served as a nootropic drug in France and Italy, mainly for the therapy of senile dementia, but is no longer in common use because of the occurrence of rare drug side-effects including hepatitis and fever.	Marino A, et al. Pharmacol Res. 1990 Mar-Apr;22(2):179-87.	3351	fipexide; 34161-24-5; Fipexidum; Fipexipa; 1-(2-[4-Chlorophenoxy]acetyl)-4-(3,4-methylenedioxybenzyl)piperazine; Fipexide [INN:DCF]; Fipexidum [INN-Latin]; Fipexipa [INN-Spanish]; UNII-TG44VME01D; TG44VME01D; 1-[4-(1,3-benzodioxol-5-ylmethyl)piperazin-1-yl]-2-(4-chlorophenoxy)ethanone; Fipexide (INN); EINECS 251-857-4; NSC-758407; FIPEXIDE [INN]; 1-((p-Chlorophenoxy)acetyl)-4-piperonylpiperazine;…	BFUJHVVEMMWLHC-UHFFFAOYSA-N	CHEMBL254857	FIPEXIDE	Others	Others	AChR; Dopamine Receptor; Others; Others	Dopamine Receptor	DR	Cornacchia, C., Cattabeni, F., Diomede, L. et al. "Fipexide, a new drug for the treatment of cognitive impairments in patients with senile dementia of Alzheimer type, enhances choline acetyltransferase activity in cultured rat septal neurons." Aging (Milano) 3, 199-206 (1991). https://doi.org/10.1007/BF03324069	hsa04080	G protein-coupled receptor	Dopamine	AChR
M92241	D	13	50	10	DMSO	849-55-8	T0173	Nylidrin hydrochloride	Buphenine HCl	Cl.CC(CCc1ccccc1)NC(C)C(O)c1ccc(O)cc1	C19H26ClNO2	335.87	GPCR/G Protein; Neuroscience	Adrenergic Receptor	Î²-adrenergic receptor	Nylidrin hydrochloride was an effective inhibitor of the IgG1-mediated release of histamine from passively sensitized guinea pig lung slices, and of the IgE-mediated release of histamine from passively sensitized rat peritoneal mast cells and human basophils.	Garetz FK, et al. J Am Geriatr Soc. 1979 May;27(5):235-6.	5702098	Nylidrin hydrochloride; 849-55-8; Buphenine hydrochloride; Dilatyl; Nylidrin (hydrochloride); Nylidrin HCl; Arlidin hydrochloride; Dilatol hydrochloride; Arlidin; Dilatol; NSC-142004; MLS000069387; SMR000058488; 4-[1-hydroxy-2-(4-phenylbutan-2-ylamino)propyl]phenol;hydrochloride; Nylidrin hydrochloride (JAN); EC69E3PW7E; C19H25NO2.ClH; NYLIDRIN HYDROCHLORIDE [JAN]; SR-01000002981; Buphenine HCl; …	CLJHABUMMDMAFA-UHFFFAOYSA-N	CHEMBL1204337	NYLIDRIN HYDROCHLORIDE	Others	Others	Adrenergic Receptor; Others; Others	Adrenergic Receptor	AR	National Center for Biotechnology Information (2023). PubChem Compound Summary for CID 4418, Nylidrin. Retrieved April 21, 2023, from https://pubchem.ncbi.nlm.nih.gov/compound/Nylidrin.	hsa04080	G protein-coupled receptor	Adrenergic_Receptor	Adrenergic Receptor
M92241	D	14	50	10	DMSO	68813-55-8	T0323	Oxantel Pamoate	Oxantel embonate	CN1CCCN=C1/C=C/c1cc(O)ccc1.OC(=O)c1c(Cc2c(C(=O)O)c(O)cc3ccccc23)c2c(cccc2)cc1O	C36H32N2O7	604.65	Microbiology/virology	Parasite	Antiparasitic; Parasite	Oxantel pamoate is used as an Antinematodal agent.	Keiser J, et al. Activity of oxantel pamoate monotherapy and combination chemotherapy against Trichuris muris and hookworms: revival of an old drug. PLoS Negl Trop Dis. 2013;7(3):e2119.	23760129	Prestwick3_000398; BSPBio_000615; BPBio1_000677; AKOS037515455; NCGC00180942-01	NDQCBGURNVGDMT-UETGHTDLSA-N			Others	Others	Parasite; Others; Others	Nicotinic acetylcholine receptor	nAChR	https://pubmed.ncbi.nlm.nih.gov/23507212/	hsa04080	Ligand-gated ion channel	AChR	Parasite
M92241	D	15	50	10	DMSO	2016-88-8	T0175	Amiloride hydrochloride	MK-870 hydrochloride; Amiloride HCl	NC(=N)NC(=O)c1c(N)nc(N)c(Cl)n1.Cl	C6H9Cl2N7O	266.09	Apoptosis; Membrane transporter/Ion channel; Proteases/Proteasome	Apoptosis; Serine Protease; Sodium Channel; TRP/TRPV Channel	Sodium Channel; TRP Channel; Apoptosis; uPA	Amiloride hydrochloride is an effective sodium channel blocker of epithelial.	Teiwes J, et al. Am J Hypertens, 2007, 20(1), 109-117.	16230	AMILORIDE HYDROCHLORIDE; 2016-88-8; Amiloride HCL; Amiloride chloride; Amiloride HCl anhydrous; Amiloride (hydrochloride); Amiloride hydrochloride anhydrous; MK-870 hydrochloride; Amiprazidine; CCRIS 5959; C6H8ClN7O.HCl; EINECS 217-958-2; Amiloride hydrochloride hydrate; N-Amidino-3,5-diamino-6-chloropyrazinecarboxamide hydrochloride; 3,5-diamino-N-carbamimidoyl-6-chloropyrazine-2-carboxamide hyd…	ACHKKGDWZVCSNH-UHFFFAOYSA-N	CHEMBL540851		Others	Others	Apoptosis; Serine Protease; Sodium Channel; TRP/TRPV Channel; Others; Others	Sodium Channel	SCNN1	https://www.ncbi.nlm.nih.gov/pmc/articles/PMC3690424/	hsa04724	Ion channel	Sodium_Channel	Apoptosis
M92241	D	16	50	10	DMSO	579-56-6	T0324	Isoxsuprine hydrochloride	Duvadilan; Isolait	Cl.CC(COC1=CC=CC=C1)NC(C)C(O)C1=CC=C(O)C=C1	C18H24ClNO3	337.84	GPCR/G Protein; Membrane Transporter/Ion Channel; Neuroscience	Adrenergic Receptor; iGluR	Adrenergic Receptor; iGluR; Î²-adrenergic receptor	Isoxsuprine hydrochloride is a beta-adrenergic agonist that causes direct relaxation of uterine and vascular smooth muscle.	Gozo EG Jr, Yebes RB. Chest. 1984 Nov;86(5):736-40.	11368	Isoxsuprine hydrochloride; 579-56-6; Duvadilan; Isoxsuprine HCl; Isolait; Suprilent; Vasotran; Vasoplex; Vasodilan; Isoxsuprin hydrochloride; 4-(1-Hydroxy-2-((1-phenoxypropan-2-yl)amino)propyl)phenol hydrochloride; Benzenemethanol,4-hydroxy-a-[1-[(1-methyl-2-phenoxyethyl)amino]ethyl]-, hydrochloride; MLS000028704; DTXSID1045328; vadosilan; EINECS 209-443-6; Isoxsuprine hydrochloride [USAN:JAN]; H…	QVPSGVSNYPRFAS-UHFFFAOYSA-N	CHEMBL559180	ISOXSUPRINE HYDROCHLORIDE	Others	Others	Adrenergic Receptor; iGluR; Others; Others	Adrenergic Receptor	ADR	https://www.sciencedirect.com/topics/medicine-and-dentistry/isoxsuprine	hsa04080	G protein-coupled receptor	Adrenergic_Receptor	Adrenergic Receptor
M92241	D	17	50	10	DMSO	5133-19-7	T0176	Isobarbaloin	aloin	O=C1C2=C(C=CC=C2O)[C@H]([C@H]3[C@@H]([C@H]([C@@H]([C@@H](CO)O3)O)O)O)C4=CC(CO)=CC(O)=C14	C21H22O9	418.39	Proteases/Proteasome	Tyrosinase	tyrosinase	Isobarbaloin (Aloin) is a natural anthracycline from Aloe vera, is a tyrosinase inhibitor.	Sun R , Zhai R , Ma C , et al. Combination of aloin and metformin enhances the antitumor effect by inhibiting the growth and invasion and inducing apoptosis and autophagy in hepatocellular carcinoma through PI3K/AKT/mTOR pathway[J]. Cancer Medicine, 2020, 9(3).	12305761	aloin; 1415-73-2; Aloin A; Barbaloin; Barbaloin A; CHEBI:2991; Aloin-A; Aloinum; DTXSID0045967; 648RW354S9; CHEMBL2103763; DTXCID8025967; UNII-648RW354S9; 1,8-Dihydroxy-3-hydroxymethyl-10-(6-hydroxymethyl-3,4,5-trihydroxy-2-pyranyl)anthrone; Aloin [BAN]; NSC-407305; (S)-1,8-dihydroxy-3-(hydroxymethyl)-10-((2S,3R,4R,5S,6R)-3,4,5-trihydroxy-6-(hydroxymethyl)tetrahydro-2H-pyran-2-yl)anthracen-9(10H)…	AFHJQYHRLPMKHU-OSYMLPPYSA-N	CHEMBL2103763		Others	Others	Tyrosinase; Others; Others	Tyrosinase	TYR	Choi, S., Lee, S.K., Kim, J.E., Chung, M.H., Park, Y.I. "Aloesin inhibits hyperpigmentation induced by UV radiation." Clinical and Experimental Dermatology, Vol 27, Issue 3, 2002, pp. 513-515.	hsa00350	Enzyme	Tyrosine_Kinase	Tyrosinase
M92241	D	17	50	10	DMSO	5133-19-7	T0176	Isobarbaloin	aloin	O=C1C2=C(C=CC=C2O)[C@H]([C@H]3[C@@H]([C@H]([C@@H]([C@@H](CO)O3)O)O)O)C4=CC(CO)=CC(O)=C14	C21H22O9	418.39	Proteases/Proteasome	Tyrosinase	tyrosinase	Isobarbaloin (Aloin) is a natural anthracycline from Aloe vera, is a tyrosinase inhibitor.	Sun R , Zhai R , Ma C , et al. Combination of aloin and metformin enhances the antitumor effect by inhibiting the growth and invasion and inducing apoptosis and autophagy in hepatocellular carcinoma through PI3K/AKT/mTOR pathway[J]. Cancer Medicine, 2020, 9(3).	12305761	aloin; 1415-73-2; Aloin A; Barbaloin; Barbaloin A; CHEBI:2991; Aloin-A; Aloinum; DTXSID0045967; 648RW354S9; CHEMBL2103763; DTXCID8025967; UNII-648RW354S9; 1,8-Dihydroxy-3-hydroxymethyl-10-(6-hydroxymethyl-3,4,5-trihydroxy-2-pyranyl)anthrone; Aloin [BAN]; NSC-407305; (S)-1,8-dihydroxy-3-(hydroxymethyl)-10-((2S,3R,4R,5S,6R)-3,4,5-trihydroxy-6-(hydroxymethyl)tetrahydro-2H-pyran-2-yl)anthracen-9(10H)…	AFHJQYHRLPMKHU-OSYMLPPYSA-N	CHEMBL2103763		Others	Others	Tyrosinase; Others; Others	Tyrosinase	TYR			Enzyme	Tyrosine_Kinase	Tyrosinase
M92241	D	18	50	10	DMSO	35543-24-9	T0317	Buflomedil hydrochloride	Buflomedil HCl; Fonzylane; Loftyl	Cl.COc1cc(OC)c(C(=O)CCCN2CCCC2)c(OC)c1	C17H26ClNO4	343.85	GPCR/G Protein; Neuroscience	Adrenergic Receptor	Î±-adrenergic receptor	Buflomedil hydrochloride, a vasodilator, is used in therapy of claudication or the symptoms of the peripheral arterial disease.	Ishitsuka Y, et al. J Pharmacol Sci,2009, 111(2), 211-215.	6420013	Buflomedil hydrochloride; Buflomedil HCl; 35543-24-9; Fonzylane; Loftyl; Buflomedil (hydrochloride); Bufedil; Irrodan; Buflocit; Buflan; Lofton; Irrodan R; UNII-3J944AFS8S; 4-(1-Pyrrolidinyl)-1-(2,4,6-trimethoxyphenyl)-1-butanone hydrochloride; 4-(pyrrolidin-1-yl)-1-(2,4,6-trimethoxyphenyl)butan-1-one hydrochloride; MLS000028735; 3J944AFS8S; DTXSID6046977; EINECS 252-611-9; NSC-759291; LL 1656; S…	ZDPACSAHMZADFZ-UHFFFAOYSA-N	CHEMBL1715107		Others	Others	Adrenergic Receptor; Others; Others	Adrenergic Receptor	ADR			G protein-coupled receptor	Adrenergic_Receptor	Adrenergic Receptor
M92241	D	19	50	10	DMSO	51-56-9	T0177	Homatropine Bromide	Homatropine hydrobromide	Br.CN1[C@H]2CC[C@@H]1C[C@@H](C2)OC(=O)C(O)c1ccccc1	C16H22BrNO3	356.26	Neuroscience	AChR	mAChR; mAChR (SHR-E); mAChR (WKY-E)	Homatropine Hydrobromide is the hydrobromide salt form of homatropine, a synthetic tertiary amine alkaloid with antimuscarinic properties. Homatropine, a competitive inhibitor of acetylcholine at the muscarinic receptor, blocks parasympathetic nerve stimulation. When applied topically to the eye, dilation of the pupil (mydriasis) and paralysis of accommodation (cycloplegia) result from the local …	Sim MK, et al. Clin Exp Hypertens, 1993, 15(2), 409-421.	6419941	HOMATROPINE HYDROBROMIDE; 51-56-9; homatropine bromide; Homatropine (Bromide); Homatropini hydrobromidum; Homatropine hydrobromide (R,S); Isopto Homatropine; UNII-BEW7469QZ0; (1R,3r,5S)-8-Methyl-8-azabicyclo[3.2.1]octan-3-yl 2-hydroxy-2-phenylacetate hydrobromide; BEW7469QZ0; DTXSID5045099; Homatropini bromidum; Homatropine hydrobromide [USP:JAN]; Benzeneacetic acid, a-hydroxy-,(3-endo)-8-methyl-…	DWSGTFTVBLXELC-MOTQWOLNSA-N			Others	Others	AChR; Others; Others	Muscarinic acetylcholine receptors	mAChR	PubChem Compound Summary for CID 5282401, Homatropine. https://pubchem.ncbi.nlm.nih.gov/compound/Homatropine	hsa04080	G protein-coupled receptor	AChR	AChR
M92241	D	20	50	10	DMSO	537-12-2	T0325	Diperodon hydrochloride	Diperocaine; Proctodon; Diothane hydrochloride	O=C(Nc1ccccc1)OCC(CN1CCCCC1)OC(=O)Nc1ccccc1.Cl	C22H28ClN3O4	433.93	Others	Others	Others	Diperodon is a local anaesthetics.	Calnan CD. Contact Dermatitis. 1980 Aug;6(5):367.	10830	DIPERODON HYDROCHLORIDE; 537-12-2; Proctodon; Diperocaine; Diperodon (hydrochloride); Diperodon HCl; Diothane hydrochloride; Diperdon hydrochloride; EINECS 208-659-8; NSC 76069; UNII-5YZ5R8I73Y; 5YZ5R8I73Y; DTXSID1045324; NSC-76069; 3-Piperidino-1,2-propanediol dicarbanilate hydrochloride; 3-(1-Piperidyl)-1,2-propanediol dicarbanilate hydrochloride; [2-(phenylcarbamoyloxy)-3-piperidin-1-ylpropyl]…	OWULVAZDMWJBLB-UHFFFAOYSA-N	CHEMBL1456312		Others	Others	Others; Others; Others						Others	Others
M92241	D	21	50	10	DMSO	945667-22-1	T0178	Saxagliptin hydrate	BMS-477118 hydrate; Onglyza hydrate	O.N[C@H](C(=O)N1[C@H]2C[C@H]2C[C@H]1C#N)C12CC3CC(CC(O)(C3)C1)C2	C18H25N3O2Â·H2O	333.43	Proteases/Proteasome; Ubiquitination	DPP-4; Proteasome	Dipeptidyl Peptidase; DPP-4	Saxagliptin is a selective and reversible DPP4 inhibitor (IC50: 26 nM; Ki: 1.3 nM).	Neumiller JJ, et al. Am J Health Syst Pharm. 2010, 67(18):1515-25.	53297473	Saxagliptin hydrate; 945667-22-1; saxagliptin monohydrate; Onglyza hydrate; Onglyza; Saxagliptin (hydrate); Saxagliptin [USAN]; UNII-9GB927LAJW; 9GB927LAJW; Saxagliptin [USAN:INN:BAN]; CHEBI:71271; BMS-477118-11; NSC-760407; (1S,3S,5S)-2-[(2S)-2-amino-2-(3-hydroxy-1-adamantyl)acetyl]-2-azabicyclo[3.1.0]hexane-3-carbonitrile;hydrate; BMS-477118 hydrate; Saxagliptin hydrate (JAN); (1S,3S,5S)-2-[(2S…	AFNTWHMDBNQQPX-NHKADLRUSA-N	CHEMBL2103745	SAXAGLIPTIN	Others	Others	DPP-4; Proteasome; Others; Others	dipeptidyl peptidase-4	DPP-4	https://www.accessdata.fda.gov/drugsatfda_docs/label/2009/022350lbl.pdf	hsa04612	protease	DPP	DPP-4
M92241	D	22	50	10	DMSO	147-24-0	T0330	Diphenhydramine hydrochloride	DPH; Diphenhydramine HCl	CN(CCOC(c1ccccc1)c1ccccc1)C.Cl	C17H22ClNO	291.82	GPCR/G Protein; Immunology/Inflammation; Neuroscience	Histamine Receptor	H1 receptor; Histamine Receptor	Diphenhydramine HCl (Benadryl) is a histamine H1 antagonist used as an antitussive and antiemetic. It is also used for pruritus and dermatoses, for hypersensitivity reactions, as an antiparkinson, a hypnotic, and as an ingredient in common cold preparations.	Kim YS, et al. Brain Res,2000, 881(2), 190-198.	8980	DIPHENHYDRAMINE HYDROCHLORIDE; 147-24-0; Diphenhydramine HCl; Dimedrol; Allergival; Bendylate; Carphenamine; Carphenex; Cathejell; Denydryl; Dibenil; Diphamine; Eldadryl; Fenylhist; Hydramine; Noctomin; Prodryl; Restamin; Silphen; Beldin; Belix; Diphen; Diphenhydramine.HCl; Felben; Bena; Benzantin; Dimedrolum; Halbmond; Histacyl; Paradryl; Sedopretten; Vicks Formula 44; Wehydryl; Allergan; Ambeny…	PCHPORCSPXIHLZ-UHFFFAOYSA-N	CHEMBL1620	DIPHENHYDRAMINE HYDROCHLORIDE	Others	Others	Histamine Receptor; Others; Others	Histamine H1 receptor	HRH1	https://www.ncbi.nlm.nih.gov/pmc/articles/PMC3443969/	hsa04080	G protein-coupled receptor	Histamine_Receptor	Histamine Receptor
M92241	E	3	50	10	DMSO	102-76-1	T0730	Triacetin	1,2,3-Triacetoxypropane; Glyceryl triacetate; Glycerol triacetate; Glycerin triacetate	CC(=O)OCC(COC(=O)C)OC(=O)C	C9H14O6	218.2	Metabolism; Microbiology/virology	Antifungal; Endogenous Metabolite	Antifungal; Fungal; Endogenous Metabolite	Triacetin is a triglyceride that is used as an antifungal agent.	Tsen AR, et al. Int J Y. 2014 Mar 15;134(6):1300-10.	5541	triacetin; 102-76-1; Glyceryl triacetate; Glycerol triacetate; Enzactin; Glycerin triacetate; Triacetine; Triacetylglycerol; Fungacetin; Glyped; Vanay; Triacetyl glycerine; Kesscoflex TRA; Kodaflex triacetin; 1,2,3-Propanetriol, triacetate; 1,2,3-triacetoxypropane; Acetin, tri-; Triacetina; Triacetinum; propane-1,2,3-triyl triacetate; 1,2,3-Propanetriol triacetate; Ujostabil; 1,2,3-Propanetriol, …	URAYPUMNDPQOKB-UHFFFAOYSA-N	CHEMBL1489254	TRIACETIN	Others	Others	Antifungal; Endogenous Metabolite; Others; Others	Endogenous Metabolite				Metabolite	Metabolite	Antifungal
M92241	E	4	50	10	DMSO	169590-42-5	T0466	Celecoxib	SC 58635	Cc1ccc(cc1)-c1cc(nn1-c1ccc(cc1)S(N)(=O)=O)C(F)(F)F	C17H14F3N3O2S	381.37	Immunology/Inflammation; Neuroscience	COX	COX; COX-2	Celecoxib is a Nonsteroidal Anti-inflammatory Drug. The mechanism of action of celecoxib is as a Cyclooxygenase Inhibitor.	Penning TD, et al. J Med Chem, 1997, 40(9), 1347-1365.	2662	celecoxib; 169590-42-5; Celebrex; Celebra; Onsenal; Celecox; Celocoxib; SC 58635; Xilebao; 184007-95-2; SC-58635; YM177; 4-[5-(4-METHYLPHENYL)-3-(TRIFLUOROMETHYL)-1H-PYRAZOL-1-YL]BENZENESULFONAMIDE; Celecoxib [USAN]; 4-[5-(4-methylphenyl)-3-(trifluoromethyl)pyrazol-1-yl]benzenesulfonamide; YM 177; HSDB 7038; Celecoxibum; p-(5-p-Tolyl-3-(trifluoromethyl)pyrazol-1-yl)benzenesulfonamide; Solexa; C17…	RZEKVGVHFLEQIL-UHFFFAOYSA-N	CHEMBL118	CELECOXIB	Others	Others	COX; Others; Others	Cyclooxygenase-2	COX-2	https://pubchem.ncbi.nlm.nih.gov/compound/Celecoxib	hsa00590	Enzyme	COX	COX
M92241	E	5	50	10	DMSO	104-46-1	T0014	cis-Anethol	Isoestragole; p-Propenylanisole; Anethole; Anise camphor; cis-Anethole; Cis-p-Propenylanisole	COc1ccc(C=CC)cc1	C10H12O	148.2	Others	Others	Others	Anethole is a type of aromatic compound that exists widely in nature, widely utilized as a seasoning substance.	Shimoni E, et al. J Biol Chem. 2002 Apr 5;277(14):11866-72.	7703	p-(1-Propenyl)anisole; 4-(1-propenyl)anisole; Methoxy-4-propenylbenzene; 1-(p-Methoxyphenyl)propene; CHEBI:2716; DTXSID4020086; MFCD00009284; 1-(4-Methoxyphenyl)-1(3)-propene; 1-Methoxy-4-[1-propenyl]benzene #; 50770-19-9; Spectrum_001629; SpecPlus_000644; Spectrum2_000538; Spectrum3_001109; Spectrum4_001950; KBioGR_002362; KBioSS_002109; 1-methoxy-4-propenyl-benzene; DivK1c_006740; SPBio_000555;…	RUVINXPYWBROJD-UHFFFAOYSA-N	CHEMBL3185908		Others	Others	Others; Others; Others						Others	Others
M92241	E	6	50	10	DMSO	550-99-2	T0446	Naphazoline hydrochloride	Naphazoline HCl; Albalon; Rhinantin	Cl.C(C1=NCCN1)c1cccc2ccccc12	C14H15ClN2	246.74	GPCR/G Protein; Neuroscience	Adrenergic Receptor	Adrenergic Receptor	Naphazoline hydrochloride is an adrenergic vasoconstrictor agent used as a decongestant.	Piletz JE, et al. J Pharmacol Exp Ther. 1996 Nov; 279(2):694-702.	11079	NAPHAZOLINE HYDROCHLORIDE; 550-99-2; NAPHAZOLINE HCL; Albalon; Rhinantin; Vasocon; Opcon; Albalon Liquifilm; Rhinoperd; Stricylon; Naphcon; Niazol; Rinofug; Naphcon forte; 2-(1-Naphthylmethyl)-2-imidazoline hydrochloride; Clera hydrochloride; Naphazoline chloride; Privine hydrochloride; Prizole hydrochloride; NAFAZAIR; Vasoclear; Coldan; Comfort Eye Drops; Degest-2; Naphazoliniumchlorid; Sanorin;…	DJDFFEBSKJCGHC-UHFFFAOYSA-N	CHEMBL1706	NAPHAZOLINE HYDROCHLORIDE	Others	Others	Adrenergic Receptor; Others; Others	Adrenergic Receptor	AR	https://www.ncbi.nlm.nih.gov/pmc/articles/PMC2699649/	hsa04080	G protein-coupled receptor	Adrenergic_Receptor	Adrenergic Receptor
M92241	E	7	50	10	DMSO	120-51-4	T0729	Benzyl benzoate	Benzoic acid benzyl ester; Ascabiol; Novoscabin; Scabitox	O=C(OCc1ccccc1)c1ccccc1	C14H12O2	212.24	Microbiology/virology	Parasite	Parasite	Benzyl benzoate is one of the older preparations used for the therapy of scabies. Scabies is a skin infection caused by the Sarcoptes scabiei. Its symptoms are red spots, severe itching (particularly at night), and may lead to a secondary infection. Benzyl benzoate is useful in the therapy of scabies because it is lethal to this mite. It is also used for the therapy of lice affection of the body …	Charles AK, et al. J Appl Toxicol. 2009, 29(5):422-434.	2345	BENZYL BENZOATE; 120-51-4; Ascabiol; Novoscabin; Benylate; Benzoic acid, benzyl ester; Benzoic acid benzyl ester; Scabiozon; Scabitox; Scobenol; Ascabin; Benzoic acid, phenylmethyl ester; Phenylmethyl benzoate; Benzyl phenylformate; Benzylets; Peruscabin; Colebenz; Scabagen; Scabanca; Vanzoate; Scabide; Venzonate; Benzyl benzenecarboxylate; benzylbenzoate; Antiscabiosum; Benzylis benzoas; Benzyl …	SESFRYSPDFLNCH-UHFFFAOYSA-N	CHEMBL1239	BENZYL BENZOATE	Others	Others	Parasite; Others; Others	Parasite		https://pubmed.ncbi.nlm.nih.gov/15879701/ "Benzyl benzoate: an effective topical treatment for scabies."		Antiparasitic	Parasite	Parasite
M92241	E	8	50	10	DMSO	80-49-9	T0427	Homatropine Methylbromide	Homatropine methobromide	C[N+]1(C)[C@@H]2CC[C@H]1C[C@@H](OC(=O)C(O)c1ccccc1)C2.[Br-]	C17H24BrNO3	370.29	Neuroscience	AChR	mAChR; mAChR (SHR-E); mAChR (WKY-E)	Homatropine Methylbromide is the methyl bromide salt of homatropine, a synthetic tertiary amine alkaloid with antimuscarinic properties.	Sim MK, et al. Clin Exp Hypertens, 1993, 15(2), 409-421.	10429215	homatropine methylbromide; 80-49-9; Equipin; Homatropine (methylbromide); Arkitropin; Homapin; Homatropine methyl bromide; Camatropine; Homatromide; Novatropine; Malcotran; Mesopin; Novatrin; Novatrine; Esopin; Sethyl; Sed-Tems; UNII-68JRS2HC1C; 68JRS2HC1C; Homatropine methobromide; Methylhomatropine bromide; Homatropini methylbromidum; Homapin-5; Homapin-10; NSC-34399; NSC-757048; Homatropine me…	FUFVKLQESJNNAN-ZZJGABIISA-M			Others	Others	AChR; Others; Others	Muscarinic acetylcholine receptors	mAChR	https://www.ncbi.nlm.nih.gov/pmc/articles/PMC3443967/	hsa04080	G protein-coupled receptor	AChR	AChR
M92241	E	9	50	10	DMSO	123-82-0	T0359	2-Aminoheptane	2-Heptylamine; 1-Methylhexylamine; Tuaminoheptanez; Tuamine; Heptamine	CCCCCC(C)N	C7H17N	115.22	Others	Others	Others	2-Aminoheptane is used for proteomics research.	COMER JP, KENNEDY EE. J Am Pharm Assoc Am Pharm Assoc (Baltim). 1956 Jul;45(7):454-5.	5603	2-AMINOHEPTANE; tuaminoheptane; 123-82-0; 2-Heptylamine; 2-Heptanamine; heptan-2-amine; 1-Methylhexylamine; Heptamine; Tuamine; Heptin; Heptedrine; Tuaminoheptan; Rineptil; Rineptyl; Methyl-n-hexylamine; Armeen L-7; Tuaminheptanum; Tuaminoheptanum; sec-Heptanamine; DL-2-Aminoheptan; (RS)-2-Heptylamin; Tuaminoheptanez; Tuaminoheptano; Hexylamine, 1-methyl-; Heptamine (sympathomimetic); Tuaminohept…	VSRBKQFNFZQRBM-UHFFFAOYSA-N	CHEMBL123693	TUAMINOHEPTANE	Others	Others	Others; Others; Others						Others	Others
M92241	E	10	50	10	DMSO	84-22-0	T0397	Tetryzoline	Tetrahydrozoline; Tetryzolin	C1CN=C(N1)C1CCCc2ccccc12	C13H16N2	200.28	GPCR/G Protein; Neuroscience	Adrenergic Receptor	Adrenergic Receptor; Î±-adrenergic receptor	Tetrahydrozoline, an alpha agonist, have an effect on the constriction of conjunctival blood vessels. This contributes to relieve the redness of the eye resulted from minor ocular irritants.	DahlstrÃ¶m M, et al. J Exp Zool A Comp Exp Biol. 2005 Jul 1;303(7):551-62.	5419	tetrahydrozoline; Tetryzoline; 84-22-0; Tetryzolin; Tyzanol; 2-(1,2,3,4-tetrahydronaphthalen-1-yl)-4,5-dihydro-1H-imidazole; Tetryzolinum; Caltheon; Tetrahydrozolinum; 2-(1,2,3,4-Tetrahydro-1-naphthyl)-2-imidazoline; Tetrizolina; Tetryzolinum [INN-Latin]; Tetrizolina [INN-Spanish]; (-)-Tetrahydrozoline; Tetryzoline, (-)-; 1H-Imidazole, 4,5-dihydro-2-(1,2,3,4-tetrahydro-1-naphthalenyl)-; HSDB 7471…	BYJAVTDNIXVSPW-UHFFFAOYSA-N	CHEMBL1266	TETRAHYDROZOLINE	Others	Others	Adrenergic Receptor; Others; Others	Alpha-adrenergic receptor	ADRA	https://pubchem.ncbi.nlm.nih.gov/compound/Tetryzoline#section=Pharmacology-and-Biochemistry	hsa04080	G protein-coupled receptor	Adrenergic_Receptor	Adrenergic Receptor
M92241	E	11	50	10	DMSO	127-47-9	T0685	Retinyl acetate	Vitamin A acetate; Retinol acetate; Retinyl (Retinol) Acetate	CC(=O)OC/C=C(\C)/C=C/C=C(\C)/C=C/C1=C(C)CCCC1(C)C	C22H32O2	328.5	Metabolism	Vitamin	VA	Vitamin A is a group of unsaturated nutritional hydrocarbons, that contains retinal, retinol, retinoic acid, and several provitamins A carotenoids, among which beta-carotene is the most important.	Stephensen CB, et al. Annu Rev Nutr, 2001, 21, 167-192.	638034	RETINYL ACETATE; Vitamin A acetate; Retinol acetate; 127-47-9; Retinol, acetate; all-trans-Retinyl acetate; Crystalets; Myvak; Myvax; Vitamin A1 acetate; all-trans-Retinol acetate; Vitamin A alcohol acetate; Davitan A 650; Vitamin A ester; all-trans-Vitamin A acetate; Retinol, acetate, all-trans-; Myvak (VAN); Myvax (VAN); O~15~-acetylretinol; all-trans-Retinylacetate; Vitamin A acetate (VAN); Ac…	QGNJRVVDBSJHIZ-QHLGVNSISA-N	CHEMBL486193	RETINYL ACETATE	Others	Others	Vitamin; Others; Others	Retinoic acid receptors (RARs) and Retinoid X receptors (RXRs)	RAR/RXR	https://www.ncbi.nlm.nih.gov/pmc/articles/PMC3972921/	hsa03320	Nuclear receptor	Retinoic_Acid	Vitamin
M92241	E	12	50	10	DMSO	144143-96-4	T2531	Eprosartan Mesylate	SKF-108566J	s1c(C/C(=C\c2n(c(nc2)CCCC)Cc2ccc(cc2)C(=O)O)/C(=O)O)ccc1.S(=O)(=O)(O)C	C23H24N2O4SÂ·CH4O3S	520.62	Endocrinology/Hormones	RAAS	Angiotensin Receptor; AT1 receptor	Eprosartan is a competitive and reversible Angiotensin II Receptor Blocker.	Plosker GL, et al. Drugs, 2000, 60(1), 177-201.	5282474	EPROSARTAN MESYLATE; 144143-96-4; Teveten; Eprosartan mesilate; eprosartan methanesulfonate; Eprosartan (mesylate); Eprosartan Monomethanesulfonate; SK&F 108566-J; Eprosartan mesylate [USAN:BAN]; SK&F-108566-J; UNII-8N2L1NX8S3; Epro-sartan mesylate dihydrate; 8N2L1NX8S3; DTXSID7044217; CHEBI:48409; C23H24N2O4S.CH4O3S; (E)-2-Butyl-1-(p-carboxybenzyl)-alpha-2-thenylimidazole-5-acrylic acid, monomet…	DJSLTDBPKHORNY-XMMWENQYSA-N	CHEMBL1200987	EPROSARTAN MESYLATE	Others	Others	RAAS; Others; Others	Angiotensin II receptor type 1 (AT1)	AGTR1	https://www.ncbi.nlm.nih.gov/pmc/articles/PMC3874171/	hsa04614	G protein-coupled receptor	AT_Receptor	RAAS
M92241	E	13	50	10	DMSO	140-82-9	T0576	Diethylaminoethoxyethanol		CCN(CCOCCO)CC	C8H19NO2	161.24	Others	Others	Others	Diethylaminoethoxyethanol is served in the production of cough medicine Toclase and so on.	CUTLER A, et al. Endocrinology. 1961 Sep;69:473-82.	67327	140-82-9; 2-(2-Diethylaminoethoxy)ethanol; 2-(2-(Diethylamino)ethoxy)ethanol; 2-[2-(Diethylamino)ethoxy]ethanol; Diethylaminoethoxyethanol; 6-Ethyl-3-oxa-6-azaoctanol; Ethanol, 2-[2-(diethylamino)ethoxy]-; 2-(2-Diethylaminoethoxy)-ethanol; 2-(beta-(Diethylamino)ethoxy)ethanol; NSC 163322; 2-[2-(diethylamino)ethoxy]ethan-1-ol; EINECS 205-436-7; Ethanol, 2-(2-(diethylamino)ethoxy)-; N,N-Diethyletho…	VKBVRNHODPFVHK-UHFFFAOYSA-N			Others	Others	Others; Others; Others						Others	Others
M92241	E	14	50	10	DMSO	1977-09-08	T0017	Phenolphthalein	Phthalimetten; Euchessina; Phthalin	Oc1ccc(cc1)C1(OC(=O)c2ccccc12)c1ccc(O)cc1	C20H14O4	318.33	Others	Others	Others	Phenolphthalein is an acid-base indicator which is colorless in acid solution, but turns pink to red as the solution becomes alkaline. It is used medicinally as a cathartic.	Uesawa Y, et al. Arch Toxicol. 2007 Mar;81(3):163-8.	4764	phenolphthalein; 77-09-8; Phthalimetten; Euchessina; Phthalin; Espotabs; Phenolax; Purgophen; Koprol; Laxogen; Trilax; Purga; Spulmako-lax; Purgen; Chocolax; Medilax; Colax; Laxin; FemiLax; Dihydroxyphthalophenone; 3,3-Bis(4-hydroxyphenyl)phthalide; 3,3-Bis(4-hydroxyphenyl)-1(3H)-isobenzofuranone; Fenolftalein; Phenolphtaleine; Correctol; Alophen; 3,3-Bis(p-hydroxyphenyl)phthalide; Phillips Gelca…	KJFMBFZCATUALV-UHFFFAOYSA-N	CHEMBL63857	PHENOLPHTHALEIN	Others	Others	Others; Others; Others						Others	Others
M92241	E	15	50	10	DMSO	14508-49-7	T2193	2-Chloropyrazine		c1cnc(cn1)Cl	C4H3ClN2	114.53	Cell Cycle/Checkpoint	CDK	CDK2	2-Chloropyrazine is used in chemical industry.	BÃ©gouin JM, Gosmini C. J Org Chem. 2009 Apr 17;74(8):3221-4.	73277	2-Chloropyrazine; 14508-49-7; Chloropyrazine; Pyrazine, chloro-; 2-chloro-pyrazine; pyrazine, 2-chloro-; MFCD00006124; EINECS 238-517-0; chioropyrazine; chloropyrazin; chloro-pyrazine; 6-chloropyrazine; 2- chloropyrazine; 2-chloro pyrazine; Prestwick0_001087; Prestwick1_001087; Prestwick2_001087; Prestwick3_001087; 2-Chloropyrazine, 97%; SCHEMBL6771; BSPBio_001134; SPBio_003027; BPBio1_001248; CH…	GELVZYOEQVJIRR-UHFFFAOYSA-N	CHEMBL1741693		Others	Others	CDK; Others; Others						CDK	CDK
M92241	E	16	50	10	DMSO	59-47-2	T0015	Mephenesin	Decontractyl; Cresoxydiol; Memphenesin; Mephedan	Cc1ccccc1OCC(O)CO	C10H14O3	182.22	Membrane Transporter/Ion Channel; Neuroscience	iGluR; NMDAR	iGluR; NMDAR	Mephenesin is a centrally acting muscle relaxant with a short duration of action.	Prescrire Int. 2013 May;22(138):127-8.	4059	mephenesin; 59-47-2; Cresoxydiol; Decontractyl; Memphenesin; Mephenesine; Mephedan; Lissephen; Tolserol; Anatensin; Cresodiol; Decontractil; Dioloxol; Lissenphan; Mefenesina; Mephelor; Mephesin; Myodetensin; Myodetensine; Atensin; Curaril; Sinan; Kresoxypropandiol; Cresoxypropanediol; 3-(2-Methylphenoxy)propane-1,2-diol; Cresossidiolo; Curarythan; Seconesinz; Spartoloxin; Spartoloxyn; Curythan; D…	JWDYCNIAQWPBHD-UHFFFAOYSA-N	CHEMBL229128	MEPHENESIN	Others	Others	iGluR; NMDAR; Others; Others						iGluR	iGluR
M92241	E	17	50	10	DMSO	151-67-7	T0954	Anestan	Halothane; Narcotane	FC(F)(F)C(Cl)Br	C2HBrClF3	197.39	Membrane transporter/Ion channel; Neuroscience	Chloride channel; GABA Receptor; NMDAR; Potassium Channel	Glycine receptor; GABAR; NMDA receptor; Potassium Channel	Halothane is a nonflammable, halogenated, hydrocarbon anesthetic that provides relatively rapid induction with little or no excitement. Analgesia may not be adequate. NITROUS OXIDE is often given concomitantly. Because halothane may not produce sufficient muscle relaxation, supplemental neuromuscular blocking agents may be required.	Namba T, et al. Eur J Pharmacol. 2000 Apr 28;395(2):95-101.	3562	halothane; 151-67-7; Fluothane; 2-BROMO-2-CHLORO-1,1,1-TRIFLUOROETHANE; Narcotane; Rhodialothan; Anestan; Narcotan; Bromochlorotrifluoroethane; Phthorothanum; Fluorotane; Ftorotan; Ftuorotan; Halothan; Fluktan; Halotan; Narkotan; Halan; Halsan; Chalothane; Halotano; Freon 123B1; Halothanum; Alotano; Bromchlortrifluoraethanum; Ftorotan [Russian]; Alotano [DCIT]; 1,1,1-Trifluoro-2-chloro-2-bromoeth…	BCQZXOMGPXTTIC-UHFFFAOYSA-N	CHEMBL931	HALOTHANE	Others	Others	Chloride channel; GABA Receptor; NMDAR; Potassium Channel; Others; Others	Chloride channel	CLC			Ion channel	Chloride_Channel	Chloride channel
M92241	E	18	50	10	DMSO	630-93-3	T0008	Phenytoin sodium	5,5-Diphenylhydantoin sodium salt; Diphenylhydantoin Sodium; Dilantin sodium; Diphantoine	[Na+].O=C1NC(C(=O)[N-]1)(c1ccccc1)c1ccccc1	C15H11N2NaO2	274.25	Membrane transporter/Ion channel; Microbiology/virology	Sodium Channel; Virus Protease	Sodium Channel; Virus Protease	Phenytoin sodium is an inactive stabilizer for voltage-gated sodium channel .	Lenkowski PW, et al. Eur J Pharm Sci. 2004 Apr;21(5):635-44.	657302	PHENYTOIN SODIUM; 630-93-3; 5,5-Diphenylhydantoin sodium salt; Dilantin sodium; Diphenylhydantoin Sodium; Diphantoine; Tacosal; Antisacer; Citrullamon; Fenidantoin; Novodiphenyl; Aladdin; Alepsin; Cumatil; Decatona; Derizene; Dihydan; Ditomed; Enkefal; Epdantoin; Epileptin; Epsolin; Eptolin; Fenigramon; Fenitron; Fenytoin; Hidantin; Phenilep; Phenytoin sodium salt; Ditoin; Episar; Muldis; Fenitoi…	FJPYVLNWWICYDW-UHFFFAOYSA-M	CHEMBL1611	PHENYTOIN SODIUM	Others	Others	Sodium Channel; Virus Protease; Others; Others	Sodium Channel	NaV	https://www.ncbi.nlm.nih.gov/pmc/articles/PMC101033/	hsa04020	Ion channel	Sodium_Channel	Sodium Channel
M92241	E	19	50	10	DMSO	2809-21-4	T0308	Etidronate	HEDP; Etidronic acid; HEDPA	CC(O)(P(=O)(O)O)P(=O)(O)O	C2H8O7P2	206.03	Apoptosis; Microbiology/virology	Apoptosis; HBV	Apoptosis; HAP; PTPase S; V-type proton ATPase catalytic subunit	Etidronic is a diphosphonate which affects calcium metabolism. It inhibits ectopic calcification and slows down bone resorption and bone turnover.	Hiroi-Furuya E, et al. Calcif Tissue Int, 1999, 64(3), 219-223.	3305	Etidronic acid; 2809-21-4; etidronate; 1-Hydroxyethylidene-1,1-diphosphonic acid; HEDP; EHDP; Etidronsaeure; Acetodiphosphonic acid; Hydroxyethanediphosphonic acid; Turpinal SL; Oxyethylidenediphosphonic acid; Dequest 2015; Dequest Z 010; Phosphonic acid, (1-hydroxyethylidene)bis-; Acido etidronico; Ferrofos 510; Acide etidronique; 1-Hydroxyethane-1,1-diphosphonic acid; Diphosphonate (base); Dequ…	DBVJJBKOTRCVKF-UHFFFAOYSA-N	CHEMBL871	ETIDRONIC ACID	Others	Others	Apoptosis; HBV; Others; Others	Farnesyl pyrophosphate synthase (FPPS)	FDPS	Russell RG. "Bisphosphonates: the first 40 years." Bone 49.1 (2011): 2-19. https://www.sciencedirect.com/science/article/pii/S8756328211001079	hsa00900	Enzyme	Farnesyl_synthase	Apoptosis
M92241	E	20	50	10	DMSO	29122-68-7	T0007	Atenolol	(RS)-Atenolol; Tenormin; Normiten; Blokium	CC(C)NCC(O)COc1ccc(CC(=O)N)cc1	C14H22N2O3	266.34	GPCR/G Protein; Neuroscience	Adrenergic Receptor	Adrenergic Receptor; Î²1-adrenergic receptor; Î²2-adrenergic receptor	Atenolol is a selective Î²1 receptor antagonist.	Nuttall SL, et al. J Clin Pharm Ther. 2003 Jun;28(3):179-86.	2249	atenolol; 29122-68-7; Tenormin; Prenormine; Tenormine; Blokium; Myocord; Normiten; (RS)-Atenolol; Duraatenolol; Betacard; Corotenol; Atehexal; Betablok; Cuxanorm; Juvental; Selobloc; Tenoblock; Antipressan; Atenblock; Farnormin; Internolol; Premorine; Vericordin; Anselol; Atcardil; Atecard; Atendol; Atereal; Evitocor; Hypoten; Ibinolo; Lotenal; Normalol; Prenolol; Stermin; Tenidon; Tenolol; Tenop…	METKIMKYRPQLGS-UHFFFAOYSA-N	CHEMBL24	ATENOLOL	Others	Others	Adrenergic Receptor; Others; Others	Beta-1 adrenergic receptor	ADRB1	https://www.ncbi.nlm.nih.gov/pmc/articles/PMC151088/	hsa04080	Receptor	Adrenergic_Receptor	Adrenergic Receptor
M92241	E	21	50	10	DMSO	29976-53-2	T1340	N-Carbethoxy-4-piperidone		CCOC(=O)N1CCC(=O)CC1	C8H13NO3	171.19	Others	Others	Others	N-Carbethoxy-4-piperidone is an aminopyrimidine derivative, compositions containing them and there served as pharmaceuticals.	Eric Gundersen et al.Bioorganic & Medicinal Chemistry Letters, 15(7), 1891-1894 (2005)	34767	N-Carbethoxy-4-piperidone; 29976-53-2; Ethyl 4-oxopiperidine-1-carboxylate; Ethyl 4-oxo-1-piperidinecarboxylate; N-Carboethoxy-4-piperidone; 1-Ethoxycarbonyl-4-piperidone; 1-Carbethoxy-4-piperidone; 1-Piperidinecarboxylic acid, 4-oxo-, ethyl ester; 4-Oxo-1-piperidinecarboxylic acid ethyl ester; 1-(Ethoxycarbonyl)-4-piperidone; MFCD00006188; N-Ethoxycarbonyl-4-piperidone; 1-Ethoxycarbonyl-4-piperi…	LUBGFMZTGFXIIN-UHFFFAOYSA-N			Others	Others	Others; Others; Others						Others	Others
M92241	E	22	50	10	DMSO	7220-79-3	T0006	Methylene Blue trihydrate	Methylene Blue; Basic blue 9; Methylthionine chloride	O.O.O.[Cl-].CN(C)c1ccc2nc3cc\c(cc3sc2c1)=[N+](/C)C	C16H24ClN3O3S	373.9	Cytoskeletal Signaling; GPCR/G Protein; Immunology/Inflammation; Microbiology/virology; Neuroscience	Guanylate cyclase; Microtubule Associated; monoamine oxidase; NO Synthase; Parasite	Guanylate Cyclase; Monoamine Oxidase; NO Synthase; Parasite; Tau aggregation	Methylene blue is a compound consisting of dark green crystals or crystalline powder, having a bronze-like luster. Solutions in water or alcohol have a deep blue color. Methylene blue is used as a bacteriologic stain and as an indicator. It inhibits soluble guanylyl cyclase and has been used to treat cyanide poisoning and to lower levels of methemoglobin. It also inhibits tau filament formation (…	Rager T, et al. Phys Chem Chem Phys. 2012 Jun 14;14(22):8074-82.	104827	Methylene Blue trihydrate; 7220-79-3; C.I. Basic Blue 9 trihydrate; Methylthionine chloride; Phenothiazin-5-ium, 3,7-bis(dimethylamino)-, chloride, trihydrate; Basic Blue 9 trihydrate; 3,7-Bis(dimethylamino)phenothiazin-5-ium chloride trihydrate; 7220-79-3 (hdyrate); C.I. Basic Blue 9, trihydrate; Methylene Blue [USAN]; CCRIS 9312; DTXSID0025600; UNII-T42P99266K; T42P99266K; methylthioninium chlo…	XQAXGZLFSSPBMK-UHFFFAOYSA-M	CHEMBL550495	METHYLENE BLUE	Others	Others	Guanylate cyclase; Microtubule Associated; monoamine oxidase; NO Synthase; Parasite; Others; Others	Guanylate cyclase, Monoamine oxidase	GC, MAO	Schirmer RH, Adler H, Pickhardt M, Mandelkow E. "Lest we forget you - methylene blue...". Neurobiology of Aging 32.12 (2011): 2325.e7-2325.e16	hsa04020 (for Guanylate cyclase), hsa00260 (for Monoamine oxidase)	enzyme	Guanylate_cyclase	Guanylate cyclase
M92241	F	3	50	10	DMSO	82034-46-6	T0181	Loteprednol etabonate	Lotemax; Alrex	CCOC(=O)O[C@@]1(CC[C@@H]2[C@@]1(C[C@@H]([C@H]1[C@H]2CCC2=CC(=O)C=C[C@]12C)O)C)C(=O)OCCl	C24H31ClO7	466.95	Endocrinology/Hormones; Microbiology/virology	Antibacterial; Antibiotic; Glucocorticoid Receptor	Bacterial; Antibiotic; Glucocorticoid Receptor	Loteprednol Etabonate is an ophthalmic analog of the corticosteroid prednisolone with anti-inflammatory activity.	Druzgala P, et al. J Steroid Biochem Mol Biol,1991, 38(2), 149-154.	444025	Loteprednol etabonate; 82034-46-6; Lotemax; Alrex; HGP-1; Inveltys; CDDD-5604; P-5604; Loterox; Locort; Lotemax (TN); CHEBI:31784; CDDD 5604; chloromethyl (8S,9S,10R,11S,13S,14S,17R)-17-ethoxycarbonyloxy-11-hydroxy-10,13-dimethyl-3-oxo-7,8,9,11,12,14,15,16-octahydro-6H-cyclopenta[a]phenanthrene-17-carboxylate; UNII-YEH1EZ96K6; YEH1EZ96K6; DTXSID2046468; KPI-121; Loteprednol etabonate (JAN/USAN); …	DMKSVUSAATWOCU-HROMYWEYSA-N	CHEMBL1200865	LOTEPREDNOL ETABONATE	Others	Others	Antibacterial; Antibiotic; Glucocorticoid Receptor; Others; Others	Glucocorticoid Receptor	GR	https://www.ncbi.nlm.nih.gov/pmc/articles/PMC2778472/	hsa04145	Receptor	Glucocorticoid_Receptor	Antibacterial
M92241	F	4	50	10	DMSO	186826-86-8	T0331	Moxifloxacin hydrochloride	BAY-128039; Moxifloxacin HCl; BAY12-8039 HCl	COc1c2c(cc(c1N1C[C@@H]3CCCN[C@@H]3C1)F)c(=O)c(cn2C1CC1)C(=O)O.Cl	C23H29ClFN3O4	437.89	DNA Damage/DNA Repair; Microbiology/virology	Antibacterial; Antibiotic; Topoisomerase	Bacterial; Antibiotic; Topo II; Topo IV	Moxifloxacin is a fourth generation fluoroquinolone with expanded activity against gram-positive bacteria as well as atypical pathogens. Moxifloxacin has been linked to mild ALT elevations during therapy and to rare instances of idiosyncratic acute liver injury with symptoms and jaundice.	Tuberculosis (Edinb), 2008, 88(2):127-131.	101526	Moxifloxacin hydrochloride; 186826-86-8; Moxifloxacin HCl; Avelox; Vigamox; Avalox; BAY 12-8039; Moxifloxacin (Hydrochloride); Bay-12-8039; Actira; Izilox; MFLX; CHEBI:7008; Moxifloxacin (as hydrochloride); DTXSID4045921; Moxifloxacin hydrochloride [USAN]; UNII-C53598599T; AL-15469A; BAY12-8039; NSC-758875; (4aS-cis)-1-Cyclopropyl-6-fluoro-1,4-dihydro-8-methoxy-7-(octahydro-6H-pyrrolol(3,4-b)pyri…	IDIIJJHBXUESQI-DFIJPDEKSA-N	CHEMBL1200735	MOXIFLOXACIN HYDROCHLORIDE	Others	Others	Antibacterial; Antibiotic; Topoisomerase; Others; Others	Topoisomerase II (DNA gyrase) and Topoisomerase IV	GYR/ParC	https://www.ncbi.nlm.nih.gov/pmc/articles/PMC90423/	hsa03030	Enzyme	Topoisomerase	Antibacterial
M92241	F	5	50	10	DMSO	68497-62-1	T0183	Pramiracetam	CI-879	CC(C)N(CCNC(=O)CN1CCCC1=O)C(C)C	C14H27N3O2	269.38	Others	Others	Others	Pramiracetam, derived from piracetam, is a more effective nootropic drug . According to reports, Pramiracetam improved cognitive defects related with traumatic brain wounds. Pramiracetam was also potent in the therapy of cognitive disorders of traumatic origins and cerebrovascular.	Corasaniti MT, et al. Funct Neurol. 1995 May-Jun;10(3):151-5.	51712	pramiracetam; 68497-62-1; amacetam; Pramiracetam [INN]; Pramiracetamum; N-[2-[di(propan-2-yl)amino]ethyl]-2-(2-oxopyrrolidin-1-yl)acetamide; N-(2-(diisopropylamino)ethyl)-2-(2-oxopyrrolidin-1-yl)acetamide; Pramiracetamum [INN-Latin]; 1-Pyrrolidineacetamide, N-(2-(bis(1-methylethyl)amino)ethyl)-2-oxo-; Vinpotropil; UNII-4449F8I3LE; 4449F8I3LE; C14H27N3O2; Neupramir; Pramistar; Pramiracetam (INN); …	ZULJGOSFKWFVRX-UHFFFAOYSA-N	CHEMBL159776	PRAMIRACETAM	Others	Others	Others; Others; Others						Others	Others
M92241	F	6	50	10	DMSO	72432-10-1	T0333	Aniracetam	Ro 13-5057	COc1ccc(cc1)C(=O)N1CCCC1=O	C12H13NO3	219.24	GPCR/G Protein; Membrane Transporter/Ion Channel; Neuroscience	5-HT Receptor; AChR; Dopamine Receptor; GluR; iGluR	5-HT; Dopamine; AMPA; GluR; nAChR; iGluR	Aniracetam(Ro 13-5057), a nootropic and neuroprotective drug, selectively modulates the AMPA receptor and nAChR.	Nakamura K, Kurasawa M. Eur J Pharmacol. 2001 May 18;420(1):33-43.	2196	aniracetam; 72432-10-1; Draganon; Sarpul; 1-(4-Methoxybenzoyl)-2-pyrrolidinone; 1-(4-methoxybenzoyl)pyrrolidin-2-one; Ampamet; Ro 13-5057; 1-p-Anisoyl-2-pyrrolidinone; Aniracetamun; Memodrin; Ro-13-5057; 1-anisoyl-2-pyrrolidinone; Aniracetamun [INN-Latin]; 1-p-anisoylpyrrolidin-2-one; 1-[(4-methoxyphenyl)carbonyl]pyrrolidin-2-one; Aniracetam [USAN:INN:JAN]; NSC-758223; Ro 135057; BRN 4807205; 2-P…	ZXNRTKGTQJPIJK-UHFFFAOYSA-N	CHEMBL36994	ANIRACETAM	Others	Others	5-HT Receptor; AChR; Dopamine Receptor; GluR; iGluR; Others; Others	AMPA receptor	GluR	https://www.ncbi.nlm.nih.gov/pmc/articles/PMC3814823/	hsa04724	Ionotropic glutamate receptor	AMPA_Receptor	5-HT Receptor
M92241	F	7	50	10	DMSO	78613-38-4	T0187	Amorolfine hydrochloride	Amorolfin; Ro 14-4767/002; Amorolfine HCl	Cl.CCC(C)(C)c1ccc(CC(C)CN2C[C@H](C)O[C@H](C)C2)cc1	C21H36ClNO	353.97	Microbiology/virology	Antibiotic; Antifungal	Antibiotic; Fungal	Amorolfine Hydrochloride is an antifungal reagent. It exerts the antifungal activity by selectively interrupting two steps in the pathway of ergosterol synthesis and eventually disrupting the function and structure of fungal cell membrane. Amorolfine, a morpholine antifungal drug, can inhibit D14 reductase and D7-D8 isomerase. These enzymes can deplete ergosterol and cause ignosterol to accumulat…	Espinel-Ingroff A, et al. Antimicrob Agents ChemOthers. 1984 Jul; 26(1):5-9.	54259	amorolfine hydrochloride; Amorolfine HCl; 78613-38-4; Loceryl; amorolfin; Amorolfine (hydrochloride); Pekiron; Amorolfine hydrochloride [JAN]; 106614-68-0; UNII-741YH7379H; Ro 14-4767/002; 741YH7379H; 78613-38-4 (HCl); (2R,6S)-2,6-dimethyl-4-(2-methyl-3-(4-(tert-pentyl)phenyl)propyl)morpholine hydrochloride; Amorolfine hydrochloride (JAN); Curanail; Locetar; Odenil; Amorolfine (as hydrochloride);…	XZKWIPVTHGWDCF-KUZYQSSXSA-N	CHEMBL4303363		Others	Others	Antibiotic; Antifungal; Others; Others	Sterol Î”^14-reductase and Sterol Î”^8-Î”^7-isomerase		Ryder NS. "Mechanism of action and selectivity of amorolfine." Clin Exp Dermatol. 1992 Jul;17 Suppl 1:8-12.		Enzyme inhibitors	Steroid_Biosynthesis	Antibiotic
M92241	F	8	50	10	DMSO	122320-73-4	T0334	Rosiglitazone	BRL49653	CN(CCOc1ccc(CC2SC(=O)NC2=O)cc1)c1ccccn1	C18H19N3O3S	357.43	Apoptosis; Autophagy; Cell Cycle/Checkpoint; DNA Damage/DNA Repair; Membrane transporter/Ion channel; Metabolism	Autophagy; Ferroptosis; PPAR; TRP/TRPV Channel	PPAR; TRP Channel; Autophagy; Ferroptosis	Rosiglitazone is an insulin sensitizing agent and thiazolidinedione that is indicated for the treatment of type 2 diabetes. Rosiglitazone has been linked to rare instances of acute liver injury.	Fryer LG, et al. J Biol Chem, 2002, 277(28), 25226-25232.	77999	rosiglitazone; 122320-73-4; Avandia; 5-(4-(2-(Methyl(pyridin-2-yl)amino)ethoxy)benzyl)thiazolidine-2,4-dione; Rosiglizole; Brl-49653; Brl 49653; Rezult; BRL49653; TDZ 01; Gaudil; rosiglitazone (Avandia); Rosvel; C18H19N3O3S; Rosiglitazone [INN:BAN]; DTXSID7037131; CHEBI:50122; 5-[[4-[2-(methyl-2-pyridinylamino)ethoxy]phenyl]methyl]-2,4-thiazolidinedione; MFCD00871760; NSC-758698; UNII-05V02F2KDG;…	YASAKCUCGLMORW-UHFFFAOYSA-N	CHEMBL121	ROSIGLITAZONE	Others	Others	Autophagy; Ferroptosis; PPAR; TRP/TRPV Channel; Others; Others	Peroxisome proliferator-activated receptor gamma	PPARÎ³	https://www.ncbi.nlm.nih.gov/pmc/articles/PMC5401767/	hsa03320	Transcription factor	PPAR	Autophagy
M92241	F	9	50	10	DMSO	80474-14-2	T0188	Fluticasone propionate	CCI-187881	CCC(=O)O[C@@]1([C@H](C)C[C@H]2[C@@H]3C[C@H](F)C4=CC(=O)C=C[C@]4(C)[C@@]3(F)[C@@H](O)C[C@]12C)C(=O)SCF	C25H31F3O5S	500.57	Endocrinology/Hormones; Metabolism; Microbiology/virology	Endogenous Metabolite; Estrogen/progestogen Receptor; Glucocorticoid Receptor; Phospholipase; Virus Protease	Enterovirus; Endogenous Metabolite; ER; Mineralocorticoid Receptor; Glucocorticoid Receptor; Cytosolic PLA2	Fluticasone propionate, derived from fluticasone used to remedy asthma and allergic rhinitis, is a high affinity, selective GR (glucocorticoid receptor) agonist.	Baouz S, et al. Int Immunol,2005, 17(11), 1473-1481.	444036	FLUTICASONE PROPIONATE; 80474-14-2; Flovent; Cutivate; Flixotide; Flonase; Flixonase; Flovent HFA; Flusonal; Fluspiral; Flunase; Flutide; atemur; Asmatil; Axotide; Brethal; Fluinol; Flutivate; Flixotide Disk; Flixotide Disks; Flovent Diskus; Flovent Diskus 50; Flixotide Inhaler; Flovent Diskus 100; Flovent Diskus 250; Cultivate; Inalacor; Rinosone; Trialona; Ubizol; Zoflut; Flixonase Nasal Spray;…	WMWTYOKRWGGJOA-CENSZEJFSA-N	CHEMBL1473	FLUTICASONE PROPIONATE	Others	Others	Endogenous Metabolite; Estrogen/progestogen Receptor; Glucocorticoid Receptor; Phospholipase; Virus Protease; Others; Others	Glucocorticoid Receptor	GR	SchÃ¤cke H, DÃ¶cke WD, Asadullah K. "Mechanisms involved in the side effects of glucocorticoids." Pharmacology & Therapeutics 96.1 (2002): 23-43.	hsa04080	Receptor	Glucocorticoid_Receptor	Endogenous Metabolite
M92241	F	10	50	10	DMSO	54-21-7	T0335	Sodium salicylate	2-Hydroxybenzoic acid sodium salt; Salicylic acid sodium salt	[Na+].Oc1ccccc1C(=O)[O-]	C7H5NaO3	160.11	Apoptosis; Autophagy; Immunology/Inflammation; MAPK; Neuroscience; NF-ÎºB; PI3K/Akt/mTOR signaling	Apoptosis; Autophagy; COX; NF-ÎºB; S6 Kinase	COX-1; COX-3; NF-ÎºB; COX; Ribosomal S6 Kinase (RSK); Autophagy; Apoptosis	Sodium salicylate, a metabolite of acetylsalicylic acid, can inhibit NF-kB and reduce oxidative stress.	Kopp E, et al. Science, 1994, 265(5174), 956-959.	16760658	Sodium salicylate; 54-21-7; Sodium 2-hydroxybenzoate; Enterosalicyl; Kerasalicyl; Salsonin; Alysine; Clin; Enterosalil; Entrosalyl; Glutosalyl; Kerosal; Magsalyl; Nadisal; Salisod; Aroall; Benzoic acid, 2-hydroxy-, monosodium salt; Idocyl novum; Neo-salicyl; Natrum salicylicum; Monosodium salicylate; Parbocyl-rev; Salicylic acid sodium salt; Diuretin; salicylate sodium; Natrium salicylat; Sodium …	ABBQHOQBGMUPJH-UHFFFAOYSA-M	CHEMBL447868	SODIUM SALICYLATE	Others	Others	Apoptosis; Autophagy; COX; NF-ÎºB; S6 Kinase; Others; Others	Cyclooxygenase	COX	Vane JR, Botting RM. "Anti-inflammatory drugs and their mechanism of action." Inflammation Research 47 Suppl 2 (1998): S78-87. https://pubmed.ncbi.nlm.nih.gov/9522148/	hsa00590 (Arachidonic acid metabolism)	Enzyme	COX	Apoptosis
M92241	F	11	50	10	DMSO	137281-23-3	T0189	Pemetrexed acid	LY231514; Pemetrexed; LY-231514 Disodium Hydrate	Nc1nc(=O)c2c([nH]cc2CCc2ccc(cc2)C(=O)N[C@@H](CCC(=O)O)C(=O)O)[nH]1	C20H21N5O6	427.41	Autophagy; Cell Cycle/Checkpoint; DNA Damage/DNA Repair; Metabolism	Antifolate; Autophagy; DHFR; DNA/RNA Synthesis	Antifolate; Autophagy; DHFR; GARFT; Thymidylate synthase	Pemetrexed, a guanine-derived antineoplastic agent, binds to and inhibits the enzyme thymidylate synthase (TS).	Shih C, et al. LY231514, a pyrrolo[2,3-d]pyrimidine-based antifolate that inhibits multiple folate-requiring enzymes. Cancer Res. 1997 Mar 15;57(6):1116-23.	135410875	Pemetrexed; 137281-23-3; Pemetrexed disodium; Alimta; LY231514; CHEBI:63616; UNII-04Q9AIZ7NO; (S)-2-(4-(2-(2-Amino-4-oxo-4,7-dihydro-1H-pyrrolo[2,3-d]pyrimidin-5-yl)ethyl)benzamido)pentanedioic acid; 04Q9AIZ7NO; NSC-698037; PEMFEXY; HSDB 7316; LY-231514; N-[4-[2-(2-amino-4,7-dihydro-4-oxo-3H-pyrrolo[2,3-d]pyrimidin-5-yl)ethyl]benzoyl]-L-glutamic acid; DTXSID2048329; Pemetrexed Sodium; Pemetrexed …	WBXPDJSOTKVWSJ-ZDUSSCGKSA-N	CHEMBL225072	PEMETREXED	Others	Others	Antifolate; Autophagy; DHFR; DNA/RNA Synthesis; Others; Others	Dihydrofolate reductase; thymidylate synthase; glycinamide ribonucleotide formyltransferase; aminoimidazole carboxamide ribonucleotide formyltransferase	DHFR, TYMS, GART, AICART	https://www.ncbi.nlm.nih.gov/pmc/articles/PMC1891180/	hsa00670, hsa00240	Antifolate	DHFR	Antifolate
M92241	F	12	50	10	DMSO	13636-18-5	T0327	Fendiline hydrochloride	Fendiline HCl	Cl.CC(NCCC(c1ccccc1)c1ccccc1)c1ccccc1	C23H26ClN	351.91	Membrane transporter/Ion channel; Metabolism	Calcium Channel	Calcium Channel	Fendiline is a non-selective blocker of calcium channel.	SprÃ¼gel W, et al. Arzneimittelforschung. 1977;27(3):571-4.	5702162	Fendiline hydrochloride; 13636-18-5; Fendiline (hydrochloride); Fendiline HCl; Sensit; MLS000069570; DTXSID2045860; NSC-757826; NCGC00094891-01; 3,3-diphenyl-N-(1-phenylethyl)propan-1-amine hydrochloride; SMR000058827; Benzenepropanamine, gamma-phenyl-N-(1-phenylethyl)-, hydrochloride (1:1); UNII-HEM3Z10IIK; DTXCID0025860; HEM3Z10IIK; 3,3-diphenyl-N-(1-phenylethyl)propan-1-amine;hydrochloride; Be…	NJXWZWXCHBNOOG-UHFFFAOYSA-N	CHEMBL1405922	FENDILINE HYDROCHLORIDE	Others	Others	Calcium Channel; Others; Others	Calcium Channel		https://pubchem.ncbi.nlm.nih.gov/compound/Fendiline-hydrochloride#section=Pharmacology-and-Biochemistry		Calcium channel blocker	Calcium_Channel	Calcium Channel
M92241	F	13	50	10	DMSO	102767-28-2	T0192	Levetiracetam	UCB L059; SIB-S1	CC[C@H](N1CCCC1=O)C(=O)N	C8H14N2O2	170.21	Chromatin/Epigenetic; Membrane transporter/Ion channel; Metabolism	Calcium Channel; DNA Methyltransferase	Calcium Channel; Synaptic vesicle glycoprotein 2A; DNA Methyltransferase	Levetiracetam is a relatively unique anticonvulsant that is typically used in combination with other antiepileptic medications for partial onset seizures. Levetiracetam has been linked to rare instances of serum aminotransferase and alkaline phosphatase elevations during treatment and to rare cases of clinically apparent drug induced liver disease.	Gigant B, et al. Nature, 2005, 435(7041), 519-522.	5284583	Levetiracetam; 102767-28-2; Keppra; (S)-2-(2-Oxopyrrolidin-1-yl)butanamide; Keppra XR; ucb L059; (2S)-2-(2-oxopyrrolidin-1-yl)butanamide; UCB-L 059; matever; Levetiracetame; Levetiracetamum; Levroxa; Spritam; UCB-L059; Elepsia; etiracetam, S-isomer; Levipil; Levetiracetam [INN]; (S)-alpha-Ethyl-2-oxo-1-pyrrolidineacetamide; Levetiracetam sun; Elepsia XR; Levetiracetam teva; (S)-Levetiracetam; Lev…	HPHUVLMMVZITSG-LURJTMIESA-N	CHEMBL1286	LEVETIRACETAM	Others	Others	Calcium Channel; DNA Methyltransferase; Others; Others	Synaptic vesicle glycoprotein 2A (SV2A)	SV2A	https://www.ncbi.nlm.nih.gov/pmc/articles/PMC2655088/		Glycoprotein	Synaptic_vesicle_glycoprotein_2A_(SV2A)	Calcium Channel
M92241	F	14	50	10	DMSO	610309-89-2	T0342	Carvedilol phosphate	BM 14190 (phosphate hemihydrate); Carvedilol phosphate hemihydrate	O.OP(O)(O)=O.OP(O)(O)=O.COc1ccccc1OCCNCC(O)COc1cccc2[nH]c3ccccc3c12.COc1ccccc1OCCNCC(O)COc1cccc2[nH]c3ccccc3c12	C24H26N2O4Â·H2OÂ·H3O4P	522.49	Angiogenesis; Autophagy; Cytoskeletal Signaling; GPCR/G Protein; Membrane transporter/Ion channel; Metabolism; Neuroscience; Tyrosine Kinase/Adaptors	Adrenergic Receptor; Autophagy; Gap Junction Protein; Integrin; LDL; NADPH; Potassium Channel; VEGFR	Adrenergic Receptor; Gap Junction Protein; E-selectin; NADPH dehydrogenase; Natriuretic peptides B; VCAM1; Potassium Channel; VEGFR; LDL oxidation; Autophagy	Carvedilol Phosphate is the phosphate salt form of carvedilol, a racemic mixture and adrenergic blocking agent with antihypertensive activity and devoid of intrinsic sympathomimetic activity.	Nichols AJ, et al. Fundam Clin Pharmacol. 1991;5(1):25-38.	11954344	Carvedilol phosphate; Coreg CR; 610309-89-2; Carvedilol phosphate hemihydrate; Carvedilol dihydrogen phosphate hemihydrate; Carvedilol phosphate [USAN]; SKF 105517D; UNII-EQT531S367; EQT531S367; SK&F-105517-D; Carvedilol phosphate hydrate; 1-(9H-carbazol-4-yloxy)-3-[2-(2-methoxyphenoxy)ethylamino]propan-2-ol;phosphoric acid;hydrate; Carvedilol phosphate (USAN); Carvedilol phosphate hydrate (JAN);…	LHNYXTULDSJZRB-UHFFFAOYSA-N			Others	Others	Adrenergic Receptor; Autophagy; Gap Junction Protein; Integrin; LDL; NADPH; Potassium Channel; VEGFR; Others; Others	Adrenergic Receptor	ADR	Packer M, Bristow MR, Cohn JN, et al. "The effect of carvedilol on morbidity and mortality in patients with chronic heart failure." N Engl J Med 1996; 334:1349-1355.	hsa05414	G protein-coupled receptor	Adrenergic_Receptor	Adrenergic Receptor
M92241	F	15	50	10	DMSO	53746-45-5	T0184	Fenoprofen calcium dihydrate		O.O.[Ca++].CC(C([O-])=O)c1cccc(Oc2ccccc2)c1.CC(C([O-])=O)c1cccc(Oc2ccccc2)c1	C30H30CaO8	558.63	Immunology/Inflammation; Neuroscience	COX	COX-1; COX-2	Fenoprofen calcium is a propionic acid derivative that is used as a non-steroidal anti-inflammatory agent.	Poggi JC, et al. J Clin Pharmacol. 2006 Nov;46(11):1328-36.	64747	Fenoprofen calcium dihydrate; Fenoprofen calcium; 53746-45-5; 71720-56-4; Fenopron; Feprona; Nalgesic; Fenoprofen calcium hydrate; Fenoprofen calcium salt dihydrate; Progesic; calcium 2-(3-phenoxyphenyl)propanoate dihydrate; Fepron; Lilly 69323; UNII-0X2CW1QABJ; Calcium 2-(m-phenoxyphenyl)propionate dihydrate; 0X2CW1QABJ; YM-09229; CHEBI:5005; Calcium (+-)-m-phenoxyhydratropate dihydrate; DTXSID6…	LZPBLUATTGKZBH-UHFFFAOYSA-L	CHEMBL2103736	FENOPROFEN CALCIUM	Others	Others	COX; Others; Others	Cyclooxygenase (COX)	COX	https://www.ncbi.nlm.nih.gov/pmc/articles/PMC2784020/	hsa00590 (Arachidonic acid metabolism)	Enzyme	COX	COX
M92241	F	16	50	10	DMSO	66085-59-4	T0343	Nimodipine	BAY-e 9736	COCCOC(=O)C1=C(C)NC(=C(C1c1cc(ccc1)[N+](=O)[O-])C(=O)OC(C)C)C	C21H26N2O7	418.44	Autophagy; Endocrinology/Hormones; Immunology/Inflammation; Membrane transporter/Ion channel; Metabolism	AhR; Autophagy; Calcium Channel; Glucocorticoid Receptor	AhR; Calcium Channel; Mineralocorticoid Receptor; Autophagy	Nimodipine, a 1, 4-dihydropyridine calcium channel blocker, acts primarily on vascular smooth muscle cells.	Moyer JR Jr, et al. J Neurophysiol,1992, 68(6), 2100-2109.	4497	nimodipine; 66085-59-4; Nimotop; Periplum; Admon; Nimodipino; Nymalize; BAY e 9736; Nimodipinum; Bay-E 9736; Nimodipinum [INN-Latin]; Nimodipino [INN-Spanish]; Bay-e-9736; nemotan; 3-isopropyl 5-(2-methoxyethyl) 2,6-dimethyl-4-(3-nitrophenyl)-1,4-dihydropyridine-3,5-dicarboxylate; Isopropyl 2-methoxyethyl 1,4-dihydro-2,6-dimethyl-4-(m-nitrophenyl)-3,5-pyridinedicarboxylate; Nimodipine ap; NimoGel…	UIAGMCDKSXEBJQ-UHFFFAOYSA-N	CHEMBL1428	NIMODIPINE	Others	Others	AhR; Autophagy; Calcium Channel; Glucocorticoid Receptor; Others; Others	L-type calcium channel	CACNA1C	https://www.ncbi.nlm.nih.gov/pmc/articles/PMC2743425/	hsa04020	Ion channel	Calcium_Channel	AhR
M92241	F	17	50	10	DMSO	3366-95-8	T0195	Secnidazole	PM-185184; RP-14539	CC(O)Cn1c(C)ncc1[N+](=O)[O-]	C7H11N3O3	185.18	Microbiology/virology	Antibiotic; Parasite	Antibiotic; Parasite	Secnidazole is a second-generation 5-nitroimidazole antimicrobial that is structurally related to other 5-nitroimidazoles including [DB00916] and [DB00911], but displays improved oral absorption and longer terminal elimination half-life than antimicrobial agents in this class [A27210]. Secnidazole is selective against many anaerobic Gram-positive and Gram-negative bacteria and protozoa.	De Backer, et al. Clinical Microbiology and Infection 16 (5): 470â€“472.	71815	Secnidazole; 3366-95-8; Secnidazol; Flagentyl; 1-(2-methyl-5-nitro-1H-imidazol-1-yl)propan-2-ol; Secnidazolum; Secnidazolum [INN-Latin]; Solosec; RP 14539; Secnidal; Secnidazole (Flagentyl); C7H11N3O3; Secnidazol [INN-Spanish]; PM 185184; PM-185184; SYM-1219; Secnidazole anhydrous; 1-(2-methyl-5-nitroimidazol-1-yl)propan-2-ol; RP-14539; Ornidazole metabolite m4; EINECS 222-134-0; 1-(2-Methyl-5-ni…	KPQZUUQMTUIKBP-UHFFFAOYSA-N	CHEMBL498847	SECNIDAZOLE	Others	Others	Antibiotic; Parasite; Others; Others	Nitroreductase enzymes in anaerobic bacteria and protozoa		https://www.sciencedirect.com/science/article/pii/S2214008517300028 ("Mechanisms of action of metronidazole and secnidazole" in Microbial Pathogenesis, March 2017)		Enzyme	Nitroreductase_enzymes_in_anaerobic_bacteria_and_protozoa	Antibiotic
M92241	F	18	50	10	DMSO	7280-37-7	T0345	Estropipate	Estrone sulfate piperazine salt; Piperazine estrone sulfate; Pipestrone	C1CNCCN1.C[C@]12CC[C@H]3[C@@H](CCc4c3ccc(OS(=O)(=O)O)c4)[C@@H]1CCC2=O	C22H32N2O5S	436.56	Endocrinology/Hormones	Estrogen Receptor/ERR; Estrogen/progestogen Receptor	ER; Estrogen Receptor/ERR	Estropipate is a natural estrogenic substance composed of estrone sulfate and piperazine.	Brama M, et al. Mol Cell Endocrinol. 2007 Jan 29;264(1-2):102-8.	5284555	Estropipate; 7280-37-7; Piperazine estrone sulfate; Ogen; Harmogen; Ortho-Est; Estrone sulfate piperazine salt; Sulestrex; UNII-SVI38UY019; Sulestrex piperazine; piperazine estrone sulphate; OGEN 5; Estropipate [USP:INN:BAN]; OGEN 2.5; SVI38UY019; DTXSID3023005; OGEN .625; OGEN 1.25; EINECS 230-696-3; Piperazine estronesulfate; NSC-758912; Estrone hydrogen sulfate compound with piperazine (1:1); …	HZEQBCVBILBTEP-ZFINNJDLSA-N	CHEMBL1200980	ESTROPIPATE	Others	Others	Estrogen Receptor/ERR; Estrogen/progestogen Receptor; Others; Others	Estrogen Receptor	ER	https://www.ncbi.nlm.nih.gov/pmc/articles/PMC2072879/	hsa04915	Receptor	Estrogen_Receptor	Estrogen Receptor/ERR
M92241	F	19	50	10	DMSO	15307-86-5	T0196	Diclofenac	Diclofenacum; Voltaren	c1ccc(c(c1)CC(=O)O)Nc1c(cccc1Cl)Cl	C14H11Cl2NO2	296.15	Apoptosis; Immunology/Inflammation; Neuroscience	Apoptosis; COX	Apoptosis; COX	Diclofenac is a nonsteroidal benzeneacetic acid derivative with anti-inflammatory activity. Diclofenac binds and chelates both isoforms of cyclooxygenase (COX-1 and-2), thereby blocking the conversion of arachidonic acid to pro-inflammatory-proprostaglandins.	Prokkola JM, et al. Aquat Toxicol. 2015 Jan;158:116-24.	3033	diclofenac; Diclofenac acid; 15307-86-5; dichlofenac; Diclofenacum; Diclophenac; Diclofenaco; ProSorb-D; 2-(2-((2,6-Dichlorophenyl)amino)phenyl)acetic acid; Diclofenac resinate; Voltarol; Diclofenac free acid; 2-(2,6-Dichloroanilino)phenylacetic Acid; Dichlofenal; Dicrofenac; Zorovolex; Zorvolex; 2-{2-[(2,6-dichlorophenyl)amino]phenyl}acetic acid; Diclofenamic acid; Benzeneacetic acid, 2-[(2,6-di…	DCOPUUMXTXDBNB-UHFFFAOYSA-N	CHEMBL139	DICLOFENAC	Others	Others	Apoptosis; COX; Others; Others	Cyclooxygenase-2	COX-2	https://pubchem.ncbi.nlm.nih.gov/compound/Diclofenac#section=Pharmacology-and-Biochemistry	hsa00590	Enzyme	COX	Apoptosis
M92241	F	20	50	10	DMSO	22916-47-8	T0344	Miconazole	R18134	Clc1cc(Cl)c(COC(Cn2ccnc2)c2c(Cl)cc(Cl)cc2)cc1	C18H14Cl4N2O	416.13	Immunology/Inflammation; Membrane transporter/Ion channel; Microbiology/virology	Anti-infection; Antibacterial; Antibiotic; Antifungal; NOS; Potassium Channel	14-Î± Demethylase; eNOS; iNOS; Potassium Channel; Fungal; Bacterial; Antibiotic	Miconazole is an imidazole antifungal agent that is used topically and by intravenous infusion.	White TC, et al. Clin Microbiol Rev. 1998 Apr;11(2):382-402.	4189	miconazole; 22916-47-8; Monistat; Monistat IV; Daktarin IV; Miconazolo; Miconazolum; Miconazol; Minostate; 1-[2-(2,4-Dichlorophenyl)-2-[(2,4-dichlorophenyl)methoxy]ethyl]-1H-imidazole; Dactarin; MJR 1762; Miconazolum [INN-Latin]; Vusion; Miconazolo [DCIT]; Micozole; Zimycan; Monistat-Derm; Florid(nitrate); 1-(2-((2,4-Dichlorobenzyl)oxy)-2-(2,4-dichlorophenyl)ethyl)-1H-imidazole; Femizol-M; Micona…	BYBLEWFAAKGYCD-UHFFFAOYSA-N	CHEMBL91	MICONAZOLE	Others	Others	Anti-infection; Antibacterial; Antibiotic; Antifungal; NOS; Potassium Channel; Others; Others	Cytochrome P450 lanosterol 14-alpha demethylase	CYP51	Vanden Bossche H, Marichal P, Odds FC, "Molecular mechanisms of drug resistance in fungi." Trends in Microbiology, Vol. 3, No. 11, November 1995, pp. 393-400.	hsa00140	Enzyme	Cytochrome	Anti-infection
M92241	F	21	50	10	DMSO	63074-08-8	T0197	Terazosin hydrochloride	Terazosin HCl; Hytrin; Zayasel; Terazosine; Fosfomic; Blavin	NC1=NC(N2CCN(C(C3CCCO3)=O)CC2)=NC(C=C4OC)=C1C=C4OC.Cl	C19H26ClN5O4	423.89	GPCR/G Protein; Neuroscience	Adrenergic Receptor	Adrenergic Receptor; Î±-adrenergic receptor	Terazosin, a selective alpha1-antagonist, can treat the benign prostatic hyperplasia (BPH). It also can lower blood pressure, so it is a drug of choice for patients with prostate enlargement and hypertension. It works on the smooth muscle of the bladder and the blood vessel walls by blocking the function of adrenaline.	Robert Papay, et al. Journal of Neurochemistry. 2002, 83:623-634.	44383	Terazosin hydrochloride; 63074-08-8; Terazosin HCl; Hytrin; Terasin; Vasocard; Zayasel; Terazosin hydrochloride anhydrous; (4-(4-amino-6,7-dimethoxyquinazolin-2-yl)piperazin-1-yl)(tetrahydrofuran-2-yl)methanone hydrochloride; UNII-8QOP8Z9955; MLS000040261; Piperazine, 1-(4-amino-6,7-dimethoxy-2-quinazolinyl)-4-((tetrahydro-2-furanyl)carbonyl)-, monohydrochloride; Terazosin (hydrochloride); DTXSID…	IWSWDOUXSCRCKW-UHFFFAOYSA-N	CHEMBL1256665	TERAZOSIN HYDROCHLORIDE	Others	Others	Adrenergic Receptor; Others; Others	Alpha-1 adrenergic receptor	ADRA1	https://www.ncbi.nlm.nih.gov/pmc/articles/PMC4311594/	hsa04080	G protein-coupled receptor	Adrenergic_Receptor	Adrenergic Receptor
M92241	F	22	50	10	DMSO	32780-64-6	T0348	Labetalol hydrochloride	Sch-15719W; AH-5158 hydrochloride; Labetalol HCl	CC(NCC(c1cc(C(=O)N)c(cc1)O)O)CCc1ccccc1.Cl	C19H25ClN2O3	364.87	GPCR/G Protein; Neuroscience	Adrenergic Receptor	Adrenergic Receptor; Î±1-adrenergic receptor	Labetalol hydrochloride, a salicylamide derivative, is a non-cardioselective blocker of Î²-adrenergic receptors and Î±1-adrenergic receptors.	Riva E, et al. Br J Pharmacol. 1991 Dec;104(4):823-8.	71412	Labetalol hydrochloride; 32780-64-6; Labetalol HCL; Amipress; Presdate; Normodyne; Trandate; Labetalol (hydrochloride); Labrocol; Pressalolo; ScH 15719W; Ipolab; AH 5158A; Sch-15719W; 2-Hydroxy-5-(1-hydroxy-2-((4-phenylbutan-2-yl)amino)ethyl)benzamide hydrochloride; CCRIS 1086; Ibidomide hydrochloride; AH-5158A; EINECS 251-211-1; UNII-1GEV3BAW9J; 1GEV3BAW9J; NSC 290312; NSC-290312; 32780-64-6 (HC…	WQVZLXWQESQGIF-UHFFFAOYSA-N	CHEMBL1200323	LABETALOL HYDROCHLORIDE	Others	Others	Adrenergic Receptor; Others; Others	Alpha-1 adrenergic receptor and Beta adrenergic receptors	ADRA1, ADRB	"Labetalol." DrugBank Online, DrugBank. [https://www.drugbank.ca/drugs/DB00598](https://www.drugbank.ca/drugs/DB00598)	hsa04080	G protein-coupled receptor	Adrenergic_Receptor	Adrenergic Receptor
M92241	G	3	50	10	DMSO	333-41-5	T0998	Diazinon	Dimpylate	CCOP(=S)(OCC)OC1=NC(=NC(C)=C1)C(C)C	C12H21N2O3PS	304.35	Microbiology/virology; Neuroscience	ChE; Parasite	ChE; Parasite	Diazinon is a thiophosphoric acid ester, is a nonsystemic organophosphate insecticide, used to control cockroaches, silverfish, ants, and fleas.	Katuli KK, et al. Chemosphere. 2014 Aug;108:396-404.	3017	diazinon; Dimpylate; 333-41-5; Diazinone; Oleodiazinon; Ciazinon; Neocidol; Dassitox; Diazitol; Ektoband; Nedcidol; Spectracide; Antigal; Basudin; Bazuden; Dacutox; Dazzel; Diazide; Diazol; Exodin; Flytrol; Galesan; Nucidol; Sarolex; Dicid; Alfa-tox; Diazajet; Dimpylat; Garden Tox; Bassadinon; Terminator; Compass; Disonex; Dizinon; Drawizon; Kayazinon; Kayazol; Meodinon; Dyzol; Nipsan; Diazinon a…	FHIVAFMUCKRCQO-UHFFFAOYSA-N	CHEMBL388560	DIMPYLATE	Others	Others	ChE; Parasite; Others; Others	Cholinesterase	ChE	Costa LG. "Current issues in organophosphate toxicology." Clinica Chimica Acta; international journal of clinical chemistry 366.1-2 (2006): 1-13. https://www.sciencedirect.com/science/article/pii/S0009898105004383	hsa00564	enzyme	Cholinesterase	ChE
M92241	G	4	50	10	DMSO	118-10-5	T0012	Cinchonine	LA40221; (8R,9S)-Cinchonine	O[C@H]([C@H]1C[C@@H]2CC[N@]1C[C@@H]2C=C)c1ccnc2ccccc12	C19H22N2O	294.39	Apoptosis; Membrane transporter/Ion channel; Microbiology/virology; Neuroscience	Apoptosis; P-gp; Parasite	Apoptosis; Parasite; P-gpÂ (P-glycoprotein)	Cinchonine, a local anesthetic of the amide type, now generally used for surface anesthesia. It is one of the most potent and toxic of the long-acting local narcotics and its parenteral use is restricted to spinal anesthesia.	Oka M, et al. Eur J Pharmacol. 2002 Oct 4;452(2):175-81.	90454	cinchonine; 118-10-5; (+)-Cinchonine; D-Cinchonine; Cinchonan-9-ol, (9S)-; (8R,9S)-Cinchonine; (9S)-Cinchonan-9-ol; (+)-Cinconine; TCMDC-123933; cinchonin; (+)-cinchonin; GNF-Pf-3189; NSC-6176; UNII-V43X79NZCD; V43X79NZCD; (1S)-Quinolin-4-yl((2R,4S,5R)-5-vinylquinuclidin-2-yl)methanol; DTXSID6045082; CHEBI:27509; C19H22N2O; MFCD00064372; 2-Quinuclidinemethanol, .alpha.-(5-vinyl-2-quinolyl)-; NSC6…	KMPWYEUPVWOPIM-QAMTZSDWSA-N	CHEMBL588619	CINCHONINE	Others	Others	Apoptosis; P-gp; Parasite; Others; Others	P-glycoprotein	P-gp	https://www.ncbi.nlm.nih.gov/pmc/articles/PMC2630898/	hsa01524	ATP-binding cassette transporter	P-glycoprotein	Apoptosis
M92241	G	5	50	10	DMSO	3731-52-0	T1581	Picolamine		NCc1cnccc1	C6H8N2	108.14	Proteases/Proteasome	DPP-4	DPP-4	Picolamine acts as a potential inhibitor of DPP-4.	Reddy PR, Shilpa A. Chem Biodivers. 2012 Oct;9(10):2262-81.	31018	3-(Aminomethyl)pyridine; 3731-52-0; pyridin-3-ylmethanamine; Picolamine; 3-Pyridinemethanamine; 3-Picolylamine; 3-Pyridylmethylamine; 3-Aminomethylpyridine; 3-Pyridinylmethanamine; 3-Pyridinemethylamine; (pyridin-3-yl)methanamine; 3-pyridylmethanamine; Pyridine, 3-(aminomethyl)-; Picolamina; Picolaminum; 1-(Pyridin-3-yl)methanamine; Picolamine [INN:DCF]; Picolaminum [INN-Latin]; MFCD00006412; NSC…	HDOUGSFASVGDCS-UHFFFAOYSA-N	CHEMBL1988272	PICOLAMINE	Others	Others	DPP-4; Others; Others						DPP	DPP-4
M92241	G	6	50	10	DMSO	2624-44-4	T0002	Ethamsylate	Etamsylate; Cyclonamine; Aglumin; Dicynene	Oc1cc(c(O)cc1)S(=O)(=O)O.C(NCC)C	C10H17NO5S	263.31	GPCR/G Protein; Immunology/Inflammation	Prostaglandin Receptor	Prostaglandin Receptor	Ethamsylate usually is used as a hemostatic drug, which increases capillary endothelial resistance and platelet adhesion, and inhibits biosynthesis and action of prostaglandins.	KovÃ¡cs L, et al. Experientia, 1981, 37(11), 1182-1183	17506	Etamsylate; ETHAMSYLATE; 2624-44-4; Cyclonamine; Aglumin; Dicynene; Altodor; Ciclonamina; Dicynone; Eselin; Ethamsylate [USAN]; Ciclonamina [Italian]; MD 141; Etamsilate; Etamsilato; Etamsylatum; Etamsylatum [INN-Latin]; diethylamine 2,5-dihydroxybenzenesulfonate; Etamsilato [INN-Spanish]; E 141; Etamsylate [INN]; Diethylamine dobesilate; EINECS 220-090-7; Ethamsylate [USAN:BAN]; UNII-24YL531VOH;…	HBGOLJKPSFNJSD-UHFFFAOYSA-N	CHEMBL1514715	ETHAMSYLATE	Others	Others	Prostaglandin Receptor; Others; Others	Prostaglandin Receptor				Receptor	Prostaglandin	Prostaglandin Receptor
M92241	G	7	50	10	DMSO	4180-23-8	T0762	Trans-Anethole	(E)â€‹-Anethole; 4-Propenylanisole	COc1ccc(cc1)\C=C\C	C10H12O	148.2	Metabolism	Endogenous Metabolite	Endogenous Metabolite	Anethole (anise camphor), an organic compound, is widely served as a condiment substance. It is a derivative of phenylpropene, a type of aromatic compound that exists widely in essential oils.	Ryu J, et al. J Agric Food Chem. 2005 Jul 27;53(15):5954-8.	637563	ANETHOLE; trans-Anethole; 4180-23-8; 104-46-1; (E)-Anethole; p-Propenylanisole; (E)-1-Methoxy-4-(prop-1-en-1-yl)benzene; Anise camphor; Isoestragole; 4-Propenylanisole; Monasirup; cis-Anethol; Anethol; (E)-p-Propenylanisole; trans-p-Propenylanisole; trans-Anethol; p-Anethole; Anethole, trans; Anisole, p-propenyl-; (E)-Anethol; Aniskampfer; 1-Methoxy-4-(prop-1-en-1-yl)benzene; Anethole, trans-; tr…	RUVINXPYWBROJD-ONEGZZNKSA-N	CHEMBL452630	ANETHOLE	Others	Others	Endogenous Metabolite; Others; Others	Endogenous Metabolite					Metabolite	Endogenous Metabolite
M92241	G	8	50	10	DMSO	65-45-2	T0004	Salicylamide	2-Hydroxybenzamide; Salamide	NC(=O)C1=CC=CC=C1O	C7H7NO2	137.14	Immunology/Inflammation; Neuroscience	COX	COX-1; COX-2	Salicylamide is an over-the-counter drug with analgesic and antipyretic properties, which has similar medicinal properties to aspirin. In the over-the-counter pain remedies, Salicylamide is used in combination with both aspirin and caffeine.	Manin AN, et al. J Phys Chem B. 2014 Jun 19;118(24):6803-14.	5147	salicylamide; 2-Hydroxybenzamide; 65-45-2; o-Hydroxybenzamide; 2-Carbamoylphenol; Salicylic acid amide; Benzamide, 2-hydroxy-; Salamide; Urtosal; 2-Carboxamidophenol; Algiamida; Amidosal; Dolomide; Dropsprin; Eggosalil; Flarpirina; Liquiprin; Morsarinas; Panithal; Raspberin; Saliamid; Saliamin; Salizell; Serramida; Algamon; Allevin; Anamid; Andasol; Novecyl; Oramid; Salamid; Salicim; Salipur; Sal…	SKZKKFZAGNVIMN-UHFFFAOYSA-N	CHEMBL27577	SALICYLAMIDE	Others	Others	COX; Others; Others	Cyclooxygenase (COX)	COX	"Salicylamide" on DrugBank (https://go.drugbank.com/drugs/DB01305)	hsa00590	enzyme	COX	COX
M92241	G	9	50	10	DMSO	483-63-6	T0376	Crotamiton	Crotamitone; Eurax; Veteusan	C/C=C/C(N(CC)C1=CC=CC=C1C)=O	C13H17NO	203.28	Microbiology/virology	Parasite	Parasite	Crotamiton is an antipruritic and a scabicidal agent available as a lotion or cream for topical use only. It is a colorless to slightly yellowish oil with a faint amine-like odor. It is miscible with methanol and with alcohol.	Sekine R, et al. Exp Dermatol. 2012 Mar;21(3):201-4.	688020	crotamiton; 483-63-6; N-Ethyl-o-crotonotoluidide; trans-Crotamiton; Crotamitone; Eurax; Crotalgin; 124236-29-9; Veteusan; Crotamitex; Eurasil; Euraxil; Crotamitonum; Crotan; Crotonyl-N-ethyl-o-toluidine; Crotamiton, (E)-; 2-Butenamide, N-ethyl-N-(2-methylphenyl)-; Caswell No. 431B; Bestloid; Crotamitonum [INN-Latin]; (E)-N-ethyl-N-(2-methylphenyl)but-2-enamide; (E)-N-Ethyl-N-(o-tolyl)but-2-enamid…	DNTGGZPQPQTDQF-XBXARRHUSA-N	CHEMBL1200709	CROTAMITON	Others	Others	Parasite; Others; Others						Parasite	Parasite
M92241	G	10	50	10	DMSO	543-15-7	T0045	Heptaminol hydrochloride	RP-2831 hydrochloride	Cl.CC(N)CCCC(C)(C)O	C8H20ClNO	181.71	Others	Others	Others	Heptaminol hydrochloride, a vasoconstrictor, is used in the therapy of hypotension, especially orthostatic hypotension.	GARRETT J. Arch Int Pharmacodyn Ther. 1954 Nov 1;100(1):17-34.	10969	Heptaminol hydrochloride; 543-15-7; 6-Amino-2-methyl-2-heptanol hydrochloride; Cardiosintol; Cortensor; Arcor tropfen; Heptylon; Isoktamil; Izoktamil; Respirin; Corasor; Eoden; Heptamyl tropfen; Heptaminol (hydrochloride); Coreptil; Delmiton; Heptamyl hydrochloride; Heptylon tropfen; Hept-a-myl tropfen; Heptamyl; Heptaminol HCl; 2-Methyl-6-amino-2-heptanol hydrochloride; 2-HEPTANOL, 6-AMINO-2-MET…	JZNBMCOSOXIZJB-UHFFFAOYSA-N	CHEMBL2107282	HEPTAMINOL HYDROCHLORIDE	Others	Others	Others; Others; Others						Others	Others
M92241	G	11	50	10	DMSO	502-55-6	T1268	Dixanthogen	Aulinogen; Scabicidol; Auligen	CCOC(=S)SSC(=S)OCC	C6H10O2S4	242.4	Microbiology/virology	Parasite	Parasite	Dixanthogen is an ectoparasiticide.	DANBOLT N. Acta Derm Venereol. 1945; 26(1):103.	10404	Dixanthogen; 502-55-6; Auligen; Aulinogen; Scabicidol; Bexide; Bisethylxanthogen; Diethyl dixanthogen; Xantoscabin; Galasan; Herbisan; Lenisarin; Silfasan; Dixan; Diethyl dithiobis(thionoformate); K Preparation; Preparation K; BIS(ETHYLXANTHOGEN); Diethyl xanthogenate; Skabilan; Diethylxanthogen disulfide; Diethyl dixanthogenate; Xanthogen, bis(ethyl-; Diethylxanthic disulfide; Bis(ethylxanthic)d…	FVIGODVHAVLZOO-UHFFFAOYSA-N	CHEMBL331743	DIXANTHOGEN	Others	Others	Parasite; Others; Others						Parasite	Parasite
M92241	G	12	50	10	DMSO	50-42-0	T0072	Adiphenine hydrochloride	Adiphenine HCl; Patrovina; Sentiv; Spasnil	O=C(OCCN(CC)CC)C(C1=CC=CC=C1)C2=CC=CC=C2.[H]Cl	C20H25NO2Â·HCl	347.88	Neuroscience	AChR	nAChR; Nicotinic Receptor	Adiphenine hydrochloride, a nicotinic receptor inhibitor, can be used as an antispasmodic drug.	Spitzmaul G, et al. Br J Pharmacol. 2009 Jul;157(5):804-17.	5763	Adiphenine hydrochloride; 50-42-0; ADIPHENINE HCL; Patrovina; Spasnil; Sentiv; Adiphenine (hydrochloride); Trasentin hydrochloride; Adiphenine chloride; Adiphen hydrochloride; Difacil hydrochloride; Vegantin; Adifenin hydrochloride; Diphacil hydrochloride; Trasentine hydrochloride; Transentine hydrochloride; Adipheninium chloratum; Spasmolytin hydrochloride; Adiphenine hydrochloride [USAN]; 2-(Di…	LKPINBXAWIMZCG-UHFFFAOYSA-N	CHEMBL555654	ADIPHENINE HYDROCHLORIDE	Others	Others	AChR; Others; Others	Acetylcholine receptor	AChR	https://pubchem.ncbi.nlm.nih.gov/compound/Adiphenine-Hydrochloride#section=Pharmacology-and-Biochemistry	hsa04080	Ion channel	AChR	AChR
M92241	G	13	50	10	DMSO	504-03-0	T1007	Lupetidin	2,6-Lupetidine; Nanofin; 2,6-Dimethylpiperidine; Lupetidine; Naniopinum	CC1CCCC(C)N1	C7H15N	113.2	Neuroscience	AChR	AChR	Lupetidin is a neuropathic blocker, with antihypertensive effect.	SYRNEVA IuI. Farmakol Toksikol. 1961 May-Jun;24:304-9.	68843	2,6-Dimethylpiperidine; 504-03-0; Nanofin; 2,6-Lupetidine; Lupetidin; Lupetidine; Naniopinum; Piperidine, 2,6-dimethyl-; Nanophin; Nanophine; Nanophyn; 2,6-Dimethyl-Piperidine; Nanofin [INN]; Nanofine; Nanofina; Nanofinum; Nanofine [INN-French]; Nanofinum [INN-Latin]; Nanofina [INN-Spanish]; NSC 63890; EINECS 207-981-6; NSC-63890; BRN 0079827; UNII-329I5805BP; MFCD00005986; 329I5805BP; Naniopine;…	SDGKUVSVPIIUCF-UHFFFAOYSA-N	CHEMBL2104431	NANOFIN	Others	Others	AChR; Others; Others						AChR	AChR
M92241	G	14	50	10	DMSO	1218-35-5	T0042	Xylometazoline hydrochloride	Xylometazoline HCl	Cl.Cc1cc(cc(C)c1CC1=NCCN1)C(C)(C)C	C16H24N2Â·HCl	280.84	GPCR/G Protein; Neuroscience	Adrenergic Receptor	Adrenergic Receptor; Î±1A-adrenergic receptor; Î±1B-adrenergic receptor; Î±1D-adrenergic receptor; Î±2A-adrenergic receptor; Î±2B-adrenergic receptor; Î±2C-adrenergic receptor	Xylometazoline Hydrochloride is an Î±-adrenoceptor agonist usually used as nasal decongestant.	Haenisch B, Fundam Clin Pharmacol, 2010, 24(6), 729-739.	5282386	Xylometazoline hydrochloride; 1218-35-5; Xylometazoline HCl; Xylometazoline (hydrochloride); 2-(4-tert-Butyl-2,6-dimethylbenzyl)-2-imidazoline hydrochloride; Otrivin hydrochloride; Neo-Synephrine II; NSC-757378; MLS000069695; DTXSID3045223; SMR000058526; 2-(4-(tert-butyl)-2,6-dimethylbenzyl)-4,5-dihydro-1H-imidazole hydrochloride; 1H-Imidazole, 2-[[4-(1,1-dimethylethyl)-2,6-dimethylphenyl]methyl]…	YGWFCQYETHJKNX-UHFFFAOYSA-N	CHEMBL1256400	XYLOMETAZOLINE HYDROCHLORIDE	Others	Others	Adrenergic Receptor; Others; Others	Adrenergic Receptor	ADR	https://www.ncbi.nlm.nih.gov/pmc/articles/PMC2694760/	hsa04080	G protein-coupled receptor	Adrenergic_Receptor	Adrenergic Receptor
M92241	G	15	50	10	DMSO	1951-03-06	T0727	Piperonyl butoxide	ENT-14250; Butacide; Ethanol butoxide; Pyrenone 606	CCCCOCCOCCOCc1cc2c(OCO2)cc1CCC	C19H30O5	338.44	Microbiology/virology	Parasite	MFOs; Parasite	Piperonyl butoxide is an insecticide synergist, particularly for rotenone and pyrethroids.	Casida, J. E. J Agric Food Chem. 1970 Sep-Oct;18(5):753-72.	5794	PIPERONYL BUTOXIDE; 51-03-6; Butacide; Piperonylbutoxide; Butocide; Ethanol butoxide; Butoxide; 5-((2-(2-Butoxyethoxy)ethoxy)methyl)-6-propylbenzo[d][1,3]dioxole; Pyrenone 606; Butyl carbitol 6-propylpiperonyl ether; 6-Propylpiperonyl butyl diethylene glycol ether; Butoxide (synergist); Butoxide, Piperonyl; NCI-C02813; 2-(2-Butoxyethoxy)ethyl 6-propylpiperonyl ether; FMC 5273; NIA 5273; Caswell N…	FIPWRIJSWJWJAI-UHFFFAOYSA-N	CHEMBL1201131	PIPERONYL BUTOXIDE	Others	Others	Parasite; Others; Others	Cytochrome P450	CYP	https://pubmed.ncbi.nlm.nih.gov/10820139/		Enzyme Inhibitor	Cytochrome	Parasite
M92241	G	16	50	10	DMSO	152-43-2	T0040	Quinestrol	W-3566; Ethinylestradiol 3-cyclopentyl ether; EE2CPE	C[C@]12CC[C@H]3[C@@H](CCc4cc(OC5CCCC5)ccc34)[C@@H]1CC[C@@]2(O)C#C	C25H32O2	364.53	Endocrinology/Hormones	Estrogen Receptor/ERR; Estrogen/progestogen Receptor	ER; Estrogen Receptor/ERR	QuinestrolÂ is a synthetic estrogen, applied in hormone replacement therapy, and occasionally to use in cancer and prostate cancer treatment.	Shyu C, et al. Toxicol Appl Pharmacol. 2010 Nov 12.	9046	QUINESTROL; 152-43-2; Estrovis; Estrovister; Plestrovis; Eston; Estradiol-17-beta 3-cyclopentyl ether; Quinestrolo [DCIT]; Qui-Lea; Quinestrolum; EECPE; Estrovis 4000; Quinestrolum [INN-Latin]; Quinestrolo; 17-alpha-Ethinylestradiol 3-cyclopentyl ether; 17alpha-Ethynylestradiol 3-cyclopentyl ether; Quilea; W 3566; W-3566; Estrovis (TN); Quinestrol [USAN:INN:BAN]; Quinestrol (USAN/INN); EINECS 205…	PWZUUYSISTUNDW-VAFBSOEGSA-N	CHEMBL1201165	QUINESTROL	Others	Others	Estrogen Receptor/ERR; Estrogen/progestogen Receptor; Others; Others	Estrogen Receptor	ER	https://pubmed.ncbi.nlm.nih.gov/2930783/	hsa04915	Receptor	Estrogen_Receptor	Estrogen Receptor/ERR
M92241	G	17	50	10	DMSO	541-91-3	T2893	Muscone	3-Methylcyclopentadecanone; Methylexaltone	C1C(CCCCCCCCCCCCC1=O)C	C16H30O	238.41	Apoptosis; Immunology/Inflammation; Membrane transporter/Ion channel; Neuroscience; NF-ÎºB; Proteases/Proteasome	MMP; NF-ÎºB; NOD-like Receptor (NLR); P-gp; TNF	Interleukin Related; TNF Receptor; NF-ÎºB; NOD-like Receptor (NLR); MMP-9; P-gpÂ (P-glycoprotein)	Muscone is an organic compound that is the primary contributor to the odor of musk.	Wang GY, Wang N, Liao HN. Cell Mol Neurobiol. 2015 Nov;35(8):1105-15.	10947	Muscone; 3-Methylcyclopentadecanone; 541-91-3; 3-Methylcyclopentadecan-1-one; MUSKONE; Methylexaltone; Cyclopentadecanone, 3-methyl-; Moschus ketone; dl-muscone; 3-Methyl-1-cyclopentadecanone; 5-Methyl-1-cyclopentadecanone; FEMA No. 3434; (+/-)-Muscone; HSDB 1219; EINECS 208-795-8; 3-methyl-cyclopentadecanone; UNII-5JO79R7S9R; AI3-38746; 5JO79R7S9R; 3-Methylcyclopentadecanone, dl-; MFCD00211114; …	ALHUZKCOMYUFRB-UHFFFAOYSA-N			Others	Others	MMP; NF-ÎºB; NOD-like Receptor (NLR); P-gp; TNF; Others; Others						MMP	MMP
M92241	G	18	50	10	DMSO	129938-20-1	T6461	Dapoxetine HCl	Dapoxetine hydrochloride; LY-210448 hydrochloride; LY-210448; Priligy	Cl.CN(C)[C@@H](CCOc1cccc2ccccc12)c1ccccc1	C21H23NOÂ·HCl	341.87	GPCR/G Protein; Neuroscience	5-HT Receptor; Serotonin Transporter	5-HT; Serotonin Transporter	Dapoxetine HCl is a selectivity short-acting serotonin reuptake inhibitor, used for the therapy of premature ejaculation.	Jeong I, et al. Neuropharmacology,2012, 62(7), 2261-2266.	71352	Dapoxetine hydrochloride; 129938-20-1; Dapoxetine HCl; Priligy; (S)-N,N-Dimethyl-3-(naphthalen-1-yloxy)-1-phenylpropan-1-amine hydrochloride; LY 210448 hydrochloride; LY-210448 hydrochloride; LY210448 HCl; Dapoxetine (hydrochloride); Dapoxetine, HCl; Dapoxetine hydrochloride [USAN]; UNII-U4OHT63MRI; U4OHT63MRI; (+)-Dapoxetine hydrochloride; Dapoxetine (as hydrochloride); Dapoxetine hydrochloride …	IHWDIQRWYNMKFM-BDQAORGHSA-N	CHEMBL2106574	DAPOXETINE HYDROCHLORIDE	Others	Others	5-HT Receptor; Serotonin Transporter; Others; Others	Serotonin transporter	SERT	https://pubchem.ncbi.nlm.nih.gov/compound/Dapoxetine-hydrochloride#section=Pharmacology-and-Biochemistry	hsa04726	Transporter	Serotonin	5-HT Receptor
M92241	G	19	50	10	DMSO	543-82-8	T0043	2-Amino-6-methylheptane	1,5-Dimethylhexylamine; 6-Methyl-2-heptylamine; Octodrine	CC(C)CCCC(C)N	C8H19N	129.24	GPCR/G Protein; Neuroscience	Dopamine Receptor	Dopamine Receptor	2-Amino-6-methylheptane is a local anesthetic and vasoconstrictor, but mainly as a pharmaceutical intermediate of Octamylamine.	FELLOWS EJ., et al. The pharmacology of 2-amino-6-methylheptane. J Pharmacol Exp Ther. 1947 Aug;90(4):351-8.	10982	Octodrine; 2-Amino-6-methylheptane; 543-82-8; 1,5-Dimethylhexylamine; 2-Heptanamine, 6-methyl-; 6-methylheptan-2-amine; 6-Methyl-2-heptylamine; Amidrine; Vaporpac; Octodrin; 2-Isooctyl amine; SKF 51; 2-Methyl-6-aminoheptane; 6-Amino-2-methylheptane; Ottodrina [DCIT]; SK&F 51; 2-Heptylamine, 6-methyl-; HEXYLAMINE, 1,5-DIMETHYL-; Isoctaminum; Octodrinum; Octodrina; Ottodrina; 6-Methyl-2-heptanamine…	QNIVIMYXGGFTAK-UHFFFAOYSA-N	CHEMBL2105833	OCTODRINE	Others	Others	Dopamine Receptor; Others; Others	Dopamine Receptor	DR		hsa04080	G protein-coupled receptor	Dopamine	Dopamine Receptor
M92241	G	20	50	10	DMSO	7081-53-0	T0038	Doxapram hydrochloride monohydrate	Doxapram hydrochloride hydrate; Doxapram HCl	O.Cl.CCN1CC(CCN2CCOCC2)C(C1=O)(c1ccccc1)c1ccccc1	C24H33ClN2O3ï¼ˆC24H30N2O2Â·ClHÂ·H2Oï¼‰	432.99	Membrane transporter/Ion channel	Potassium Channel	Potassium Channel; TASK-1; TASK-1/TASK-3 heterodimeric; TASK-3	Doxapram hydrochloride hydrate inhibits TASK-1, TASK-3, TASK-1/TASK-3 heterodimeric channel function with EC50 of 410 nM, 37 Î¼M, 9 Î¼M, respectively.	Cotten JF, et al. Anesth Analg, 2006, 102(3), 779-785.	64648	7081-53-0; Doxapram hydrochloride monohydrate; Doxapram HCL; Doxapram hydrochloride hydrate; DoxapraM interMediate; Doxapram (hydrochloride hydrate); 15083-72-4; Doxapram HCl H2O; AHR 619; UNII-P5RU6UOQ5Y; P5RU6UOQ5Y; AHR-619; 1-ethyl-4-(2-morpholinoethyl)-3,3-diphenylpyrrolidin-2-one hydrochloride hydrate; 1-ethyl-4-(2-morpholin-4-ylethyl)-3,3-diphenylpyrrolidin-2-one;hydrate;hydrochloride; 2-Py…	ZOMBFZRWMLIDPX-UHFFFAOYSA-N	CHEMBL3989519	DOXAPRAM HYDROCHLORIDE	Others	Others	Potassium Channel; Others; Others	Potassium Channel				Ion channel	Potassium_Channel	Potassium Channel
M92241	G	21	50	10	DMSO	5579-84-0	T0246	Betahistine dihydrochloride	Betahistine 2HCl; PT-9	Cl.CNCCc1ccccn1.Cl	C8H14Cl2N2	209.12	GPCR/G Protein; Immunology/Inflammation; Neuroscience	Histamine Receptor	H3 receptor; Histamine Receptor	Betahistine hydrochloride is a histamine analog and H1 receptor agonist that serves as a vasodilator.	Gbahou F, et al. J Pharmacol Exp Ther, 2010, 334(3), 945-954.	68643	Betahistine dihydrochloride; 5579-84-0; Betahistine hydrochloride; Betahistine 2HCl; Betahistine HCl; Serc; Betaserc; Microser; Antivom; 2-Pyridineethanamine, N-methyl-, dihydrochloride; Betahistine (dihydrochloride); PT-9; Novo-Betahistine; 2-(2-(Methylamino)ethyl)pyridine dihydrochloride; PT 9; Betahistine hydrochloride [USAN]; EINECS 226-966-5; Betahistine hydrochloride [USAN:USP]; methyl[2-(p…	XVDFMHARQUBJRE-UHFFFAOYSA-N	CHEMBL1446813	BETAHISTINE HYDROCHLORIDE	Others	Others	Histamine Receptor; Others; Others	Histamine H3 receptor	HRH3	MÃ¸ller M, Baeres FM. "The anatomy and function of the vestibular system." Neuroendocrinology Letters 24.6 (2003): 345-353.	hsa04080	Receptor	Histamine_Receptor	Histamine Receptor
M92241	G	22	50	10	DMSO	80-13-7	T0037	Halazone	Pantocid; Halazon; Cloritines	OC(=O)c1ccc(cc1)S(=O)(=O)N(Cl)Cl	C7H5Cl2NO4S	270.09	Membrane transporter/Ion channel; Metabolism; Microbiology/virology	Antibacterial; Antibiotic; Carbonic Anhydrase; Sodium Channel	Antibiotic; Bacterial; Carbonic Anhydrase; Sodium Channel	Halazone is fine white powder with an odor of chlorine. It has been widely used to disinfect drinking water.	HACKENBERG HW. Z Gesamte Hyg. 1964 Apr;10:241-51.	3552	halazone; 80-13-7; Halazon; Pantocid; Cloritines; 4-(Dichlorosulfamoyl)benzoic Acid; Pantocide; Pantosid; Pantotsid; Pentocid; Zeptabs; p-Sulfondichloramidobenzoic acid; Halazono; Halazonum; 4-(N,N-Dichlorosulfamoyl)benzoic acid; p-(Dichlorosulfamoyl)benzoic acid; p-Carboxybenzenesulfondichloroamide; Parasulfondichloramido benzoic acid; p-(N,N-Dichlorosulfamyl)benzoic acid; Halazone [INN]; Caswel…	XPDVQPODLRGWPL-UHFFFAOYSA-N	CHEMBL1368146	HALAZONE	Others	Others	Antibacterial; Antibiotic; Carbonic Anhydrase; Sodium Channel; Others; Others	Carbonic Anhydrase	CA	Supuran, Claudiu T. "Carbonic anhydrases: novel therapeutic applications for inhibitors and activators." Nature Reviews Drug Discovery 7, no. 2 (2008): 168-181.	hsa00190	Enzyme	Carbonic_Anhydrase	Antibacterial
M92241	H	3	50	10	DMSO	104010-37-9	T0198	Sodium ceftiofur	Ceftiofur sodium; Naxcel	CO\N=C(/C(=O)N[C@H]1[C@H]2SCC(CSC(=O)c3ccco3)=C(N2C1=O)C(O)=O)c1csc(N)n1	C19H16N5NaO7S3	545.54	Microbiology/virology	Antibacterial; Antibiotic	Antibacterial; Bacterial; Antibiotic	Ceftiofur sodium, an antibiotic of the cephalosporin type (third generation), is used as veterinary medicine.	Yancey RJ Jr, et al. Am J Vet Res. 1987 Jul; 48(7): 1050-3.	5484735	Ceftiofur; Ceftiofur E-isomer; MAN163YXK8; 80370-57-6; 120882-20-4; Ceftiofur [USAN]; (6R,7R)-7-((E)-2-(2-Aminothiazol-4-yl)-2-(methoxyimino)acetamido)-3-((furan-2-carbonylthio)methyl)-8-oxo-5-thia-1-azabicyclo(4.2.0)oct-2-ene-2-carboxylic acid; Ceftiofur [INN:BAN]; C19H17N5O7S3; C19-H17-N5-O7-S3; UNII-MAN163YXK8; Ceftiofur E-isomer [USP]; SCHEMBL332042; ZBHXIWJRIFEVQY-IHMPYVIRSA-N; NCGC00167543-…	ZBHXIWJRIFEVQY-HURQQZHVSA-N			Others	Others	Antibacterial; Antibiotic; Others; Others	Penicillin-binding proteins (PBPs)	PBPs	https://www.sciencedirect.com/topics/pharmacology-toxicology-and-pharmaceutical-science/ceftiofur		Antibacterial enzyme	Penicillin_Binding	Antibacterial
M92241	H	4	50	10	DMSO	106266-06-2	T0351	Risperidal	R 64 766; Risperidone	Cc1c(CCN2CCC(CC2)c2noc3c2ccc(F)c3)c(=O)n2CCCCc2n1	C23H27FN4O2	410.48	GPCR/G Protein; Membrane transporter/Ion channel; Neuroscience	5-HT Receptor; Adrenergic Receptor; Dopamine Receptor; P-gp	5-HT Receptor; Dopamine Receptor; P-glycoprotein; 5-HT2A; Î±2C-adrenergic receptor; D2; D2L; D3	Risperidone is a selective blocker of dopamine D2 receptors and serotonin 5-HT2 receptors that act as an atypical antipsychotic agent.	Angelucci F, et al. J Neurosci Res,2000, 60(6), 783-794.	5073	risperidone; 106266-06-2; Risperdal; Risperidal; Rispolept; Risperdal Consta; Risperin; Rispolin; Sequinan; Apexidone; Risperidal M-Tab; Risperidona; Risperidonum; Psychodal; Spiron; Risperidonum [Latin]; R 64 766; Risperidona [Spanish]; Risperdal M-Tab; Belivon; C23H27FN4O2; Perseris; Zophrenal; UNII-L6UH7ZF8HC; R 64766; R-64766; L6UH7ZF8HC; R 64,766; Risperdal (TN); NSC-759895; Risperidone (RIS…	RAPZEAPATHNIPO-UHFFFAOYSA-N	CHEMBL85	RISPERIDONE	Others	Others	5-HT Receptor; Adrenergic Receptor; Dopamine Receptor; P-gp; Others; Others	Dopamine D2 receptor	DRD2	Kapur S, Mamo D. "Half a century of antipsychotics and still a central role for dopamine D2 receptors." Progress in Neuro-Psychopharmacology & Biological Psychiatry 27, no. 7 (2003): 1081-1090.	hsa04080	G protein-coupled receptor	Dopamine	5-HT Receptor
M92241	H	5	50	10	DMSO	59263-76-2	T0201	Meptazinol hydrochloride	Meptazinol HCl	Cl.CCC1(CCCCN(C)C1)c1cc(O)ccc1	C15H23NOÂ·HCl	269.81	Endocrinology/Hormones; GPCR/G Protein; Neuroscience	Opioid Receptor	Opioid Receptor	Meptazinol Hcl, a unique centrally opioid analgesic, is used as a narcotic antagonist with analgesic properties.	Spiegel K, et al. J Pharmacol Exp Ther, 1984, 228(2), 414-419.	65483	MEPTAZINOL HYDROCHLORIDE; 59263-76-2; Meptazinol HCl; Meptazinol (hydrochloride); IL-22811 hydrochloride; WY-22811 hydrochloride; 3-(3-Ethylhexahydro-1-methyl-1H-azepin-3-yl)phenol hydrochloride; Meptid; Meptazinol hydrochloride [USAN]; Meptazinolhydrochloride; IL 22811 HCl; WY 22811 HCl; 3-(3-ethyl-1-methylazepan-3-yl)phenol hydrochloride; EINECS 261-683-0; UNII-T62FQ4ZCPA; Wy-22811; T62FQ4ZCPA;…	MPJUSISYVXABBH-UHFFFAOYSA-N	CHEMBL1477274	MEPTAZINOL HYDROCHLORIDE	Others	Others	Opioid Receptor; Others; Others	Opioid Receptor	OPR	https://www.ncbi.nlm.nih.gov/pmc/articles/PMC6473900/	hsa04080	G protein-coupled receptor	Opioid_Receptor	Opioid Receptor
M92241	H	6	50	10	DMSO	132-65-0	T0352	Dibenzothiophene	Diphenylene sulfide; Imino semicarbazide	s1c2ccccc2c2ccccc12	C12H8S	184.26	Others	Others	Others	Dibenzothiophene, a component of petroleum oils, is a sulfur-containing polycyclic aromatic hydrocarbon (PAH) derivate consisting of 3 fused rings with keratolytic activity.	Gray KA, et al. Nat Biotechnol, 1996, (13):1705-1709.	3023	dibenzothiophene; 132-65-0; Diphenylene sulfide; Dibenzo[b,d]thiophene; 9-Thiafluorene; alpha-Thiafluorene; 2,2'-Biphenylylene sulfide; Dibenzothiophene [USAN]; Dibenzo(b,d)thiophene; C12H8S; [1,1'-Biphenyl]-2,2'-diyl sulfide; .alpha.-Thiafluorene; CCRIS 5307; HSDB 7409; NSC 2843; NSC-2843; EINECS 205-072-9; MFCD00004969; (1,1'-Biphenyl)-2,2'-diyl sulfide; UNII-Z3D4AJ1R48; AI3-00043; Z3D4AJ1R48; …	IYYZUPMFVPLQIF-UHFFFAOYSA-N	CHEMBL219828	DIBENZOTHIOPHENE	Others	Others	Others; Others; Others						Others	Others
M92241	H	7	50	10	DMSO	350-12-9	T0202	Sulbentine	Dibenzthione	S=C1SCN(Cc2ccccc2)CN1Cc1ccccc1	C17H18N2S2	314.47	Microbiology/virology	Antifungal	Antifungal; Fungal	Sulbentine is an antifungal agent.	Thoma K, et alPharmazie. 1997 May;52(5):362-73.	67686	Sulbentine; Dibenzthione; 350-12-9; Carbothialdine; Dibenzthion; Afungin; Dibenzothione; Fungiplex; Refungine; Sulbentin; Noticin; Mecal; Carbothialdin D47; Sulbentine [INN]; Sulbentinum; Sulbentina; D 47; 3,5-dibenzyl-1,3,5-thiadiazinane-2-thione; Sulbentinum [INN-Latin]; Sulbentina [INN-Spanish]; EINECS 206-497-2; UNII-D0NR12WK9J; NSC 150555; NSC-150555; 2H-1,3,5-Thiadiazine-2-thione, tetrahydr…	QFVAWNPSRQWSDU-UHFFFAOYSA-N	CHEMBL151803	SULBENTINE	Others	Others	Antifungal; Others; Others						Antifungal	Antifungal
M92241	H	8	50	10	DMSO	2430-27-5	T0355	Valpramide	Valpromide; Depamide; Dipropylacetamide; 2-propylpentanamide	CCCC(CCC)C(=O)N	C8H17NO	143.23	Microbiology/virology	HSV	2-epoxide hydrolase; Limonene-1; Epoxide Hydrolase; HSV	Valpromide is a carboxamide derivative of valproic acid, used in the treatment of epilepsy and some affective disorders.	Lemoine P, et al. Eur Psychiatry. 2000 Nov;15(7):424-32.	71113	Valpromide; 2-PROPYLPENTANAMIDE; 2430-27-5; Depamide; Dipropylacetamide; 2,2-Di-n-propylacetamide; Valpramide; 2-Propylvaleramide; Pentanamide, 2-propyl-; 2-Propylpentamide; Valpromide [INN]; Propyl-2 valeramide; alpha-Propylvaleramide; Valeramide, 2-propyl-; Valpromida; Valpromidum; Valpromidum [INN-Latin]; Valpromida [INN-Spanish]; EINECS 219-394-2; UNII-RUA6CWU76G; MFCD00051534; RUA6CWU76G; BR…	OMOMUFTZPTXCHP-UHFFFAOYSA-N	CHEMBL93836	VALPROMIDE	Others	Others	HSV; Others; Others						Antiviral	HSV
M92241	H	9	50	10	DMSO	1225-55-4	T0204	Protriptyline hydrochloride	Protriptyline HCl	Cl.CNCCCC1c2ccccc2C=Cc2ccccc12	C19H21NÂ·HCl	299.84	GPCR/G Protein; Neuroscience	5-HT Receptor; AChR	AChE; Sert (Sodium-dependent)	Protriptyline Hydrochloride is the hydrochloride salt form of protriptyline, a tricyclic secondary amine with an antidepressant property. Protriptyline hydrochloride blocks the re-uptake of norepinephrine and serotonin by nerve terminals, thereby increasing available norepinephrine and serotonin. In addition, this agent exhibits anticholinergic activity.	McDougle CJ, et al. Mol Psychiatry. 1998 May;3(3):270-3.	6603149	Protriptyline hydrochloride; 1225-55-4; Protriptyline HCl; Concordin; Vivactil; Protriptyline (hydrochloride); Maximed; Triptyl; Triptil hydrochloride; Normethyl EX4442; MK-240; Triptil (VAN); NSC-169912; MLS000069697; DTXSID8046951; Protriptyline.HCl; MK-240 (VAN); UNII-44665V00O8; Protriptyline hydrochloride [USAN]; EINECS 214-956-3; 5H-Dibenzo[a,d]cycloheptene-5-propanamine, N-methyl-, hydroch…	OGQDIIKRQRZXJH-UHFFFAOYSA-N	CHEMBL1200332	PROTRIPTYLINE HYDROCHLORIDE	Others	Others	5-HT Receptor; AChR; Others; Others	5-HT Receptor, AChR	5HTR, AChR	"Protriptyline." PubChem Compound Database; U.S. National Library of Medicine. https://pubchem.ncbi.nlm.nih.gov/compound/Protriptyline-hydrochloride.	hsa04080, hsa04725	Receptor	5-HT	5-HT Receptor
M92241	H	10	50	10	DMSO	121-81-3	T0356	Nitromide	3,5-Dinitrobenzamide; 3, 5-Dinitrobenzamide	NC(=O)c1cc(cc(c1)[N+](=O)[O-])[N+](=O)[O-]	C7H5N3O5	211.14	Microbiology/virology	Parasite	Parasite	Nitromide is an anti-parasitic drug.	Chubis AI, Terebinov GI. Veterinariia. 1972 Dec;12:73-4.	4511	3,5-Dinitrobenzamide; nitromide; 121-81-3; Tristat; Unistat; Nitromide [USAN]; Benzamide, 3,5-dinitro-; component of Unistat-3; C7H5N3O5; component of Tristat; Nitroamide; EINECS 204-499-8; UNII-9DUJ3CMK8S; NSC 60719; NSC-60719; 9DUJ3CMK8S; BRN 1981935; DTXSID0045836; NSC60719; Nitromide (USAN); NCGC00094736-01; 4-09-00-01351 (Beilstein Handbook Reference); DTXCID8025836; CAS-121-81-3; SR-0500000…	UUKWKUSGGZNXGA-UHFFFAOYSA-N	CHEMBL1437065	NITROMIDE	Others	Others	Parasite; Others; Others						Parasite	Parasite
M92241	H	11	50	10	DMSO	980-71-2	T0205	Brompheniramine hydrogen maleate	Brompheniramine maleate; Dimetane; Rolabromophen; Dimotane	OC(=O)/C=C\C(=O)O.CN(C)CCC(c1ccc(Br)cc1)c1ccccn1	C16H19BrN2Â·C4H4O4	435.31	GPCR/G Protein; Immunology/Inflammation; Neuroscience	5-HT Receptor; Histamine Receptor	Histamine Receptor; HT	Brompheniramine maleate is an antagonist against histamine H1 receptors.	Tardioli S, et al. J Phys Chem B. 2012 Jun 21;116(24):7033-9.	5281067	Brompheniramine maleate; 980-71-2; Brompheniramine hydrogen maleate; Dimetane; Rolabromophen; Dimotane; Drauxin; Gammistin; Nagemid; Spentane; Veltane; Allent; Ebalin; Dimetane-ten; Parabromdylamine maleate; Brompheniramine (maleate); Dimetapp Allergy; Dimetane Extentabs; Lodrane; Brompheniramine maleate [USP]; (+/-)-Brompheniramine maleate; Bromopheniramine maleate; EINECS 213-562-9; UNII-IXA7C9…	SRGKFVAASLQVBO-BTJKTKAUSA-N	CHEMBL1200961	BROMPHENIRAMINE MALEATE	Others	Others	5-HT Receptor; Histamine Receptor; Others; Others	Histamine Receptor	HRH	https://www.ncbi.nlm.nih.gov/pmc/articles/PMC3449676/	hsa04080	G protein-coupled receptor	Histamine_Receptor	5-HT Receptor
M92241	H	12	50	10	DMSO	1937-19-5	T0358	Aminoguanidine hydrochloride	CP-12009-18 tartrate; Pimagedine hydrochloride; Pimagedine; Guanyl hydrazine; Hydrazinecarboximidamide; Imino semicarbazide	Cl.NNC(N)=N	CH6N4Â·HCl	110.55	Immunology/Inflammation	NO Synthase; NOS	iNOS; NO Synthase	Aminoguanidine hydrochloride is a diamine oxidase and NO synthase inhibitor, used in the treatment of diabetic nephropathy.	Rokkas T, et al. Digestion. 1990, 46 Suppl 2:447-457.	2734687	Aminoguanidine hydrochloride; 1937-19-5; 16139-18-7; Pimagedine hydrochloride; Pimagedine HCl; Hydrazinecarboximidamide, monohydrochloride; Aminoguanidine HCl; Carbazamidine hydrochloride; Hydrazinecarboximidamide hydrochloride; Guanylhydrazine hydrochloride; 2-aminoguanidine;hydrochloride; Aminoguanidine (hydrochloride); Carbazamidine HCl; MFCD00039074; Hydrazinecarboximidamide, hydrochloride; 1…	UBDZFAGVPPMTIT-UHFFFAOYSA-N	CHEMBL1256292	PIMAGEDINE HYDROCHLORIDE	Others	Others	NO Synthase; NOS; Others; Others	Nitric oxide synthase	NOS	https://www.ncbi.nlm.nih.gov/pmc/articles/PMC4049057/	hsa04726	Enzyme	NOS	NO Synthase
M92241	H	13	50	10	DMSO	103628-48-4	T0203	Sumatriptan succinate	GR 43175	OC(=O)CCC(O)=O.CNS(=O)(=O)Cc1ccc2[nH]cc(CCN(C)C)c2c1	C18H27N3O6S	413.49	GPCR/G Protein; Neuroscience	5-HT Receptor	5-HT; 5-HT Receptor	Sumatriptan succinate, a serotonin1 (5-HT1) receptor agonist, is used in the acute treatment of a migraine headache.	Peroutka SJ, et al. Eur J Pharmacol, 1989, 163(1), 133-136.	59772	SUMATRIPTAN SUCCINATE; 103628-48-4; Imigran; Micralgin; Migratan; Suminat; 1-(3-(2-(Dimethylamino)ethyl)-1H-indol-5-yl)-N-methylmethanesulfonamide succinate; Migratriptan; Antibet; Arcoiran; Diletan; Imijekt; Novelian; Permicran; Sumadol; Sumatrin; Sumigrene; Migmax; Sumavel DosePro; Sumatriptan succinate [USAN]; GR 43175C; Alsuma; Sumatriptan (succinate); Zelrix; Imitrex Statdose; Sumatriptan Ga…	PORMUFZNYQJOEI-UHFFFAOYSA-N	CHEMBL1201150	SUMATRIPTAN SUCCINATE	Others	Others	5-HT Receptor; Others; Others	5-HT1B/1D receptor	5-HT	https://pubmed.ncbi.nlm.nih.gov/14741073/ "Sumatriptan: a receptor-targeted treatment for migraine."	hsa04726	G protein-coupled receptor	5-HT	5-HT Receptor
M92241	H	14	50	10	DMSO	1146-99-2	T0360	chlophenadione	G-25766; Indaliton; Chlorindione	Clc1ccc(cc1)C1C(=O)c2ccccc2C1=O	C15H9ClO2	256.69	Metabolism	Vitamin	VK	chlophenadione is a vitamin K antagonist, a potent anticoagulant compound.	King DA. Postgrad Med J. 1965 Dec;41(482):783-5.	70846	Clorindione; Chlorindione; 1146-99-2; Chlophenadione; Indaliton; 2-(4-Chlorophenyl)-1H-indene-1,3(2H)-dione; Chlorindionum; Chlor-athrombon; 2-(4-CHLOROPHENYL)INDANE-1,3-DIONE; chlorphenylindandione; chlorphenindone; 2-(4-chlorophenyl)indene-1,3-dione; Clorindiona; Clorindionum; Clorindione [INN:BAN]; Clorindionum [INN-Latin]; Clorindiona [INN-Spanish]; 2-(4-Chlorofenil)-1,3-indandione; 2-(4-Chlo…	NJDUWAXIURWWLN-UHFFFAOYSA-N	CHEMBL278519	CLORINDIONE	Others	Others	Vitamin; Others; Others	Vitamin K epoxide reductase complex 1	VKORC1	https://www.ncbi.nlm.nih.gov/pmc/articles/PMC1855257/	hsa00130	Enzyme	VKOR	Vitamin
M92241	H	15	50	10	DMSO	111025-46-8	T0214	Pioglitazone	U 72107	CCc1ccc(CCOc2ccc(CC3SC(=O)NC3=O)cc2)nc1	C19H20N2O3S	356.44	Apoptosis; Cell Cycle/Checkpoint; DNA Damage/DNA Repair; Metabolism	Ferroptosis; PPAR	Ferroptosis; PPAR	Pioglitazone is an insulin sensitizing agent and thiazolidinedione that is indicated for the treatment of type 2 diabetes. Pioglitazone has been linked to rare instances of acute liver injury.	Jaakkola T, et al. Basic Clin Pharmacol Toxicol,2006, 99(1), 44-51.	4829	Pioglitazone; 111025-46-8; Actos; Glustin; 105355-27-9; Zactos; Pioglitazona; Pioglitazonum; Pioglitazonum [INN-Latin]; 5-(4-(2-(5-ethylpyridin-2-yl)ethoxy)benzyl)thiazolidine-2,4-dione; Pioglitazona [INN-Spanish]; AD-4833; U 72107; Pioglitazone [BAN:INN]; Pioglitazone [INN:BAN]; Pioglitazone (Actos); sepioglin; Piozone; Pioglu; 5-[[4-[2-(5-Ethyl-2-pyridinyl)ethoxy]phenyl]methyl]-2,4-thiazolidine…	HYAFETHFCAUJAY-UHFFFAOYSA-N	CHEMBL595	PIOGLITAZONE	Others	Others	Ferroptosis; PPAR; Others; Others	Peroxisome proliferator-activated receptor gamma	PPARÎ³	https://pubchem.ncbi.nlm.nih.gov/compound/Pioglitazone#section=Pharmacology-and-Biochemistry	hsa03320	Nuclear Receptor	PPAR	Ferroptosis
M92241	H	16	50	10	DMSO	541-46-8	T0361	Isovaleramide	3-Methylbutanamide	CC(C)CC(=O)N	C5H11NO	101.15	Metabolism	Dehydrogenase	Alcohol DHO	Isovaleramide is an anticonvulsant molecule isolated from Valeriana pavonii, which can inhibit the liver alcohol dehydrogenases.	Giraldo SE, et al. Biomedica, 2010, 30(2), 245-250.	10930	ISOVALERAMIDE; 3-Methylbutanamide; 541-46-8; Butanamide, 3-methyl-; 3-Methylbutyramide; Isopentanamide; Isovaleric amide; Isovaleric acid amide; beta-Methylbutyramide; Isovaleramide [USAN]; NFS1776; NPS 1776; .beta.-Methylbutyramide; NPS-1776; EINECS 208-781-1; NSC 402555; NSC-402555; BRN 1740789; UNII-9CP4KB634M; 9CP4KB634M; NFS-1776; Isovaleramide (USAN); 3-methylbutaneamide; ISOVALERAMIDE [MI]…	SANOUVWGPVYVAV-UHFFFAOYSA-N	CHEMBL171066	ISOVALERAMIDE	Others	Others	Dehydrogenase; Others; Others	Dehydrogenase				Enzyme	Dehydrogenase	Dehydrogenase
M92241	H	17	50	10	DMSO	177834-92-3	T0216	Eletriptan HBr	Eletriptan hydrobromide; UK-116044	CN1CCC[C@@H]1Cc1c[nH]c2c1cc(CCS(=O)(=O)c1ccccc1)cc2.Br	C22H27BrN2O2S	463.43	GPCR/G Protein; Neuroscience	5-HT Receptor	5-HT Receptor; 5-HT1B; 5-HT1D	Eletriptan hydrobromide is an orally active agonist with specific affinity for the 5-hydroxytriptamine1B/1D receptor.	Napier C, et al. Eur J Pharmacol, 1999, 368(2-3), 259-268.	656631	Eletriptan hydrobromide; 177834-92-3; Eletriptan HBr; Relpax; Eletriptan Hydrobromide [USAN]; Eletriptan (hydrobromide); (R)-3-((1-Methylpyrrolidin-2-yl)methyl)-5-(2-(phenylsulfonyl)ethyl)-1H-indole hydrobromide; eletriptan monohydrobromide; UNII-M41W832TA3; CHEBI:61176; UK 116044-04; M41W832TA3; UK-116,044-04; (R)-3-((1-Methyl-2-pyrrolidinyl)methyl)-5-(2-(phenylsulfonyl)ethyl)-1H-indole monohydr…	UTINOWOSWSPFLJ-FSRHSHDFSA-N	CHEMBL1201003	ELETRIPTAN HYDROBROMIDE	Others	Others	5-HT Receptor; Others; Others	5-HT1B/1D receptor	5-HT1	https://www.accessdata.fda.gov/drugsatfda_docs/label/2002/21119se1-009_relpax_lbl.pdf	hsa04726	G protein-coupled receptor	5-HT	5-HT Receptor
M92241	H	18	50	10	DMSO	53885-35-1	T0362	Ticlopidine hydrochloride	Ticlopidine HCl; Ticlodix; Ticlodone	Cl.Clc1ccccc1CN1CCc2c(C1)ccs2	C14H15Cl2NS	300.25	Neuroscience	AChR; P2 Receptor	Adenosine Receptor; P2 receptor	Ticlopidine hydrochloride is an effective inhibitor of platelet aggregation commonly used in the placement of STENTS in CORONARY ARTERIES.	Thebault JJ, et al. Clin Pharmacol Ther, 1975, 18(4), 485-490.	65335	TICLOPIDINE HYDROCHLORIDE; 53885-35-1; Ticlopidine HCL; Ticlid; Ticlodix; Ticlodone; Panaldine; Tiklid; 5-(2-chlorobenzyl)-4,5,6,7-tetrahydrothieno[3,2-c]pyridine hydrochloride; Ticlopidine (hydrochloride); 53-32C; 4-C-32; EINECS 258-837-4; NSC-759165; UNII-A1L4914FMF; 5-[(2-chlorophenyl)methyl]-4H,5H,6H,7H-thieno[3,2-c]pyridine hydrochloride; MLS000083578; A1L4914FMF; Tiklyd; Thieno(3,2-c)pyridi…	MTKNGOHFNXIVOS-UHFFFAOYSA-N	CHEMBL1717	TICLOPIDINE HYDROCHLORIDE	Others	Others	AChR; P2 Receptor; Others; Others	P2Y12 receptor	P2Y12	Savi P, Herbert JM. "Clopidogrel and ticlopidine: P2Y12 adenosine diphosphate-receptor antagonists for the prevention of atherothrombosis." Seminars in Thrombosis and Hemostasis. 31.2 (2005): 174-183.	hsa04015	G protein-coupled receptor	P2_Receptor	AChR
M92241	H	19	50	10	DMSO	181695-72-7	T0219	Valdecoxib	SC 65872	Cc1c(c(no1)c1ccccc1)c1ccc(cc1)S(=O)(=O)N	C16H14N2O3S	314.36	Immunology/Inflammation; Neuroscience	COX	COX; COX-2	Valdecoxib is a prescription drug used in the treatment of osteoarthritis, rheumatoid arthritis, and painful menstruation and menstrual symptoms. It is classified as a nonsteroidal anti-inflammatory drug, or NSAID, and should not be taken by anyone allergic to these types of medications.	Talley JJ, et al. J Med Chem, 2000, 43(5), 775-777.	119607	Valdecoxib; 181695-72-7; Bextra; 4-(5-methyl-3-phenylisoxazol-4-yl)benzenesulfonamide; Valdyn; SC 65872; SC-65872; 4-(5-Methyl-3-phenyl-4-isoxazolyl)benzenesulfonamide; Valdecoxib [USAN]; Kudeq; Benzenesulfonamide, 4-(5-methyl-3-phenyl-4-isoxazolyl)-; 4-(5-methyl-3-phenyl-1,2-oxazol-4-yl)benzenesulfonamide; Valecoxib; YM-974; 4-(5-methyl-3-phenyl-1,2-oxazol-4-yl)benzene-1-sulfonamide; HSDB 7302; …	LNPDTQAFDNKSHK-UHFFFAOYSA-N	CHEMBL865	VALDECOXIB	Others	Others	COX; Others; Others	Cyclooxygenase-2	COX-2	Warner TD, Mitchell JA. "Coxibs: selective cyclooxygenase-2 inhibitors and the emergence of a new therapeutic concept." Arthritis Research & Therapy 2.1 (2000): 5.	hsa00590	Enzyme	COX	COX
M92241	H	20	50	10	DMSO	50370-12-2	T0366	Cefadroxil	BL-S 578	CC1=C(N2[C@H](SC1)[C@H](NC(=O)[C@H](N)c1ccc(O)cc1)C2=O)C(=O)O	C16H17N3O5S	363.39	Microbiology/virology	Antibacterial; Antibiotic	Bacterial; Antibiotic; PBPs	Cefadroxil is a Cephalosporin Antibacterial. The chemical classification of cefadroxil anhydrous is Cephalosporins.	Williamson R, et al. Antimicrob Agents ChemOthers. 1980 Oct;18(4):629-37.	47965	cefadroxil; 50370-12-2; Cefadroxil anhydrous; Cephadroxil; Cefadroxilo; Cefadroxilum; D-Cefadroxil; BL-S 578; Cefadroxil [INN]; BL-S578; Cefadroxilum [INN-Latin]; Cefadroxilo [INN-Spanish]; Anhydrous cefadroxil; Sumacef (TN); CHEBI:3479; S 578; S-578; (6R,7R)-7-{[(2R)-2-amino-2-(4-hydroxyphenyl)acetyl]amino}-3-methyl-8-oxo-5-thia-1-azabicyclo[4.2.0]oct-2-ene-2-carboxylic acid; CDX; UNII-Q525PA8JJ…	BOEGTKLJZSQCCD-UEKVPHQBSA-N	CHEMBL1644	CEFADROXIL	Others	Others	Antibacterial; Antibiotic; Others; Others	Peptidoglycan synthesis enzymes		https://www.drugbank.ca/drugs/DB01140	map00550	Antibiotic	Peptidoglycan_synthesis_enzymes	Antibacterial
M92241	H	21	50	10	DMSO	63585-09-1	T0220	Foscarnet sodium	Phosphonoformate	C(=O)([O-])P(=O)([O-])[O-].[Na+].[Na+].[Na+]	CNa3O5P	191.95	Cell Cycle/Checkpoint; DNA Damage/DNA Repair; Microbiology/virology	DNA/RNA Synthesis; Reverse Transcriptase; Virus Protease	Reverse Transcriptase; Virus Protease; DNA/RNA Synthesis	Foscarnet sodium is an antiviral agent used in the treatment of cytomegalovirus retinitis. Foscarnet also shows activity against human herpesviruses and HIV.	Oberg B. Pharmacol Ther, 1989, 40(2), 213-285.	44561	FOSCARNET SODIUM; 63585-09-1; Foscavir; Trisodium phosphonoformate; Triapten; Trisodium carboxyphosphate; Foscarnet sodique; Foscarneto sodico; Foscarnetum natricum; Foscarnet sodico; EHB 776; Foscarnet sodico [Spanish]; Foscarnet sodique [French]; Phosphonoformate; Foscarnetum natricum [Latin]; Phosphonoformic acid, trisodium salt; Foscarnetsodium; Virudin; Gefin; Sodium phosphonatoformate; Fosc…	DFHAXXVZCFXGOQ-UHFFFAOYSA-K	CHEMBL754	FOSCARNET SODIUM	Others	Others	DNA/RNA Synthesis; Reverse Transcriptase; Virus Protease; Others; Others	DNA Polymerase / Reverse Transcriptase	DNAP/RT	Gilbert C, Bestman-Smith J, Boivin G. "Resistance of herpesviruses to antiviral drugs: clinical impacts and molecular mechanisms." Drug Resistance Updates 4.2 (2001): 88-114. https://doi.org/10.1054/drup.2001.0187	hsa04512	Enzyme Inhibitor	DNA/RNA_Associated	DNA/RNA Synthesis
M92241	H	22	50	10	DMSO	67-73-2	T0367	Fluocinolone acetonide	Flucort-N	F[C@]12[C@H]([C@H]3[C@@]([C@@]4(OC(O[C@@H]4C3)(C)C)C(=O)CO)(C[C@@H]2O)C)C[C@H](F)C2=CC(=O)C=C[C@]12C	C24H30F2O6	452.49	Endocrinology/Hormones	Glucocorticoid Receptor	Glucocorticoid Receptor	Fluocinolone acetonide is a glucocorticoid derivative used topically in the treatment of various skin disorders. It is usually employed as a cream, gel, lotion, or ointment. It has also been used topically in the treatment of inflammatory eye, ear, and nose disorders.	http://en.wikipedia.org/wiki/Fluocinolone_acetonide	6215	FLUOCINOLONE ACETONIDE; 67-73-2; Synalar; Fluonid; Flucinar; Synandone; Jellin; Synamol; Synemol; Coriphate; Fluovitif; Flupollon; Percutina; Synandrone; Dermalar; Localyn; Omniderm; Radiocin; Retisert; Sinalar; Synotic; Tefunote; Synsac; Fluotrex; Fluocet; Derma-smoothe/fs; Synalar-HP; Localyn Syntex; Cortiplastol; Iluvien; Prodermin; Capex; Flucort; Fs Shampoo; Fluocinolone 16,17-acetonide; Flu…	FEBLZLNTKCEFIT-VSXGLTOVSA-N	CHEMBL989	FLUOCINOLONE ACETONIDE	Others	Others	Glucocorticoid Receptor; Others; Others	Glucocorticoid Receptor	GR	https://www.ncbi.nlm.nih.gov/pmc/articles/PMC2964791/	hsa04927	Nuclear receptor	Glucocorticoid_Receptor	Glucocorticoid Receptor
M92241	I	3	50	10	DMSO	583-03-9	T0857	Fenipentol	1-phenylpentan-1-ol; 1-Phenyl-1-pentanol; 1-Phenylpentanol; Pancoral	CCCCC(O)c1ccccc1	C11H16O	164.25	Metabolism	Lipid	CES1	Fenipentol has the properties of Choleretics and Cholagogues.	Chey WY, et al. Gastroenterology. 1983 Jun;84(6):1578-84.	3338	fenipentol; 1-phenylpentan-1-ol; 1-Phenyl-1-pentanol; 583-03-9; Pancoral; 1-Phenylpentanol; alpha-Butylbenzyl alcohol; Phenylbutylcarbinol; Suiclisin; 1-Pentanol, 1-phenyl-; 1-Phenyl-1-hydroxypentane; PH BC; Benzenemethanol, .alpha.-butyl-; 1-Hydroxy-1-phenylpentane; Fenipentolum; PC 1; Fenipentol [INN:JAN]; alpha-Butylbenzenemethanol; Fenipentolum [INN-Latin]; NSC 8478; .alpha.-Butylbenzyl alcoh…	OVGORFFCBUIFIA-UHFFFAOYSA-N	CHEMBL2104321	FENIPENTOL	Others	Others	Lipid; Others; Others						Lipid	Lipid
M92241	I	4	50	10	DMSO	84-17-3	T0035	Dienestrol	Restrol; Dienoestrol; Dehydrostilbestrol; Cycladiene	C\C=C(\C(=C\C)\c1ccc(O)cc1)/c1ccc(O)cc1	C18H18O2	266.34	Endocrinology/Hormones	Estrogen Receptor/ERR; Estrogen/progestogen Receptor	ER; Estrogen Receptor/ERR	Dienestrol is a synthetic and nonsteroidal estrogen, which is an estrogen receptor agonist. Estrogens can increase a normal clear discharge from the vagina and make the vulva and urethra healthy.	Juriansz RL, et al. Y Res. 1988 Jan 1;48(1):14-8.	667476	dienestrol; Dienoestrol; Dehydrostilbestrol; Cycladiene; E,E-Dienestrol; Restrol; Dienol; Estraguard; Estroral; Follidiene; Oestrasid; Oestrodiene; Synestrol; 13029-44-2; 84-17-3; Estragard; Gynefollin; Oestroral; Dinovex; Retalon; (E,E)-Dienestrol; Estrodienol; Hormofemin; Dehydrostilboestrol; Oestrodienol; Dienesterol; Dinestrol; Follormon; Oestrovis; Sexadien; Teserene; Willnestrol; Agaldog; a…	NFDFQCUYFHCNBW-SCGPFSFSSA-N	CHEMBL1018	DIENESTROL	Others	Others	Estrogen Receptor/ERR; Estrogen/progestogen Receptor; Others; Others	Estrogen Receptor	ER	https://pubchem.ncbi.nlm.nih.gov/compound/Dienestrol	hsa04915	Receptor	Estrogen_Receptor	Estrogen Receptor/ERR
M92241	I	5	50	10	DMSO	586-98-1	T1112	2-(Hydroxymethyl)pyridine	Piconol	OCc1ccccn1	C6H7NO	109.13	Metabolism	PDE	PDE	2-Pyridinylmethanol is an organic compound.	Ducharme Y, et al. Bioorg Med Chem Lett. 2003 Jun 2;13(11):1923-6.	11474	2-PYRIDINEMETHANOL; 586-98-1; pyridin-2-ylmethanol; 2-(Hydroxymethyl)pyridine; Piconol; 2-Pyridylmethanol; 2-Pyridinylmethanol; Pyridine-2-methanol; 2-Pyridylcarbinol; 2-Pyridyl carbinol; Piconol [INN]; Pyridine-2-carbinol; alpha-Picolyl alcohol; 2-hydroxymethylpyridine; (Pyridin-2-yl)methanol; Piconolum [Latin]; MFCD00006348; Piconolum; Pyridin-2-Yl-Methanol; pyridine-methanol; 2-pyridine-methan…	SHNUBALDGXWUJI-UHFFFAOYSA-N	CHEMBL2103981	PICONOL	Others	Others	PDE; Others; Others						PDE	PDE
M92241	I	6	50	10	DMSO	138982-67-9	T0031	Ziprasidone hydrochloride monohydrate	CP 88059	Clc1c(cc2CC(=O)Nc2c1)CCN1CCN(c2nsc3ccccc23)CC1.Cl.O	C21H21ClN4OSÂ·HClÂ·H2O	467.12	GPCR/G Protein; Immunology/Inflammation; Neuroscience	5-HT Receptor; Adrenergic Receptor; Dopamine Receptor; Histamine Receptor; Norepinephrine	5-HT Receptor; Dopamine Receptor; 5-HT transporter; 5-HT1A; 5-HT1B; 5-HT1D; 5-HT2A; 5-HT2C; 5-HT6; 5-HT7; Î±1A-adrenergic receptor; Î±2A-adrenergic receptor; D1; D2; D3; H1 receptor; norepinephrine transporter (NET)	Ziprasidone(CP88059) is a united 5-HT (serotonin) and dopamine receptor antagonist which shows potent effects of the antipsychotic activity.	Seeger TF, et al. J Pharmacol Exp Ther. 1995 Oct;275(1):101-13.	60853	138982-67-9; Ziprasidone hydrochloride monohydrate; Ziprasidone hydrochloride; Geodon; 5-(2-(4-(Benzo[d]isothiazol-3-yl)piperazin-1-yl)ethyl)-6-chloroindolin-2-one hydrochloride hydrate; Ziprasidone HCl hydrate; ZIPRASIDONE HYDROCHLORIDE HYDRATE; Zeldox; Ziprasidone HCl monohydrate; Ziprasidone (hydrochloride monohydrate); Ziprasidone hydrochloride [USAN]; UNII-216X081ORU; CP 88,059-1; CP-88,059-…	ZCBZSCBNOOIHFP-UHFFFAOYSA-N	CHEMBL1375743	ZIPRASIDONE HYDROCHLORIDE	Others	Others	5-HT Receptor; Adrenergic Receptor; Dopamine Receptor; Histamine Receptor; Norepinephrine; Others; Others	Dopamine Receptor	DR	Stahl, S. M. (2010). Stahl's essential psychopharmacology: neuroscientific basis and practical applications (3rd ed.). Cambridge University Press.	hsa04080	G protein-coupled receptor	Dopamine	5-HT Receptor
M92241	I	7	50	10	DMSO	58-95-7	T1016	Vitamin E Acetate	Tocopherol acetate	c12c(c(c(c(c2C)C)OC(=O)C)C)CC[C@](O1)(CCC[C@@H](CCC[C@@H](CCCC(C)C)C)C)C	C31H52O3	472.76	Metabolism	Endogenous Metabolite; Vitamin	Endogenous Metabolite; VE	A natural tocopherol and one of the most potent antioxidant tocopherols. It exhibits antioxidant activity by virtue of the phenolic hydrogen on the 2 h-1-benzopyran-6-ol nucleus. It has four methyl groups on the 6-chromanol nucleus. The natural d form of alpha-tocopherol is more active than its synthetic dl-alpha-tocopherol racemic mixture.	Beijersbergen van Henegouwen GM, et al. J Photochem Photobiol B. 1995 Jul;29(1):45-51.	86472	Vitamin E acetate; alpha-Tocopherol acetate; 58-95-7; Tocopherol acetate; Alfacol; Tocopheryl acetate; D-alpha-tocopherol acetate; D-ALPHA-TOCOPHERYL ACETATE; Ecofrol; Contopheron; Tofaxin; Econ; Ephynal acetate; (+)-alpha-Tocopherol acetate; Tokoferol acetate; Evipherol; Fertilvit; Tocopherex; Tocophrin; Erevit; Gevex; Combinal E; Epsilan-M; E-Toplex; E-Ferol; Endo E Dompe; Ephynal; Spondyvit; J…	ZAKOWWREFLAJOT-CEFNRUSXSA-N	CHEMBL1047	TOCOPHEROL ACETATE	Others	Others	Endogenous Metabolite; Vitamin; Others; Others	Endogenous Metabolite, Vitamin				Vitamin	Metabolite	Endogenous Metabolite
M92241	I	8	50	10	DMSO	90-22-2	T0023	Valethamate bromide	Ediposin; Epidosin; Epidozin; Resitan	[Br-].CCC(C)C(C(=O)OCC[N+](C)(CC)CC)c1ccccc1	C19H32BrNO2	386.37	Others	Others	Others	Valethamate bromide is an anticholinergic agent that has antispasmodic effects and inhibits glandular secretion.	KÃ¶stÃ¼ B, et al. J Obstet Gynaecol. 2015 Aug 11:1-4.	7010	valethamate bromide; 90-22-2; Epidosin; Resitan; Ediposin; Epidozin; Murel; Valethamate (bromide); Valethamate bromide [JAN]; N,N-Diethyl-N-methyl-2-((3-methyl-2-phenylpentanoyl)oxy)ethanaminium bromide; EINECS 201-977-8; Diethyl(methyl)(2-(3-methyl-2-phenylvaleryloxy)ethyl)ammonium bromide; UNII-6XFR940M2A; diethyl(methyl){2-[(3-methyl-2-phenylpentanoyl)oxy]ethyl}azanium bromide; C19H32NO2.Br; V…	CEJGGHKJHDHLAZ-UHFFFAOYSA-M	CHEMBL2107687	VALETHAMATE BROMIDE	Others	Others	Others; Others; Others						Others	Others
M92241	I	9	50	10	DMSO	59-26-7	T0048	Nikethamide	N,N-Diethylnicotinamide; Corvotone; Corvin; Anacardone	CCN(CC)C(=O)c1cnccc1	C10H14N2O	178.23	Membrane transporter/Ion channel; Neuroscience	GABA Receptor	GABAR	Nikethamide is a stimulant which mainly influences the respiratory cycle. Widely known by its former sales name of Coramine, it was used in the mid-twentieth century as a medical countermeasure against tranquilizer overtreatments, before the advent of endotracheal intubation and positive-pressure lung expansion. It is now thought to be of no value for such purposes, and may be dangerous.	ECKENHOFF JE, HAFKENSCHIEL JH. J Pharmacol Exp Ther. 1947 Dec;91(4):362-9.	5497	Nikethamide; N,N-DIETHYLNICOTINAMIDE; 59-26-7; Anacardone; Nicethamide; Coramine; Nikethyl; Corvotone; Corvin; 3-Pyridinecarboxamide, N,N-diethyl-; Anacordone; Carbamidal; Nicamide; Nicetamide; Nicorine; Pyricardyl; Niamine; Nicotinic acid diethylamide; Camphozone; Canfodiamina; Cardiamide; Cardiamina; Cardiamine; Coraetamidum; Coraethamide; Coraethamidum; Cordiamine; Corethamide; Dynamicarde; Ni…	NCYVXEGFNDZQCU-UHFFFAOYSA-N	CHEMBL2104607	NIKETHAMIDE	Others	Others	GABA Receptor; Others; Others	GABA Receptor (due to lack of specific evidence for Nikethamide, this is considered the best fit from the defaults provided, assuming Nikethamide's mechanism might involve modulation of central nervous system activity indirectly rather than direct binding to a specific receptor.)	GABA Receptor			Receptor	GABA	GABA Receptor
M92241	I	10	50	10	DMSO	125-33-7	T0024	Primidone	NCI-C56360; Primaclone; Mysoline	CCC1(C(=O)NCNC1=O)c1ccccc1	C12H14N2O2	218.26	Membrane transporter/Ion channel; Neuroscience	AChR; GABA Receptor; GluR; Sodium Channel	nAChR; GABAR; GluR2; Sodium Channel	Primidone is an anticonvulsant of the pyrimidinedione class.	Yamakura T, et al. Annu Rev Pharmacol Toxicol. 2001;41:23-51.	4909	primidone; 125-33-7; Primaclone; Mysoline; Lepimidin; 2-Deoxyphenobarbital; Liskantin; Mylepsinum; Lepsiral; Misodine; Mizodin; Mylepsin; Neurosyn; Sertan; 2-Desoxyphenobarbital; Hexadiona; Majsolin; Milepsin; Misolyne; Prilepsin; Primakton; Primidon; Primoline; Prysoline; Resimatil; Midone; Mizolin; Mysedon; Cyral; Medi-Pets; Primacone; Desoxyphenobarbitone; Pyrimidone Medi-pets; Primacione; Pri…	DQMZLTXERSFNPB-UHFFFAOYSA-N	CHEMBL856	PRIMIDONE	Others	Others	AChR; GABA Receptor; GluR; Sodium Channel; Others; Others	GABA Receptor	GABA-A	Johannessen SI, Tomson T. "Pharmacokinetic variability of newer antiepileptic drugs: when is monitoring needed?" Clinical Pharmacokinetics, 2006;45(11):1061-75.	hsa04080	Ion channel	GABA	AChR
M92241	I	11	50	10	DMSO	59-52-9	T0781	Dithiopropanol	Dicaptol	OCC(S)CS	C3H8OS2	124.22	Microbiology/virology; Proteases/Proteasome	HIV Protease	Cadmium; Mercury; HIV	An anti-gas warfare agent that is effective against Lewisite (dichloro(2-chlorovinyl)arsine) and formerly known as British Anti-Lewisite or BAL. It acts as a chelating agent and is used in the treatment of arsenic, gold, and other heavy metal poisonings.	Flora SJ, et al. Int J Environ Res Public Health. 2010, 7(7):2745-88.	3080	DIMERCAPROL; 2,3-Dimercapto-1-propanol; 59-52-9; 2,3-Dimercaptopropanol; Dithioglycerine; Dicaptol; Sulfactin; 2,3-Dithiopropanol; dimercaptopropanol; 1,2-Dithioglycerol; Dimersol; Antoxol; Panobal; British Anti-Lewisite; British antilewisite; Dimercaprolum; Dithioglycerol; 1-Propanol, 2,3-dimercapto-; 1,2-Dimercapto-3-propanol; 3-Hydroxy-1,2-propanedithiol; Dimercaprol propanol; 2,3-Dimercaptol-…	WQABCVAJNWAXTE-UHFFFAOYSA-N	CHEMBL1597	DIMERCAPROL	Others	Others	HIV Protease; Others; Others						HIV	HIV Protease
M92241	I	12	50	10	DMSO	52-86-8	T0025	Haloperidol	Haldol; Aloperidin; Serenace	OC1(CCN(CCCC(=O)c2ccc(F)cc2)CC1)c1ccc(Cl)cc1	C21H23ClFNO2	375.87	GPCR/G Protein; Neuroscience	5-HT Receptor; Dopamine Receptor	5-HT; Dopamine; Dopamine Receptor	Haloperidol is a highly potent neuroleptic by relieving nervous through the depression of nerve function. In addition, haloperidol has shown about 50-fold efficacy than chlorpromazine, another antipsychotic drug. Haloperidol has some potencies in the treatment of delusions and hallucinations. Its effects are primarily attained through blocking dopamine receptors in the mesocortex and limbic syste…	Cai G, et al. Mol Pharmacol. 1999 Nov;56(5):989-96.	3559	haloperidol; 52-86-8; Haldol; Serenace; Aloperidin; Eukystol; Aloperidol; Brotopon; Serenase; Serenelfi; Linton; Dozic; Einalon S; Aloperidolo; Galoperidol; Halopoidol; Halojust; Halopal; Keselan; Mixidol; Ulcolind; Uliolind; Pernox; Sernas; Sernel; Aldo; Bioperidolo; Lealgin compositum; Sigaperidol; Peluces; Haldol Solutab; Aloperidon; Haloperidolum; Fortunan; Halosten; McN-JR-1625; 4-[4-(4-chlo…	LNEPOXFFQSENCJ-UHFFFAOYSA-N	CHEMBL54	HALOPERIDOL	Others	Others	5-HT Receptor; Dopamine Receptor; Others; Others	Dopamine Receptor	DR	https://pubchem.ncbi.nlm.nih.gov/compound/Haloperidol#section=Pharmacology-and-Biochemistry	hsa04080	G protein-coupled receptor	Dopamine	5-HT Receptor
M92241	I	13	50	10	DMSO	1960-12-08	T0011	Phenethyl alcohol	Benzyl carbinol; 2-Phenylethanol; 2-Phenylethyl alcohol; Benzeneethanol; Phenylethanol	OCCC1=CC=CC=C1	C8H10O	122.16	Microbiology/virology	Antibacterial; Antibiotic; Virus Protease	Bacterial; Virus Protease; Antibiotic	Phenethyl alcohol is an antimicrobial, antiseptic, and disinfectant. It is used also as an aromatic essence and preservative in pharmaceutics and perfumery.	Lingappa BT, et al. Science. 1969 Jan 10;163(3863):192-4.	6054	2-PHENYLETHANOL; Phenethyl alcohol; Phenylethyl alcohol; 60-12-8; Benzeneethanol; Phenylethanol; Benzyl carbinol; Phenethanol; 2-Phenylethyl alcohol; 2-PHENYL-ETHANOL; beta-Phenylethanol; 2-Phenethyl alcohol; Benzylmethanol; 2-Phenylethan-1-Ol; Benzylcarbinol; Methanol, benzyl-; 2-Hydroxyethylbenzene; 1-Phenyl-2-ethanol; Ethanol, 2-phenyl-; FEMA No. 2858; 2-PEA; Benzenethanol; Phenethylalcohol; P…	WRMNZCZEMHIOCP-UHFFFAOYSA-N	CHEMBL448500	PHENYLETHYL ALCOHOL	Others	Others	Antibacterial; Antibiotic; Virus Protease; Others; Others	Antibacterial		https://www.ncbi.nlm.nih.gov/pmc/articles/PMC6017505/		Antimicrobial agent	Antibacterial	Antibacterial
M92241	I	14	50	10	DMSO	152-47-6	T0026	Sulfalen	AS-18908; Sulfalene(SMPZ); Sulfametopyrazine; Butadiene sulfone; 3-Sulfolene; SMP2	COc1nccnc1NS(=O)(=O)c1ccc(N)cc1	C11H12N4O3S	280.3	Autophagy; Microbiology/virology	Antibacterial; Antibiotic; Autophagy; Parasite	DHPS; Parasite; Bacterial; Antibiotic	Sulfalene, a long-acting sulfonamide antibiotic, is used for the therapy of chronic bronchitis, urinary tract infections, and malaria.	Brumfitt W, Hamilton-Miller JM. J ChemOthers. 1993 Dec;5(6):465-9	9047	SULFALENE; 152-47-6; Sulfamethoxypyrazine; Sulfametopyrazine; Sulfamethopyrazine; Sulfalen; 4-amino-N-(3-methoxypyrazin-2-yl)benzenesulfonamide; Kelfizine; Sulfapyrazinemethoxine; Sulfapyrazinemethoxyne; Kelfizin; Kelfizina; Dalysep; Sulfapyrazinemethoxyine; Kelfizine W; SMP2; 3-Methoxy-2-sulfapyrazine; Sulfalenum; 2-Sulfanilamido-3-methoxypyrazine; 3-Methoxy-2-sulfanilamidopyrazine; Farmitalia 2…	KXRZBTAEDBELFD-UHFFFAOYSA-N	CHEMBL1525826	SULFALENE	Others	Others	Antibacterial; Antibiotic; Autophagy; Parasite; Others; Others	Dihydropteroate synthase	DHPS	https://pubchem.ncbi.nlm.nih.gov/compound/Sulfalen#section=Biological-Test-Results	map00790 (Folate biosynthesis)	enzyme	Dihydropteroate_Synthase	Antibacterial
M92241	I	15	50	10	DMSO	637-07-0	T1298	Clofibrate	Ethyl clofibrate; Clofibratum; Clofibrato	c1(OC(C(=O)OCC)(C)C)ccc(cc1)Cl	C12H15ClO3	242.7	DNA Damage/DNA Repair; Metabolism	PPAR	PPAR; PPARÎ±	Clofibrate is an aryloxyisobutyric acid derivate with antihyperlipidemic activity.	Casas F, et al. FEBS Lett. 2000, 478(1-2):4-8.	2796	clofibrate; 637-07-0; Ethyl 2-(4-chlorophenoxy)-2-methylpropanoate; Ethyl clofibrate; Atromid; Clofibratum; Atromid-S; Clofibrato; Liprin; Miscleron; EPIB; Angiokapsul; Antilipid; Antilipide; Arterioflexin; Arterosol; Ateriosan; Athebrate; Atheromide; Atheropront; Chlorphenisate; Clofibate; Lipofacton; Ticlobran; Amotril; Anparton; Ateculon; Atrolen; Atromida; Lipavil; Lipavlon; Lipomid; Liprinal…	KNHUKKLJHYUCFP-UHFFFAOYSA-N	CHEMBL565	CLOFIBRATE	Others	Others	PPAR; Others; Others	Peroxisome proliferator-activated receptor alpha	PPARÎ±	Willson TM, Brown PJ, Sternbach DD, Henke BR. "The PPARs: from orphan receptors to drug discovery." Journal of Medicinal Chemistry. 2000 Jun 15;43(13):527-50.	hsa03320	Transcription factor	PPAR	PPAR
M92241	I	16	50	10	DMSO	924-49-2	T0028	4-Amino-3-hydroxybutyric Acid	3-Hydroxy-GABA	NCC(O)CC(=O)O	C4H9NO3	119.12	Microbiology/virology; Proteases/Proteasome	HIV Protease	HIV-1	4-Amino-3-Hydroxybutanoic Acid is used as a chiral reagent in the synthesis of antiepileptic and hypotensive drug GABOB and analogues. Also used in the preparation of HIV-1 inhibitors derived from Betulinic Acid (B330250).	Candela M, et al. J Chromatogr A. 2000 Aug 25;890(2):273-80.	2149	924-49-2; 4-Amino-3-hydroxybutanoic acid; 4-Amino-3-hydroxybutyric acid; Gabob; DL-4-Amino-3-hydroxybutyric acid; Gamibetal; 352-21-6; Gabomade; 3-Hydroxy-GABA; Gamma-amino-beta-hydroxybutyric acid; Buksamin; Gaboril; Butanoic acid, 4-amino-3-hydroxy-; Gabimex; Gaminal; Idramina; Bogil; Buxamin; Buxamine; Gabobe; beta-Oxy-gaba; 3-Hydroxy-4-aminobutyric acid; 3-hydroxy-4-amino-butyric acid; Buxami…	YQGDEPYYFWUPGO-UHFFFAOYSA-N	CHEMBL93515	GAMMA-AMINO-BETA-HYDROXYBUTYRIC ACID	Others	Others	HIV Protease; Others; Others						HIV	HIV Protease
M92241	I	17	50	10	DMSO	64-04-0	T2935	Phenethylamine	2-Phenylethanamine; 2-Phenylethylamine; Î²-Phenylethylamine; benzeneethanamine; Î²-aminoethylbenzene	NCCc1ccccc1	C8H11N	121.18	Metabolism	Endogenous Metabolite	Endogenous Metabolite	Phenylethylamine functions as a monoaminergic neuromodulator and, to a lesser extent, a neurotransmitter in the human central nervous system.	Le Roux G, et al. Drug Alcohol Depend. 2015 Sep 1;154:46-53.	1001	Phenethylamine; 2-phenylethylamine; 2-Phenylethanamine; 64-04-0; Benzeneethanamine; 2-Phenethylamine; phenylethylamine; beta-phenylethylamine; beta-Phenethylamine; 1-Amino-2-phenylethane; beta-Aminoethylbenzene; (2-Aminoethyl)benzene; 1-Phenyl-2-aminoethane; 2-Amino-1-phenylethane; Ethanamine, 2-phenyl-; Ethylamine, 2-phenyl-; 1-Phenyl-2-amino-athan; 2-Fenylethylamin; 2-Amino-fenylethan; 2-Phenyl…	BHHGXPLMPWCGHP-UHFFFAOYSA-N	CHEMBL610	PHENETHYLAMINE	Others	Others	Endogenous Metabolite; Others; Others	Trace amine-associated receptor 1	TAAR1	Zucchi, R., Chiellini, G., Scanlan, T. S., & Grandy, D. K. (2006). Trace amine-associated receptors and their ligands. British Journal of Pharmacology, 149(8), 967â€“978. https://doi.org/10.1038/sj.bjp.0706948	hsa04080	G protein-coupled receptor	Trace_amine-associated_receptor_1	Endogenous Metabolite
M92241	I	18	50	10	DMSO	59-46-1	T0029	Procaine	Novocaine; Vitamin H3; Duracaine; Spinocaine	CCN(CC)CCOC(=O)c1ccc(N)cc1	C13H20N2O2	236.32	Cell Cycle/Checkpoint; Chromatin/Epigenetic; DNA Damage/DNA Repair; Membrane transporter/Ion channel	DNA/RNA Synthesis; Histone Demethylase; Sodium Channel	Histone Demethylase; DNA/RNA Synthesis; Sodium Channel	Procaine is a local anesthetic of the ester type that has a slow onset and a short duration of action. It is mainly used for infiltration anesthesia, peripheral nerve block, and spinal block.	Rigon AR, et al. Gen Pharmacol. 1996, 27(4):647-50.	4914	procaine; 59-46-1; 2-(Diethylamino)ethyl 4-aminobenzoate; Spinocaine; Vitamin H3; Novocaine; Duracaine; Procain; Nissocaine; Procaine, base; Procaina; Procainum; Novocain; Gerovital; Norocaine; 2-Diethylaminoethyl p-aminobenzoate; 2-Diethylaminoethyl 4-aminobenzoate; Diethylaminoethyl p-aminobenzoate; Benzoic acid, 4-amino-, 2-(diethylamino)ethyl ester; p-Aminobenzoyldiethylaminoethanol; Factor H…	MFDFERRIHVXMIY-UHFFFAOYSA-N	CHEMBL569	PROCAINE	Others	Others	DNA/RNA Synthesis; Histone Demethylase; Sodium Channel; Others; Others	Sodium Channel	NaV	"Local anesthetics: interaction with voltage-gated sodium channels and their implication for the central nervous system." Brazilian Journal of Anesthesiology, vol. 65, no. 1, 2015, pp. 73-79.	hsa04514	Ion channel	Sodium_Channel	DNA/RNA Synthesis
M92241	I	19	50	10	DMSO	7554-65-6	T0765	4-Methylpyrazole	Fomepizole; Antizol; Antizol-Vet	Cc1c[nH]nc1	C4H6N2	82.1	Metabolism; Neuroscience; oxidation-reduction	AChR; CAT; P450	ADH; CAT; Cytochrome P450	Fomepizole is used as an antidote in confirmed or suspected methanol or ethylene glycol poisoning. Fomepizole is a competitive inhibitor of alcohol dehydrogenase, the enzyme that catalyzes the initial steps in the metabolism of ethylene glycol and methanol to their toxic metabolites.	Nagata H, et al. Am J Physiol. 1996 Dec;271(6 Pt 1):G1028-33.	3406	4-Methylpyrazole; fomepizole; 4-Methyl-1H-pyrazole; 7554-65-6; Antizol; 1H-Pyrazole, 4-methyl-; 4-Methylpyrazol; Fomepizol; Fomepizolum; Fomepizol [INN-Spanish]; Fomepizolum [INN-Latin]; Antizol-vet; 4-methyl pyrazole; Fomepizole [USAN:INN]; 4-MP; PYRAZOLE, 4-METHYL-; C4H6N2; MFCD00005245; Antizol (TN); CHEBI:5141; EINECS 231-445-0; UNII-83LCM6L2BY; NSC-760365; BRN 0105204; homepizoru; 83LCM6L2BY…	RIKMMFOAQPJVMX-UHFFFAOYSA-N	CHEMBL1308	FOMEPIZOLE	Others	Others	AChR; CAT; P450; Others; Others	Alcohol dehydrogenase	ADH	https://pubmed.ncbi.nlm.nih.gov/3884397/	hsa00010 (Glycolysis / Gluconeogenesis)	Enzyme	Alcohol_dehydrogenase	AChR
M92241	I	20	50	10	DMSO	18010-40-7	T0030	Bupivacaine hydrochloride	Bupivacaine HCl; Vivacaine	Cl.CCCCN1CCCCC1C(=O)Nc1c(C)cccc1C	C18H28N2OÂ·HCl	324.89	Membrane transporter/Ion channel	Sodium Channel	Sodium Channel	Bupivacaine HydrochlorideÂ is a long-acting, amide-type local anesthetic. Bupivacaine reversibly binds to specificÂ sodium ionÂ channels in the neuronal membrane, resulting in a decrease in the voltage-dependent membrane permeability toÂ sodiumÂ ions and membrane stabilization; inhibition of depolarization and nerve impulse conduction; and a reversible loss of sensation.	Sheets MF, et al. Trends Cardiovasc Med. 2010 Jan;20(1):16-21.	64737	Bupivacaine hydrochloride; Bupivacaine HCL; 18010-40-7; 14252-80-3; Sensorcaine; Carbostesin; 1-butyl-N-(2,6-dimethylphenyl)piperidine-2-carboxamide hydrochloride; Bupivacaine (hydrochloride); Marcain; Bicain; AH-2250; Marcaine Spinal; (+-)-Bupivacaine hydrochloride; Bupivacaine hydrochloride [JAN]; MNarcaine hydrochloride; Bupivacaine hydrochloride anhydrous; EINECS 241-917-8; LAC-43; NSC-758631…	SIEYLFHKZGLBNX-UHFFFAOYSA-N	CHEMBL1200396	BUPIVACAINE HYDROCHLORIDE	Others	Others	Sodium Channel; Others; Others	Sodium Channel	NaV	Hollmann MW, Durieux ME. "Local anesthetics and the inflammatory response: a new therapeutic indication?" Anesthesiology 93.3 (2000): 858-875.	hsa04080	Ion channel	Sodium_Channel	Sodium Channel
M92241	I	21	50	10	DMSO	76-49-3	T1246	(-)-Bornyl Acetate	Isobornyl acetate; Bornyl acetic ether; 2-Camphanol acetate	CC(=O)O[C@@H]1C[C@@H]2CC[C@@]1(C)C2(C)C.CC(=O)O[C@H]1C[C@H]2CC[C@]1(C)C2(C)C	C12H20O2	196.29	Apoptosis; Immunology/Inflammation	Apoptosis; IL Receptor	Apoptosis; IL receptor	Bornyl acetate has an anti-inflammatory effect. It is the primary volatile ingredient in some Chinese traditional herbs and numerous conifer oils.	Yang H, et al. IUBMB Life. 2014 Dec;66(12):854-9.	76955985		DYTSXYJULYDSMX-ORFVEUCNSA-N			Others	Others	Apoptosis; IL Receptor; Others; Others						Apoptosis_Autophagy	Apoptosis
M92241	I	22	50	10	DMSO	6018-19-5	T0020	Sodium 4-aminosalicylate dihydrate	4-Amino-salicylic acid sodium salt; Sodium 4-Aminosalicylate	O.[Na+].Nc1cc(O)c(cc1)C(=O)[O-].O	C7H6NNaO3Â·2H2O	211.15	Microbiology/virology; NF-ÎºB; oxidation-reduction	Antibacterial; Antibiotic; Free radical scavengers; NF-ÎºB	Bacterial; Antibiotic; Free radical scavengers; NF-ÎºB	Aminosalicylate Sodium is the sodium salt form of aminosalicylic acid, an analog of para-aminobenzoic acid (PABA) with antitubercular activity. Aminosalicylate sodium exerts its bacteriostatic activity against Mycobacterium tuberculosis by competing with PABA for enzymes involved in folate synthesis, thereby suppressing growth and reproduction of M. tuberculosis, eventually leading to cell death.	Dinis TC, et al. Arch Biochem Biophys, 1994, 315(1), 161-169.	16211148	6018-19-5; Sodium 4-aminosalicylate dihydrate; sodium 4-amino-2-hydroxybenzoate dihydrate; Parasal sodium; AMINOSALICYLATE SODIUM; Sodium aminosalicylate; 4-Aminosalicylic acid sodium salt dihydrate; Benzoic acid, 4-amino-2-hydroxy-, monosodium salt, dihydrate; Nemasol sodium; Paramisan sodium; TEEBACIN; Sodium 4-aminosalicylate (dihydrate); Aminacyl; Sodium Aminosalicylate Dihydrate; Sodium P.A.…	GMUQJDAYXZXBOT-UHFFFAOYSA-M	CHEMBL2096646	AMINOSALICYLATE SODIUM	Others	Others	Antibacterial; Antibiotic; Free radical scavengers; NF-ÎºB; Others; Others	NF-ÎºB	NF-ÎºB	https://www.sciencedirect.com/science/article/pii/S0006291X04021075 (Ghosh, S, May, MJ, Kopp, EB. NF-ÎºB and Rel proteins: evolutionarily conserved mediators of immune responses. Annu. Rev. Immunol. 2002; 16:225-260.)	hsa04064	Transcription factor	NFkB	Antibacterial
M92241	J	3	50	10	DMSO	444-27-9	T0221	Thioproline	1,3-Thiazolidine-4-carboxylic acid; Thiazolidine-4-carboxylic acid; Detoxepa; Hepalidine	OC(=O)C1CSCN1	C4H7NO2S	133.17	GPCR/G Protein	Annexin A	Annexin A5	Timonacic has been used in trials studying the treatment of HIV Infections.	Barba-Espin G, et al. Plant Physiol Biochem. 2012 Oct;59:30-6.	9934	Timonacic; Thiazolidine-4-carboxylic acid; 444-27-9; 1,3-Thiazolidine-4-carboxylic acid; Detoxepa; Hepalidine; Thioproline; 4-THIAZOLIDINECARBOXYLIC ACID; Tiazolidin; Heparegene; Norgamem; Thiaproline; DL-Thiaproline; 4-Carboxythiazolidine; L-Thiazolidine-4-carboxylic acid; Norgamen; USAF C-1; T-4CA; Timonacic [INN]; Heptaladine; Timonacicum; Hepaldine; Heparegen; Timonacico; USAF A-3701; DL-Thia…	DZLNHFMRPBPULJ-UHFFFAOYSA-N	CHEMBL358722	TIMONACIC	Others	Others	Annexin A; Others; Others						Annexin_A	Annexin A
M92241	J	4	50	10	DMSO	26328-04-1	T0368	Cinepazide maleate	MD-67350; Vasodistal; Brendil	COc1cc(/C=C/C(=O)N2CCN(CC(=O)N3CCCC3)CC2)cc(OC)c1OC.C(=C\C(=O)O)\C(=O)O	C22H31N3O5Â·C4H4O4	533.57	Membrane transporter/Ion channel; Metabolism	Calcium Channel	Calcium Channel	Cinepazide maleate, a maleate salt form of cinepazide, is a vasodilator.	Akashi A, et al. Nihon Yakurigaku Zasshi. 1979, 75(5), 507-516.	5282458	cinepazide maleate; 26328-04-1; Brendil; Vasodistal; Cinepazide maleate [JAN]; Maleate de cinepazide; Cinepazide (Maleate); 28044-44-2; EINECS 248-795-5; UNII-Y35B3VA60V; MD 67350; Y35B3VA60V; Maleate de cinepazide [French]; 26328-04-1 (maleate); EINECS 247-613-1; 1-((Pyrrolidin-1-ylcarbonyl)methyl)-4-(3,4,5-trimethoxycinnamoyl)piperazine maleate; NSC 291562; NSC-291562; MD-67350; C22H31N3O5.C4H4…	XSTJTOKYCAJVMJ-GVTSEVKNSA-N	CHEMBL4303265		Others	Others	Calcium Channel; Others; Others	Calcium Channel					Calcium_Channel	Calcium Channel
M92241	J	5	50	10	DMSO	319-89-1	T0223	Tetroquinone	Tetrahydroxybenzoquinone; Tetrahydroxy-1,4-benzoquinone; Tetrahydroxyquinone; Tetrahydroxy-1; 4-benzoquinone	OC1=C(O)C(=O)C(O)=C(O)C1=O	C6H4O6	172.09	Apoptosis; Immunology/Inflammation; oxidation-reduction	Antioxidant; Apoptosis; ROS	Antioxidant; Reactive Oxygen Species; Apoptosis	Tetrahydroxyquinone is a molecule best known as a primitive anticataract drug, is also a highly redox active molecule that can take part in a redox cycle with semiquinone radicals, leading to the formation of reactive oxygen species (ROS).	Lou K, et al. J Am Chem Soc. 2010 Dec 15; 132(49):17635-41.	5424	Tetrahydroxyquinone; tetroquinone; 319-89-1; 2,3,5,6-tetrahydroxycyclohexa-2,5-diene-1,4-dione; Tetrahydroxy-1,4-benzoquinone; Kelox; Tetrahydroxy-p-benzoquinone; HPEK-1; Tetrahydroxy-p-quinone; Tetrahydroxy-1,4-quinone; Tetrahydroxyparabenzoquinone; Tetroquinona; Tetroquinonum; 2,5-Cyclohexadiene-1,4-dione, 2,3,5,6-tetrahydroxy-; Tetrochinone; 2,3,5,6-Tetrahydroxy-p-benzoquinone; NSC-112931; Tet…	DGQOCLATAPFASR-UHFFFAOYSA-N	CHEMBL1329029	TETROQUINONE	Others	Others	Antioxidant; Apoptosis; ROS; Others; Others						Antioxidant	Antioxidant
M92241	J	6	50	10	DMSO	99300-78-4	T0472	Venlafaxine hydrochloride	Wy 45030 hydrochloride; Venlafaxine HCl	Cl.COc1ccc(cc1)C(CN(C)C)C1(O)CCCCC1	C17H28CLNO2	313.86	GPCR/G Protein; Neuroscience	5-HT Receptor; Serotonin Transporter	5-HT; Serotonin Transporter	Venlafaxine hydrochloride is a cyclohexanol and phenylethylamine derivative that functions as a SEROTONIN AND NORADRENALINE REUPTAKE INHIBITOR (SNRI) and is used as an ANTIDEPRESSIVE AGENT.	Ball SE, et al. Br J Clin Pharmacol, 1997, 43(6), 619-626.	62923	Venlafaxine hydrochloride; 99300-78-4; Effexor; VENLAFAXINE HCl; Efexor; Effexor XR; Dobupal; Vandral; Venlafaxinehydrochloride; Wy-45030; Trevilor; Venlafaxine (hydrochloride); sila-venlafaxine; Wy 45030; Wy-45,030; Wy 45030 hydrochloride; 1-(2-(Dimethylamino)-1-(4-methoxyphenyl)ethyl)cyclohexanol hydrochloride; Venlafaxine hydrochloride [USAN]; 1-[2-(dimethylamino)-1-(4-methoxyphenyl)ethyl]cycl…	QYRYFNHXARDNFZ-UHFFFAOYSA-N	CHEMBL1201066	VENLAFAXINE HYDROCHLORIDE	Others	Others	5-HT Receptor; Serotonin Transporter; Others; Others	Serotonin Transporter	SERT	https://www.ncbi.nlm.nih.gov/pmc/articles/PMC6741467/	hsa04726	Transporter	Serotonin	5-HT Receptor
M92241	J	7	50	10	DMSO	96036-03-2	T0224	Meropenem	SM 7338	C[C@@H](O)[C@@H]1[C@H]2[C@@H](C)C(S[C@@H]3CN[C@@H](C3)C(=O)N(C)C)=C(N2C1=O)C(O)=O	C17H25N3O5S	383.46	Microbiology/virology	Antibacterial; Antibiotic	Bacterial; Antibiotic; Î²-Lactamase; D-alanyl-D-alanine carboxypeptidase DacB	Meropenem is a carbapenem antibiotic with broad spectrum of activity that is administered intravenously and used for severe bacterial infections due to sensitive agents. Meropenem is a common cause of mild transient aminotransferase elevations and can rarely result in clinically apparent, cholestatic liver injury.	Edwards JR, et al. J Antimicrob Chemother, 1995, 36 Suppl A, 1-17.	441130	meropenem; 96036-03-2; Merrem; Meropenem anhydrous; Meropenemum; Antibiotic SM 7338; MERONEM; Merrem I.V.; MEPM; 119478-56-7; Meropenem [INN]; CHEBI:43968; SM-7338; Meropenem, anhydrous; Meropen; UNII-YOP6PX0BAO; YOP6PX0BAO; Meropenemum [INN-Latin]; (4r,5s,6s)-3-{[(3s,5s)-5-(Dimethylcarbamoyl)pyrrolidin-3-Yl]sulfanyl}-6-[(1r)-1-Hydroxyethyl]-4-Methyl-7-Oxo-1-Azabicyclo[3.2.0]hept-2-Ene-2-Carboxyl…	DMJNNHOOLUXYBV-PQTSNVLCSA-N	CHEMBL127	MEROPENEM	Others	Others	Antibacterial; Antibiotic; Others; Others	Penicillin-binding proteins (PBPs)	PBPs	https://www.ncbi.nlm.nih.gov/pmc/articles/PMC2847397/	hsa00550	Enzyme	Penicillin_Binding	Antibacterial
M92241	J	8	50	10	DMSO	548-62-9	T1343L	Crystal Violet	Gentian Violet; Methyl Violet 10B; Basic Violet 3; Hexamethylpararosaniline chloride	[Cl-].CN(C)c1ccc(cc1)C(\c1ccc(cc1)N(C)C)=C1\C=C/C(/C=C\1)=[N+](/C)C	C25H30ClN3	407.98	DNA Damage/DNA Repair; Microbiology/virology	Antibacterial; DNA Alkylation; Influenza Virus	DNA; Influenza Virus; Bacterial	Crystal violet is a triarylmethane dye that is a mixture of violet rosanilinis, with antibacterial, antifungal, and anthelmintic properties.	Titford, M. Biotech. Histochem. 2007, 82 (4â€“5): 227â€“234.	11057	Crystal violet; gentian violet; 548-62-9; Basic violet 3; Methyl Violet 10B; Hexamethylpararosaniline chloride; Methylrosaniline chloride; Aniline Violet; methylrosanilinium chloride; Hexamethyl Violet; Gentiaverm; Pyoktanin; Adergon; Atmonil; Avermin; Axuris; Vianin; Viocid; Badil; Bismuth Violet; C.I. Basic violet 3; Basic Violet BN; Gentersal; Genticid; Gentioletten; Oxycolor; Vermicid; Genapa…	ZXJXZNDDNMQXFV-UHFFFAOYSA-M	CHEMBL64894	GENTIAN VIOLET	Others	Others	Antibacterial; DNA Alkylation; Influenza Virus; Others; Others	DNA		Bagdonas, S., et al. "Photodynamic inactivation of Gram-negative bacteria: problems and possible solutions." Journal of Photochemistry and Photobiology B: Biology 207 (2020): 111880.		DNA intercalating agent	DNA/RNA_Associated	Antibacterial
M92241	J	9	50	10	DMSO	11/7/1989	T0225	Pizotifen Malate	Pizotyline (malate); BC-105 (malate); BC-105	OC(CC(O)=O)C(O)=O.CN1CC\C(CC1)=C1/c2ccsc2CCc2ccccc12	C19H21NSÂ·C4H6O5	429.53	GPCR/G Protein; Neuroscience	5-HT Receptor	5-HT; 5-HT Receptor	Pizotifen malate, a highly selective 5-HT receptor blocking agent, is a drug based on benzocycloheptane.	Margarit MV, et al. Drug Dev Ind Pharm. 2001 Jul;27(6):517-22.	168993	Pizotifen malate; 5189-11-7; Pizotyline malate; Pizotifen (malate); Sanomtgran; Pizotifen hydrogen malate; Mosegor; Litec malate; Sandomigran malate; Sandomygran malate; PIZOTIFENMALATE; BC 105 malate; 99O99YVR4C; 4-(9,10-dihydro-4H-benzo[4,5]cyclohepta[1,2-b]thiophen-4-ylidene)-1-methylpiperidine 2-hydroxysuccinate; 5189-11-7 (malate); CHEBI:50213; Sanomigran; EINECS 225-970-4; NSC-758899; BC-10…	IWAWCPZVTXCFKD-UHFFFAOYSA-N	CHEMBL1592663		Others	Others	5-HT Receptor; Others; Others	5-HT receptor	5HTR	https://pubchem.ncbi.nlm.nih.gov/compound/Pizotifen#section=Pharmacology-and-Biochemistry	hsa04080	G protein-coupled receptor	5-HT	5-HT Receptor
M92241	J	10	50	10	DMSO	79559-97-0	T0482	Sertraline hydrochloride	Sertraline HCl; CP-51974-1 HCl	Cl.CN[C@H]1CC[C@@H](c2ccc(Cl)c(Cl)c2)c2ccccc12	C17H17Cl2NÂ·HCl	342.69	GPCR/G Protein; Neuroscience	5-HT Receptor; Serotonin Transporter	5-HT; Serotonin Transporter	Sertraline hydrochloride is a selective serotonin uptake inhibitor that is used in the treatment of depression.	Koe BK, et al. J Pharmacol Exp Ther, 1983, 226(3), 686-700.	63009	Sertraline hydrochloride; 79559-97-0; Sertraline HCl; Zoloft; Gladem; Serad; (1S,4S)-4-(3,4-dichlorophenyl)-N-methyl-1,2,3,4-tetrahydronaphthalen-1-amine hydrochloride; Atruline; Tresleen; Tatig; Lustral; Adjuvin; Sertraline.HCl; rac-cis-Sertraline Hydrochloride; Sertraline (hydrochloride); UNII-UTI8907Y6X; (+)-sertraline hydrochloride; Sertraline (as hydrochloride); NSC-746308; NSC-758948; CHEBI…	BLFQGGGGFNSJKA-XHXSRVRCSA-N	CHEMBL1709	SERTRALINE HYDROCHLORIDE	Others	Others	5-HT Receptor; Serotonin Transporter; Others; Others	Serotonin Transporter	SERT	https://pubmed.ncbi.nlm.nih.gov/9156033/	hsa04726	transporter	Serotonin	5-HT Receptor
M92241	J	11	50	10	DMSO	63659-19-8	T0226	Betaxolol hydrochloride	SL75212; Betaxolol HCl; SL 75212 HCl	Cl.CC(C)NCC(O)COc1ccc(CCOCC2CC2)cc1	C18H30ClNO3	343.89	GPCR/G Protein; Neuroscience	Adrenergic Receptor	Adrenergic Receptor; Î²1-adrenergic receptor	Betaxolol is a cardioselective beta-blocker used in the treatment of hypertension. Betaxolol has not been linked to instances of clinically apparent drug induced liver injury.	Tang LQ, et al. Curr Eye Res, 1998, 17(1), 24-30.	107952	Betaxolol hydrochloride; 63659-19-8; Betaxolol HCL; Betoptic; Kerlone; Betoptima; Lokren; Betaxolol (hydrochloride); Kerlon; Betoptic S; alo 1401-02; Betaxolol hydrochloride [USAN]; Betaxolol hydrochloride (Betoptic); EINECS 264-384-3; NSC-760048; SL75212; UNII-6X97D2XT0O; MLS000863279; 6X97D2XT0O; SL 75 212-10; ALO-140102; Betaxolol hydrochloride [USAN:USP:JAN]; SMR000058420; Betoptic (TN); Kerl…	CHDPSNLJFOQTRK-UHFFFAOYSA-N	CHEMBL1691	BETAXOLOL HYDROCHLORIDE	Others	Others	Adrenergic Receptor; Others; Others	Beta-1 adrenergic receptor	ADRB1	https://pubchem.ncbi.nlm.nih.gov/compound/Betaxolol#section=Pharmacology-and-Biochemistry	hsa04080	G protein-coupled receptor	Adrenergic_Receptor	Adrenergic Receptor
M92241	J	12	50	10	DMSO	959-24-0	T0483	Sotalol hydrochloride	MJ-1999; Sotalol HCl; Betapace; Betapace AF	Cl.CC(C)NCC(O)c1ccc(NS(=O)(=O)C)cc1	C12H21ClN2O3S	308.82	GPCR/G Protein; Membrane transporter/Ion channel; Neuroscience	Adrenergic Receptor; Potassium Channel	Adrenergic Receptor; Î²-adrenergic receptor; Potassium Channel	Sotalol Hydrochloride is the hydrochloride salt form of sotalol, an ethanolamine derivative with Class III antiarrhythmic and antihypertensive properties.	Lowe MD, et al. Br J Pharmacol. 2002 Jan;135(2):451-61.	66245	Sotalol hydrochloride; 959-24-0; Sotalol HCL; Betapace; Betapace AF; Sotalex; Sotacor; Sorine; Sotalol (hydrochloride); MJ 1999; Sotylize; Berlex; Mead johnson 1999; Sotalol.HCl; (+/-)-Sotalol hydrochloride; Darob; Sotalol, HCl; Betapace (TN); Sotalol hydrochloride [USAN]; Sotalol (Betapace); 4'-(1-Hydroxy-2-(isopropylamino)ethyl)methanesulfonanilide monohydrochloride; Isopropylaminohydroxyethylm…	VIDRYROWYFWGSY-UHFFFAOYSA-N	CHEMBL1700	SOTALOL HYDROCHLORIDE	Others	Others	Adrenergic Receptor; Potassium Channel; Others; Others	Î²-adrenergic receptor	ADRB	https://www.ncbi.nlm.nih.gov/pmc/articles/PMC1615839/	hsa04020	G protein-coupled receptor	Adrenergic_Receptor	Adrenergic Receptor
M92241	J	13	50	10	DMSO	496-67-3	T0227	Bromisoval	Bromovalerylurea; Isobromyl; Bromaral; BRN 1773255; 2-Bromo-N-carbamoyl-3-methylbutanamide	CC(C)C(Br)C(=O)NC(=O)N	C6H11BrN2O2	223.07	Others	Others	Others	Bromisoval is a mild hypnotic and sedative with potential toxicity.	Kumazawa T, et al. J Anal Toxicol. 1992 May-Jun;16(3):163-5.	2447	Bromisoval; 496-67-3; bromovalerylurea; bromisovalum; Bromvalerylurea; 2-bromo-N-carbamoyl-3-methylbutanamide; Bromural; Bromaral; Bromvaletone; Brovarin; Calmotin; Dagrabromyl; Dibroluur; Dormigene; Uvaleral; Upiol; Bromcarbamide; Bromizoval; Bromocarbamide; Isobromyl; Alural; 1-(2-Bromoisovaleryl)urea; Bromisovalerylurea; Bromovalerocarbamide; 2-Bromo-3-methylbutyrylurea; Bromvaletonum; Bromova…	CMCCHHWTTBEZNM-UHFFFAOYSA-N	CHEMBL1515611	BROMISOVALUM	Others	Others	Others; Others; Others						Others	Others
M92241	J	14	50	10	DMSO	169590-41-4	T0484	Deracoxib	SC 46; SC 59046; SC 046	COc1c(F)cc(cc1)c1cc(nn1c1ccc(cc1)S(=O)(=O)N)C(F)F	C17H14F3N3O3S	397.37	Apoptosis; Immunology/Inflammation; Neuroscience	Apoptosis; COX	COX-2; COX; Apoptosis	Deracoxib is a non-steroidal, non-narcotic anti-inflammatory drug. It is also a selective cyclooxygenase-2 inhibitor, and IC50 Value: 70 to 150 Î¼M(inhibition of 3 osteosarcoma cell lines).	UstÃ¼n Alkan F, et al. ScientificWorldJournal. 2012;2012:976740.	3058754	Deracoxib; 169590-41-4; Deramaxx; 4-(3-(difluoromethyl)-5-(3-fluoro-4-methoxyphenyl)-1H-pyrazol-1-yl)benzenesulfonamide; SC 46; SC 046; SC 59046; C17H14F3N3O3S; SC-59046; Deracoxib [USAN]; Deracoxib [USAN:INN]; 4-[3-(difluoromethyl)-5-(3-fluoro-4-methoxyphenyl)-1H-pyrazol-1-yl]benzenesulfonamide; UNII-VX29JB5XWV; VX29JB5XWV; NSC-758935; CHEMBL28636; DTXSID4045975; CHEBI:73032; Deracoxib (USAN); 4…	WAZQAZKAZLXFMK-UHFFFAOYSA-N	CHEMBL28636	DERACOXIB	Others	Others	Apoptosis; COX; Others; Others	Cyclooxygenase-2	COX-2	https://pubchem.ncbi.nlm.nih.gov/compound/Deracoxib#section=Pharmacology-and-Biochemistry	hsa00590	Enzyme	COX	Apoptosis
M92241	J	15	50	10	DMSO	11013-97-1	T0228	Methyl hesperidin		COc1ccc(cc1OC)[C@@H]1CC(=O)c2c(O)cc(O[C@@H]3O[C@H](CO[C@@H]4O[C@@H](C)[C@H](O)[C@@H](O)[C@H]4O)[C@@H](O)[C@H](O)[C@H]3O)cc2O1	C29H36O15	624.59	Chromatin/Epigenetic; Cytoskeletal Signaling; PI3K/Akt/mTOR signaling	Akt; PKC	Akt; PKC	Methyl Hesperidin, a flavanone glycoside (flavonoid) (C28H34O15), is abundant in citrus fruits. Its aglycone form is called hesperetin.	Nizamutdinova IT, et al. Int Immunopharmacol, 2008, 8(5), 670-678.	5284419	Methyl hesperidin; Methylhesperidin; 11013-97-1; (2S)-2-(3,4-dimethoxyphenyl)-5-hydroxy-7-[(2S,3R,4S,5S,6R)-3,4,5-trihydroxy-6-[[(2R,3R,4R,5R,6S)-3,4,5-trihydroxy-6-methyloxan-2-yl]oxymethyl]oxan-2-yl]oxy-2,3-dihydrochromen-4-one; DTXSID7020841; UNII-K324U7386B; CHEBI:81056; K324U7386B; DTXCID90841; CCRIS 4278; (S)-2-(3,4-Dimethoxyphenyl)-5-hydroxy-7-(((2S,3R,4S,5S,6R)-3,4,5-trihydroxy-6-((((2R,3…	GUMSHIGGVOJLBP-SLRPQMTOSA-N	CHEMBL3184988		Others	Others	Akt; PKC; Others; Others	Akt and PKC	Akt/PKC		hsa04012 (for Akt), hsa04014 (for PKC)	Kinase	AKT	Akt
M92241	J	16	50	10	DMSO	136572-09-3	T0486	Irinotecan hydrochloride trihydrate	Irinotecan HCl Trihydrate; CPT-11 HCl Trihydrate	O.O.O.Cl.CCc1c2Cn3c(cc4c(COC(=O)[C@]4(O)CC)c3=O)-c2nc2ccc(OC(=O)N3CCC(CC3)N3CCCCC3)cc12	C33H45ClN4O9	677.18	Autophagy; DNA Damage/DNA Repair	Autophagy; Topoisomerase	Topo I; Topoisomerase; Autophagy	Irinotecan HCl-trihydrate keeps DNA from unwinding by inhibiting topoisomerase 1.	Pavillard V, et al. Cancer Chemother Pharmacol. 2002, 49(4), 329-335.	60837	IRINOTECAN HYDROCHLORIDE Trihydrate; 136572-09-3; Camptosar; Irinotecan Hcl Trihydrate; Campto; Onivyde; CPT-11; Irinotecan hydrochloride hydrate; CPT-11 Trihydrate; IRINOTECAN MONOHYDROCHLORIDE TRIHYDRATE; U-101,440E; Irinotecan (hydrochloride trihydrate); UNII-042LAQ1IIS; 042LAQ1IIS; 136572-09-3 (HCl trihydrate); NSC-759878; (+)-7-Ethyl-10-hydroxycamptothecine 10-(1,4'-bipiperidine)-1'-carboxyl…	KLEAIHJJLUAXIQ-JDRGBKBRSA-N	CHEMBL3989514	IRINOTECAN HYDROCHLORIDE	Others	Others	Autophagy; Topoisomerase; Others; Others	Topoisomerase I	TOP1	Pommier Y. "Topoisomerase I inhibitors: camptothecins and beyond." Nature Reviews Cancer 6, no. 10 (2006): 789-802.	hsa03030	enzyme	Topoisomerase	Autophagy
M92241	J	17	50	10	DMSO	123441-03-2	T0229	Rivastigmine	S-Rivastigmine; SDZ-ENA 713; Exelon	C(=O)(N(C)CC)Oc1cc(ccc1)[C@H](C)N(C)C	C14H22N2O2	250.34	Neuroscience	AChR	AChE	Rivastigmine is a Cholinesterase Inhibitor, used for therapy of Alzheimer disease.	Jann MW, et al. Pharmacotherapy. 2000, 20(1):1-12.	77991	rivastigmine; 123441-03-2; Exelon; ENA 713 free base; Prometax; Rivastigmine Teva; Nimvastid; S-Rivastigmine; Exelon Patch; rivastigmine hexal; (S)-3-(1-(dimethylamino)ethyl)phenyl ethyl(methyl)carbamate; 3-[(1S)-1-(dimethylamino)ethyl]phenyl N-ethyl-N-methylcarbamate; Rivastigmine sandoz; SDZ-ENA-713; SDZ-212-713; m-((S)-1-(Dimethylamino)ethyl)phenyl ethylmethylcarbamate; (S)-3-(1-(Dimethylamino…	XSVMFMHYUFZWBK-NSHDSACASA-N	CHEMBL636	RIVASTIGMINE	Others	Others	AChR; Others; Others	Acetylcholinesterase and Butyrylcholinesterase	AChE, BChE	https://pubmed.ncbi.nlm.nih.gov/9195198/	hsa00564	enzyme	AChE	AChR
M92241	J	18	50	10	DMSO	56392-17-7	T0487	Metoprolol tartrate	CGP 2175E	O[C@H]([C@@H](O)C(O)=O)C(O)=O.COCCc1ccc(OCC(O)CNC(C)C)cc1.COCCc1ccc(OCC(O)CNC(C)C)cc1	C15H25NO3.2:1C4H6O6	684.81	GPCR/G Protein; Neuroscience	Adrenergic Receptor	Adrenergic Receptor; Î²-adrenergic receptor	Metoprolol Tartrate is a blocker of the cardioselective Î²-adrenergic receptor.	Sabbah HN, et al. J Am Coll Cardiol,2000, 36(5), 1698-1705.	441308	Metoprolol tartrate; Beloc; Selopral; Prelis; 56392-17-7; Metoproferm; Selectadril; Arbralene; Azumetop; Beprolo; Bloksan; Cardoxone; Jeprolol; Kapodine; Mepolol; Metoberag; Metoberta; Metocard; Metolol; Metomerck; Metoprolin; Prolaken; Ritmolol; Selokeen; Sigaprolol; Topromel; Vasocardin; Bloxan; Lanoc; Metop; Metoprolol acis; Minax; Metoprolol-rpm; Metoprolol Atid; Metoprolol hemitartrate; Meto…	YGULWPYYGQCFMP-CEAXSRTFSA-N	CHEMBL3186768		Others	Others	Adrenergic Receptor; Others; Others	Beta-1 adrenergic receptor	ADRB1	https://www.ncbi.nlm.nih.gov/pmc/articles/PMC1615839/	hsa04020	G protein-coupled receptor	Adrenergic_Receptor	Adrenergic Receptor
M92241	J	19	50	10	DMSO	150322-43-3	T0230	Prasugrel	PCR 4099; CS-747; LY640315	CC(=O)Oc1cc2c(CCN(C2)C(C(=O)C2CC2)c2ccccc2F)s1	C20H20FNO3S	373.44	Neuroscience	P2 Receptor	P2Y Receptor; P2Y; P2Y12	Prasugrel is a piperazine derivative and PLATELET AGGREGATION INHIBITOR that is used to prevent THROMBOSIS in patients with ACUTE CORONARY SYNDROME; UNSTABLE ANGINA and MYOCARDIAL INFARCTION, as well as in those undergoing PERCUTANEOUS CORONARY INTERVENTIONS.	Hashimoto M, et al. Biochem Pharmacol, 2007, 74(7), 1003-1009.	6918456	Prasugrel; 150322-43-3; Effient; Efient; CS-747; Prasugrel (Effient); 5-(2-cyclopropyl-1-(2-fluorophenyl)-2-oxoethyl)-4,5,6,7-tetrahydrothieno[3,2-c]pyridin-2-yl acetate; LY-640315; LY640315; C20H20FNO3S; CS 747; Prasugrel [INN]; Pcr 4099; UNII-34K66TBT99; CHEBI:87723; Prasugrel [INN:BAN]; NSC-759625; 5-[2-cyclopropyl-1-(2-fluorophenyl)-2-oxoethyl]-4H,5H,6H,7H-thieno[3,2-c]pyridin-2-yl acetate; 5…	DTGLZDAWLRGWQN-UHFFFAOYSA-N	CHEMBL1201772	PRASUGREL	Others	Others	P2 Receptor; Others; Others	P2Y12 receptor	P2Y12	Wallentin L, Becker RC, Budaj A, et al. "Ticagrelor versus clopidogrel in patients with acute coronary syndromes." The New England Journal of Medicine 2009; 361:1045-57.	hsa04080	G protein-coupled receptor	P2_Receptor	P2 Receptor
M92241	J	20	50	10	DMSO	26921-17-5	T0475	Timolol Maleate	MK 950; (S)-Timolol Maleate; L-714,465 (Maleate)	C([C@@H](COc1nsnc1N1CCOCC1)O)NC(C)(C)C.C(=O)(/C=C\C(=O)O)O	C17H28N4O7S	432.5	GPCR/G Protein; Neuroscience	Adrenergic Receptor	Adrenergic Receptor; Î²1-adrenergic receptor; Î²2-adrenergic receptor	Timolol is a nonselective beta-adrenergic receptor blocker that is widely used for the therapy of hypertension, angina pectoris and prevention of vascular headaches.	Hall RA, et al. Arch Int Pharmacodyn Ther, 1975, 213(2), 251-263.	5281056	Timolol maleate; 26921-17-5; (S)-Timolol maleate; Timolol maleate salt; Timoptic; Blocadren; Timolol hydrogen maleate; Timacor; Betime; Timoptic-XE; l-Timolol maleate; (S)-Timolol (Maleate); Timoptic in Ocudose; (S)-Timolol hydrogen maleate; Ophtamolol; Aquanil; MK 950; CCRIS 1057; Timolol (as maleate); C13H24N4O3S.C4H4O4; EINECS 248-111-5; Timolol hydrogen maleate salt; Timolol maleate, s-enanti…	WLRMANUAADYWEA-NWASOUNVSA-N	CHEMBL1200870	TIMOLOL MALEATE	Others	Others	Adrenergic Receptor; Others; Others	Beta-adrenergic receptor	ADRB	"Drugs.com. Timolol."	hsa04020	G protein-coupled receptor (GPCR)	Adrenergic_Receptor	Adrenergic Receptor
M92241	J	21	50	10	DMSO	6/9/1975	T0222	Proparacaine hydrochloride	Proxymetacaine Hydrochloride; Proparacaine HCl	Cl.CCCOc1ccc(cc1N)C(=O)OCCN(CC)CC	C16H26N2O3Â·HCl	330.86	Apoptosis; Membrane transporter/Ion channel	Apoptosis; sodium channel	Apoptosis; Voltage-gated sodium channel	Proparacaine Hydrochloride is the hydrochloride salt form of proparacaine, a benzoic acid derivative with local anesthetic property. Proparacaine hydrochloride stabilizes the neuronal membrane by binding to and inhibiting voltage-gated sodium channels, thereby inhibiting sodium ion influx required for the initiation and conduction of impulses within the neuronal cell, and resulting in a loss of s…	Grant RL, et al. Exp Eye Res, 1994, 58(4), 469-478.	517321	Proparacaine hydrochloride; 5875-06-9; Proparacaine Hcl; Proxymetacaine hydrochloride; Alcaine; 2-(Diethylamino)ethyl 3-Amino-4-propoxybenzoate Hydrochloride; Ak-taine; Proparacaine, HCl; Proparacaine (Hydrochloride); Kainair; Ophthain; Ophthetic; Paracaine; NSC-759896; U96OL57GOY; DTXSID0049022; 2-(diethylamino)ethyl 3-amino-4-propoxybenzoate;hydrochloride; Keracaine; Chibro-Heracaine; Alcaine (…	BFUUJUGQJUTPAF-UHFFFAOYSA-N	CHEMBL1200464	PROPARACAINE HYDROCHLORIDE	Others	Others	Apoptosis; sodium channel; Others; Others	sodium channel	NaV	https://www.ncbi.nlm.nih.gov/pmc/articles/PMC6474222/	hsa04080	Ion channel	Sodium_Channel	Apoptosis
M92241	J	22	50	10	DMSO	13311-84-7	T0489	Flutamide	SCH 13521	CC(C)C(=O)Nc1cc(c(cc1)[N+](=O)[O-])C(F)(F)F	C11H11F3N2O3	276.21	Endocrinology/Hormones	Androgen Receptor	Androgen Receptor	Flutamide is an antiandrogen with about the same potency as cyproterone in rodent and canine species.	Simard J, et al. Mol Cell Endocrinol, 1986, 44(3), 261-270.	3397	flutamide; 13311-84-7; Eulexin; Niftolide; Niftholide; Sch 13521; NFBA; niftolid; 2-Methyl-N-[4-nitro-3-(trifluoromethyl)phenyl]propanamide; Drogenil; Flutamin; Cebatrol, veterinary; Flutamida; Flutamidum; Sch-13521; 4'-Nitro-3'-trifluoromethylisobutyranilide; Eulexine; Chimax; Ham's F-12 medium; Flutamidum [INN-Latin]; 2-Methyl-N-(4-nitro-3-[trifluoromethyl]phenyl)propanamide; N-(4-NITRO-3-(TRIF…	MKXKFYHWDHIYRV-UHFFFAOYSA-N	CHEMBL806	FLUTAMIDE	Others	Others	Androgen Receptor; Others; Others	Androgen Receptor	AR	https://pubchem.ncbi.nlm.nih.gov/compound/Flutamide#section=Mechanism-of-Action	hsa05200	Receptor	Androgen_Receptor	Androgen Receptor
M92241	K	3	50	10	DMSO	79-55-0	T0296	Pempidine	1,2,2,6,6-Pentamethylpiperidine; Pyrilene; Perolysen	CN1C(C)(C)CCCC1(C)C	C10H21N	155.28	Neuroscience	AChR	Nicotinic Receptor; ganglion	Pempidine is a nicotinic antagonist, has been used as a ganglionic blocker in the treatment of hypertension.	A. Spinks et al. Br. J. Pharmacol. ChemOthers. 1958, 13: 501-520.	6603	Pempidine; 1,2,2,6,6-Pentamethylpiperidine; 79-55-0; Pyrilene; Perolysen; Tenormal; PIPERIDINE, 1,2,2,6,6-PENTAMETHYL-; Pempidina [DCIT]; Pempidinum; Pempidina; Pempidine [INN:BAN]; Pempidinum [INN-Latin]; M+B 4486; 1,2,2,6,6-Pentamethyl-piperidine; EINECS 201-211-2; UNII-N5I18JI9D6; N5I18JI9D6; pempidine tosilate; pempidine tosylate; MFCD00006493; NSC-758448; N-Methyl-2,2,6,6-Tetramethylpiperidi…	XULIXFLCVXWHRF-UHFFFAOYSA-N	CHEMBL1617409	PEMPIDINE	Others	Others	AChR; Others; Others	Acetylcholine receptor	AChR	Graef JD, Ritzmann RF, Lunt GG. "Pempidine: a ligand with high affinity for the open configuration of the ion channel in the nicotinic acetylcholine receptor." Molecular Pharmacology, 1985; 27(3): 255-261.	hsa04080	Ion channel	AChR	AChR
M92241	K	4	50	10	DMSO	89778-26-7	T0139	Toremifene	Z-Toremifene; GTx 006	CN(C)CCOc1ccc(cc1)/C(=C(/CCCl)\c1ccccc1)/c1ccccc1	C26H28ClNO	405.96	Endocrinology/Hormones	Estrogen Receptor/ERR; Estrogen/progestogen Receptor	ER; Estrogen Receptor/ERR	Toremifene is a selective estrogen-receptor modulator (SERM).	Locci P, et al. J Interferon Cytokine Res. 2001 Nov;21(11):961-70.	3005573	toremifene; 89778-26-7; Acapodene; Farestone; Z-Toremifene; Toremifeno; Toremifenum; Toremifenum [Latin]; Toremifeno [Spanish]; Chlortamoxifen; FC-1157a; Toremifene Base; GTx 006; Toremifene [INN:BAN]; (E)-Toremifene; GTx-006; Toremiphene; Estrimex; Toremifene Citrate (1:1); Fareston (TN); Toremifene (INN); GTX-006 (Acapodene); UNII-7NFE54O27T; FC1157a; 7NFE54O27T; CCRIS 8745; CHEBI:9635; 89778-2…	XFCLJVABOIYOMF-QPLCGJKRSA-N	CHEMBL1655	TOREMIFENE	Others	Others	Estrogen Receptor/ERR; Estrogen/progestogen Receptor; Others; Others	Estrogen Receptor	ER	https://www.ncbi.nlm.nih.gov/pmc/articles/PMC2014833/	hsa04915	Receptor	Estrogen_Receptor	Estrogen Receptor/ERR
M92241	K	5	50	10	DMSO	83-86-3	T2971	Phytic acid	Inositol hexaphosphate; myo-Inositol, hexakis(dihydrogen phosphate); inositol polyphosphate; inositol hexakisphosphate; Fytic Acid	OP(O)(=O)O[C@H]1[C@H](OP(O)(O)=O)[C@@H](OP(O)(O)=O)[C@H](OP(O)(O)=O)[C@H](OP(O)(O)=O)[C@@H]1OP(O)(O)=O	C6H18O24P6	660.04	Metabolism	Endogenous Metabolite; Xanthine Oxidase	Endogenous Metabolite; Xanthine Oxidase	Fytic acid is a complexing agent for removal of traces of heavy metal ions. It acts also as a hypocalcemic agent.	Zhou JR, et al. Phytic acid in health and disease. Crit Rev Food Sci Nutr. 1995 Nov;35(6):495-508.	890	Phytic acid; 83-86-3; Fytic acid; Phytate; Inositol hexaphosphate; Alkalovert; myo-inositol hexakisphosphate; myo-Inositol hexaphosphate; Alkovert; Phytine; Acide fytique; Acidum fyticum; Acido fitico; inositol hexakisphosphate; myo-Inositol, hexakis(dihydrogen phosphate); Exfoderm; myo-Inosistol hexakisphosphate; (2,3,4,5,6-pentaphosphonooxycyclohexyl) dihydrogen phosphate; CCRIS 4513; Phyliance…	IMQLKJBTEOYOSI-UHFFFAOYSA-N	CHEMBL2005481	PHYTATE	Others	Others	Endogenous Metabolite; Xanthine Oxidase; Others; Others	Xanthine Oxidase	XO	https://www.ncbi.nlm.nih.gov/pmc/articles/PMC5028815/	hsa00230	Enzyme	Xanthine_Oxidase	Endogenous Metabolite
M92241	K	6	50	10	DMSO	1983-07-08	T0050	4-Aminoantipyrine	Ampyrone; NSC 60242; Solnapyrin-A; Minoazophene; Aminoantipyrin	Cn1n(c(=O)c(N)c1C)c1ccccc1	C11H13N3O	203.24	Immunology/Inflammation; Metabolism; Neuroscience	COX; Endogenous Metabolite	COX; Drug Metabolite	4-Aminoantipyrine is a reagent for glucose determination in the presence of peroxidase and phenol.	Vinagre AM, et al. Braz J Med Biol Res. 2016, 49(3).	2151	4-Aminoantipyrine; AMPYRONE; 83-07-8; 4-Aminophenazone; Metapirazone; Aminoantipyrine; 4-Aminoantipyrene; Aminoantipyrin; Solvapyrin-A; Aminoazophene; Solnapyrin-A; Aminoazophenazone; 4-AAP; 4-Amino-2,3-dimethyl-1-phenyl-3-pyrazolin-5-one; 3H-Pyrazol-3-one, 4-amino-1,2-dihydro-1,5-dimethyl-2-phenyl-; Antipyrine, 4-amino-; NSC 60242; 4-Amminoantipirina; 4-Amminoantipirina [Italian]; 4-Amino-1,5-di…	RLFWWDJHLFCNIJ-UHFFFAOYSA-N	CHEMBL1165011	AMPYRONE	Others	Others	COX; Endogenous Metabolite; Others; Others	Cyclooxygenase	COX	https://www.ncbi.nlm.nih.gov/pmc/articles/PMC1855331/	hsa00590 (Arachidonic acid metabolism)	Enzyme	COX	COX
M92241	K	7	50	10	DMSO	84-80-0	T1075	Vitamin K1	Phytomenadione; Phylloquinone; Phyllohydroquinone; Phytonadione	C1(=O)C(=C(C(=O)c2c1cccc2)C)C/C=C(/CCC[C@@H](CCC[C@@H](CCCC(C)C)C)C)\C	C31H46O2	450.71	Metabolism	Endogenous Metabolite	Endogenous Metabolite; GGCX; Osteocalcin	Vitamin K1 a fat-soluble, naturally occurring vitamin with antihemorrhagic and prothrombogenic activity.	Basset GJ, et al. Phylloquinone (Vitamin K1): Occurrence, Biosynthesis and Functions. Mini Rev Med Chem. 2016 Jun 22.	5284607	Phylloquinone; Vitamin K1; phytonadione; 84-80-0; Phytomenadione; Phytylmenadione; 3-Phytylmenadione; Aquamephyton; Konakion; Phyllochinon; Mephyton; Monodion; Synthex P; 2-Methyl-3-phytyl-1,4-naphthoquinone; alpha-Phylloquinone; Fitomenadiona; Phyllochinonum; Phytomenadionum; Phytonadionum; trans-Phylloquinone; VitaminK1; Antihemorrhagic vitamin; Fitomenadione; Vitamin K 1; Kinadion; Kephton; 79…	MBWXNTAXLNYFJB-NKFFZRIASA-N	CHEMBL1550	PHYTONADIONE	Others	Others	Endogenous Metabolite; Others; Others	Gamma-glutamyl carboxylase	GGCX	Rost S, Fregin A, Ivaskevicius V, Conzelmann E, HÃ¶rtnagel K, Pelz HJ, Lappegard K, Seifried E, Scharrer I, Tuddenham EG, MÃ¼ller CR, Strom TM, Oldenburg J. "Mutations in VKORC1 cause warfarin resistance and multiple coagulation factor deficiency type 2." Nature. 2004 Feb 5;427(6974):537-41.	map00120	Enzyme	Gamma-glutamyl_carboxylase	Endogenous Metabolite
M92241	K	8	50	10	DMSO	51-79-6	T0051	Urethane	Ethyl carbamate; Ethylurethane; Carbamic acid ethyl ester	CCOC(=O)N	C3H7NO2	89.09	Membrane transporter/Ion channel; Microbiology/virology; Neuroscience	AChR; Antibacterial; Chloride channel; GABA Receptor; GluR; NMDAR; Parasite	Bacterial; Parasite; Î±4Î²2 nAChR; glycine receptors; GABAR; AMPA; NMDA receptor	Urethane was an antineoplastic agent .Now is used for other medicinal purposes.	Barth AM, et al. J Neurosci. 31(3):851-860.	5641	urethane; ETHYL CARBAMATE; 51-79-6; Urethan; Carbamic acid, ethyl ester; Ethylurethane; Carbamic acid ethyl ester; Pracarbamine; Leucethane; Ethylcarbamate; Ethyl urethane; O-Ethylurethane; Pracarbamin; Ethyl urethan; U-Compound; Aethylcarbamat; Aethylurethan; Ethylurethan; Leucothane; Estane 5703; Uretan; Uretano [DCIT]; Uretan etylowy; ethyl aminoformate; NSC 746; Aethylurethan [German]; C3H7NO…	JOYRKODLDBILNP-UHFFFAOYSA-N	CHEMBL462547	URETHANE	Others	Others	AChR; Antibacterial; Chloride channel; GABA Receptor; GluR; NMDAR; Parasite; Others; Others						AChR	AChR
M92241	K	9	50	10	DMSO	1990-05-01	T1301	Guaiacol	2-Methoxyphenol; o-methoxyphenol; 2-hydroxyanisole; O-methylcatechol	COc1ccccc1O	C7H8O2	124.14	Immunology/Inflammation; Metabolism; Neuroscience; NF-ÎºB	COX; Endogenous Metabolite; NF-ÎºB	COX; NF-ÎºB; Endogenous Metabolite	Guaiacol is a precursor to various flavorants, such as eugenol and vanillin. Its derivatives are used medicinally as an expectorant, antiseptic, and local anesthetic. It also can be used as an indicator in chemical reactions that produce oxygen. When oxygen binds to it, the complex turns yellowish brown and absorbs light maximally at about 470 nm.	Dorfner R, et al. J Agric Food Chem. 2003 Sep 10;51(19):5768-73.	460	guaiacol; 2-Methoxyphenol; 90-05-1; o-Methoxyphenol; 2-Hydroxyanisole; Guaiastil; Pyroguaiac acid; o-Guaiacol; o-Hydroxyanisole; Pyrocatechol monomethyl ether; Phenol, 2-methoxy-; 1-Hydroxy-2-methoxybenzene; Anastil; Guaicol; Phenol, o-methoxy-; Methylcatechol; Guaicolina; Guajol; Guasol; O-Methyl catechol; Catechol monomethyl ether; Creodon; Guajakol; 8021-39-4; 2-Methoxy-Phenol; Methoxyphenol; …	LHGVFZTZFXWLCP-UHFFFAOYSA-N	CHEMBL13766	GUAIACOL	Others	Others	COX; Endogenous Metabolite; NF-ÎºB; Others; Others	COX	COX	PubChem Compound Summary for CID 460, Guaiacol. Retrieved September 30, 2023, from https://pubchem.ncbi.nlm.nih.gov/compound/Guaiacol		Enzyme	COX	COX
M92241	K	10	50	10	DMSO	10246-75-0	T0053	Hydroxyzine Pamoate	Hydroxyzine embonate; Bobsule; Equipose	OCCOCCN1CCN(CC1)C(c1ccccc1)c1ccc(Cl)cc1.OC(=O)c1cc2ccccc2c(Cc2c(O)c(cc3ccccc23)C(=O)O)c1O	C44H43ClN2O8	763.27	GPCR/G Protein; Immunology/Inflammation; Neuroscience	Histamine Receptor	H1 receptor; Histamine Receptor	Hydroxyzine pamoate is a histamine H1 receptor antagonist that is effective in the treatment of chronic urticaria, dermatitis, and histamine-mediated pruritus. Unlike its major metabolite CETIRIZINE, it does cause drowsiness. It is also effective as an antiemetic, for relief of anxiety and tension, and as a sedative.	Spahr L, et al. Am J Gastroenterol. 2007 Apr;102(4):744-53.	25096	Hydroxyzine pamoate; 10246-75-0; Hydroxyzine embonate; Hydroxyzine (pamoate); Bobsule; Equipose; Vistaril Pamoate; Hydroxyzine pamoate salt; Masmoran; Paxisitil; Atarax P; Hydroxyzyne pamoate; Hy-Pam; EINECS 233-582-1; NSC-757063; UNII-M20215MUFR; MLS000028605; M20215MUFR; Hydroxyzine pamoate [USP:JAN]; Hydroxyzine pamoate [USAN:JAN]; C23H16O6.C21H27ClN2O2; SMR000058728; 2-(2-(4-(p-Chloro-alpha-p…	ASDOKGIIKXGMNB-UHFFFAOYSA-N	CHEMBL1200467	HYDROXYZINE PAMOATE	Others	Others	Histamine Receptor; Others; Others	Histamine H1 receptor	HRH1	https://pubchem.ncbi.nlm.nih.gov/compound/Hydroxyzine#section=Mechanism-of-Action	hsa04080	G protein-coupled receptor	Histamine_Receptor	Histamine Receptor
M92241	K	11	50	10	DMSO	132-60-5	T0456	Cinchophen	Cinconal	OC(=O)c1cc(nc2ccccc12)c1ccccc1	C16H11NO2	249.26	Immunology/Inflammation; Neuroscience	COX	COX	Cinchophen, an analgesic drug, is utilized in treating gout.	CutrÃ­n Prieto C, et al. Med Clin (Barc), 1991, 97(3), 104-106	8593	Cinchophen; 132-60-5; 2-Phenylquinoline-4-carboxylic acid; 2-Phenyl-4-quinolinecarboxylic acid; Cinchopen; 2-Phenylcinchoninic acid; Cinconal; Atophan; Cinchophene; Phenoquin; Quinofen; Quinophan; Quinophen; Tervalon; Atofan; Cinchophenic acid; Aciphenochinolinium; Aminophan; Artexin; Cincosal; Ikterosan; Mylofanol; Phenophan; Rhematan; Rheumin; Tophosan; Traubofan; Viophan; Agotan; Alutyl; Artam…	YTRMTPPVNRALON-UHFFFAOYSA-N	CHEMBL348000	CINCHOPHEN	Others	Others	COX; Others; Others	COX (Cyclooxygenase)	COX	Rainsford KD. "History of the therapeutic use of NSAIDs and anti-arthritic drugs for the treatment of inflammation and pain in the 20th century." Inflammopharmacology. 2021 Apr;29(2):349-374	hsa00590 (Arachidonic acid metabolism)	Enzyme	COX	COX
M92241	K	12	50	10	DMSO	3820-67-5	T0055	Glafenine	Glafenin	OCC(O)COC(=O)C1=CC=CC=C1NC1=C2C=CC(Cl)=CC2=NC=C1	C19H17ClN2O4	372.8	Immunology/Inflammation; Neuroscience	COX	COX	Glafenine, a non-narcotic analgesic agent, is a non-steroidal anti-inflammatory drug (NSAID), and widely used for the therapy of pains of various origins.	Kleinknecht D, et al. Clin Nephrol. 1986 Jun;25(6):275-81.	3474	glafenine; 3820-67-5; Glafenin; Glaphenine; Glycerylaminophenaquine; Glaphenin; Glicafan; Glifanan; Glifan; Dolomate; Glafenina; Glifanar; Privadol; 2,3-Dihydroxypropyl 2-((7-chloroquinolin-4-yl)amino)benzoate; Glafeninum; Alicidon; Adalgur [French]; 2,3-Dihydroxypropyl N-(7-chloro-4-quinolyl) anthranilate; Adalgur; Alcidon; R 1707; CHEBI:31653; Glafeninum [INN-Latin]; Glafenina [INN-Spanish]; Gl…	GWOFUCIGLDBNKM-UHFFFAOYSA-N	CHEMBL146095	GLAFENINE	Others	Others	COX; Others; Others	Cyclooxygenase (COX)	COX	Patel S, Sprung AU, Keller JN, He Y, Gonzales C, Johnstone AFM, Lee EY, Lee MYWT. "Cyclooxygenase- and cytochrome P450-derived eicosanoids mediate the cognitive effects of systemic inflammation: Implications of NSAID efficacy in Alzheimerâ€™s disease." Frontiers in Pharmacology. 2018;9:838. https://doi.org/10.3389/fphar.2018.00838	map00590 (Arachidonic acid metabolism)	Enzyme	COX	COX
M92241	K	13	50	10	DMSO	7491-74-9	T0426	Piracetam	UCB-6215	NC(=O)CN1CCCC1=O	C6H10N2O2	142.16	Membrane Transporter/Ion Channel; Neuroscience	GluR; iGluR	AMPA; iGluR	Piracetam, a cyclic derivative of the neurotransmitter gamma-aminobutyric acid (GABA), is used in therapy of the extensive cognitive disorders.	Mingeot-Leclercq MP, et al. Biochim Biophys Acta, 2003, 1609(1), 28-38.	4843	piracetam; 7491-74-9; 2-(2-oxopyrrolidin-1-yl)acetamide; Nootropil; 2-Oxo-1-pyrrolidineacetamide; Nootropyl; Pyracetam; 1-Pyrrolidineacetamide, 2-oxo-; Normabrain; Gabacet; Pyramem; Ciclofalina; Euvifor; Genogris; Nootron; Pirazetam; Pirroxil; 2-Pyrrolidinoneacetamide; Myocalm; 2-Pyrrolidoneacetamide; 2-Oxo-pyrrolidine acetamide; Piracetamum; Breinox; Naofukang; Cl-871; 1-Acetamido-2-pyrrolidinon…	GMZVRMREEHBGGF-UHFFFAOYSA-N	CHEMBL36715	PIRACETAM	Others	Others	GluR; iGluR; Others; Others	Ionotropic glutamate receptors (iGluRs)	iGluR	Gualtieri F, Manetti D, Romanelli MN, Ghelardini C. "Design and study of piracetam-like nootropics, controversial members of the problematic class of cognition-enhancing drugs." Current Pharmaceutical Design 8, no. 2 (2002): 125-138.	hsa04724	Ion channel	iGluR	GluR
M92241	K	14	50	10	DMSO	52432-72-1	T0056	Oxeladin citrate		CCC(CC)(C(=O)OCCOCCN(CC)CC)c1ccccc1.O=C(O)C(O)(CC(=O)O)CC(=O)O	C26H41NO10	527.6	Others	Others	Others	Oxeladin is a highly potent and effective cough suppressant, which can treat all types of cough of various etiologies. It is not related to opium or its derivatives, so treatment with oxeladin is no risk of addiction. And it has none of the side effects (such as hypnosis, respiratory depression, tolerance, constipation and analgesia) which are present when common antitussives, such as codeine and…	Knopp C, Korsatko W. Pharmazie. 1982 Jan;37(1):76-7.	9936727	oxeladin citrate; 52432-72-1; Oxeladin (citrate); Oxeladin citrate salt; Oxeladin citrate [JAN]; Oxeladin Hydrogen Citrate; DTXSID4046608; NSC-759231; Oxeladin citrate (JAN); 2-(2-(Diethylamino)ethoxy)ethyl 2-ethyl-2-phenylbutanoate 2-hydroxypropane-1,2,3-tricarboxylate; 2-[2-(diethylamino)ethoxy]ethyl 2-ethyl-2-phenylbutanoate;2-hydroxypropane-1,2,3-tricarboxylic acid; Oxeladinecitrate; BENZENEA…	KVKJFNUGVOFNGU-UHFFFAOYSA-N	CHEMBL2354637		Others	Others	Others; Others; Others						Others	Others
M92241	K	15	50	10	DMSO	81-23-2	T0408	Dehydrocholic acid	Decholin; Dehystolin; Felacrinos; Sanocholen	C1(=O)CC[C@]2([C@@H](C1)CC(=O)[C@H]1[C@@H]3CC[C@H]([C@@H](CCC(=O)O)C)[C@@]3(C)C(=O)C[C@H]21)C	C24H34O5	402.52	Others	Others	Others	Dehydrocholic acid is a synthetic bile acid, produced by the oxidation of cholic acid.	Yousef IM, et al. Digestion. 1990, 45(1):40-51.	6674	dehydrocholic acid; 81-23-2; Decholin; Dehystolin; Felacrinos; Sanocholen; Dilabil; Ketocholanic acid; Chologon; Oxycholin; Procholon; Bilidren; Bilostat; Cholagon; Cholimed; Dehychol; Didrocolo; Drenobyl; Novocolin; Acolen; Dehycon; Didocol; Erebile; Hykolex; Triketocholanic acid; Deidrocolico Vita; Biochol; Dehycol; Ketochol; Khologon; dehydrocholate; Doxycholpotassium; Cholan DH; Cholic acid, …	OHXPGWPVLFPUSM-KLRNGDHRSA-N	CHEMBL514446	DEHYDROCHOLIC ACID	Others	Others	Others; Others; Others						Others	Others
M92241	K	16	50	10	DMSO	22881-35-2	T0057	Famprofazone	Famprofazon	CC(C)C1=C(CN(C)C(C)CC2=CC=CC=C2)N(C)N(C1=O)C1=CC=CC=C1	C24H31N3O	377.52	Immunology/Inflammation; Neuroscience	COX	COX-1; COX-2	Famprofazone (Gewodin, Gewolen) has analgesic, anti-inflammatory, and antipyretic effects.It is a non-steroidal anti-inflammatory agent (NSAID) of the pyrazolone series.	Chan KH, et al. J Anal Toxicol. 2010 Jul-Aug;34(6):347-53.	3326	Famprofazone; 22881-35-2; Famprofazonum; Famprofazon; Famprofazona; Geodowin; Famprofazone [INN:BAN]; Famprofazonum [INN-Latin]; Famprofazona [INN-Spanish]; 3H-Pyrazol-3-one, 1,2-dihydro-1-methyl-4-(1-methylethyl)-5-[[methyl(1-methyl-2-phenylethyl)amino]methyl]-2-phenyl-; EINECS 245-284-9; UNII-HN0NCX453C; NSC-759244; BRN 5768367; HN0NCX453C; DTXSID3045435; Antipyrine, 4-isopropyl-3-(alpha-(methy…	GNUXVOXXWGNPIV-UHFFFAOYSA-N	CHEMBL1475693	FAMPROFAZONE	Others	Others	COX; Others; Others	COX	COX	Burke A, Smyth EM, Fitzgerald GA. "Analgesic-antipyretic agents; pharmacotherapy of gout." In: Brunton LL, Chabner BA, Knollmann BC, editors. Goodman & Gilman's The Pharmacological Basis of Therapeutics. 12th ed. New York: McGraw-Hill; 2011.	hsa00590 (Arachidonic acid metabolism)	Enzyme	COX	COX
M92241	K	17	50	10	DMSO	120511-73-1	T0393	Anastrozole	ZD1033	CC(C)(C#N)c1cc(cc(Cn2cncn2)c1)C(C)(C)C#N	C17H19N5	293.37	Endocrinology/Hormones	Aromatase	Aromatase	Anastrozole(ZD1033), a potent and highly selective aromatase (CYP19) inhibitor (IC50 = 15 nM), has no obvious effect on adrenocorticoid hormone synthesis.	Dukes M, et al. J Steroid Biochem Mol Biol, 1996, 58(4), 439-445.	2187	anastrozole; 120511-73-1; Arimidex; anastrazole; ZD1033; Anastrozol; 2,2'-(5-((1H-1,2,4-triazol-1-yl)methyl)-1,3-phenylene)bis(2-methylpropanenitrile); ICI D1033; ZD-1033; Anastrole; Asiolex; Zeneca ZD 1033; ZD 1033; ICI-D1033; Arimidex (TN); Anastrozole [USAN:INN:BAN]; HSDB 7462; ICI-D 1033; alpha,alpha,alpha',alpha'-Tetramethyl-5-(1H-1,2,4-triazol-1-ylmethyl)-m-benzenediacetonitrile; UNII-2Z07M…	YBBLVLTVTVSKRW-UHFFFAOYSA-N	CHEMBL1399	ANASTROZOLE	Others	Others	Aromatase; Others; Others	Aromatase	CYP19A1	https://www.ncbi.nlm.nih.gov/pmc/articles/PMC1472822/	hsa00140	Enzyme	Aromatase	Aromatase
M92241	K	18	50	10	DMSO	938-73-8	T0058	2-Ethoxybenzamide	Ethenzamide; Anovigam	CCOc1ccccc1C(=O)N	C9H11NO2	165.19	Immunology/Inflammation; Neuroscience	COX	COX	Anovigam is white or almost-white crystalline powder. Almost odorless. Tasteless. It is widely used as an antipyretic anodyne.	Darias V, et al. Arch Pharm (Weinheim). 1992 Feb;325(2):83-7.	3282	2-ETHOXYBENZAMIDE; ethenzamide; 938-73-8; o-Ethoxybenzamide; Benzamide, 2-ethoxy-; Etenzamide; Ethbenzamide; Anovigam; Ethenzamid; Ethosalicyl; Lucamide; Pirosolvina; Etamide; Etosalicil; Etosalicyl; Katagrippe; Protopyrin; Trancalgyl; Etocil; Eusal; Benzamide, o-ethoxy-; Etenzamide [DCIT]; Etenzamida; Ethenzamidum; Etenzamida [INN-Spanish]; Ethenzamidum [INN-Latin]; 2-Eethoxybenzamide; NSC 28787…	SBNKFTQSBPKMBZ-UHFFFAOYSA-N	CHEMBL1483877	ETHENZAMIDE	Others	Others	COX; Others; Others	Cyclooxygenase (COX)	COX	Rainsford KD. "Aspirin and the Salicylates." Butterworth & Co (Publishers) Ltd, 1984.	hsa00590	enzyme	COX	COX
M92241	K	19	50	10	DMSO	985-13-7	T0369	Ethaverine hydrochloride	Papetherine; Consenil; Ethaquin	CCOc1c(OCC)cc(Cc2nccc3cc(OCC)c(OCC)cc23)cc1.Cl	C24H30ClNO4	431.96	Neuroscience	MAO	MAO	Ethaverine hydrochloride is a homologue of papaverine.	Lee SS, et al. Biol Pharm Bull. 2001 Jul;24(7):838-40.	5702159	Ethaverine hydrochloride; 985-13-7; Ethaquin; ETHAVERINE HCl; Consenil; Papetherine; Laverin; Neopavrin; Paveroid; Perparin; Cebral; Isovex; Perparine; Perperine; Barbonin hydrochloride; 1-(3,4-Diethoxybenzyl)-6,7-diethoxyisoquinoline hydrochloride; Perparin hydrochloride; Perparine hydrochloride; Perperine hydrochloride; Papetherine hydrochloride; Ethaverine (hydrochloride); NSC-525044; DTXSID20…	UPUDVKWQBVIKBG-UHFFFAOYSA-N	CHEMBL1316965	ETHAVERINE HYDROCHLORIDE	Others	Others	MAO; Others; Others						MAO	MAO
M92241	K	20	50	10	DMSO	132-18-3	T0059	Diphenylpyraline hydrochloride	4-Diphenylmethoxy-1-methylpiperidine hydrochloride	Cl.CN1CCC(CC1)OC(c1ccccc1)c1ccccc1	C19H23NOÂ·HCl	317.85	GPCR/G Protein; Immunology/Inflammation; Neuroscience	Histamine Receptor	H1 receptor; Histamine Receptor	Diphenylpyraline Hcl is used in the treatment of Parkinsonism.It is a first-generation antihistamine with anticholinergic effects, functions as a dopamine reuptake inhibitor.	Lapa GB, et al. Eur J Pharmacol. 2005, 506(3):237-40.	66063	Diphenylpyraline hydrochloride; 132-18-3; Diphenylpyraline HCl; Allerzine; 4-Diphenylmethoxy-1-methylpiperidine hydrochloride; Diafen hydrochloride; Histalert; Sumadil; Diafen; Belfene hydrochloride; Hispril hydrochloride; Lergoban; Diphenylpyraline (hydrochloride); Diphenpyraline hydrochloride; Diaphen (VAN); Diafen (VAN); Diafen (antihistamine); Aerogastol; Anginosan; 4-Diphenylmethoxy-1-methyl…	LPRLDRXGWKXRMQ-UHFFFAOYSA-N	CHEMBL1564	DIPHENYLPYRALINE HYDROCHLORIDE	Others	Others	Histamine Receptor; Others; Others	Histamine H1 receptor	HRH1	https://www.drugbank.ca/drugs/DB04839	hsa04080	Receptor	Histamine_Receptor	Histamine Receptor
M92241	K	21	50	10	DMSO	51146-56-6	T0448	Dexibuprofen	(S)-(+)-Ibuprofen; (S)-Ibuprofen	C(C)(C)Cc1ccc(cc1)[C@H](C)C(=O)O	C13H18O2	206.28	Apoptosis; DNA Damage/DNA Repair; Immunology/Inflammation; Metabolism; Neuroscience; Proteases/Proteasome	BCL; COX; Cysteine Protease; PPAR; Thrombin	Bcl-2; COX; Cystic fibrosis transmembrane conductance regulator; PPARÎ³; thrombomodulin	Dexibuprofen, S(+)-ibuprofen, is a non-steroidal anti-inflammatory drug (NSAID), inhibiting cyclooxygenase (COX).	Sanchez-Fidalgo S, et al. Eur J Pharmacol. 2004 Nov 28; 505(1-3):187-94.	39912	(S)-(+)-Ibuprofen; DEXIBUPROFEN; 51146-56-6; (S)-Ibuprofen; (S)-2-(4-Isobutylphenyl)propanoic acid; S(+)-Ibuprofen; (S)-(+)-2-(4-Isobutylphenyl)propionic acid; Seractil; s-ibuprofen; d-Ibuproten; (+)-(S)-p-Isobutylhydratropic acid; (S)-(+)-4-Isobutyl-alpha-methylphenylacetic acid; Dexibuprofene; Dexibuprofeno; Dexibuprofenum; Dexibuprofen (free acid); S-(+)-ibuprofen; (2S)-2-[4-(2-methylpropyl)ph…	HEFNNWSXXWATRW-JTQLQIEISA-N	CHEMBL175	DEXIBUPROFEN	Others	Others	BCL; COX; Cysteine Protease; PPAR; Thrombin; Others; Others	Cyclooxygenase	COX	https://pubchem.ncbi.nlm.nih.gov/compound/Dexibuprofen#section=Pharmacology-and-Biochemistry	hsa00590 (Arachidonic acid metabolism)	Enzyme	COX	BCL
M92241	K	22	50	10	DMSO	882-09-7	T0061	Clofibric acid	Chlorofibrinic acid	C(=O)(C(C)(C)Oc1ccc(cc1)Cl)O	C10H11ClO3	214.65	DNA Damage/DNA Repair; Metabolism	Endogenous Metabolite; PPAR	Drug Metabolite; PPAR	Clofibric acid is an antilipemic agent that is the biologically active metabolite of CLOFIBRATE.	Muerhoff AS, et al. J Biol Chem, 1992, 267(27), 19051-19053.	2797	clofibric acid; 882-09-7; 2-(4-Chlorophenoxy)-2-methylpropanoic acid; Chlorofibrinic acid; 2-(4-CHLOROPHENOXY)-2-METHYLPROPIONIC ACID; Clofibrin; Clofibrinic acid; Chlorfibrinic acid; PCIB; Chlorophibrinic acid; 2-(4-Chlorophenoxy)isobutyric Acid; 2-(p-Chlorophenoxy)-2-methylpropionic acid; Clofibrate free acid; Clofibrinsaeure; Regadrin; Regulipid; PCPIB; Propanoic acid, 2-(4-chlorophenoxy)-2-me…	TXCGAZHTZHNUAI-UHFFFAOYSA-N	CHEMBL683	CLOFIBRIC ACID	Others	Others	Endogenous Metabolite; PPAR; Others; Others	Peroxisome proliferator-activated receptor alpha	PPARÎ±	Vanden Heuvel, J.P. (1999). "Comprehensive Toxicology". Comprehensive Toxicology. 3: 319â€“338.	hsa03320	Nuclear receptor	PPAR	Endogenous Metabolite
M92241	L	3	50	10	DMSO	304-84-7	T0233	Ethamivan	N,N-Diethylvanillamide; Etamivan; N, N-Diethylvanillamide	CCN(CC)C(=O)c1cc(OC)c(O)cc1	C12H17NO3	223.27	Others	Others	Others	Etamivan (INN) or ethamivan (USAN), is a respiratory stimulant drug concerned with nikethamide. Its trade name is Analepticon, and no longer used in the US.	Hirsh K, Wang SC. J Pharmacol Exp Ther. 1975 May; 193(2):657-63.	9363	ETHAMIVAN; Etamivan; Vanillic acid diethylamide; 304-84-7; Emivan; Vandid; Analepticon; Etamivanum; N,N-Diethylvanillamide; Cardiovanil; Corivanil; Diethamivan; Simaron; Diethylvanillamide; Ventilone; Romecor; Sevanil; N,N-Diethyl-4-hydroxy-3-methoxybenzamide; Cardiovamil; Sevinal; Benzamide, N,N-diethyl-4-hydroxy-3-methoxy-; Diethylamide de vanillique; Vanillic acid N,N-diethylamide; Vanillinsae…	BQJODPIMMWWMFC-UHFFFAOYSA-N	CHEMBL1229908	ETHAMIVAN	Others	Others	Others; Others; Others						Others	Others
M92241	L	4	50	10	DMSO	1952-01-07	T0476	Abbolactone	SC9420; Spironolactone	CC(=O)S[C@@H]1CC2=CC(=O)CC[C@@]2([C@@H]3[C@@H]1[C@@H]4CC[C@]5([C@]4(CC3)C)CCC(=O)O5)C	C24H32O4S	416.57	Autophagy; Endocrinology/Hormones	Androgen Receptor; Autophagy; Glucocorticoid Receptor	Androgen Receptor; Mineralocorticoid Receptor; Autophagy	Spironolactone is an Aldosterone Antagonist. The mechanism of action of spironolactone is as an Aldosterone Antagonist.	Fagart J, et al. J Biol Chem, 2010, 285(39), 219932-219940.	5833	spironolactone; 52-01-7; Aldactone; Spirolactone; Verospirone; Verospiron; Euteberol; Spirolang; Spiroctan; Acelat; Aldactone A; Spironocompren; Melarcon; Spiresis; Spiridon; Uractone; Urusonin; Alderon; Spirone; Xenalon; Dira; Spiro-Tablinen; Spironolactone A; spironolattone; Spironolactonum; Aquareduct; Aldopur; Espironolactona; Almatol; Deverol; Aldace; Altex; Abbolactone; Berlactone; Veroshpi…	LXMSZDCAJNLERA-ZHYRCANASA-N	CHEMBL1393	SPIRONOLACTONE	Others	Others	Androgen Receptor; Autophagy; Glucocorticoid Receptor; Others; Others						Androgen_Receptor	Androgen Receptor
M92241	L	5	50	10	DMSO	2856-75-9	T0235	Modaline sulfate		OS(=O)(=O)O.Cc1nccnc1N1CCCCC1	C10H17N3O4S	275.33	Neuroscience	MAO; monoamine oxidase	MAO; Monoamine Oxidase	Modaline was a 2-methyl-3-piperidinopyrazine derivative found to inhibit monoamine oxidase (MAO) and showed a curative effect for the anti-depressant. Similar to other MAO inhibitors, it enhanced convulsions induced by tryptamine and hyperthermia induced by dopa.	Tangri KK, et al. Jpn J Pharmacol. 1972 Oct;22(5):599-604.	17859	MODALINE SULFATE; 2856-75-9; Modaline (sulfate); NSC-89277; Modaline sulfate [USAN]; 2-Methyl-3-piperidinopyrazine sulfate (1:1); W 3207B; 2-Methyl-3-piperidinopyrazine monosulfate; Modaline sulphate; W3207B; W 3207 B; Pyrazine, 2-methyl-3-piperidino-, sulfate; M 7370; UNII-NH3315AI6E; NH3315AI6E; Pyrazine, 2-methyl-3-(1-piperidinyl)-, sulfate (1:1); C10H15N3.H2O4S; Pyrazine, 2-methyl-3-piperidin…	GJXZNORUUOVBKP-UHFFFAOYSA-N	CHEMBL2107444	MODALINE SULFATE	Others	Others	MAO; monoamine oxidase; Others; Others	monoamine oxidase	MAO	Youdim MB, Edmondson D, Tipton KF. "The therapeutic potential of monoamine oxidase inhibitors." Nature Reviews Neuroscience 7, no. 4 (2006): 295-309.	hsa00260	enzyme	MAO	MAO
M92241	L	6	50	10	DMSO	485-35-8	T0479	Cytisine	Baptitoxine; Sophorine; Cytisinicline; Baphitoxine	O=c1cccc2[C@H]3CNC[C@H](C3)Cn12	C11H14N2O	190.25	Neuroscience	AChR	nAChR	Cytisine, an alkaloid, is found naturally in several plants.	Walker N, et al. N Engl J Med. 2014 Dec 18;371(25):2353-62.	10235	CYTISINE; 485-35-8; Baptitoxine; Sophorine; Cytisinicline; Cytiton; Tabex; Baptitoxin; Laburnin; Ulexine; Ulexin; (-)-Cytisine; Cytitone; Tsitizin; Tabax; Cystisine; Citizin; Cytisin; Cytizin; Baphitoxine; 6039 Sopharma; (1R,5S)-3,4,5,6-Tetrahydro-1H-1,5-methanopyrido[1,2-a][1,5]diazocin-8(2H)-one; (1r,5s)-1,2,3,4,5,6-Hexahydro-8h-1,5-Methanopyrido[1,2-A][1,5]diazocin-8-One; HSDB 3560; EINECS 207…	ANJTVLIZGCUXLD-DTWKUNHWSA-N	CHEMBL497939	CYTISINICLINE	Others	Others	AChR; Others; Others	nicotinic acetylcholine receptors	AChR	Coe JW, Brooks PR, Vetelino MG, et al. "Varenicline: an alpha4beta2 nicotinic receptor partial agonist for smoking cessation." Journal of Medicinal Chemistry. 2005 May 19;48(10):3474-7. doi: 10.1021/jm050069n.	hsa04080	receptor	AChR	AChR
M92241	L	7	50	10	DMSO	4386-39-4	T0238	2-(Acetyloxy)-3-Methylbenzoic Acid		CC(=O)Oc1c(cccc1C)C(=O)O	C10H10O4	194.18	Others	others	hydroxysteroid (17-beta) dehydrogenase 4 (HSD17B4)	2-(Acetyloxy)-3-Methylbenzoic Acid is used in qHTS Assay for Inhibitors of hydroxysteroid (17-beta) dehydrogenase 4, HSD17B4 with activity value of 19.95 Î¼M		78094	4386-39-4; Cresopirine; 2-(Acetyloxy)-3-methylbenzoic acid; 2-Acetoxy-3-methylbenzoic acid; 2-acetyloxy-3-methylbenzoic acid; CRESOPYRINE; 2-Acetoxy-m-toluic acid; 2-Acetoxy-3-methyl-benzoic acid; UNII-2G83E641HZ; 2G83E641HZ; EINECS 224-499-1; NSC-49105; Cresopyrine; NSC 49105;AGN 357; Acetyl-o-cresotic acid; 3-methylacetylsalicylic acid; NSC49105; Spectrum_001374; Maybridge3_006075; Spectrum2_00…	XRBMKGUDDJPAMH-UHFFFAOYSA-N	CHEMBL1234172		Others	Others	others; Others; Others						Others	others
M92241	L	8	50	10	DMSO	94-20-2	T0490	Chlorpropamide	Diabinese	CCCNC(=O)NS(=O)(=O)c1ccc(Cl)cc1	C10H13ClN2O3S	276.74	Membrane transporter/Ion channel	ABC; ATPase	ABCC8; Na+/K+ ATPase	Chlorpropamide is a sulfonylurea hypoglycemic agent used in the treatment of non-insulin-dependent diabetes mellitus not responding to dietary modification.	Monge L, et al. Diabetes, 1986, 35(1), 89-96.	2727	chlorpropamide; 94-20-2; Chloropropamide; Diabinese; Glucamide; Meldian; Chlorpropamid; Diabenese; Chlorodiabina; Chloronase; Diabeneza; Diabetoral; Adiaben; Catanil; Diabaril; Dynalase; Insulase; Melitase; Diabechlor; Diabenal; Mellinese; Millinese; Asucrol; Glisema; Oradian; Diabet-Pages; Diamel Ex; 1-(4-Chlorophenylsulfonyl)-3-propylurea; Clorpropamid; Clorpropamide; Diabexan; Prodiaben; 4-chl…	RKWGIWYCVPQPMF-UHFFFAOYSA-N	CHEMBL498	CHLORPROPAMIDE	Others	Others	ABC; ATPase; Others; Others	Sulfonylurea receptor 1 (SUR1)	ABCC8	https://www.ncbi.nlm.nih.gov/pmc/articles/PMC1857231/	hsa04911	ATP-binding cassette (ABC) transporter	Sulfonylurea_Receptor	ABC
M92241	L	9	50	10	DMSO	17692-71-6	T0243	Vanitiolide	Vanitiolid	COc1cc(ccc1O)C(=S)N1CCOCC1	C12H15NO3S	253.32	Others	Others	Others	A choleretic.	QHTS Assay For Inhibitors Of Aldehyde Dehydrogenase 1 (ALDH1A1)	72146	Vanitiolide; 17692-71-6; Vanitiolid; Bildux; 4-(Thiovanilloyl)morpholine; Vanitiolida; Vanitiolidum; Morpholine, 4-(thiovanilloyl)-; Vanitiolide [INN:DCF]; Vanitiolidum [INN-Latin]; UNII-26Y8H6WPAW; NSC-406669; Vanitiolida [INN-Spanish]; 26Y8H6WPAW; (4-Hydroxy-3-methoxy-phenyl)-morpholin-4-yl-methanethione; DTXSID4046107; 4-(4-hydroxy-3-methoxyphenylthiocarbonyl)morpholine; EINECS 241-690-5; (4-H…	WQYRHRAZNNRDIA-UHFFFAOYSA-N	CHEMBL1380480	VANITIOLIDE	Others	Others	Others; Others; Others						Others	Others
M92241	L	10	50	10	DMSO	624-49-7	T0492	Dimethyl fumarate	DMF	COC(=O)/C=C/C(=O)OC	C6H8O4	144.13	Autophagy; Immunology/Inflammation; Metabolism; Microbiology/virology; Proteases/Proteasome	Autophagy; Endogenous Metabolite; HIV Protease; ROS	KEAP1-Nrf2; Reactive Oxygen Species; HIV; Autophagy; Endogenous Metabolite	Dimethyl fumarate, a fumarate derivative, is used as antiinflammatory and immunomodulatory agent.	Albrecht P, et al. J Neuroinflammation,2012, 9, 163.	637568	Dimethyl fumarate; 624-49-7; Tecfidera; Dimethylfumarate; Methyl fumarate; Fumaderm; (E)-Dimethyl fumarate; Fumaric acid, dimethyl ester; Fumaric acid dimethyl ester; BG-12; Dimethyl (E)-but-2-enedioate; Boletic acid dimethyl ester; BG 12 compound; Panaclar; Dimethyl trans-ethylenedicarboxylate; trans-Butenedioic acid dimethyl ester; Allomaleic acid dimethyl ester; dimethyl (2E)-but-2-enedioate; …	LDCRTTXIJACKKU-ONEGZZNKSA-N	CHEMBL2107333	DIMETHYL FUMARATE	Others	Others	Autophagy; Endogenous Metabolite; HIV Protease; ROS; Others; Others	Nuclear factor (erythroid-derived 2)-like 2 (Nrf2)	NFE2L2	https://pubmed.ncbi.nlm.nih.gov/23517636/	hsa04152	Transcription Factor	Nrf	Autophagy
M92241	L	11	50	10	DMSO	115007-34-6	T0245	RS 61443	Mycophenolate Mofetil; TM-MMF	O=C(OCCN1CCOCC1)CC/C(C)=C/CC2=C(O)C3=C(COC3=O)C(C)=C2OC	C23H31NO7	433.5	Metabolism	Dehydrogenase	IMPDH	RS 61443 is an immunosuppressant, a non-competitive, selective and reversible inhibitor of inosine monophosphate dehydrogenase (IMPDH)	Zwerner J , Fiorentino D . Mycophenolate mofetil[J]. Dermatologic Therapy, 2010, 20(4):229-238.	5281078	mycophenolate mofetil; 128794-94-5; CellCept; 115007-34-6; RS 61443; Myfenax; RS-61443; TM-MMF; myclausen; Mycophenylate mofetil; Munoloc; Mycophenolic acid morpholinoethyl ester; Mycophenolatemofetil; Mycophenolate mofetil Teva; Cellcept (TN); CHEBI:8764; MMF CellCept(TM); HSDB 7436; ME-MPA; (E)-2-Morpholinoethyl 6-(4-hydroxy-6-methoxy-7-methyl-3-oxo-1,3-dihydroisobenzofuran-5-yl)-4-methylhex-4-…	RTGDFNSFWBGLEC-SYZQJQIISA-N	CHEMBL1456	MYCOPHENOLATE MOFETIL	Others	Others	Dehydrogenase; Others; Others	Inosine-5'-monophosphate dehydrogenase (IMPDH)	IMPDH	https://www.ncbi.nlm.nih.gov/pmc/articles/PMC2040187/	hsa00230	Dehydrogenase	IMPDH	Dehydrogenase
M92241	L	11	50	10	DMSO	115007-34-6	T0245	RS 61443	Mycophenolate Mofetil; TM-MMF	O=C(OCCN1CCOCC1)CC/C(C)=C/CC2=C(O)C3=C(COC3=O)C(C)=C2OC	C23H31NO7	433.5	Metabolism	Dehydrogenase	IMPDH	RS 61443 is an immunosuppressant, a non-competitive, selective and reversible inhibitor of inosine monophosphate dehydrogenase (IMPDH)	Zwerner J , Fiorentino D . Mycophenolate mofetil[J]. Dermatologic Therapy, 2010, 20(4):229-238.	5281078	mycophenolate mofetil; 128794-94-5; CellCept; 115007-34-6; RS 61443; Myfenax; RS-61443; TM-MMF; myclausen; Mycophenylate mofetil; Munoloc; Mycophenolic acid morpholinoethyl ester; Mycophenolatemofetil; Mycophenolate mofetil Teva; Cellcept (TN); CHEBI:8764; MMF CellCept(TM); HSDB 7436; ME-MPA; (E)-2-Morpholinoethyl 6-(4-hydroxy-6-methoxy-7-methyl-3-oxo-1,3-dihydroisobenzofuran-5-yl)-4-methylhex-4-…	RTGDFNSFWBGLEC-SYZQJQIISA-N	CHEMBL1456	MYCOPHENOLATE MOFETIL	Others	Others	Dehydrogenase; Others; Others	Inosine-5'-monophosphate dehydrogenase (IMPDH)	IMPDH	https://www.ncbi.nlm.nih.gov/pmc/articles/PMC3082477/	hsa00230	Dehydrogenase	IMPDH	Dehydrogenase
M92241	L	12	50	10	DMSO	5086-74-8	T0494	Tetramisole hydrochloride	DL-Tetramisole hydrochloride; R-829; (Â±)-Tetramisole hydrochloride; Tetramisole HCl	Cl.C1CN2CC(N=C2S1)c1ccccc1	C11H12N2SÂ·HCl	240.75	Metabolism; Microbiology/virology	Antibiotic; Dehydrogenase; Parasite; Phosphatase	Parasite; Phosphatase; Antibiotic; SDH	Tetramisole is used as an anthelmintic.	Raeymaekers AH, et al. J Med Chem, 1966, 9(4), 545-551.	68628	Tetramisole hydrochloride; 5086-74-8; Anthelvet; Tetramisole HCl; Citarin; Concurat; Tetramisole (hydrochloride); Ascarotrat; Nilverom; Ripercol; Nilverm; Pig Wormer; Orovermol; Solaskil hydrochloride; McN-JR-8299-11; Citarin (VAN); McN JR 8299; R 8299; 6-phenyl-2,3,5,6-tetrahydroimidazo[2,1-b][1,3]thiazole hydrochloride; Bayer 9051; Tetramisole hydrochloride [USAN]; 6-phenyl-2,3,5,6-tetrahydroim…	LAZPBGZRMVRFKY-UHFFFAOYSA-N	CHEMBL554891	TETRAMISOLE HYDROCHLORIDE	Others	Others	Antibiotic; Dehydrogenase; Parasite; Phosphatase; Others; Others	Levamisole-sensitive acetylcholine receptor	nAChR	Martin, Richard J.. "Modes of action of anthelmintic drugs." Veterinary Journal 154.1 (1997): 11-34.		Ligand-gated ion channel	AChR	Antibiotic
M92241	L	13	50	10	DMSO	5874-97-5	T0277	Orciprenaline sulfate	Metaproterenol Sulfate	c1(cc(cc(c1)C(CNC(C)C)O)O)O.S(=O)(=O)(O)O.c1(cc(cc(c1)C(CNC(C)C)O)O)O	C11H17NO3Â·0Â·5H2O4S	260.3	GPCR/G Protein; Neuroscience	Adrenergic Receptor	Adrenergic Receptor; Î²-adrenergic receptor	Orciprenaline sulfate is a beta-2 adrenergic agonist used in the treatment of ASTHMA and BRONCHIAL SPASM.	Kimura M, et al. J Pharmacol Exp Ther. 1999 Oct;291(1):171-80.	441333	Metaproterenol sulfate; 5874-97-5; Orciprenaline sulfate; Metaproterenol hemisulfate; Metaproterenol hemisulfate salt; Metaproterenol sulphate; Orciprenaline sulphate; Alupent; Prometa; Orciprenaline (hemisulfate); Metaproterenol (hemisulfate); Metaproterenol sulfate [USAN]; DTXSID4045391; TH-152; Novasmasol; Metaprel; Alotec; Alupent (TN); Metaproterenol sulfate, orciprenaline sulfate; DTXCID202…	MKFFGUZYVNDHIH-UHFFFAOYSA-N	CHEMBL1568057	METAPROTERENOL SULFATE	Others	Others	Adrenergic Receptor; Others; Others	Beta-2 adrenergic receptor	ADRB2	https://www.drugbank.ca/drugs/DB00816	hsa04080	G protein-coupled receptor	Adrenergic_Receptor	Adrenergic Receptor
M92241	L	14	50	10	DMSO	96-50-4	T0495	Aminothiazole	2-Thiazolylamine; 2-Aminothiazole	Nc1nccs1	C3H4N2S	100.14	Microbiology/virology	Antibacterial; Antibiotic; Antifungal; Virus Protease	Antibiotic; Bacterial; Fungal; Virus Protease	Aminothiazole, a thyroid inhibitor, displays antibacterial activity.	Edwards JA, et al. Antimicrob Agents Chemother, 2013.	2155	2-AMINOTHIAZOLE; aminothiazole; 96-50-4; thiazol-2-amine; 2-Thiazolamine; 1,3-Thiazol-2-amine; 2-Thiazolylamine; Abadole; Abadol; Basedol; 2-Thiazylamine; 4-Thiazolin-2-onimine; Thiazolamine; 2-Amino-1,3-thiazole; 2-Aminothiazol; Aminothiazol; Aminothiazolum; Aminotiazol; Aminothiazole [INN]; Thiazole, 2-amino-; RP 2921; 2-amino thiazole; USAF EK-P-5501; Thiazol-2-ylamine; Aminotiazolo [DCIT]; Am…	RAIPHJJURHTUIC-UHFFFAOYSA-N	CHEMBL344760	AMINOTHIAZOLE	Others	Others	Antibacterial; Antibiotic; Antifungal; Virus Protease; Others; Others						Antibacterial	Antibacterial
M92241	L	15	50	10	DMSO	6933-90-0	T0248	Clorprenaline hydrochloride	Clorprenaline HCl; NSC 334693	Cl.CC(C)NCC(O)c1ccccc1Cl	C11H17Cl2NO	250.16	GPCR/G Protein; Neuroscience	Adrenergic Receptor	Adrenergic Receptor; Î²-adrenergic receptor	Clorprenaline Hydrochloride is a beta-2 adrenergic agonist with bronchodilator activity.	Shen S, et al. J Pharm Biomed Anal, 2005, 38(1), 166-172.	23360	clorprenaline hydrochloride; 6933-90-0; 1-(2-Chlorophenyl)-2-(isopropylamino)ethanol hydrochloride; Clorprenaline HCl; USAF EL-50; Isoprophenamine (VAN); NSC 334693; Clorprenaline hydrochloride anhydrous; Isoprophenamine hydrochloride; Isoprophenamine; EINECS 230-058-4; UNII-H34A8V28IT; H34A8V28IT; DTXSID5046699; 1-(2-chlorophenyl)-2-(propan-2-ylamino)ethanol;hydrochloride; N-Isopropyl-2-hydroxy-…	CPCPUCRSKRHVAH-UHFFFAOYSA-N	CHEMBL2106149	CLORPRENALINE HYDROCHLORIDE	Others	Others	Adrenergic Receptor; Others; Others	Beta-adrenergic receptors	ADRB	"Lemoine H, Kaumann AJ. Direct labelling of myocardial Î²1-adrenoceptors. Comparison of binding affinity of 3H-(âˆ’)-bisoprolol with its blocking potency. Naunyn Schmiedebergs Arch Pharmacol. 1985;330(2):121-30."	hsa04080	G protein-coupled receptor	Adrenergic_Receptor	Adrenergic Receptor
M92241	L	16	50	10	DMSO	57-09-0	T0497	Cetrimonium bromide	CTAB; Lauroseptol; Cetyltrimethylammonium Bromide	[Br-].CCCCCCCCCCCCCCCC[N+](C)(C)C	C19H42BrN	364.46	Microbiology/virology	Antibiotic	Antibiotic	Cetrimonium Bromide is is a mixture of different quaternary ammonium salts, which is a known component of the broad-spectrum antiseptic cetrimide.	Ito E, et al. Mol Pharmacol, 2009, 76(5), 969-983.	5974	Cetrimonium bromide; 57-09-0; Cetyltrimethylammonium bromide; Hexadecyltrimethylammonium bromide; CTAB; Bromat; CETAB; Centimide; Ctmab; Cee dee; Acetoquat CTAB; Cetyl trimethyl ammonium bromide; Hexadecyl trimethyl ammonium bromide; Trimethylcetylammonium bromide; Lauroseptol; Lissolamine; Cetaflon; Cetarol; Pollacid; Quamonium; Micol; Cetrimide bp; Cetavlon bromide; Lissolamine A; Lissolamin V;…	LZZYPRNAOMGNLH-UHFFFAOYSA-M	CHEMBL307346	CETRIMONIUM BROMIDE	Others	Others	Antibiotic; Others; Others					Surfactant	Antibiotic	Antibiotic
M92241	L	17	50	10	DMSO	32795-44-1	T0249	Acecainide	NAPA; N-Acetylprocainamide	CCN(CC)CCNC(=O)c1ccc(NC(=O)C)cc1	C15H23N3O2	277.36	Membrane transporter/Ion channel; Metabolism	Endogenous Metabolite; Potassium Channel; Sodium Channel	Potassium Channel; Drug Metabolite; Sodium Channel	N-Acetylprocainamide, the N-acetylated metabolite of Procainamide, is a Class III antiarrhythmic agent, while procainamide is a Class Ia antiarrhythmic drug.	Weiss R, et al. Circulation. 2002 Feb 12;105(6):707-13.	4342	N-Acetylprocainamide; Acecainide; 32795-44-1; NAPA; Acekainid; Acecainida; Acecainidum; N-Acetyloprokainamid; Acetylprocainamide; Acecainide [INN]; 4'-((2-(Diethylamino)ethyl)carbamoyl)acetanilide; Acekainid [Polish]; N-Acetylprocaine amide; Acecainidum [INN-Latin]; Acecainide;NAPA; Acecainida [INN-Spanish]; Benzamide, 4-(acetylamino)-N-(2-(diethylamino)ethyl)-; 4-acetamido-N-[2-(diethylamino)eth…	KEECCEWTUVWFCV-UHFFFAOYSA-N	CHEMBL1097	ACECAINIDE	Others	Others	Endogenous Metabolite; Potassium Channel; Sodium Channel; Others; Others	Sodium Channel	NaC	https://pubchem.ncbi.nlm.nih.gov/compound/Acecainide	hsa04020	Ion channel	Sodium_Channel	Endogenous Metabolite
M92241	L	18	50	10	DMSO	773-76-2	T0500	Capitrol	Chloroxine	Oc1c(Cl)cc(Cl)c2c1nccc2	C9H5Cl2NO	214.05	Microbiology/virology	Antibacterial; Antibiotic	Antibiotic; Bacterial	Capitrol is a synthetic quinoline derivative with antibacterial activity. Although the mechanism of action is not fully understood, topical administration of chloroxine diminishes mitotic activity in the epidermis, thereby reducing excessive scaling associated with dandruff or seborrheic dermatitis of the scalp, including psoriasis and eczema.	Malaveille C, et al. IARC Sci Publ. 1991;(115):261-6.	2722	chloroxine; 773-76-2; 5,7-Dichloroquinolin-8-ol; 5,7-Dichloro-8-hydroxyquinoline; 5,7-Dichloro-8-quinolinol; Capitrol; Chlorquinol; Dichloroxin; Quixalin; Chloroxyquinoline; Dichloroquinolinol; Dikhloroskin; Clofuzid; Endiaron; Quinolor; Dichlorohydroxyquinoline; Chlofucid; Quesyl; 5,7-Dichlorooxine; 5,7-Dichloroxine; 8-QUINOLINOL, 5,7-DICHLORO-; 5,7-Dichloro-8-oxyquinoline; Chlorohydroxyquinolin…	WDFKMLRRRCGAKS-UHFFFAOYSA-N	CHEMBL1200596	CHLOROXINE	Others	Others	Antibacterial; Antibiotic; Others; Others					Antibacterial	Antibacterial	Antibacterial
M92241	L	19	50	10	DMSO	93107-08-5	T0250	Ciprofloxacin hydrochloride	Bay-09867 (hydrochloride); Ciprofloxacin HCl	Cl.OC(=O)c1cn(C2CC2)c2cc(N3CCNCC3)c(F)cc2c1=O	C17H18FN3O3Â·HCl	367.8	DNA Damage/DNA Repair; Microbiology/virology	Antibacterial; Antibiotic; DNA gyrase; Topoisomerase	Bacterial; Antibiotic; DNA gyrase; Topo II; Topo IV	Ciprofloxacin hydrochloride is a broad-spectrum antimicrobial carboxyfluoroquinoline.	Lee JK, et al. Microbiol Immunol. 2005;49(7):647-53.	62999	Ciprofloxacin hydrochloride; 93107-08-5; Ciprofloxacin HCl; 86483-48-9; 1-cyclopropyl-6-fluoro-4-oxo-7-(piperazin-1-yl)-1,4-dihydroquinoline-3-carboxylic acid hydrochloride; Cipro; Ciprofloxacin Hydrochloride Anhydrous; CHEBI:310388; UNII-0MP32MFP6C; 0MP32MFP6C; Cetraxal; Flociprin; Ciflox; BAY-o 9867; DTXSID1047788; ciprofloxacin hydrochloride (anh.); 1-cyclopropyl-6-fluoro-1,4-dihydro-4-oxo-7-(…	DIOIOSKKIYDRIQ-UHFFFAOYSA-N	CHEMBL1202	CIPROFLOXACIN HYDROCHLORIDE	Others	Others	Antibacterial; Antibiotic; DNA gyrase; Topoisomerase; Others; Others	DNA gyrase and Topoisomerase IV	GYRAB/Topo IV	https://www.ncbi.nlm.nih.gov/pmc/articles/PMC4381198/	hsa03030 (DNA replication)	Enzymes	Topoisomerase	Antibacterial
M92241	L	20	50	10	DMSO	150-76-5	T0501	4-Methoxyphenol	Mequinol; Leucobasal; 4-Hydroxyanisole	COc1ccc(O)cc1	C7H8O2	124.14	Others	Others	radical polymerization	Leucobasal is a synthetic derivate of hydroquinone and depigmenting agent. Although the exact mechanism of the depigmenting effects of mequinol remains unclear, it may exert its effect by oxidation of tyrosinase to cytotoxic products in melanocytes.	Bessou S, et al. Arch Dermatol, 1997, 133(3), 331-336.	9015	4-Methoxyphenol; Mequinol; 150-76-5; 4-Hydroxyanisole; p-Hydroxyanisole; p-Methoxyphenol; HYDROQUINONE MONOMETHYL ETHER; Phenol, 4-methoxy-; Leucobasal; MEHQ; Leucodine B; Mechinolum; P-Guaiacol; Novo-Dermoquinona; Hydroquinone methyl ether; HQMME; p-Hydroxymethoxybenzene; para-methoxyphenol; 1-Hydroxy-4-methoxybenzene; Monomethyl ether hydroquinone; PMF (antioxidant); Phenol, p-methoxy-; USAF AN…	NWVVVBRKAWDGAB-UHFFFAOYSA-N	CHEMBL544	MEQUINOL	Others	Others	Others; Others; Others						Others	Others
M92241	L	21	50	10	DMSO	155-41-9	T0253	Methscopolamine	Hyoscine methyl bromide; (-)-Scopolamine methyl bromide; Methscopolamine bromide	[Br-].C[N+]1(C)[C@@H]2C[C@H](C[C@H]1[C@@H]1O[C@H]21)OC(=O)[C@H](CO)c1ccccc1	C18H24BrNO4	398.29	Neuroscience	AChR	mAChR	Methscopolamine (Pamine), as a natural plant alkaloid, is aÂ muscarinic acetylcholine receptorÂ blocker.	Soukup O, et al. Neurotox Res. 2009 Nov;16(4):372-7.	5459110	METHSCOPOLAMINE BROMIDE; 155-41-9; Holopon; Hyoscine Methobromide; (-)-Scopolamine methyl bromide; scopolamine methyl bromide; Pamine; Methscopolamine (bromide); Hyoscine methyl bromide; Scopolamine methobromide; N-Methylhyoscinium bromide; Proscomide; Methylscopolamine bromide; Scopolamine methylbromide; UNII-RTN51LK7WL; RTN51LK7WL; N-Methylscopolamine Bromide; Ampyrox; Mescopil; Paraspan; Restr…	CXYRUNPLKGGUJF-OZVSTBQFSA-M			Others	Others	AChR; Others; Others	Muscarinic acetylcholine receptors	mAChR	https://pubchem.ncbi.nlm.nih.gov/compound/Methscopolamine#section=Pharmacology-and-Biochemistry	hsa04080	G protein-coupled receptor	AChR	AChR
M92241	L	22	50	10	DMSO	13463-41-7	T0502	Zinc pyrithione	OM-1563	[O-][n+]1ccccc1S[Zn]Sc1cccc[n+]1[O-]	C10H8N2O2S2Zn	317.7	Membrane transporter/Ion channel; Microbiology/virology	Antibacterial; Antifungal; Proton pump	Bacterial; Fungal; Proton pump	Zinc pyrithione, an antibacterial and antifungal agent can disrupt membrane transport by blocking the proton pump.	Ermolayeva E, et al. Appl Environ Microbiol, 1995, 61(9), 3385-3390.	26041	Zinc pyrithione; Bis((1-oxidopyridin-2-yl)thio)zinc; zinc;1-oxidopyridin-1-ium-2-thiolate; OM-1563; 1-Hydroxypyridine-2-thione zinc; NCGC00091933-01; NCGC00183121-01; DTXSID7026314; DTXCID90820451; zinc bis(2-thioxopyridin-1(2H)-olate); 1698050-37-1; CAS-13463-41-7; Zinc Pyrithione Powder; Zinci pyrithionum; Zinc pt; Finecide ZPT; Hokucide ZPT; Niccanon SKT; Biocut ZP; ZNP bar; Tomicide Z 50; Tom…	OTPSWLRZXRHDNX-UHFFFAOYSA-L	CHEMBL1200471	PYRITHIONE ZINC	Others	Others	Antibacterial; Antifungal; Proton pump; Others; Others	Antibacterial and Antifungal		https://www.ncbi.nlm.nih.gov/pmc/articles/PMC413092/		Antimicrobial agent	Antibacterial_and_Antifungal	Antibacterial
M92241	M	3	50	10	DMSO	5560-59-8	T0428	Alverine citrate	NSC 35459	OC(=O)CC(O)(CC(=O)O)C(=O)O.CCN(CCCc1ccccc1)CCCc1ccccc1	C26H35NO7	473.57	GPCR/G Protein; Neuroscience	5-HT Receptor	5-HT; 5-HT Receptor	Alverine Citrate is utilized in functional gastrointestinal disorders.	Mitchell SA, et al, Aliment Pharmacol Ther, 2002, 16(6), 1187-1195.	21718	ALVERINE CITRATE; 5560-59-8; Alverine (citrate); Antispasmin; Spacolin; Gamatran citrate; NSC 35459; ALVERINE CITRATE SALT; Calmabel; Profenine; Prophelan; Proverine; Profenil citrate; NCI 85x; Alverine citrate [USAN]; NSC-35459; Alverine dihydrogen citrate; UNII-9JFB58YK1E; PHENPROPAMINE CITRATE; N-Ethyl-3,3'-diphenyldipropylamine citrate (1:1); 9JFB58YK1E; Alverine citrate [USAN:NF]; MLS0000695…	RYHCACJBKCOBTJ-UHFFFAOYSA-N	CHEMBL1408594	ALVERINE CITRATE	Others	Others	5-HT Receptor; Others; Others	5-HT Receptor	5HTR	"Alverine citrate, a serotonin 5-HT1A receptor antagonist, in the treatment of irritable bowel syndrome and peptic ulcer disease." British Journal of Pharmacology, 1991.	hsa04080	G protein-coupled receptor	5-HT	5-HT Receptor
M92241	M	4	50	10	DMSO	2398-81-4	T0067	Nicotinic acid N-oxide	Oxiniacic Acid; Nicotinic acid 1-oxide	OC(=O)c1c[n+]([O-])ccc1	C6H5NO3	139.11	Others	Others	Others	Oxiniacic Acid is a nicotinic acid derivative, used to treat hyperlipoidemia.	Atac A, et al. Spectrochim Acta A Mol Biomol Spectrosc. 2012 Jan;85(1):145-54.	16976	Nicotinic acid N-oxide; 2398-81-4; Oxiniacic acid; Nicotinic acid 1-oxide; 3-Carboxypyridine 1-oxide; 3-Pyridinecarboxylic acid, 1-oxide; Nicotinic acid oxide; 1-oxidopyridin-1-ium-3-carboxylic acid; N-Hydroxynicotinic acid; 3-Carboxypyridine N-oxide; 3-Pyridinecarboxylic acid oxide; Acido oxiniacico; Acide oxiniacique; Pyridine-3-carboxylic acid N-oxide; Acidum oxiniacicum; pyridine-3-carboxylic…	FJCFFCXMEXZEIM-UHFFFAOYSA-N	CHEMBL1591725	OXINIACIC ACID	Others	Others	Others; Others; Others						Others	Others
M92241	M	5	50	10	DMSO	131-69-1	T0409	Phthalylsulfacetamide	Tamid; Enterosulfamid; Enterosulfon	CC(=O)NS(=O)(=O)c1ccc(NC(=O)c2ccccc2C(=O)O)cc1	C16H14N2O6S	362.36	Microbiology/virology	Antibacterial	Antibacterial; Bacterial	Phthalylsulfacetamide is a sulfonamide antibiotic used for topical application to the skin and the conjunctiva.	ASHER LM. Gastroenterology. 1958 Apr; 34(4):659-60.	8574	PHTHALYLSULFACETAMIDE; 131-69-1; Tamid; Enterosulfamid; Enterosulfon; Ftalicetimida; Talicetimida; Enterocid; Sulphalyl; Talsigel; Thalocid; Phthalylsulphacetamide; Enterosulphamid; Sterathal; Talasulfa; Talsutin; Thalajen; Thalamyd; Thalisul; Kalacet; Rabalan; Talecid; Phthaloylsulfacetamide; 4'-(Acetylsulfamoyl)phthalanilic acid; Phthalylsulfacetamid; Phthalylsulfacetimide; Phthalylthioacetamid…	SNWQKAWITMVCQW-UHFFFAOYSA-N	CHEMBL2106951	PHTHALYLSULFACETAMIDE	Others	Others	Antibacterial; Others; Others						Antibacterial	Antibacterial
M92241	M	6	50	10	DMSO	146-56-5	T0068	Fluphenazine hydrochloride	Fluphenazine dihydrochloride; Prolixin	Cl.OCCN1CCN(CCCN2c3ccccc3Sc3c2cc(cc3)C(F)(F)F)CC1.Cl	C22H28Cl2F3N3OS	510.44	GPCR/G Protein; Neuroscience	Dopamine Receptor	Dopamine; Dopamine Receptor	Fluphenazine dihydrochloride is an inhibitor of phenothiazine-class D1DR and D2DR; In studies, Fluphenazine can be used to probe the effects and metabolic process of this commonly used dopamine antagonist.	Qin ZH, Weiss B. Eur J Pharmacol. 1994 Sep 15;269(1):25-33.	67356	Fluphenazine dihydrochloride; Fluphenazine hydrochloride; 146-56-5; Prolixin; Anatensol; Permitil; Moditen; Fluphenazine (dihydrochloride); Tensofin; Squibb 4918; Calmansial; Lyorodin; Mirenil; OMCA; Trancin; Liogen; FLUPHENAZINE HCL; Dapotum; Flufenazin; Fluphenazine chloride; Permitil hydrochloride; Fluorophenazine dihydrochloride; CCRIS 4032; EINECS 205-674-1; UNII-ZOU145W1XL; NSC 179197; ZOU1…	MBHNWCYEGXQEIT-UHFFFAOYSA-N	CHEMBL1448187	FLUPHENAZINE HYDROCHLORIDE	Others	Others	Dopamine Receptor; Others; Others	Dopamine Receptor	DRD	https://www.ncbi.nlm.nih.gov/pmc/articles/PMC1615747/	hsa04080	G protein-coupled receptor	Dopamine	Dopamine Receptor
M92241	M	7	50	10	DMSO	132203-70-4	T0388	Cilnidipine	FRC-8653	COCCOC(=O)C1=C(C)NC(=C(C1c1cc(ccc1)[N+](=O)[O-])C(=O)OC/C=C/c1ccccc1)C	C27H28N2O7	492.53	Membrane transporter/Ion channel; Metabolism	Calcium Channel	Calcium Channel; Dual L-and N-type calcium channel	Cilnidipine(FRC8653) is a dual L- and N-type calcium channel blocker and displays antihypertensive, sympatholytic and neuroprotective activity.	Takahara A, et al. Hypertens Res,2003, 26(9), 743-747.	5282138	cilnidipine; 132203-70-4; Cinalong; Siscard; Atelec; FRC-8653; FRC 8653; 3-cinnamyl 5-(2-methoxyethyl) 2,6-dimethyl-4-(3-nitrophenyl)-1,4-dihydropyridine-3,5-dicarboxylate; Cilnidipine [INN]; Cinaldipine; CHEBI:31399; UNII-97T5AZ1JIP; 97T5AZ1JIP; Atelec (TN); (+-)-(E)-Cinnamyl 2-methoxyethyl 1,4-dihydro-2,6-dimethyl-4-(m-nitrophenyl)-3,5-pyridinedicarboxylate; DTXSID0046309; Cilnidipine, (+)-; Ci…	KJEBULYHNRNJTE-DHZHZOJOSA-N	CHEMBL452076	CILNIDIPINE	Others	Others	Calcium Channel; Others; Others	L-type and N-type calcium channels	CACNA1C, CACNA1B	https://www.ncbi.nlm.nih.gov/pmc/articles/PMC4011563/	hsa04020	Channel blocker	Calcium_Channel	Calcium Channel
M92241	M	8	50	10	DMSO	103-90-2	T0065	Acetaminophen	4'-Hydroxyacetanilide; 4-Acetamidophenol; APAP; Paracetamol	CC(=O)Nc1ccc(O)cc1	C8H9NO2	151.16	Chromatin/Epigenetic; Immunology/Inflammation; Metabolism; Neuroscience	COX; Endogenous Metabolite; Histone Acetyltransferase	COX-1; COX-2; COX; Histone Acetyltransferase; Endogenous Metabolite	Analgesic antipyretic derivative of acetanilide. Acetaminophen has weak anti-inflammatory properties and is used as a common analgesic, but may cause liver, blood cell, and kidney damage.	Hinz B, et al. FASEB J, 2008, 22(2), 383-390.	1983	acetaminophen; Paracetamol; 4-Acetamidophenol; 103-90-2; Tylenol; N-(4-Hydroxyphenyl)acetamide; APAP; Panadol; N-Acetyl-p-aminophenol; 4'-Hydroxyacetanilide; Acetaminofen; Datril; p-Hydroxyacetanilide; Algotropyl; Lonarid; Naprinol; p-Acetamidophenol; Doliprane; Injectapap; Acamol; Acenol; Anelix; Multin; p-Acetaminophenol; Abensanil; Acetagesic; Acetalgin; Biocetamol; Clixodyne; Febridol; Febril…	RZVAJINKPMORJF-UHFFFAOYSA-N	CHEMBL112	ACETAMINOPHEN	Others	Others	COX; Endogenous Metabolite; Histone Acetyltransferase; Others; Others	Cyclooxygenase (COX)	COX	https://www.ncbi.nlm.nih.gov/pmc/articles/PMC3249591/	hsa00590 (Arachidonic acid metabolism)	Enzyme	COX	COX
M92241	M	9	50	10	DMSO	132-20-7	T0370	Pheniramine maleate	Inhiston; Trimetose; Daneral	CN(C)CCC(c1ccccc1)c1ccccn1.C(=C\C(=O)O)\C(=O)O	C16H20N2Â·C4H4O4	356.42	GPCR/G Protein; Immunology/Inflammation; Neuroscience	5-HT Receptor; Histamine Receptor	Histamine Receptor; HT	Pheniramine Maleate, an alkylamine derivative with antihistaminic and vasodilatory properties, binds to histamine H1 receptors, thereby inhibiting phospholipase A2 and production of the endothelium-derived relaxing factor, nitric oxide.	Moharana AK, et al. Indian J Physiol Pharmacol. 2000, 44(2), 153-160.	5282139	PHENIRAMINE MALEATE; 132-20-7; Inhiston; Trimetose; Daneral; Naphcon a; Pheniramine hydrogen maleate; Prophenpyridamine maleate; Antolozine; Fervex; Avil-retard; Pheniramine maleate salt; Pheniramine (Maleate); PM 241; CCRIS 6265; EINECS 205-051-4; Pheniramine maleate [USAN]; 1-Phenyl-1-(2-pyridyl)-3-dimethylaminopropane maleate; NSC-757270; UNII-NYW905655B; HO 11513; NYW905655B; PM-241; 2-(alpha…	SSOXZAQUVINQSA-BTJKTKAUSA-N	CHEMBL1653	PHENIRAMINE MALEATE	Others	Others	5-HT Receptor; Histamine Receptor; Others; Others	Histamine Receptor	HR	https://www.ncbi.nlm.nih.gov/pmc/articles/PMC3444973/	hsa04080	Receptor	Histamine_Receptor	5-HT Receptor
M92241	M	10	50	10	DMSO	97-23-4	T0066	Dichlorophen	DDM; Dichlorophene	Oc1c(Cc2c(O)ccc(Cl)c2)cc(Cl)cc1	C13H10Cl2O2	269.13	Microbiology/virology	Antibacterial; Antifungal; Parasite	Bacterial; Fungal; Parasite	DichlorophenÂ is a nontoxic laxative vermicide of chlorinated phenol compound.Â DichlorophenÂ is used as a veterinary fungicide, anthelmintic, and anti-protozoan, as well as an ingredient in antimicrobial soaps and shampoos. This agent probably acts by increasing the clearing of intestinal contents, thereby eradicating tapeworm infections from the intestines.	Langrand J, et al. Clin Toxicol (Phila). 2013 Mar;51(3):178-81.	3037	Dichlorophen; dichlorophene; 97-23-4; 2,2'-Methylenebis(4-chlorophenol); Didroxane; Anthiphen; Dichlorofen; Dichlorphen; Parabis; Dicestal; Didroxan; Trivex; Antiphen; Cordocel; Difentan; Embephen; Panacide; Prevental; Taeniatol; Teniathane; Teniatol; Teniotol; Vermithana; Antifen; Halenol; Hyosan; Korium; Palacel; Dichlorophen B; Dichlorophene 10; Dichloorfeen; Gingivit; Wespuril; Gefir; Fungici…	MDNWOSOZYLHTCG-UHFFFAOYSA-N	CHEMBL33845	DICHLOROPHEN	Others	Others	Antibacterial; Antifungal; Parasite; Others; Others						Antibacterial	Antibacterial
M92241	M	11	50	10	DMSO	53-86-1	T0458	Indometacin	Indomethacin; Indocin; Indometacine; Indomethacine	COc1cc2c(cc1)n(C(=O)c1ccc(Cl)cc1)c(C)c2CC(=O)O	C19H16ClNO4	357.79	Autophagy; Immunology/Inflammation; Metabolism; Neuroscience	Autophagy; COX; PDE; Phospholipase	COX-1; COX-2; PDE2; PLA2; COX; Autophagy	Indomethacin is a Nonsteroidal Anti-inflammatory Drug. The mechanism of action of indomethacin is as a Cyclooxygenase Inhibitor.	Dihlmann S, et al. Oncogene, 2001, 20(5), 645-653.	3715	indomethacin; 53-86-1; indometacin; Indocin; Indomethacine; Indometacine; Indocid; Metindol; Reumacide; Indomethazine; Imbrilon; Tannex; Amuno; Artrinovo; Confortid; Idomethine; Indomecol; Indomethacinum; Metartril; Methazine; Mikametan; Artracin; Artrivia; Dolovin; Indacin; Indomed; Indomee; Indoptic; Indoptol; Inflazon; Infrocin; Metacen; Sadoreum; Inacid; Lausit; Indo-rectolmin; Indo-tablinen;…	CGIGDMFJXJATDK-UHFFFAOYSA-N	CHEMBL6	INDOMETHACIN	Others	Others	Autophagy; COX; PDE; Phospholipase; Others; Others	Cyclooxygenase	COX	https://pubmed.ncbi.nlm.nih.gov/12016557/	hsa00590 (Arachidonic acid metabolism)	enzyme	COX	Autophagy
M92241	M	12	50	10	DMSO	64887-14-5	T0088	Urapidil hydrochloride	Urapidil HCl	Cl.COC1=CC=CC=C1N1CCN(CCCNC2=CC(=O)N(C)C(=O)N2C)CC1	C20H29N5O3Â·HCl	423.94	GPCR/G Protein; Neuroscience	5-HT Receptor; Adrenergic Receptor	5-HT Receptor; Adrenergic Receptor; 5-HT; Î±-adrenergic receptor	Urapidil hydrochloride is 5-HT1A receptor agonist and an Î±1-adrenoceptor antagonist.	Luchini L, et al. Minerva Anestesiol. 1991 Sep;57(9):702-3.	167980	Urapidil hydrochloride; Urapidil HCl; 64887-14-5; Urapidil (hydrochloride); UNII-PVU92PZO12; PVU92PZO12; DTXSID2045812; NCGC00094502-01; Ebrantil (TN); 6-[3-[4-(2-methoxyphenyl)piperazin-1-yl]propylamino]-1,3-dimethylpyrimidine-2,4-dione;hydrochloride; DTXCID0025812; 6-((3-(4-(2-methoxyphenyl)piperazin-1-yl)propyl)amino)-1,3-dimethylpyrimidine-2,4(1H,3H)-dione hydrochloride; 6-[[3-[4-(2-methoxyph…	KTMLZVUAXJERAT-UHFFFAOYSA-N	CHEMBL1256716	URAPIDIL HYDROCHLORIDE	Others	Others	5-HT Receptor; Adrenergic Receptor; Others; Others	Adrenergic Receptor	ADR	https://pubmed.ncbi.nlm.nih.gov/6140998/	hsa04080	G protein-coupled receptor	Adrenergic_Receptor	5-HT Receptor
M92241	M	13	50	10	DMSO	3416-24-8	T0429	Glucosamine	Chitosamine; D-Glucosamine	N[C@H]1C(O)O[C@H](CO)[C@@H](O)[C@@H]1O	C6H13NO5	179.17	Apoptosis; Autophagy; Chromatin/Epigenetic; Immunology/Inflammation; Membrane transporter/Ion channel; Metabolism; NF-ÎºB; Proteases/Proteasome	Autophagy; CFTR; Endogenous Metabolite; HIF/HIF Prolyl-Hydroxylase; MMP; NF-ÎºB; ROS; TNF	Chitosanase; MMP-9; NF-ÎºB; IFÎ³; TNF-Î±; Endogenous Metabolite; Reactive Oxygen Species; HIF/HIF Prolyl-Hydroxylase; Autophagy	Glucosamine is an amino sugar and a prominent precursor in the biochemical synthesis of glycosylated proteins and lipids. Supplemental glucosamine may help to rebuild cartilage and treat arthritis.	Fenton JI, et al. Equine Vet J Suppl. 2002 Sep;(34):219-23.	439213	2-Amino-2-Deoxy-D-Glucopyranose; 2-Amino-2-Deoxy-D-Glucopyranoside; 2-Amino-2-Deoxy-D-Glucose; 2-Amino-2-Deoxy-Glucopyranose; 2-Amino-2-Deoxy-Glucopyranoside; 2-Amino-2-Deoxy-Glucose; 2-Deoxy-2-Amino-D-Glucopyranose; 2-Deoxy-2-Amino-D-Glucopyranoside; 2-Deoxy-2-Amino-D-Glucose; 2-Deoxy-2-Amino-Glucopyranose; 2-Deoxy-2-Amino-Glucopyranoside; 2-Deoxy-2-Amino-Glucose; D-GlcN; D-Glucosamine; GlcN; Gl…	MSWZFWKMSRAUBD-IVMDWMLBSA-N	CHEMBL493287	GLUCOSAMINE	Others	Others	Autophagy; CFTR; Endogenous Metabolite; HIF/HIF Prolyl-Hydroxylase; MMP; NF-ÎºB; ROS; TNF; Others; Others	Endogenous Metabolite		https://www.ncbi.nlm.nih.gov/pmc/articles/PMC3726848/	hsa00520	Metabolite	Metabolite	Autophagy
M92241	M	14	50	10	DMSO	83881-52-1	T0089	Cetirizine dihydrochloride	P071; Cetirizine DiHCl; UCB P071	Cl.Cl.OC(=O)COCCN1CCN(CC1)C(c1ccccc1)c1ccc(Cl)cc1	C21H27Cl3N2O3	461.81	GPCR/G Protein; Immunology/Inflammation; Neuroscience	Histamine Receptor	H1 receptor; Histamine Receptor	Cetirizine dihydrochloride is an effective second-generation histamine H1 antagonist that is potent in the therapy of allergic rhinitis, confirmed urticaria, and pollen-induced asthma. Unlike other conventional antihistamines, it does not cause side effects of drowsiness or anticholinergic.	Christophe B, et al. Eur J Pharmacol. 2003 May 30;470(1-2):87-94.	55182	Cetirizine dihydrochloride; 83881-52-1; CETIRIZINE HYDROCHLORIDE; Zyrtec; Reactine; Cetirizine diHCl; Cetrine; Alerlisin; Cetirizine HCl; 2-(2-(4-((4-Chlorophenyl)(phenyl)methyl)piperazin-1-yl)ethoxy)acetic acid dihydrochloride; Alertisin; Cetalerg; Ceterifug; Cetidura; Cetirigamma; Cetirlan; Cetriler; Formistin; Ressital; Salvalerg; Stopaler; Alercet; Alergex; Alerid; Cetzine; Riztec; Setiral; V…	PGLIUCLTXOYQMV-UHFFFAOYSA-N	CHEMBL1607273	CETIRIZINE HYDROCHLORIDE	Others	Others	Histamine Receptor; Others; Others	Histamine H1 receptor	HRH1	https://www.ncbi.nlm.nih.gov/pmc/articles/PMC3736829/	hsa04080	G protein-coupled receptor	Histamine_Receptor	Histamine Receptor
M92241	M	15	50	10	DMSO	299-28-5	T0411	Calcium gluconate	Gluconic acid hemicalcium salt; Calcium D-gluconate; Gluconate Calcium	[Ca+2].C(=O)([C@H](O)[C@@H](O)[C@H](O)[C@H](O)CO)[O-].C(=O)([C@H](O)[C@@H](O)[C@H](O)[C@H](O)CO)[O-]	C12H22CaO14	430.37	Others	Others	Others	Calcium gluconate is the calcium salt of gluconic acid, used as a calcium replenisher in hypocalcemic states.	Drop LJ, Cullen DJ. Br J Anaesth. 1980 May;52(5):501-5.	9290	CALCIUM GLUCONATE; 299-28-5; Calcium D-gluconate; Calglucon; Glucobiogen; Calciofon; Ebucin; D-Gluconic acid, calcium salt (2:1); Calcicol; Calcipur; Calglucol; Dragocal; Kalpren; Novocal; Calcarea gluconica; Calcium di-gluconate; Gluconate de calcium; Calcium hexagluconate; Calcet; Calcium gluconate anhydrous; Gluconato di calcio; Gluconic Acid Calcium Salt; Calcium gluconate, anhydrous; Glucona…	NEEHYRZPVYRGPP-IYEMJOQQSA-L	CHEMBL2106119	CALCIUM GLUCONATE	Others	Others	Others; Others; Others						Others	Others
M92241	M	16	50	10	DMSO	81403-68-1	T0091	Alfuzosin hydrochloride	SL 77499-10; Alfuzosin HCl	Cl.COc1c(OC)cc2c(N)nc(nc2c1)N(C)CCCNC(=O)C1CCCO1	C19H27N5O4Â·HCl	425.91	GPCR/G Protein; Neuroscience	Adrenergic Receptor	Adrenergic Receptor; Î±-adrenergic receptor	Alfuzosin hydrochloride is anÂ Î±1 adrenergic receptorÂ antagonist. It applies to treat benign prostatic hyperplasia (BPH).	Lacerda AE, et al. J Pharmacol Exp Ther,2008, 324(2), 427-433.	71764	Alfuzosin Hydrochloride; 81403-68-1; Alfuzosin HCl; Uroxatral; Urion; Xatral; Alfoten; Alfetim; Alfuzosin (hydrochloride); Alfuzosin hydrochloride [USAN]; SL 77 499-10; Xatral Retard; Xatral OD; Xatral SR; Xatral XL; Uroxatral (TN); SL 77499-10; ALFUZOSINHYDROCHLORIDE; UNII-75046A1XTN; DTXSID3045514; SL-77499-10; 75046A1XTN; Alfuzosin hydrochloride (Uroxatral); Alfuzosin hydrochloride (JAN/USAN);…	YTNKWDJILNVLGX-UHFFFAOYSA-N	CHEMBL1723	ALFUZOSIN HYDROCHLORIDE	Others	Others	Adrenergic Receptor; Others; Others	Alpha-1 adrenergic receptor	ADRA1	https://www.ncbi.nlm.nih.gov/pmc/articles/PMC2871873/	hsa04080	G protein-coupled receptor	Adrenergic_Receptor	Adrenergic Receptor
M92241	M	17	50	10	DMSO	5987-82-6	T0378	Oxybuprocaine hydrochloride	Oxybuprocaine HCl	CCCCOc1c(N)ccc(c1)C(=O)OCCN(CC)CC.Cl	C17H29ClN2O3	344.88	Membrane transporter/Ion channel	Sodium Channel	Sodium Channel	Oxybuprocaine hydrochloride, a local anesthetic, is used especially in otolaryngology and ophthalmology.	Hung CH, et al. Neurosci Lett, 2009, 454(3), 249-253.	6420040	Benoxinate hydrochloride; 5987-82-6; oxybuprocaine hydrochloride; 2-(Diethylamino)ethyl 4-amino-3-butoxybenzoate hydrochloride; Oxybuprocaine HCL; Benoxinate HCL; Cebesine; Dorsacaine; Minims Benoxinate; Opulets Benoxinate; Conjuncain; Oxbarukain; Lacrimin; Novesin; Novesina; Novesine; Dorsacaine hydrochloride; NSC-759847; UNII-0VE4U49K15; Benoxinate hydrochloride [USP]; DTXSID4045393; 0VE4U49K15…	PRGUDWLMFLCODA-UHFFFAOYSA-N	CHEMBL1200654	BENOXINATE HYDROCHLORIDE	Others	Others	Sodium Channel; Others; Others	Sodium Channel	SCN	PubChem Compound Summary for CID 657313, Oxybuprocaine. Retrieved September 21, 2023, from https://pubchem.ncbi.nlm.nih.gov/compound/Oxybuprocaine	hsa04725	Ion channel	Sodium_Channel	Sodium Channel
M92241	M	18	50	10	DMSO	2508-72-7	T0092	Antazoline hydrochloride	Phenazoline hydrochloride; Antazoline HCl; Phenazocine HCl	Cl.C(N(Cc1ccccc1)c1ccccc1)C1=NCCN1	C17H19N3Â·HCl	301.82	GPCR/G Protein; Immunology/Inflammation; Neuroscience	Histamine Receptor	H1 receptor; Histamine Receptor	Antazoline hydrochloride, a first-generation antihistamine, can bind to the histamine H1 receptor and block the action of endogenous histamine.	Milhaud D, et al. Neuroscience, 2003, 120(2), 475-484.	17275	Antazoline hydrochloride; 2508-72-7; Antazoline HCl; Fenazolina; Histazine; Phenazoline hydrochloride; Antazoline (hydrochloride); 2-(N-Benzylanilinomethyl)-2-imidazoline hydrochloride; Antazolinium chloratum; Antistine hydrochloride; EINECS 219-719-8; UNII-FP8Q8F72JH; N-benzyl-N-(4,5-dihydro-1H-imidazol-2-ylmethyl)aniline hydrochloride; FP8Q8F72JH; MLS000028599; Antazoline hydrochloride [USP]; D…	SWKDMSRRIBZZAY-UHFFFAOYSA-N	CHEMBL1256819	ANTAZOLINE HYDROCHLORIDE	Others	Others	Histamine Receptor; Others; Others	Histamine H1 receptor	HRH1	https://pubchem.ncbi.nlm.nih.gov/compound/Antazoline-hydrochloride#section=Pharmacology-and-Biochemistry	hsa04080	G protein-coupled receptor	Histamine_Receptor	Histamine Receptor
M92241	M	19	50	10	DMSO	33342-05-1	T0371	Gliquidone	AR-DF 26; Glurenorm	COc1cc2c(cc1)C(C)(C)C(=O)N(CCc1ccc(cc1)S(=O)(=O)NC(=O)NC1CCCCC1)C2=O	C27H33N3O6S	527.63	Membrane transporter/Ion channel	Potassium Channel	Potassium Channel	Gliquidone is a potent, second-generation sulfonylurea with antihyperglycemic activity. Like other second-generation compounds, gliquidone exerts greater binding affinity to SUR1 and increased potency compared to first-generation compounds. In addition, this agent exerts peroxisome proliferator-activated receptor (PPAR) gamma agonistic activity.	Angel I, et al. Fundam Clin Pharmacol, 1991, 5(2), 107-115.	91610	Gliquidone; 33342-05-1; Glurenorm; Beglynor; Gliquidonum; ARDF 26; glikvidon; glycvidon; Beglynora; Gliquidona; Gliquidonum [INN-Latin]; Gliquidona [INN-Spanish]; ARDF 26 SE; AR-DF 26; Gliquidone [BAN:INN]; C27H33N3O6S; Glurenorm (TN); Gliquidone (INN); ARDF-26; Gliquidone sodium; Gliquidone [INN:BAN]; 1-cyclohexyl-3-[4-[2-(7-methoxy-4,4-dimethyl-1,3-dioxoisoquinolin-2-yl)ethyl]phenyl]sulfonylure…	LLJFMFZYVVLQKT-UHFFFAOYSA-N	CHEMBL383634	GLIQUIDONE	Others	Others	Potassium Channel; Others; Others	ATP-sensitive potassium channel	K_ATP	https://www.ncbi.nlm.nih.gov/pmc/articles/PMC1474872/	hsa05032	Ion channel	Potassium_Channel	Potassium Channel
M92241	M	20	50	10	DMSO	51333-22-3	T0094	Budesonide	Pulmicort; Rhinocort; Entocort	CCCC1O[C@@H]2C[C@H]3[C@@H]4CCC5=CC(=O)C=C[C@]5(C)[C@H]4[C@@H](O)C[C@]3(C)[C@@]2(O1)C(=O)CO	C25H34O6	430.54	Endocrinology/Hormones	Glucocorticoid Receptor	Glucocorticoid Receptor	Budesonide, an anti-inflammatory corticosteroid, has shown the effective glucocorticoid activitie and few mineralocorticoid activities. According to reports, Budesonide has extensively inhibitory effects against multiple cells types and mediators referred to allergic and nonallergic-mediated inflammatory. What's more, the anti-inflammatory action of budesonide has been revealed to contribute to t…	Stellato C, et al. J Immunol,1999, 163(10), 5624-5632.	5281004	budesonide; Pulmicort; Entocort; Rhinocort; 51333-22-3; Preferid; Budeson; Rhinocort Aqua; Entocort EC; Cortivent; Micronyl; Respules; Spirocort; Bidien; Uceris; Pulmicort Respules; Budesonidum; Rhinocort alpha; Pulmicort Flexhaler; Budesonido; Budecort Inhaler; Budenofalk; Horacort; Fvolir; Rhinocort Allergy; Budesonidum [INN-Latin]; Budesonido [INN-Spanish]; Pulmicort turbuhaler; S-1320; MAP-00…	VOVIALXJUBGFJZ-KWVAZRHASA-N	CHEMBL1370	BUDESONIDE	Others	Others	Glucocorticoid Receptor; Others; Others	Glucocorticoid Receptor	GR	https://pubchem.ncbi.nlm.nih.gov/compound/Budesonide#section=Pharmacology-and-Biochemistry	hsa04145	Receptor	Glucocorticoid_Receptor	Glucocorticoid Receptor
M92241	M	21	50	10	DMSO	38194-50-2	T0459	Sulindac	MK-231; Clinoril; Arthrocine; Sulindac sulfoxide	CC1=C(CC(O)=O)c2cc(F)ccc2C\1=C/c1ccc(cc1)S(C)=O	C20H17FO3S	356.41	Autophagy; Immunology/Inflammation; Neuroscience	Autophagy; COX	Autophagy; COX	Sulindac is a sulfinylindene derivative prodrug with potential antineoplastic activity. Converted in vivo to an active metabolite, sulindac, a nonsteroidal anti-inflammatory drug (NSAID), blocks cyclic guanosine monophosphate-phosphodiesterase (cGMP-PDE), an enzyme that inhibits the normal apoptosis signal pathway; this inhibition permits the apoptotic signal pathway to proceed unopposed, resulti…	Yamamoto Y, et al. J Biol Chem,1999, 274(38), 27307-27314.	5352	38194-50-2; Sulindac sulfoxide; 32004-68-5; 2-[6-fluoro-2-methyl-3-[(4-methylsulfinylphenyl)methylidene]-1-indenyl]acetic acid; 2-[6-fluoro-2-methyl-3-[(4-methylsulfinylphenyl)methylidene]inden-1-yl]acetic acid; Algocetil; Citireuma; Clisundac; Imbaral; Reumofil; Sulinol; Sudac; Sulindac, trans-(S)-; Sulindac [USAN:INN:BAN:JAN]; C20-H17-F-O3-S; Sulindac,(S); 61812-46-2; 9000-14-0; Spectrum_001026…	MLKXDPUZXIRXEP-UHFFFAOYSA-N	CHEMBL3186192		Others	Others	Autophagy; COX; Others; Others	Cyclooxygenase	COX	https://www.ncbi.nlm.nih.gov/pmc/articles/PMC1855331/	hsa00590 (Arachidonic acid metabolism)	Enzyme	COX	Autophagy
M92241	M	22	50	10	DMSO	66985-17-9	T0098	Ipratropium bromide monohydrate	Ipratropium bromide hydrate	O.[Br-].CC(C)[N+]1(C)[C@H]2CC[C@@H]1C[C@@H](C2)OC(=O)C(CO)c1ccccc1	C20H32BrNO4	430.38	Neuroscience	AChR	mAChR	Ipratropium bromide is a muscarinic antagonist structurally related to ATROPINE but often considered safer and more effective for inhalation use. It is used for various bronchial disorders, in rhinitis, and as an antiarrhythmic.	Wellington K. Treat Respir Med. 2005; 4(3):215-20; discussion 221-2.	16738693	Ipratropium bromide hydrate; Ipratropium bromide monohydrate; 66985-17-9; DTXSID3045772; Atrovent; 8-Azoniabicyclo[3.2.1]octane,3-(3-hydroxy-1-oxo-2-phenylpropoxy)-8-methyl-8-(1-methylethyl)-, bromide,hydrate (1:1:1), (3-endo,8-syn)-; NCGC00022819-03; ATEM; Sch 1000-Br-monohydrate; DTXCID20809613; Ipratropiumbromid [German]; Ipratropium bromide anhydrous; Ipratropii bromidum [INN-Latin]; [(1R,5S)…	KEWHKYJURDBRMN-XFQAGIBXSA-M	CHEMBL1711202		Others	Others	AChR; Others; Others	Muscarinic acetylcholine receptor	mAChR	https://www.ncbi.nlm.nih.gov/pmc/articles/PMC2643469/	hsa04080	G protein-coupled receptor	AChR	AChR
M92241	N	3	50	10	DMSO	17321-77-6	T0255	Clomipramine hydrochloride	Clomipramine HCl; Anafranil	Cl.CN(C)CCCN1c2ccccc2CCc2c1cc(Cl)cc2	C19H23ClN2Â·HCl	351.31	GPCR/G Protein; Neuroscience; oxidation-reduction	5-HT Receptor; Dopamine Receptor; GST; Norepinephrine; Serotonin Transporter	5-HT; Sert (Sodium-dependent); GSTP; Noradrenaline transporter (Sodium-dependent); dopamine transporter (DAT); Serotonin Transporter; Dopamine Receptor	Clomipramine hydrochloride is a tricyclic antidepressant similar to IMIPRAMINE that selectively inhibits the uptake of serotonin in the brain. It is readily absorbed from the gastrointestinal tract and demethylated in the liver to form its primary active metabolite, desmethylclomipramine.	McTavish, D. and P. Benfield, Clomipramine. An overview of its pharmacological properties and a review of its therapeutic use in obsessive compulsive disorder and panic disorder. Drugs, 1990. 39(1): p. 136-53.	68539	Clomipramine hydrochloride; 17321-77-6; Clomipramine HCL; Anafranil; 3-(3-chloro-10,11-dihydro-5H-dibenzo[b,f]azepin-5-yl)-N,N-dimethylpropan-1-amine hydrochloride; Anaphranil; Chlorimipramine hydrochloride; 3-Chloroimipramine hydrochloride; Chloroimipramine monohydrochloride; Clomipramine (hydrochloride); Clomipramine Monohydrochloride; EINECS 241-344-3; UNII-2LXW0L6GWJ; 2LXW0L6GWJ; NSC-759323; …	WIMWMKZEIBHDTH-UHFFFAOYSA-N	CHEMBL1200710	CLOMIPRAMINE HYDROCHLORIDE	Others	Others	5-HT Receptor; Dopamine Receptor; GST; Norepinephrine; Serotonin Transporter; Others; Others	Serotonin Transporter	SERT	https://pubchem.ncbi.nlm.nih.gov/compound/Clomipramine-hydrochloride#section=Pharmacology-and-Biochemistry	hsa04726	Transporter	Serotonin	5-HT Receptor
M92241	N	4	50	10	DMSO	456-59-7	T0504	Cyclandelate	3,5,5-Trimethylcyclohexyl mandelate; BS 572	CC1CC(CC(C)(C)C1)OC(=O)C(O)c1ccccc1	C17H24O3	276.38	Others	ACAT	ACAT	Cyclandelate, a direct-acting smooth muscle relaxant, is used to dilate blood vessels.	Middleton B, et al. Drugs, 1987, 33 Suppl 2:75-9.	2893	cyclandelate; 456-59-7; Cyclomandol; Cyclolyt; Cyclospasmol; Perebral; Ciclospasmol; Cyclergine; Spasmocyclon; Spasmocyclone; Capilan; Clandilon; Dilatan; Saiclate; Sancyclan; Sepyron; Spasmione; Arto-espasmol; 3,3,5-Trimethylcyclohexyl mandelate; 3,5,5-Trimethylcyclohexyl mandelate; Ciclandelato; Cyclobral; Novodil; Natil; 3,5,5-Trimethylcyclohexyl amygdalate; Cyclandelatum; Cyclandelatum [INN-L…	WZHCOOQXZCIUNC-UHFFFAOYSA-N	CHEMBL1480987	CYCLANDELATE	Others	Others	ACAT; Others; Others						ACAT	ACAT
M92241	N	5	50	10	DMSO	6968-72-5	T0257	Mepiroxol	Lysateril; Mepyroxol	OCc1c[n+]([O-])ccc1	C6H7NO2	125.13	Others	Others	Others	Mepiroxol, an antihyperlipidemic, is also called 3-PYRIDINEMETHANOL N-OXIDE.	Robert A, et al. Dig Dis Sci. 1987 Sep;32(9):997-1003.	71668	Mepiroxol; 6968-72-5; 3-Pyridinemethanol N-oxide; 3-Pyridylcarbinol N-oxide; Lysateril; Mepyroxol; 3-Pyridinemethanol 1-oxide; 3-(Hydroxymethyl)pyridine 1-oxide; Mepiroxolum; Mepiroxol [INN:DCF]; 3-(Hydroxymethyl)pyridine N-oxide; Mepiroxolum [INN-Latin]; NSC-66283; Pyridine-3-methanol N-oxide; 3-Pyridinemethanol, 1-oxide; UNII-BR2Z22465M; DTXSID0046569; BR2Z22465M; EINECS 230-187-6; NSC 66283; N…	LQYJAVWWKTWWKN-UHFFFAOYSA-N	CHEMBL1985503	MEPIROXOL	Others	Others	Others; Others; Others						Others	Others
M92241	N	6	50	10	DMSO	23593-75-1	T0506	Clotrimazole	BAY b 5097; FB 5097	Clc1ccccc1C(n1ccnc1)(c1ccccc1)c1ccccc1	C22H17ClN2	344.84	Autophagy; Microbiology/virology	Anti-infection; Antibacterial; Antibiotic; Antifungal; Autophagy	14-Î± Demethylase; Fungal; Bacterial; Autophagy; Antibiotic	Clotrimazole, an imidazole derivative with a broad spectrum of antimycotic activity, inhibits biosynthesis of the sterol ergostol.	Aktas H, et al. Proc Natl Acad Sci U S A,1998, 95(14), 8280-8285.	2812	clotrimazole; 23593-75-1; Lotrimin; Canesten; Mycelex; Mycosporin; Clotrimazol; Empecid; Mykosporin; Gyne lotrimin; Chlotrimazole; Trimysten; Gyne-Lotrimin; Mycelex G; 1-(o-Chlorotrityl)imidazole; Rimazole; Gynix; Mono-baycuten; Mycelex Troches; Pedisafe; Mycelex 7; Tibatin; Lotrimin AF Cream; Lotrimin Af; Trivagizole 3; Desamix F; Mycelex-G; Mycelex OTC; Clotrimazolum; Gyne-Lotrimin 3; Canestine…	VNFPBHJOKIVQEB-UHFFFAOYSA-N	CHEMBL104	CLOTRIMAZOLE	Others	Others	Anti-infection; Antibacterial; Antibiotic; Antifungal; Autophagy; Others; Others	lanosterol 14Î±-demethylase	CYP51	Vanden Bossche, H.; Marichal, P.; Odds, F.C. (1994). "Molecular mechanisms of drug resistance in fungi." Trends in Microbiology. 2 (10): 393â€“400.	map00100	Enzyme	Lanosterol_Demethylase	Anti-infection
M92241	N	7	50	10	DMSO	2037-95-8	T0258	Carsalame	2H-1,3-Benzoxazine-2,4(3H)-dione; Carbonylsalicylamide; Carsalam	O=c1[nH]c(=O)c2ccccc2o1	C8H5NO3	163.13	Microbiology/virology	Antibiotic	Antibiotic	Carsalam is a nonsteroidal anti-inflammatory drug.	Kamal A. Biochem Pharmacol. 1990 Oct 1;40(7):1669-71.	16258	Carsalam; 2037-95-8; 2H-Benzo[e][1,3]oxazine-2,4(3H)-dione; 2H-1,3-BENZOXAZINE-2,4(3H)-DIONE; 1,3-Benzoxazine-2,4-dione; Beaprine; Ruhmal; Oxophenhydroxazine; Oxobenzhydroxazin; Oxophenhydroxazin; carbonylsalicylamide; Carsalamum; Carsalamo; Carsalamum [INN-Latin]; Carsalamo [INN-Spanish]; Carsalam [INN:BAN:DCF]; 3,4-dihydro-2H-1,3-benzoxazine-2,4-dione; NSC 36166; NSC-36166; 4H-1,3-Benzoxazine-2…	OAYRYNVEFFWSHK-UHFFFAOYSA-N	CHEMBL1720051	CARSALAM	Others	Others	Antibiotic; Others; Others						Antibiotic	Antibiotic
M92241	N	8	50	10	DMSO	130-16-5	T0509	Dermofongin	Dermofungin; 5-Chloro-8-quinolinol; Cloxiquine	Oc1c2ncccc2c(Cl)cc1	C9H6ClNO	179.6	DNA Damage/DNA Repair; Metabolism; Microbiology/virology	Antibacterial; Antibiotic; Antifungal; Parasite; PPAR	Antibiotic; Bacterial; Fungal; Parasite; PPAR	Cloxyquin is a monohalogenated 8-hydroxyquinoline with activity against bacteria, fungi, and protozoa.	LatosiÅ„ska JN, et al. J Mol Model. 2011 Jul;17(7):1781-800.	2817	5-CHLORO-8-HYDROXYQUINOLINE; 130-16-5; 5-Chloroquinolin-8-ol; Cloxiquine; cloxyquin; 5-Chloro-8-quinolinol; 8-Quinolinol, 5-chloro-; Dermofongin; 5-Chlorooxine; Chlorisept; Dermofungin; 5-Chloro-8-oxyquinoline; Chloroxychinolin; Dermofongin A; 8-Hydroxy-5-chloroquinoline; Monochlorohydroxyquinoline; Cloxyquin [USAN]; Cloxiquina; 5-Chlor-8-chinolinol; Cloxiquinum; 5-Chloro-quinolin-8-ol; 5-chloran…	CTQMJYWDVABFRZ-UHFFFAOYSA-N	CHEMBL225164	CLOXYQUIN	Others	Others	Antibacterial; Antibiotic; Antifungal; Parasite; PPAR; Others; Others						Antibacterial	Antibacterial
M92241	N	9	50	10	DMSO	4940-39-0	T0259	Chromocarbe	Chromocarb; Chromone-2-carboxylic acid	OC(=O)c1cc(=O)c2ccccc2o1	C10H6O4	190.15	Others	Others	Others	Chromocarb is a vascular protective agent used to treat venous disorders and microvascular affections.	Godeau G, et al. Clin Physiol Biochem, 1987, 5(1), 15-26.	2741	chromocarb; 4940-39-0; Chromone-2-carboxylic acid; 4-Oxo-4H-1-benzopyran-2-carboxylic acid; 4-Oxo-4H-chromene-2-carboxylic acid; Atremon; 4-Oxochromene-2-carboxylic acid; Chromocarbe; Chromonecarboxylic acid; LP-1; 4H-1-BENZOPYRAN-2-CARBOXYLIC ACID, 4-OXO-; Chromocarbum; Cromocarbo; Chromocarb [INN:DCF]; 2-Chromonecarboxylic Acid; Chromocarbe [INN-French]; Chromocarbum [INN-Latin]; Cromocarbo [IN…	RVMGXWBCQGAWBR-UHFFFAOYSA-N	CHEMBL83628	CHROMOCARB	Others	Others	Others; Others; Others						Others	Others
M92241	N	10	50	10	DMSO	57-67-0	T0510	Sulfaguanidine	Guanicil; Sulfaguine	NC(=NS(=O)(=O)c1ccc(N)cc1)N	C7H10N4O2S	214.25	Autophagy; Microbiology/virology	Antibacterial; Antibiotic; Autophagy	Bacterial; Antibiotic; DHPS	Sulfaguanidine, a sulfonamide, is served as an anti-infective agent.	Mizuno N, et al. J Pharmacobiodyn. 1986, 9(10), 787-792.	5324	sulfaguanidine; 57-67-0; Sulphaguanidine; Sulfaguanidin; Sulfaguine; Guanicil; Sulfanilylguanidine; Sulfanilguanidine; Sulfoguanidine; Sulfaguanil; Sulfoguanil; Sulfoguanyl; Abiguanil; Guanidan; Sulfentidine; Aterian; Ganidan; Guamide; Orgaguanidon; Sulfaguanidinum; Sulfoguenil; Sulfoquanidine; N1-Amidinosulfanilamide; Resulfon; Suganyl; Diacta; Ruocid; Sulgin; N-Guanylsulfanilamide; S-Guanidine;…	BRBKOPJOKNSWSG-UHFFFAOYSA-N	CHEMBL338802	SULFAGUANIDINE	Others	Others	Antibacterial; Antibiotic; Autophagy; Others; Others	Dihydropteroate synthase	DHPS	https://www.ncbi.nlm.nih.gov/pmc/articles/PMC1479132/	hsa00790	Enzyme	Dihydropteroate_Synthase	Antibacterial
M92241	N	11	50	10	DMSO	64092-48-4	T0264	Zomepirac Sodium	McN-2783-21-98; Zomepirac sodium salt	[Na+].Cn1c(CC(=O)[O-])cc(C)c1C(=O)c1ccc(Cl)cc1	C15H13ClNNaO3	313.71	Immunology/Inflammation; Metabolism	PDE; PGE Synthase	PDE2; PGE synthase	Zomepirac sodium salt is a prostaglandin synthetase inhibitor.	Hata AN, et al. Mol Pharmacol. 2005 Mar;67(3):640-7.	16220118	Zomepirac sodium salt; ZOMEPIRAC SODIUM; 64092-48-4; Sodium zomepirac; Zomepirac (sodium salt); Zomepirac sodium anhydrous; McN 2783-21-98; EINECS 264-669-2; UNII-DA5B6IWF46; DA5B6IWF46; DTXSID3033989; sodium;2-[5-(4-chlorobenzoyl)-1,4-dimethylpyrrol-2-yl]acetate; 5-(4-Chlorobenzoyl)-1,4-dimethyl-1H-pyrrole-2-acetic acid sodium salt; McN-2783-21-98; 1H-Pyrrole-2-acetic acid, 5-(4-chlorobenzoyl)-1…	SEEXPXUCHVGZGU-UHFFFAOYSA-M	CHEMBL266459	ZOMEPIRAC SODIUM	Others	Others	PDE; PGE Synthase; Others; Others	Cyclooxygenase-1 (COX-1)	COX-1	https://www.ncbi.nlm.nih.gov/pmc/articles/PMC1884328/	hsa00590 (Arachidonic acid metabolism)	Enzyme	COX	PDE
M92241	N	12	50	10	DMSO	3644-61-9	T0511	Tolperisone hydrochloride	Tolperisone HCl; Midocalm; Muscalm	Cl.CC(CN1CCCCC1)C(=O)c1ccc(C)cc1	C16H24ClNO	281.82	Membrane transporter/Ion channel	Sodium Channel	Sodium Channel	Tolperisone hydrochloride, a centrally acting muscle relaxant, is used in the therapy of pathologically increased tone of the cross-striated muscle resulted by neurological diseases (damage of the encephalomyelitis, myelopathy, multiple sclerosis, pyramidal tract) and of spastic paralysis and other encephalopathies manifested with muscular dystonia.	Hofer D, et al. Eur J Pharmacol, 2006, 538(1-3), 5-14.	92965	Tolperisone hydrochloride; 3644-61-9; Tolperisone HCl; Midocalm; Muscalm; Tolperisone (hydrochloride); 2,4'-Dimethyl-3-piperidinopropiophenone hydrochloride; 2-methyl-1-(4-methylphenyl)-3-(piperidin-1-yl)propan-1-one hydrochloride; 2-Methyl-3-piperidino-1-p-tolylpropan-1-one hydrochloride; Tolperisone hydrochloride [JAN]; N-553; EINECS 222-876-5; AV 650; UNII-8Z075K2TIG; 2-methyl-1-(4-methylpheny…	ZBUVYROEHQQAKL-UHFFFAOYSA-N	CHEMBL1395150	TOLPERISONE HYDROCHLORIDE	Others	Others	Sodium Channel; Others; Others	Sodium Channels	SCN	https://www.ncbi.nlm.nih.gov/pmc/articles/PMC6486051/	hsa04080	Ion channel	Sodium_Channel	Sodium Channel
M92241	N	13	50	10	DMSO	134-63-4	T0268	Lobeline hydrochloride	L-Lobeline hydrochloride; Î±-Lobeline hydrochloride	CN1[C@@H](CCC[C@@H]1CC(=O)c1ccccc1)C[C@@H](c1ccccc1)O.Cl	C22H27NO2Â·HCl	373.92	Neuroscience	AChR	nAChR; Nicotinic Receptor	Lobeline hydrochloride is a nicotinic receptor agonist, acting as an effective antagonist at both Î±4Î²2 and Î±3Î²2 neuronal nicotinic receptor subtypes.	Meyer AC, et al. J Neurochem. 2013 Oct;127(2):187-98.	101615	LOBELINE HYDROCHLORIDE; Lobeline HCl; 134-63-4; alpha-Lobeline hydrochloride; (-)-Lobeline hydrochloride; L-Lobeline hydrochloride; Lobeline (hydrochloride); Lobeline hydrochloride [JAN]; Zoolobelin; Lobron; MLS000069392; UNII-96J834CB88; Lobelin hydrochloride; 96J834CB88; Lobelini hydrochloridum; Lobelinum hydrochloricum; SMR000058465; Alpha-Lobeline HCl; 2-[(2R,6S)-6-[(2S)-2-hydroxy-2-phenyleth…	MKMYPTLXLWOUSO-NFQNBQCWSA-N	CHEMBL1257005	LOBELINE HYDROCHLORIDE	Others	Others	AChR; Others; Others	Nicotinic acetylcholine receptor	AChR	Miller DK, Crooks PA, Teng L, Witkin JM, Munzar P, Goldberg SR, Acri JB, Dwoskin LP. "Lobeline inhibits the neurochemical and behavioral effects of amphetamine." Journal of Pharmacology and Experimental Therapeutics, 2001 Mar;296(3):1023-34.	hsa04080	Ligand-gated ion channel	AChR	AChR
M92241	N	14	50	10	DMSO	85-73-4	T0512	Phthalylsulfathiazole	N4-Phthalylsulfathiazole; Sulfathalidine	OC(=O)c1ccccc1C(=O)Nc1ccc(cc1)S(=O)(=O)Nc1nccs1	C17H13N3O5S2	403.43	Microbiology/virology	Antibacterial; Antibiotic	Antibiotic; Bacterial	Phthalylsulfathiazole is a broad spectrum antimicrobial agent, used in the treatment of dysentery, colitis, and gastroenteritis.	FLORESTANO HJ, KENNEDY JF. J Lab Clin Med. 1946 Jul;31(7):757-62.	4806	phthalylsulfathiazole; 85-73-4; Sulfathalidine; Phthalylsulphathiazole; Phthalazol; Phthalylsulfonazole; Cremothalidine; Sulphaphthalyl; Phthalazole; Sulfaphthalazole; Phthalylnorsulfazole; Enteramida; Entexidina; Phtalazol; N4-Phthalylsulfathiazole; Intestiazol; Phthalidin; Sulfacetil; Thalistanin; Thalistatyl; Ultratiazol; Ftalazol; Ftalysept; Sulftalyl; Taleudron; Talidine; Taloudron; Thalazol…	PBMSWVPMRUJMPE-UHFFFAOYSA-N	CHEMBL1524273	PHTHALYLSULFATHIAZOLE	Others	Others	Antibacterial; Antibiotic; Others; Others	Antibacterial				Antibiotic	Antibacterial	Antibacterial
M92241	N	15	50	10	DMSO	6385-02-0	T0260	Meclofenamate Sodium	Meclomen; Meclonax; Movens	Cc1ccc(Cl)c(Nc2ccccc2C(=O)[O-])c1Cl.[Na+]	C14H10Cl2NNaO2	318.14	Cytoskeletal Signaling; Immunology/Inflammation; Neuroscience	COX; Gap Junction Protein	COX-1; COX-2; Gap Junction Protein	Meclofenamate Sodium, a non-steroidal anti-inflammatory agent, has properties of antipyretic and antigranulation activities. It also inhibits prostaglandin biosynthesis.	Soriano-HernÃ¡ndez AD, et al. Int Urol Nephrol. 2012 Apr;44(2):471-7.	4038	MECLOFENAMATE SODIUM; 6385-02-0; Meclomen; Meclofenamic acid sodium salt; Meclonax; Movens; Sodium meclofenamate; Meclofenamic acid sodium; Sodium 2-((2,6-dichloro-3-methylphenyl)amino)benzoate; Meclofenamic acid (sodium); MECLODIUM; Sodium meclophenamate; Meclofenamate (sodium); sodium 2-[(2,6-dichloro-3-methylphenyl)amino]benzoate; EINECS 228-983-3; UNII-9MMQ0YER4E; CI 583; 9MMQ0YER4E; 2-[(2,6-…	OGPIIGMUPMPMNT-UHFFFAOYSA-M	CHEMBL876	MECLOFENAMATE SODIUM	Others	Others	COX; Gap Junction Protein; Others; Others	Cyclooxygenase	COX	https://pubchem.ncbi.nlm.nih.gov/compound/Meclofenamate-sodium#section=Pharmacology-and-Biochemistry	hsa00590 (Arachidonic acid metabolism)	Enzyme	COX	COX
M92241	N	16	50	10	DMSO	83-73-8	T0513	Iodoquinol	5,7-Diiodo-8-hydroxyquinoline; 5,7-Diiodo-8-quinolinol; Diiodohydroxyquinoline	Oc1c(I)cc(I)c2c1nccc2	C9H5I2NO	396.96	Microbiology/virology	Antibacterial; Antibiotic	Antibiotic; Bacterial	Diiodohydroxyquinoline, a topical therapeutic agent, has satisfactory antibacterial properties.	Fisher AK, et al. J Toxicol Clin Toxicol. 1993;31(1):113-20.	3728	iodoquinol; 83-73-8; Diiodohydroxyquinoline; 5,7-diiodoquinolin-8-ol; 5,7-Diiodo-8-hydroxyquinoline; 5,7-Diiodo-8-quinolinol; Diiodoquin; Diodoquin; Yodoxin; DIIODOHYDROXYQUIN; Lanodoxin; Searlequin; Zoaquin; Ioquin; Quinadome; Sebaquin; 8-Quinolinol, 5,7-diiodo-; Diodohydroxyquin; Dijodoxichinoline; Enterodiamoebin; Diamoebin; Dinoleine; Diodoquine; Diodoxylin; Direxiode; Disoquin; Embequin; Ent…	UXZFQZANDVDGMM-UHFFFAOYSA-N	CHEMBL86754	IODOQUINOL	Others	Others	Antibacterial; Antibiotic; Others; Others	Antibacterial and antiprotozoal		https://www.sciencedirect.com/topics/medicine-and-dentistry/iodoquinol		Antimicrobial agent	Antibacterial_and_antiprotozoal	Antibacterial
M92241	N	17	50	10	DMSO	1227-61-8	T0273	Mefexamide hydrochloride	Mefexamide; Timodyne; Mefaxadyne	CCN(CC)CCNC(=O)COc1ccc(OC)cc1	C15H25ClN2O3	316.82	Others	Others	Others	Mefexamide hydrochloride is a central stimulant.	Vinogradov VM, Grechko AT. Farmakol Toksikol. 1982 Sep-Oct;45(5):108-11.	4045	mefexamide; Timodyne; 1227-61-8; Mefexadyne; Mexephenamide; Mefaxadyne; Mephexamide; Mefesamide [DCIT]; Mefesamide; Mefexamida; Mefexamidum; Mefexamide [USAN:INN]; Mefexamidum [INN-Latin]; Mefexamida [INN-Spanish]; N-[2-(diethylamino)ethyl]-2-(4-methoxyphenoxy)acetamide; Acetamide, N-(2-(diethylamino)ethyl)-2-(4-methoxyphenoxy)-; ANP 297; EINECS 214-963-1; BRN 2219009; mefaxamid; mefessamide; U-2…	HUNIPYLVUPMFCZ-UHFFFAOYSA-N	CHEMBL1368380	MEFEXAMIDE	Others	Others	Others; Others; Others						Others	Others
M92241	N	18	50	10	DMSO	145-41-5	T0516	Sodium dehydrocholate	Dehydrocholate sodium	[Na+].[O-]C(=O)CC[C@@H](C)[C@H]1CC[C@@H]2[C@]1(C)C(=O)C[C@H]1[C@H]2C(=O)C[C@@H]2CC(=O)CC[C@]12C	C24H33NaO5	424.51	Metabolism	Endogenous Metabolite; Lipid	Endogenous Metabolite; lipolysis	Dehydrocholic sodium, a hydrocholeretic, can increase bile output to clear increased bile acid load.	Yousef IM, et al. Hepatology. 1987 May-Jun;7(3):535-42.	23675007	Sodium dehydrocholate; 145-41-5; DEHYDROCHOLATE SODIUM; Decholin Sodium; Dehydrocholate (sodium); Dehydrocholic acid sodium salt; Natriumdehydrocholat; Biliron; Carachol; Dehidrocolato sodico; Natrii dehydrocholas; Dehydrocholate de sodium; Sodium 3,7,12-trioxo-5beta-cholan-24-oate; Dehydrocholate sodium [USP]; Sodium dehydrocholate [INN]; Biliton; Dycholium; Suprachol; Dilabil sodium; UNII-W4193…	FKJIJBSJQSMPTI-CAOXKPNISA-M	CHEMBL2106184	DEHYDROCHOLATE SODIUM	Others	Others	Endogenous Metabolite; Lipid; Others; Others						Metabolite	Endogenous Metabolite
M92241	N	19	50	10	DMSO	28657-80-9	T0274	Cinoxacin	Compound 64716	CCn1nc(C(=O)O)c(=O)c2cc3c(OCO3)cc12	C12H10N2O5	262.22	DNA Damage/DNA Repair; Microbiology/virology	Antibacterial; Antibiotic; Topoisomerase	Bacterial; Antibiotic; Topo II	Cinoxacin, an older synthetic antimicrobial, was related to the quinolone class of antibiotics. Its activity was similar to oxolinic acid and nalidixic acid.	Jariyawat S, et al. J Pharmacol Exp Ther. 1999 Aug;290(2):672-7.	2762	cinoxacin; 28657-80-9; Cinobac; Compound 64716; Cinoxacino; Cinoxacinum; Cinobactin; Cinoxacine; Uronorm; Clinoxacin; Cinx; Azolinic Acid; Cinoxacine [INN-French]; Cinoxacinum [INN-Latin]; Lilly 64716; Cinoxacino [INN-Spanish]; 1-Ethyl-6,7-methylenedioxy-4(1H)-oxocinnoline-3-carboxylic acid; Cinobac (TN); NSC 304467; MLS000069630; 1-ethyl-4-oxo-[1,3]dioxolo[4,5-g]cinnoline-3-carboxylic acid; Cino…	VDUWPHTZYNWKRN-UHFFFAOYSA-N	CHEMBL1208	CINOXACIN	Others	Others	Antibacterial; Antibiotic; Topoisomerase; Others; Others	DNA gyrase (topoisomerase type II)	GYR	https://www.sciencedirect.com/topics/neuroscience/cinoxacin	hsa03030	Topoisomerase	Topoisomerase	Antibacterial
M92241	N	20	50	10	DMSO	3963-95-9	T0518	Methacycline hydrochloride	Methacycline HCl; Rondomycin	Cl.CN(C)[C@H]1[C@@H]2[C@@H](O)[C@@H]3C(=C)c4cccc(O)c4C(=O)C3=C(O)[C@]2(O)C(=O)C(C(N)=O)=C1O	C22H23ClN2O8	478.88	Microbiology/virology	Antibacterial; Antibiotic; ribosome	16S ribosome; 30S ribosome; Bacterial; Antibiotic	Methacycline hydrochloride is a broad-spectrum semisynthetic antibiotic related to TETRACYCLINE but excreted more slowly and maintaining effective blood levels for a more extended period.	Xi Y, et al. Am J Respir Cell Mol Biol,2014, 50(1), 51-60.	54685047	METHACYCLINE HYDROCHLORIDE; 3963-95-9; Methacycline HCl; Metacycline hydrochloride; Rondomycin; Adriamicina; Ciclobiotic; Germiciclin; Metadomus; Globociclina; Metilenbiotic; Physiomycine; Londomycin; Megamycine; Optimycin; Rindex; Methacycline (hydrochloride); Methacycline monohydrochloride; EINECS 223-568-3; UNII-9GJ0N7ZAP0; NSC 356465; NSC-356465; NSC-757835; 9GJ0N7ZAP0; CHEBI:6806; Methacycli…	VXPSARQTYDZXAO-CCHMMTNSSA-N			Others	Others	Antibacterial; Antibiotic; ribosome; Others; Others	ribosome		Schnappinger D, Hillen W. "Tetracyclines: antibiotic action, uptake, and resistance mechanisms." Archives of Microbiology, 2006; Vol. 179, Issue 6, pp. 429-442.	map03010	Antibiotic	Bacterial_Ribosome	Antibacterial
M92241	N	21	50	10	DMSO	1084-65-7	T0275	Meticrane	Arresten; Fontiliz	Cc1c(cc2c(CCCS2(=O)=O)c1)S(=O)(=O)N	C10H13NO4S2	275.34	Membrane transporter/Ion channel	Chloride Channel; Sodium Channel	Chloride Channel; Sodium Channel	Meticrane is a sulphonamide-derivative with thiazide-like diuretic activity.	Boissier JR, et al. Ann Pharm Fr. 1970 Jul-Aug;28(7):497-509.	4165	meticrane; 1084-65-7; Arresten; Fontiliz; 6-Methylthiochroman-7-sulfonamide 1,1-dioxide; Meticranum [INN-Latin]; Meticranum; Meticran; Meticrano; C10H13NO4S2; Meticrano [INN-Spanish]; SD 17102; Meticrane [INN:DCF:JAN]; EINECS 214-112-4; 6-methyl-1,1-dioxo-3,4-dihydro-2H-thiochromene-7-sulfonamide; NSC-759309; E-103-E; UNII-I7EKN1924Q; 2H-1-Benzothiopyran-7-sulfonamide, 3,4-dihydro-6-methyl-, 1,1-…	FNQQBFNIYODEMB-UHFFFAOYSA-N	CHEMBL1318341	METICRANE	Others	Others	Chloride Channel; Sodium Channel; Others; Others	Chloride Channel	CLCN	https://pubmed.ncbi.nlm.nih.gov/2029914/ "The thiazide-sensitive Na-Cl cotransporter is an aldosterone-induced protein." Kidney Int. 1991;39(5):952-9.	hsa04960	Ion channel	Chloride_Channel	Chloride Channel
M92241	N	22	50	10	DMSO	83-75-0	T0519	Euquinine	Quinine ethylcarbonate	CCOC(=O)O[C@@H]([C@@H]1C[C@@H]2CC[N@]1C[C@@H]2C=C)c1ccnc2ccc(OC)cc12	C23H28N2O4	396.48	Others	Others	Others	Euquinine generally is served as the febrifuge, antimalarial, and tonic.	Muratova, F., & Gengrinovich, A. (1964). QUANTITATIVE DETERMINATION OF QUININE AND EUQUININE WITH AN AQUEOUS SOLUTION OF BROMINE IODINE.Â Aptechn Delo.,Â Jul-Aug(13), 43-6.	6975516	quinine ethylcarbonate; EUQUININE; 83-75-0; QUININE ETHYL CARBONATE; Aecachinium; Euquinin; Quinine etabonate; Ethyl quinine carbonate; DTXSID0045965; Quinine ethylcarbonate [JAN:NF]; UNII-L2V8911157; NSC-755879; L2V8911157; Quinine ethylcarbonate [JAN]; CCRIS 5758; C23H28N2O4; ethylquinincarbonat-; Cinchonan-9-ol,6'-methoxy-, 9-(ethyl carbonate), (8a,9R)-; EINECS 201-500-3; Aecachinium; Euquinin…	NSBRKSWSLRQPJW-WWLNLUSPSA-N	CHEMBL3138665	QUININE ETHYLCARBONATE	Others	Others	Others; Others; Others						Others	Others
M92241	O	3	50	10	DMSO	67-43-6	T0420	Pentetic Acid	diethylenetriaminepentaacetic acid; DTPA; Acidum penteticum; Detapac; Detarex	OC(=O)CN(CCN(CC(=O)O)CC(=O)O)CCN(CC(=O)O)CC(=O)O	C14H23N3O10	393.35	Others	others	chelating agent	Pentetic Acid is an edetate and a chelating agent used in preparing radiopharmaceuticals.	Gi M, et al. Antimicrob Agents ChemOthers. 2014 Dec; 58(12):7205-14.	3053	Pentetic acid; diethylenetriaminepentaacetic acid; 67-43-6; DTPA; Detapac; Detarex; Titriplex V; Perma kleer; Monaquest CAI; Hamp-Ex Acid; Penthanil; Dabeersen 503; CHEL 330 acid; Diethylenetriamine Pentaacetic Acid; Pentacarboxymethyldiethylenetriamine; Chel DTPA; Pentetate; Dissolvine D; Acidum penteticum; H5dtpa; (Diethylenetrinitrilo)pentaacetic acid; Penthamil (VAN); Diethylenetriamine-N,N,N…	QPCDCPDFJACHGM-UHFFFAOYSA-N	CHEMBL780	PENTETIC ACID	Others	Others	others; Others; Others						Others	others
M92241	O	4	50	10	DMSO	131707-23-8	T0104	Arbidol hydrochloride	Umifenovir hydrochloride; Arbidol HCl	Cl.CCOC(=O)c1c(CSc2ccccc2)n(C)c2cc(Br)c(O)c(CN(C)C)c12	C22H25BrN2O3SÂ·HCl	513.88	Microbiology/virology	Influenza Virus; SARS-CoV	Influenza A virus; Influenza Virus; SARS-CoV	Arbidol (Umifenovir) hydrochloride, an broad-spectrum antiviral chemical agent, can inhibit cell invade of enveloped viruses by blocking viral fusion with host cell membrane.	PÃ©cheur EI, et al. Biochemistry, 2007, 46(20), 6050-6059.	9958103	Arbidol Hydrochloride; 131707-23-8; Arbidol HCl; Umifenovir hydrochloride; Ethyl 6-bromo-4-((dimethylamino)methyl)-5-hydroxy-1-methyl-2-((phenylthio)methyl)-1H-indole-3-carboxylate hydrochloride; Arbidol (hydrochloride); Arbidol HCl (Umifenovir); UNII-8CXV4OU367; 8CXV4OU367; Umifenovir (hydrochloride); MFCD00344795; ethyl 6-bromo-4-[(dimethylamino)methyl]-5-hydroxy-1-methyl-2-(phenylsulfanylmethy…	OMZHXQXQJGCSKN-UHFFFAOYSA-N	CHEMBL5179853		Others	Others	Influenza Virus; SARS-CoV; Others; Others	Hemagglutinin	HA	Kadam, R.U., & Wilson, I.A. (2017). "Structural basis of influenza virus fusion inhibition by the antiviral drug Arbidol." Proceedings of the National Academy of Sciences, 114(2), 206-214.	hsa05164	Viral fusion protein	Hemagglutinin	Influenza Virus
M92241	O	5	50	10	DMSO	4008-48-4	T0400	Nitroxoline	5-Nitro-8-quinolinol; 8-Hydroxy-5-nitroquinoline; 5-nitroquinolin-8-ol; 5-Nitro-8-hydroxyquinoline	Oc1c2ncccc2c(cc1)[N+](=O)[O-]	C9H6N2O3	190.16	Autophagy; Microbiology/virology	Antibacterial; Antibiotic; Autophagy	antibacterial; Bacterial; Autophagy; Antibiotic	Nitroxoline is a urinary antibacterial agent active against susceptible gram-positive and gram-negative organisms commonly found in urinary tract infections.	MirkoviÄ‡ B, et al. Oncotarget. 2015 Aug 7;6(22):19027-42.	19910	NITROXOLINE; 5-nitroquinolin-8-ol; 8-Hydroxy-5-nitroquinoline; 4008-48-4; 5-Nitro-8-hydroxyquinoline; 5-Nitro-8-quinolinol; Nitroxolin; 5-Nitrox; Noxibiol; Nibiol; Noxin; 8-Quinolinol, 5-nitro-; 5-Nitroxine; 5-Nitroks; 5-NOK; 5-Nitro-8-oxyquinoline; 5NOK; Nitroxolinum; 5-Nitro-8-oxychinoline; Nitroxolina; Galinok; Isinok; Nicene Forte; Nitroxolinum [INN-Latin]; Nitroxolina [INN-Spanish]; A-82; Ur…	RJIWZDNTCBHXAL-UHFFFAOYSA-N	CHEMBL1454910	NITROXOLINE	Others	Others	Antibacterial; Antibiotic; Autophagy; Others; Others	Bacterial DNA Gyrase and Topoisomerase IV	GyrB/ParE	Krajewski, M., W. OlÄ™dzki, and others. "Nitroxoline impairs tumor progression in vitro and in vivo by regulating cathepsin B activity." Oncotarget 8.52 (2017): 89620-89635. https://doi.org/10.18632/oncotarget.21052		Antibacterial	Bacterial_DNA_Gyrase_and_Topoisomerase_IV	Antibacterial
M92241	O	6	50	10	DMSO	28395-03-1	T0108	Bumetanide	PF 1593; Ro 10-6338	CCCCNc1cc(cc(c1Oc1ccccc1)S(N)(=O)=O)C(O)=O	C17H20N2O5S	364.41	Membrane transporter/Ion channel	Na-K-Cl cotransporter	Na-K-Cl cotransporter	Bumetanide is a potent sulfamoylanthranilic acid derivative belonging to the class of loop diuretics. In the brain, bumetanide may prevent seizures in neonates by blocking the bumetanide-sensitive sodium-potassium-chloride cotransporter (NKCC1), thereby inhibiting chloride uptake thus, decreasing the internal chloride concentration in neurons and may block the excitatory effect of GABA in neonate…	Thakker RV. Adv Nephrol Necker Hosp. 1999;29:289-98.	2471	bumetanide; 28395-03-1; 3-(Butylamino)-4-phenoxy-5-sulfamoylbenzoic acid; Bumex; Burinex; Fordiuran; Lunetoron; Fontego; Segurex; Ro 10-6338; Aquazone; Bumetanida; Bumetanidum; Bumethanide; Burine; Butinat; Cambiex; Diurama; Yurinex; Bumetanidum [INN-Latin]; PF 1593; 3-(Aminosulfonyl)-5-(butylamino)-4-phenoxybenzoic acid; Bumetanida [INN-Spanish]; Lixil-Leo; Benzoic acid, 3-(aminosulfonyl)-5-(but…	MAEIEVLCKWDQJH-UHFFFAOYSA-N	CHEMBL1072	BUMETANIDE	Others	Others	Na-K-Cl cotransporter; Others; Others	Na-K-Cl cotransporter	NKCC1	https://pubmed.ncbi.nlm.nih.gov/6308272/	hsa04960	Cotransporter	Na-K-Cl_cotransporter	Na-K-Cl cotransporter
M92241	O	7	50	10	DMSO	3011-89-0	T0390	Alkomide	2-Chloro-4-nitrobenzamide; Aklomide	NC(=O)c1c(Cl)cc(cc1)[N+](=O)[O-]	C7H5ClN2O3	200.58	Microbiology/virology	Antibiotic; Parasite	Antibiotic; Parasite	Aklomide is used in poultry to treat parasites.	Baron RR, et al. Poult Sci. 1966 Mar;45(2):411-8.	2075	aklomide; 2-Chloro-4-nitrobenzamide; 3011-89-0; Aklomix; Alkomide; Clomide; Benzamide, 2-chloro-4-nitro-; component of Aklomix; Aklomida; Aklomidum; component of Novastat-W; C7H5ClN2O3; Caswell No. 198A; Aklomidum [INN-Latin]; 2-Chlor-4-nitrobenzamid; Aklomida [INN-Spanish]; NSC 191832; NSC-191832; Aklomide [USAN:INN:BAN]; UNII-B0E341RA20; DTXSID3041405; B0E341RA20; EINECS 221-143-7; EPA Pesticid…	GFGSZUNNBQXGMK-UHFFFAOYSA-N	CHEMBL1450565	AKLOMIDE	Others	Others	Antibiotic; Parasite; Others; Others						Antibiotic	Antibiotic
M92241	O	8	50	10	DMSO	25717-80-0	T0109	Molsidomine	Morsydomine; SIN-10; Corvaton	CCOC(=O)[N-]c1c[n+](no1)N1CCOCC1	C9H14N4O4	242.23	Immunology/Inflammation; NF-ÎºB	NOD	NOD	Molsidomine is an orally active, long-acting vasodilating drug. It metabolizes in the liver to the active metabolite linsidomine, that releases nitric oxide (NO) upon decay as the actual vasodilating compound.	Volker B. Fiedler, et al. Naunyn-Schmiedeberg's Archives of Pharmacology. 1981, 317(1):71-77.	4238	SIN-10;Morsydomine; CHEBI:31861; XLFWDASMENKTKL-NTMALXAHSA-N; HMS3369H14; HMS3373B04; Molsidomine 1.0 mg/ml in Methanol; AKOS030254869; LP00725; M2524; C74337; Q408132; (Z)-5-(ethoxycarbonylimino)-3-morpholino-5H-1,2,3-oxadiazol-3-ium-2-ide	XLFWDASMENKTKL-UHFFFAOYSA-N	CHEMBL1329455	MOLSIDOMINE	Others	Others	NOD; Others; Others	Soluble guanylate cyclase (sGC)	sGC	Stasch JP, Schmidt PM, Nedvetsky PI, Nedvetskaya TY, HS AK, Meurer S, Deile M, Taye A, Knorr A, Lapp H, MÃ¼ller H, Turgay Y, Rothkegel C, Tersteegen A, Kemp-Harper B, MÃ¼ller-Esterl W, Schmidt HH. "Targeting the heme-oxidized nitric oxide receptor for selective vasodilatation of diseased blood vessels." The Journal of Clinical Investigation. 2006 Sep;116(9):2552-61.	map00230	enzyme	Soluble_guanylate_cyclase_(sGC)	NOD
M92241	O	9	50	10	DMSO	637-58-1	T0460	Pramoxine hydrochloride	Pramocaine hydrochloride; Pramoxine HCl	Cl.CCCCOc1ccc(OCCCN2CCOCC2)cc1	C17H27NO3Â·HCl	329.86	Membrane transporter/Ion channel	Sodium Channel	Sodium Channel	Pramocaine hydrochloride, a topical anesthetic, is served as an antipruritic.	Rosenkrantz W, et al. Clin Tech Small Anim Pract, 2006, 21(3), 106-116.	73957	Pramoxine hydrochloride; 637-58-1; Pramoxine HCl; Pramocaine hydrochloride; Tronolane; Prax Lotion; Pramocaine (hydrochloride); 4-[3-(4-butoxyphenoxy)propyl]morpholine hydrochloride; ProctoFoam-NS; HSDB 7220; 4-(3-(4-butoxyphenoxy)propyl)morpholine hydrochloride; Morpholine, 4-[3-(4-butoxyphenoxy)propyl]-, hydrochloride; EINECS 211-293-1; NSC 25573; NSC-25573; Pramoxine hydrochloride [USP]; UNII-…	SYCBXBCPLUFJID-UHFFFAOYSA-N	CHEMBL1201171	PRAMOXINE HYDROCHLORIDE	Others	Others	Sodium Channel; Others; Others	Sodium Channel		https://www.accessdata.fda.gov/drugsatfda_docs/label/2010/022370lbl.pdf	hsa00520	Ion Channel	Sodium_Channel	Sodium Channel
M92241	O	10	50	10	DMSO	7481-89-2	T0110	Zalcitabine	2',3'-Dideoxycytidine; Dideoxycytidine; ddC; NSC 606170; Ro 24-2027/000	Nc1nc(=O)n(cc1)[C@H]1CC[C@@H](CO)O1	C9H13N3O3	211.22	Microbiology/virology; Proteases/Proteasome	HIV Protease; Reverse Transcriptase	HIV; Reverse Transcriptase	Zalcitabine(Dideoxycytidine;ddC; 2', 3'-Dideoxycytidine) is a nucleoside analog reverse transcriptase inhibitor (NRTI); At low concentrations, It can potently inhibit HIV replication by binding to reverse transcriptase terminated synthesis of viral DNA chain.	Adkins JC, et al. Zalcitabine. An update of its pharmacodynamic and pharmacokinetic properties and clinical efficacy in the management of HIV infection.Drugs. 1997 Jun;53(6):1054-80.	24066	zalcitabine; Dideoxycytidine; 7481-89-2; 2',3'-DIDEOXYCYTIDINE; ddCyd; HIVID; Cytidine, 2',3'-dideoxy-; ddC; 4-Amino-1-((2R,5S)-5-(hydroxymethyl)tetrahydrofuran-2-yl)pyrimidin-2(1H)-one; Zalcitibine; ddC (Antiviral); NSC 606170; Ro 24-2027/000; C9H13N3O3; 2,3-dideoxycytidine; Ro-24-2027/000; CCRIS 692; Hivid(TM); NSC-606170; Zalcitabine [USAN:INN:BAN]; Hivid (TN); Interferon AD + ddC; HSDB 7156; …	WREGKURFCTUGRC-POYBYMJQSA-N	CHEMBL853	ZALCITABINE	Others	Others	HIV Protease; Reverse Transcriptase; Others; Others	Reverse Transcriptase	RT	https://www.ncbi.nlm.nih.gov/pmc/articles/PMC2365486/	hsa05203	enzyme	Reverse_Transcriptase	HIV Protease
M92241	O	11	50	10	DMSO	2066-89-9	T0441	Pasiniazid	Isonicotinic acid hydrazide p-aminosalicylate; Pasiniazide; Paraniazide	NNC(=O)C1=CC=NC=C1.NC1=CC(O)=C(C=C1)C(O)=O	C13H14N4O4	290.28	Immunology/Inflammation; Metabolism; Neuroscience	COX; NADPH	COX; NADPH	Pasiniazid is an anti-TB and anti-leprosy drug.	Pym AS, et al. Mol Microbiol. 2001 May;40(4):879-89.	16367	Pasiniazid; 2066-89-9; Pasiniazide; Isoniazid 4-aminosalicylate; Paraniazide; Pasiniazida; Pasiniazidum; Pasiniazid [INN:DCF]; RD 328; Pasiniazide [INN-French]; Pasiniazidum [INN-Latin]; Pasiniazida [INN-Spanish]; UNII-83J17CN0MN; 83J17CN0MN; Isonicotinic acid hydrazide compound with 4-amino-salicylic acid; EINECS 218-183-2; NSC-758447; Paraniazide;Pasiniazide;Isonicotinic acid hydrazide p-aminos…	RKPHTRVPGYGVQD-UHFFFAOYSA-N	CHEMBL1496806		Others	Others	COX; NADPH; Others; Others	NADPH	NADPH	"Prodrugs: design and clinical applications." Rautio J, Meanwell NA, Di L, Hageman MJ. Nat Rev Drug Discov. 2018 Mar;17(3):197-218. doi: 10.1038/nrd.2017.243. Epub 2018 Feb 23.		Enzyme	NADPH_MetabolismEnzyme	COX
M92241	O	12	50	10	DMSO	33286-22-5	T0112	Diltiazem hydrochloride	CRD-401; Diltiazem HCl; RG 83606 HCl	Cl.COc1ccc(cc1)[C@@H]1Sc2ccccc2N(CCN(C)C)C(=O)[C@@H]1OC(C)=O	C22H27ClN2O4S	450.98	Membrane transporter/Ion channel; Metabolism	Calcium Channel	Calcium Channel	Diltiazem Hydrochloride is a benzothiazepine calcium channel blocking agent with vasodilating action due to its antagonism of the actions of CALCIUM ion on membrane functions.	Kraus RL, et al. Molecular mechanism of diltiazem interaction with L-type Ca2+ channels. J Biol Chem. 1998 Oct 16;273(42):27205-12.	62920	Diltiazem hydrochloride; 33286-22-5; Diltiazem HCl; Cardizem; Dilzem; Dilzene; Masdil; (+)-cis-Diltiazem hydrochloride; CRD-401; Altiazem; Deltazen; Diladel; Dilpral; Dilrene; Tildiem; Adizem; Tiazac; Herbesser; Lacerol; Zilden; Mono-Tildiem; Bi-Tildiem; Cardizem CD; Cardizem LA; Diltiazem (hydrochloride); Dilzicardin; Anginyl; Angitil; Angizem; Britiazim; Calcicard; Calnurs; Cardiazem; Cirilen; …	HDRXZJPWHTXQRI-BHDTVMLSSA-N	CHEMBL1697	DILTIAZEM HYDROCHLORIDE	Others	Others	Calcium Channel; Others; Others	Calcium Channel	CACNA1	https://www.ncbi.nlm.nih.gov/pmc/articles/PMC1476026/	hsa04260	Channel blocker	Calcium_Channel	Calcium Channel
M92241	O	13	50	10	DMSO	121-54-0	T0401	Benzethonium chloride	Quatrachlor; Hyamine; Phemeride	[Cl-].CC(C)(C)CC(C)(C)c1ccc(OCCOCC[N+](C)(C)Cc2ccccc2)cc1	C27H42ClNO2	448.09	Neuroscience	AChR	nAChR; Î±4Î²2 nAChRs; Î±7 nAChRs	Benzethonium is a synthetic quaternary ammonium salt with surfactant, antiseptic, and broad spectrum antimicrobial properties.	Coates KM, et al. Br J Pharmacol, 2001, 134(4), 871-879.	8478	benzethonium chloride; 121-54-0; Hyamine; Phemeride; Phemerol Chloride; Quatrachlor; Benzethoniumchloride; Hyamine 1622; Disilyn; Kylacol; Phemerol; Phemithyn; Diapp; Solamin; Benzetonium chloride; Antiseptol; Banagerm; Inactisol; Solamine; Anti-germ 77; Neostelin green; Benzetonio cloruro; Chlorure de benzethonium; Benzethoni chloridum; Sanizol; Benzethonii chloridum; Cloruro de benzetonio; Micr…	UREZNYTWGJKWBI-UHFFFAOYSA-M	CHEMBL221753	BENZETHONIUM CHLORIDE	Others	Others	AChR; Others; Others	Acetylcholine receptor	AChR	"Benzethonium Chloride" in PubChem Compound Database; U.S. National Library of Medicine. Available from: https://pubchem.ncbi.nlm.nih.gov/compound/Benzethonium-chloride#section=Pharmacology-and-Biochemistry	hsa04080	Ion channel	AChR	AChR
M92241	O	14	50	10	DMSO	6153-33-9	T0113	Mebhydrolin napadisylate	Mebhydroline 1,5-naphthalenedisulfonate salt; Diazoline; Diazolin; Incidal; Omeril	O=S(=O)(O)c1c2cccc(S(=O)(=O)O)c2ccc1.CN1Cc2c(CC1)n(Cc1ccccc1)c1ccccc21.CN1Cc2c(CC1)n(Cc1ccccc1)c1ccccc21	C19H20N2Â·1/2C10H8O6S2	420.52	GPCR/G Protein; Immunology/Inflammation; Neuroscience	5-HT Receptor; AChR; Histamine Receptor	Histamine Receptor; HT; mAChR	Mebhydrolin (napadisylate) is an antihistamine used to relieve allergic symptoms caused by histamine release, including nasal allergies and allergic dermatosis.	Franks HM, et al. Med J Aust. 1981 Oct 31;2(9):477-9.	22529	6153-33-9; Mebhydrolin napadisylate; Diazoline; Mebhydrolin napadisilate; Omeril; Diazolin; Incidal; Mebhydroline Napadisylate; Mebhydroline 1,5-naphthalenedisulfonate salt; Diazolinum; Fabahistin; Mebhydrolin (napadisylate); mebhydroline 1,5-naphthalenedisulfonate; EINECS 228-170-3; UNII-O5G04RB25M; Mebhydrolin napadisylate [JAN]; O5G04RB25M; DTXSID3045566; Mebhydrolin 1,5-naphtalenedisulfonate;…	CJUOSBUQOWKEKJ-UHFFFAOYSA-N	CHEMBL1324326		Others	Others	5-HT Receptor; AChR; Histamine Receptor; Others; Others	Histamine Receptor	HR	https://www.drugbank.ca/drugs/DB06698	hsa04080	receptor	Histamine_Receptor	5-HT Receptor
M92241	O	15	50	10	DMSO	165800-03-3	T0391	Linezolid	PNU-100766	CC(=O)NC[C@H]1CN(C(=O)O1)c1cc(F)c(cc1)N1CCOCC1	C16H20FN3O4	337.35	Microbiology/virology; Neuroscience	Antibacterial; Antibiotic; MAO	AOA; AOB; Bacterial; Antibiotic	Linezolid, the first of the oxazolidinone class, is a synthetic antibiotic used for the therapy of infections resulted from multi-resistant bacteria including methicillin-resistant Staphylococcus aureus (MRSA) and streptococcus. The drug takes effect as the inhibitor of the initiation of bacterial protein synthesis.	Swaney SM, et al. Antimicrob Agents Chemother, 1998, 42(12), 3251-3255.	441401	linezolid; 165800-03-3; Zyvox; PNU-100766; (S)-N-((3-(3-fluoro-4-morpholinophenyl)-2-oxooxazolidin-5-yl)methyl)acetamide; Zyvoxid; U-100766; Zyvoxam; PNU 100766; U 100766; C16H20FN3O4; Zivoxid; LINEZOLIDE; Zyvoxa; HSDB 7478; Linezolid [USAN:INN]; UNII-ISQ9I6J12J; ISQ9I6J12J; N-(((S)-3-(3-Fluoro-4-morpholinophenyl)-2-oxo-5-oxazolidinyl)methyl)acetamide; Zyvox (TN); DTXSID5046489; CHEBI:63607; U-10…	TYZROVQLWOKYKF-ZDUSSCGKSA-N	CHEMBL126	LINEZOLID	Others	Others	Antibacterial; Antibiotic; MAO; Others; Others	23S rRNA of the 50S subunit in bacterial ribosome		https://www.ncbi.nlm.nih.gov/pmc/articles/PMC1479130/		Antibiotic	Bacterial_Ribosome	Antibacterial
M92241	O	16	50	10	DMSO	133-67-5	T0114	Trichlormethiazide	Naqua; Trichlormetazid; Metahydrin	NS(=O)(=O)c1cc2c(NC(NS2(=O)=O)C(Cl)Cl)cc1Cl	C8H8Cl3N3O4S2	380.66	Membrane transporter/Ion channel; Metabolism	ATPase; Carbonic Anhydrase	Na+/K+-ATPase; Carbonic anhydrase	Trichlormethiazide is a short-acting, 3-dichloromethyl derivative of hydrochlorothiazide, belonging to the class of thiazide diuretics. Trichlormethiazide appears to block the active reabsorption of chloride and possibly sodium in the ascending loop of Henle, altering electrolyte transfer in the proximal tubule.	Temperini C, et al. Bioorg Med Chem. 2009 Feb 1;17(3):1214-21.	5560	trichlormethiazide; 133-67-5; Trichloromethiazide; Naqua; Metahydrin; Trichlormetazid; Achletin; Trichlormethiazid; Diu-Hydrin; Chlopolidine; Hydrotrichlorothiazide; Aponorin; Cretonin; Diurazida; Diuroral; Fluitran; Gangesol; Intromene; Isestran; Schebitran; Triflumen; Diurese; Esmarin; Flutra; Nakva; Triclordiuride; Anistadin; Carvacron; Kubacron; Tachionin; Tolcasone; Trichlorex; Eurinol; Tric…	LMJSLTNSBFUCMU-UHFFFAOYSA-N	CHEMBL1054	TRICHLORMETHIAZIDE	Others	Others	ATPase; Carbonic Anhydrase; Others; Others	Carbonic Anhydrase	CA	https://www.ncbi.nlm.nih.gov/pmc/articles/PMC3638343/	hsa00190	Enzyme	Carbonic_Anhydrase	ATPase
M92241	O	17	50	10	DMSO	90357-06-5	T0380	Bicalutamide	ICI-176334	CC(O)(CS(=O)(=O)c1ccc(F)cc1)C(=O)Nc1cc(c(cc1)C#N)C(F)(F)F	C18H14F4N2O4S	430.37	Autophagy; Endocrinology/Hormones	Androgen Receptor; Autophagy	Androgen Receptor; Autophagy	Bicalutamide, a synthetic, nonsteroidal antiandrogen, competitively binds to cytosolic androgen receptors in target tissues, thereby inhibiting the receptor binding of androgens.	Clegg NJ, et al. Cancer Res. 2012, 72(6), 1494-1503.	2375	bicalutamide; 90357-06-5; Casodex; Cosudex; Bicalutamide (CDX); Calutide; ICI 176334; ICI-176334; C18H14F4N2O4S; N-(4-cyano-3-(trifluoromethyl)phenyl)-3-((4-fluorophenyl)sulfonyl)-2-hydroxy-2-methylpropanamide; Raffolutil; N-[4-cyano-3-(trifluoromethyl)phenyl]-3-(4-fluorophenyl)sulfonyl-2-hydroxy-2-methylpropanamide; Casodex (TN); ICI 176,334; Bicalutamide [USAN:INN:BAN]; UNII-A0Z3NAU9DP; A0Z3NAU…	LKJPYSCBVHEWIU-UHFFFAOYSA-N	CHEMBL409	BICALUTAMIDE	Others	Others	Androgen Receptor; Autophagy; Others; Others	Androgen Receptor	AR	Tran C, Ouk S, Clegg NJ, Chen Y, Watson PA, Arora V, Wongvipat J, Smith-Jones PM, Yoo D, Kwon A, Wasielewska T, Welsbie D, Chen CD, Higano CS, Beer TM, Hung DT, Scher HI, Jung ME, Sawyers CL. "Development of a second-generation antiandrogen for treatment of advanced prostate cancer." Science. 2009 May 8;324(5928):787-90. doi: 10.1126/science.1168175. Epub 2009 Apr 9. PMID: 19359544; PMCID: PMC298…	hsa05200	receptor	Androgen_Receptor	Androgen Receptor
M92241	O	18	50	10	DMSO	10045-45-1	T2604	1-Ethyl-2-benzimidazolinone	1-EBIO	c1ccc2c(c1)[nH]c(=O)n2CC	C9H10N2O	162.19	Membrane transporter/Ion channel; Metabolism	Calcium Channel	Calcium Channel	1-Ethyl-2-benzimidazolinone is a calium channel agonist.	Walker SD, et al. Br J Pharmacol. 2001 Dec;134(7):1548-54.	82320	10045-45-1; 1-EBIO; 1-Ethyl-2-benzimidazolinone; 1-Ethylbenzimidazolinone; 1-ethyl-1H-benzo[d]imidazol-2(3H)-one; 3-ethyl-1H-benzimidazol-2-one; 1-ethyl-1,3-dihydro-2h-benzimidazol-2-one; 2H-Benzimidazol-2-one, 1-ethyl-1,3-dihydro-; 1-Ethylbenzimidazolin-2-one; EBIO; EINECS 233-148-1; UNII-M82W79SS4W; CHEMBL452887; M82W79SS4W; CHEBI:34076; 1-Ethyl-1,3-dihydro-benzoimidazol-2-one; 1-Ethyl-Benzimid…	CXUCKELNYMZTRT-UHFFFAOYSA-N	CHEMBL452887		Others	Others	Calcium Channel; Others; Others						Calcium_Channel	Calcium Channel
M92241	O	19	50	10	DMSO	183321-74-6	T0373	Erlotinib	OSI-744; R1415; NSC 718781; CP358774	COCCOc1cc2ncnc(Nc3cccc(c3)C#C)c2cc1OCCOC	C22H23N3O4	393.44	Angiogenesis; Autophagy; JAK/STAT signaling; Tyrosine Kinase/Adaptors	Autophagy; EGFR	Autophagy; EGFR	Erlotinib is an EGFR inhibitor (IC50: 2 nM). It is used for the treatment of non-small cell lung cancer.	Moyer JD, et al. Induction of apoptosis and cell cycle arrest by CP-358,774, an inhibitor of epidermal growth factor receptor tyrosine kinase. Cancer Res. 1997, 57(21), 4838-4848.	176870	Erlotinib; 183321-74-6; N-(3-Ethynylphenyl)-6,7-bis(2-methoxyethoxy)quinazolin-4-amine; Tarceva; Erlotinib free base; 4-[(3-Ethynylphenyl)amino]-6,7-bis(2-methoxyethoxy)quinazoline; Erlotinib [INN]; 4-Quinazolinamine, N-(3-ethynylphenyl)-6,7-bis(2-methoxyethoxy)-; OSI-774; erlotinibum; Erlotinib Base; UNII-J4T82NDH7E; N-(3-Ethynylphenyl)-6,7-bis(2-methoxyethoxy)-4-quinazolinamine; J4T82NDH7E; Erl…	AAKJLRGGTJKAMG-UHFFFAOYSA-N	CHEMBL553	ERLOTINIB	Others	Others	Autophagy; EGFR; Others; Others	Epidermal growth factor receptor	EGFR	https://pubchem.ncbi.nlm.nih.gov/compound/Erlotinib#section=Mechanism-of-Action	hsa04012	Tyrosine kinase	EGFR	Autophagy
M92241	O	20	50	10	DMSO	5578-73-4	T0129	Sanguinarine chloride	Sanguinarium chloride; Pseudochelerythrine chloride	[Cl-].C[n+]1c2c3cc4c(OCO4)cc3ccc2c2ccc3c(OCO3)c2c1	C20H14ClNO4	367.78	Angiogenesis; Apoptosis; Autophagy; JAK/STAT signaling; Microbiology/virology; Tyrosine Kinase/Adaptors	Antibacterial; Apoptosis; Autophagy; EGFR; Parasite; VEGFR	Apoptosis; Autophagy; Bacterial; Parasite; Egr-1; VEGFR	Sanguinarine chloride, a benzophenanthridine alkaloid, stimulates apoptosis by activating the production of reactive oxygen species (ROS).	Han MH, et al.Toxicol Lett. 2013 Jul 4;220(2):157-66.	68635	SANGUINARINE CHLORIDE; 5578-73-4; Sanguinarium Chloride; Viadent; Sanguinarine chloride hydrate; Sanguinarine hydrochloride; Sanguinarine (chloride); Sanguinarine, chloride; Sanguinarium chloride [USAN:INN]; [1,3]Benzodioxolo[5,6-c]-1,3-dioxolo[4,5-i]phenanthridinium,13-methyl-, chloride (1:1); C20H14NO4.Cl; UNII-B8Z8J4400H; CHEMBL490129; 5578-73-4 (chloride); B8Z8J4400H; Pseudochelerythrine chlo…	GIZKAXHWLRYMLE-UHFFFAOYSA-M	CHEMBL490129	SANGUINARIUM CHLORIDE	Others	Others	Antibacterial; Apoptosis; Autophagy; EGFR; Parasite; VEGFR; Others; Others	c-Jun N-terminal kinase (JNK) and nuclear factor kappa-light-chain-enhancer of activated B cells (NF-ÎºB)	JNK/NF-ÎºB	Ahsan H, Reagan-Shaw S, Eggert DM, Tan TC, Afaq F, Mukhtar H, Ahmad N. "Sanguinarine (pseudochelerythrine) is a potent inhibitor of NF-kB activation, IkBa phosphorylation, and translocation of p65 by direct inhibition of IkBa kinase beta." Molecular Pharmacology. 2007 Dec;72(6):1461-9. Epub 2007 Sep 13.	hsa04010 (for NF-ÎºB signaling pathway) AND hsa04064 (for NF-kappa B signaling pathway)	kinase and transcription factor modulator	JNK	Antibacterial
M92241	O	21	50	10	DMSO	17692-31-8	T0452	Dropropizine	UCB-196; (Â±)-Dropropizine; UCB-1967	OCC(O)CN1CCN(CC1)c1ccccc1	C13H20N2O2	236.31	Others	Others	Others	Dropropizine, a racemic non-opiate antitussive agent, is served as a cough suppressant.	Nosalova G, et al. Acta Vet. Brno, 2007, 76, 27-33.	3169	dropropizine; 17692-31-8; 3-(4-phenylpiperazin-1-yl)propane-1,2-diol; Dipropizine; Ditustat; Catabex; Larylin; Tussilex; Katril; Ribex; (+/-)-DROPROPIZINE; Dopropizin; (+-)-Dropropizine; 3-(4-Phenyl-1-piperazinyl)-1,2-propanediol; Dropropizina; Dropropizinum; 1,2-Propanediol, 3-(4-phenyl-1-piperazinyl)-; Dropropizinum [INN-Latin]; Dropropizina [INN-Spanish]; Dropropizine [INN:BAN:DCF]; CCRIS 3154…	PTVWPYVOOKLBCG-UHFFFAOYSA-N	CHEMBL151445	DROPROPIZINE	Others	Others	Others; Others; Others						Others	Others
M92241	O	22	50	10	DMSO	57-64-7	T0130	Physostigmine Salicylate		OC(=O)c1ccccc1O.CNC(=O)Oc1cc2c(cc1)N(C)[C@H]1N(C)CC[C@@]21C	C22H27N3O5	413.48	Neuroscience	AChR	AChE; AChR	Physostigmine, a parasympathomimetic alkaloid, is a reversible cholinesterase inhibitor. It extracts from the Calabar bean.	Lim DK, et al. Pharmacol Biochem Behav. 1988 Nov;31(3):627-31.	657348	Physostigmine salicylate; 57-64-7; Eserine salicylate; Isopto Eserine; Physostigmine (salicylate); Physostigmine monosalicylate; Physostol salicylate; NSC-757275; 57-64-7 (salicylate); UNII-2046ZRO9VU; MLS000028388; 2046ZRO9VU; CCRIS 3405; Physostigmine salicylate [JAN]; CHEBI:48883; Physostigmine, salicylate (1:1); AR-44; EINECS 200-343-8; Physostigmine salicylate [USP:JAN]; TL-1380; SMR00005860…	HZOTZTANVBDFOF-PBCQUBLHSA-N	CHEMBL338975	PHYSOSTIGMINE SALICYLATE	Others	Others	AChR; Others; Others	Acetylcholinesterase	AChE	https://pubchem.ncbi.nlm.nih.gov/compound/Physostigmine-salicylate#section=Mechanism-of-Action	hsa00564	Enzyme	AChE	AChR
M92241	P	3	50	10	DMSO	33402-03-8	T0279	Metaraminol bitartrate	Metaradrine tartrate	O[C@H]([C@@H](O)C(O)=O)C(O)=O.C[C@H](N)[C@H](O)c1cccc(O)c1	C13H19NO8	317.29	GPCR/G Protein; Neuroscience	Adrenergic Receptor	Adrenergic Receptor; Î±-adrenergic receptor	Metaraminol bitartrate is a sympathomimetic agent that acts predominantly at alpha-1 adrenergic receptors. It has been used primarily as a vasoconstrictor in the treatment of HYPOTENSION.	Tatsuta M, et al. Int J Y. 1998 Jul 29;77(3):467-9.	441414	Metaraminol bitartrate; 33402-03-8; Aramine; Araminum; Metaraminol (+)-bitartrate salt; Levicor; Metaramin; Levicor ampullen; Araminum ampullen; (-)-Metaraminol bitartrate; l-Metraminol bitartrate; Metaraminol (tartrate); Aramine (sympathominetic); Metaraminol Tartrate; Pressorol; Metaraminol tartrate (1:1); UNII-ZC4202M9P3; IMS metaraminol bitartrat ampullen; Metaraminol (R,R)-hydrogentartrat; M…	VENXSELNXQXCNT-IJYXXVHRSA-N			Others	Others	Adrenergic Receptor; Others; Others	Adrenergic Receptor	AR	"Drugs.com. Metaraminol. Available from: https://www.drugs.com/ppa/metaraminol.html"	hsa04080	G-protein coupled receptor	Adrenergic_Receptor	Adrenergic Receptor
M92241	P	4	50	10	DMSO	417716-92-8	T0520	Lenvatinib	E7080	COc1cc2nccc(Oc3cc(Cl)c(NC(=O)NC4CC4)cc3)c2cc1C(=O)N	C21H19ClN4O4	426.85	Angiogenesis; Apoptosis; Tyrosine Kinase/Adaptors	c-Kit; c-RET; FGFR; PDGFR; VEGFR	FGFR1; PDGFRÎ²; VEGFR1/FLT1; VEGFR2/KDR; VEGFR3/FLT4; VEGFR; FGFR; PDGFR; c-Kit; RET	Lenvatinib is a Kinase Inhibitor. The mechanism of action of lenvatinib is as a Receptor Tyrosine Kinase Inhibitor.	Matsui J, et al. Int J Cancer. 2008, 122(3), 664-671.	9823820	Lenvatinib; 417716-92-8; E7080; Lenvima; 4-(3-chloro-4-(3-cyclopropylureido)phenoxy)-7-methoxyquinoline-6-carboxamide; E7080 (Lenvatinib); Lenvatinib (E7080); E-7080; E 7080; ER-203492-00; Lenvatinib free base; 4-{3-Chloro-4-[(Cyclopropylcarbamoyl)amino]phenoxy}-7-Methoxyquinoline-6-Carboxamide; Lenvatinib [USAN]; 4-[3-Chloro-4-(cyclopropylaminocarbonyl)aminophenoxy]-7-methoxy-6-quinolinecarboxam…	WOSKHXYHFSIKNG-UHFFFAOYSA-N	CHEMBL1289601	LENVATINIB	Others	Others	c-Kit; c-RET; FGFR; PDGFR; VEGFR; Others; Others	Vascular endothelial growth factor receptors (VEGFR1, VEGFR2, VEGFR3), fibroblast growth factor receptors (FGFR1, FGFR2, FGFR3, FGFR4), platelet-derived growth factor receptor alpha (PDGFRÎ±), RET, and KIT	VEGFR, FGFR, PDGFR, RET, KIT	Matsui J, Funahashi Y, Uenaka T, Watanabe T, Tsuruoka A, Asada M. "Multi-kinase inhibitor E7080 suppresses lymph node and lung metastases of human mammary breast tumor MDA-MB-231 via inhibition of vascular endothelial growth factor-receptor (VEGF-R) 2 and VEGF-R3 kinase." Clinical Cancer Research : An Official Journal of the American Association for Cancer Research. 2008 Sep 15;14(18):5459-65. DO…	hsa04010 (MAPK signaling pathway), hsa05200 (Pathways in cancer)	Kinase	VEGFR	c-Kit
M92241	P	5	50	10	DMSO	749-02-0	T0280	Spiperone	Spiroperidol; Spiropitan	Fc1ccc(cc1)C(=O)CCCN1CCC2(CC1)N(CNC2=O)c1ccccc1	C23H26FN3O2	395.47	GPCR/G Protein; Neuroscience	Dopamine Receptor	Dopamine	Spiperone is a spiro butyrophenone analog similar to HALOPERIDOL and other related compounds. It has been recommended in the treatment of SCHIZOPHRENIA.	Zheng LT, et al.J Neurochem. 2008 Dec;107(5):1225-35.	5265	spiperone; Spiropitan; 749-02-0; Spiroperidol; Espiperona; Spiperonum; R 5147; [3H]spiperone; [3H]-spiperone; Spiroperidone; Spiperonum [INN-Latin]; Espiperona [INN-Spanish]; E 525; NSC 170983; 8-[4-(4-fluorophenyl)-4-oxobutyl]-1-phenyl-1,3,8-triazaspiro[4.5]decan-4-one; MLS000028615; C23H26FN3O2; Spiperone [USAN:INN:BAN:JAN]; Spiroperidol;R-5147; 8-(3-(p-Fluorobenzoyl)propyl)-1-phenyl-1,3,8-tria…	DKGZKTPJOSAWFA-UHFFFAOYSA-N	CHEMBL267930	SPIPERONE	Others	Others	Dopamine Receptor; Others; Others	Dopamine D2 receptor	DRD2	https://pubchem.ncbi.nlm.nih.gov/compound/Spiperone#section=Pharmacology-and-Biochemistry	hsa04080	G protein-coupled receptor	Dopamine	Dopamine Receptor
M92241	P	6	50	10	DMSO	79165-06-3	T0522	Diammonium Glycyrrhizinate	Glycyrrhizin	N.N.C[C@]12CC[C@@](C)(C[C@H]1C1=CC(=O)[C@@H]3[C@@]4(C)CC[C@H](O[C@H]5O[C@@H]([C@@H](O)[C@H](O)[C@H]5O[C@@H]5O[C@@H]([C@@H](O)[C@H](O)[C@H]5O)C(O)=O)C(O)=O)C(C)(C)[C@@H]4CC[C@@]3(C)[C@]1(C)CC2)C(O)=O	C42H62O16Â·2H3N	857	Metabolism	Dehydrogenase	11-beta-hydroxysteroid dehydrogenase	Diammonium glycyrrhizinate, an extensively used anti-inflammatory agent, is isolated from the licorice root. It is metabolized to glycyrrhetinic acid, which inhibits 11-Î²-hydroxysteroid dehydrogenase and other enzymes involved in the metabolism of corticosteroids. Therefore, glycyrrhizic acid, the main and sweet component of licorice, has been studied for its ability to cause hypermineralocortic…	Jin J, et al. Food Chem Toxicol. 2014 Nov;73:95-104.	656656	Diammonium glycyrrhizinate; 79165-06-3; UNII-A9ZZD585U6; A9ZZD585U6; Glycyrrhizic acid, diammonium salt; 18beta-Glycyrrhizic acid diammonium salt; 53956-04-0; Glycyrrhizic acid ammonium salt; Diammonium glycyrrhizinate (JAN); (2S,3S,4S,5R,6R)-6-[(2S,3R,4S,5S,6S)-2-[[(3S,4aR,6aR,6bS,8aS,11S,12aR,14aR,14bS)-11-carboxy-4,4,6a,6b,8a,11,14b-heptamethyl-14-oxo-2,3,4a,5,6,7,8,9,10,12,12a,14a-dodecahydro…	SPPIIOPGDLITJE-VLQRKCJKSA-N			Others	Others	Dehydrogenase; Others; Others						Steroid_Biosynthesis	Dehydrogenase
M92241	P	7	50	10	DMSO	127-48-0	T0283	Trimethadione	3,5,5,-Trimethyloxazolidine-2,4-dione	CN1C(=O)OC(C)(C)C1=O	C6H9NO3	143.14	Membrane transporter/Ion channel; Metabolism	Calcium Channel	Calcium Channel	Trimethadione is a dione-type anticonvulsant with antiepileptic activity.	Shen H, et al. Hear Res. 2007 Apr;226(1-2):52-60.	5576	trimethadione; 127-48-0; Tridione; Troxidone; Trimethadion; Trimetadione; Absentol; Epidione; Trimetin; Minoaleviatin; Convenixa; Convexina; Petidion; Petimalin; Tioxanona; Tridilona; Trimedal; Trimethin; Trioxanona; Absetil; Epixal; Petidon; Petilep; Ptimal; Tridion; Edion; Tridone; Trimethdione; 3,5,5-Trimethyloxazolidine-2,4-dione; Minoaleuiatin; Trimethadionum; 3,5,5-Trimethyl-1,3-oxazolidine…	IRYJRGCIQBGHIV-UHFFFAOYSA-N	CHEMBL695	TRIMETHADIONE	Others	Others	Calcium Channel; Others; Others	Voltage-gated T-type calcium channels	CACNA1H	https://pubchem.ncbi.nlm.nih.gov/compound/Trimethadione#section=Pharmacology-and-Biochemistry	hsa04020	Ion channel	VDAC	Calcium Channel
M92241	P	8	50	10	DMSO	65182-56-1	T2168	2-NP		Oc1ccccc1c1ccc2cccnc2n1	C14H10N2O	222.24	JAK/STAT signaling; Stem Cells	STAT	STAT1	2-NP is a STAT1 enhancer.	Lynch RA, et al. Y Res. 2007 Feb 1;67(3):1254-61.	2761113	2-(1,8-Naphthyridin-2-yl)phenol; 65182-56-1; Phenol,2-(1,8-naphthyridin-2-yl)-; 2-(1,8-naphthyridin-2-yl)-phenol; Peakdale1_000318; 6-(1H-1,8-naphthyridin-2-ylidene)cyclohexa-2,4-dien-1-one; 4-CHLOROPHENYLSULFOXIDE; SCHEMBL1977339; HMS518O10; DTXSID00425411; 2-(1,8-naphthyridin-2-ly)phenol; (6Z)-6-(1H-1,8-naphthyridin-2-ylidene)cyclohexa-2,4-dien-1-one; MFCD00203050; AKOS015854268; AKOS026750373;…	AYKMXKNVEUMLFQ-UHFFFAOYSA-N			Others	Others	STAT; Others; Others						STAT	STAT
M92241	P	9	50	10	DMSO	1321-14-8	T0284	Sulfogaiacol	guaiacolsulfonate	[K+].COc1c(O)ccc(c1)S(=O)(=O)[O-]	C7H7KO5S	242.29	Microbiology/virology	Antibacterial	Bacterial	Sulfogaiacol is an antitussive agent, used for acute respiratory tract infections and cough.	Armand C, et al. Therapie. 2004 Sep-Oct;59(5):547-53.	23679005	Potassium 4-Hydroxy-3-methoxybenzenesulfonate; 16241-25-1; potassium 4-hydroxy-3-methoxybenzene-1-sulfonate; Sulfogaiacol; Potassium 4-guaiacolsulfonate; Potassium 4-guaiacolsulfonate [MI]; Guaiacolsulfonic Acid Potassium Salt; Monopotassium 4-hydroxy-3-methoxybenzenesulfonate; Monopotassium 4-hydroxy-3-methoxybenzenesulphonate; UNII-ZL9GA44H2A; ZL9GA44H2A; 4-Hydroxy-3-methyoxybenzenesulfonic aci…	QFRKWSPTCBGLSU-UHFFFAOYSA-M			Others	Others	Antibacterial; Others; Others						Antibacterial	Antibacterial
M92241	P	10	50	10	DMSO	531-75-9	T2885	Esculin	Aesculin	c1cc(=O)oc2cc(c(cc12)O[C@H]1[C@@H]([C@H]([C@@H]([C@H](O1)CO)O)O)O)O	C15H16O9	340.28	Immunology/Inflammation; MAPK; Microbiology/virology	Antibacterial; Antiviral; p38 MAPK	Antibacterial; Antiviral; p38 MAPK	Esculin is a glucoside found in horse chestnuts.	Mokdad-Bzeouich I, et al. J Antibiot (Tokyo). 2015 Mar;68(3):148-52.	5281417	Esculin; aesculin; 531-75-9; Esculoside; Bicolorin; Enallachrome; Escosyl; (-)-Esculin; 6,7-Dihydroxycoumarin 6-glucoside; Esculetin 6-O-glucoside; Aesculinum; Crataegin; Esculine; Venoplant; Esculetin 6-beta-D-glucoside; 6,7-Dihydroxycoumarin-6-O-glucoside; Vitamin C2; Aesculetin glukosid; CHEBI:4853; Esculina; 7-Hydroxy-6-cumarinyl-glucosid; 6-(beta-D-Glucopyranosyloxy)-7-hydroxy-cumarin; escul…	XHCADAYNFIFUHF-TVKJYDDYSA-N	CHEMBL482581	ESCULIN	Others	Others	Antibacterial; Antiviral; p38 MAPK; Others; Others	p38 MAP kinase	p38 MAPK	Sheikh, B.Y., Sarker, M.M.R., Kamarudin, M.N.A., & Ismail, A. "Prophetic Medicine as Potential Functional Food Elements in the Intervention of Cancer: A Review." Biomedicine & Pharmacotherapy, 95 (2017): 614-648. https://doi.org/10.1016/j.biopha.2017.08.091	hsa04010	Kinase	MAPK	Antibacterial
M92241	P	11	50	10	DMSO	34552-84-6	T0285	Isoxicam	Maxicam; Isoxicamo; Isoxicamum	CN1C(=C(O)c2ccccc2S1(=O)=O)C(=O)Nc1noc(C)c1	C14H13N3O5S	335.34	Immunology/Inflammation; Neuroscience	COX	COX	Isoxicam is a non-steroidal anti-inflammatory drug that is not marketed in the United States.	Burch FX. Am J Med. 1985 Oct 18;79(4B):28-32.	54677972	isoxicam; 34552-84-6; Maxicam; Isoxicamum; Isoxicamo; Pacyl; W 8495; Pacyl (antiinflammatory); Isoxicamum [INN-Latin]; Isoxicamo [INN-Spanish]; EINECS 252-084-5; UNII-8XU734C4NG; BRN 0577221; CHEBI:76163; NSC-758436; floxicam; Isoxicam [USAN:BAN:INN]; Isoxicam [USAN:INN:BAN]; 8XU734C4NG; DTXSID0045462; W-8495; 2H-1,2-Benzothiazine-3-carboxamide, 4-hydroxy-2-methyl-N-(5-methyl-3-isoxazolyl)-, 1,1-…	YYUAYBYLJSNDCX-UHFFFAOYSA-N	CHEMBL53292	ISOXICAM	Others	Others	COX; Others; Others	Cyclooxygenases (COX-1 and COX-2)	COX	Vane, J.R., Botting, R.M. "Anti-inflammatory drugs and their mechanism of action." Inflammation Research 47 (1998): S78-S87. https://pubmed.ncbi.nlm.nih.gov/9788304/	hsa00590 (Arachidonic acid metabolism)	Enzyme	COX	COX
M92241	P	12	50	10	DMSO	57-71-6	T2176	2,3-Butanedione 2-Monoxime	2,3-Butanedione-2-monoxime; Diacetyl monoxime	CC(=O)/C(=N/O)/C	C4H7NO2	101.11	Cytoskeletal Signaling; PI3K/Akt/mTOR signaling	Akt	Akt	2, 3-Butanedione 2-Monoxime is an inhibitor of skeletal and cardiac muscle contraction.	Vyomesh Patel, et al. Y Res, 2002, 62(5), 1401-1409	6398997	57-71-6; 3-(hydroxyimino)butan-2-one; 2,3-butanedionmonoxim; 2 3-Butadione monooxime; 2 3-Butanedione monoxime; 2-Hydroxyimino-3-butanone; 2,3-butanodiona, 2-oxima; Butane-2,3-dione monooxime; 2 3-Butanedione 3-monoxime; 2 3-Butanedione-2-monoxime; 2,3-Butanedione 2-Monoxime; 3-(Hydroxyimino)-2-butanone; 2 3-Butanedione oxime (6CI); RA 53; 2 3-Butanedione monooxime (8CI 9CI); (3Z)-3-(HYDROXYIMINO…	FSEUPUDHEBLWJY-HYXAFXHYSA-N	CHEMBL335741		Others	Others	Akt; Others; Others						AKT	Akt
M92241	P	13	50	10	DMSO	3818-50-6	T0286	Bephenium Hydroxynaphthoate		Oc1cc2ccccc2cc1C([O-])=O.C[N+](C)(CCOc1ccccc1)Cc1ccccc1	C28H29NO4	443.53	Microbiology/virology	Parasite	Parasite	Bephenium hydroxynaphthoate is a B-type AChR activator, formerly used in the treatment of hookworm infections and ascariasis.	MEHROTRA MP, MALAVIYA US. Indian J Med Sci. 1963 Dec;17:930-3.	54678490	BEPHENIUM HYDROXYNAPHTHOATE; 3818-50-6; Naphthammonum; Bephenium (hydroxynaphthoate); Alcopar; bephenium embonate; Debefenium; Naphtamone; Naphthammon; Alcopara; Befeniol; Befenium; Frantin; Lecibis; Naftamon; Naphtamon; Befen; Bephenii hydroxynaphthoas; Fedal-uncin; Hydorxynaphtoate de bephenium; Bephene oxinaphtoate; Hidroxinaftoato de befenio; Bephenamine hydroxynaphthoate; UNII-47RU9546DX; Be…	PMPQCPQAHTXCDK-UHFFFAOYSA-M	CHEMBL1673148	BEPHENIUM HYDROXYNAPHTHOATE	Others	Others	Parasite; Others; Others						Parasite	Parasite
M92241	P	14	50	10	DMSO	482-89-3	T2847	Indigo	Indigotin	O=C1c2ccccc2N\C1=C1\Nc2ccccc2C1=O	C16H10O2N2	262.26	Others	Others	Others	Indigo is extracted from Indigo blue.	Margetis K, et al. J Neurosurg. 2015 Jan;122(1):40-8.	10215	INDIGO; 482-89-3; Indigotin; Indigo Blue; Vat blue 1; Cystoceva; Diindogen; Vulcafix Blue R; Indigo Pure BASF; Indigo Ciba; Indigo Synthetic; Synthetic Indigo; Indigo J; Indigo N; Indigo P; Indigo Powder W; Vulcafor Blue A; Vynamon Blue A; Indigo VS; Indigo Ciba SL; Indigo NAC; Indigo PLN; Indigo NACCO; C.I. Vat Blue 1; Mitsui Indigo Pure; Mitsui Indigo Paste; indigo dye; Synthetic Indigo TS; Vul…	QQILFGKZUJYXGS-UHFFFAOYSA-N	CHEMBL35479		Others	Others	Others; Others; Others						Others	Others
M92241	P	15	50	10	DMSO	55-97-0	T0287	Hexamethonium Bromide	Hexamethonium Dibromide; Simpatoblock; Gangliostat	C[N+](C)(CCCCCC[N+](C)(C)C)C.[Br-].[Br-]	C12H30Br2N2	362.19	Apoptosis; GPCR/G Protein; Neuroscience	AChR; Apoptosis; Dopamine Receptor	mAChR; Dopamine; nAChR; Apoptosis	Hexamethonium Bromide, a specific antagonist of neuronal-type nicotinic AChR in ganglia, is poorly absorbed from the gastrointestinal tract and does not cross the blood-brain barrier.	Rang HP, et al. Br J Pharmacol, 1984, 81(3), 519-531.	5938	HEXAMETHONIUM BROMIDE; 55-97-0; Simpatoblock; Hexamethonium dibromide; Gangliostat; Bistrium bromide; Esametina; Hexameton; Vegolysen; Vegolysin; Hexamethionium bromide; Hexamethonium (Bromide); Hexonium dibromide; Esametonio bromuro; Esametonio bromuro [DCIT]; Hexamethonium (dibromure d'); Hexamethonii bromidum; 1,6-Hexanediaminium, N,N,N,N',N',N'-hexamethyl-, dibromide; C12H30N2.2Br; Bromuro de…	FAPSXSAPXXJTOU-UHFFFAOYSA-L	CHEMBL332524	HEXAMETHONIUM BROMIDE	Others	Others	AChR; Apoptosis; Dopamine Receptor; Others; Others	Nicotinic acetylcholine receptor	AChR	Morita K, North RA. "Nicotinic responses of rat locus coeruleus neurons." Neuroscience Letters 197.1 (1995): 1-4.	hsa04080	Ion channel	AChR	AChR
M92241	P	16	50	10	DMSO	617-05-0	T2929	Ethyl Vanillate	Bourbonal; Ethylprotal	CCOC(=O)c1cc(OC)c(O)cc1	C10H12O4	196.2	Microbiology/virology; oxidation-reduction	Antifungal; Antioxidant	antioxidant; Fungal	Ethyl vanillin, a vanillin analog, is a flavoring agent that exhibits strong antioxidant activity.	Namazi MR Md, Shotorbani AK Md. Iran J Med Sci. 2015 Nov;40(6):478-84.	12038	Ethyl vanillate; Ethyl 4-hydroxy-3-methoxybenzoate; 617-05-0; 4-Hydroxy-3-methoxybenzoic acid ethyl ester; VANILLIC ACID, ETHYL ESTER; Benzoic acid, 4-hydroxy-3-methoxy-, ethyl ester; 3-Methoxy-4-hydroxybenzoic acid, ethyl ester; m-Anisic acid, 4-hydroxy-, ethyl ester; NSC 8513; EINECS 210-503-9; BRN 2100025; UNII-V38JK4Z93O; AI3-06151; V38JK4Z93O; CHEMBL4206971; NSC-8513; MFCD00017269; 3-10-00-0…	MWAYRGBWOVHDDZ-UHFFFAOYSA-N	CHEMBL4206971		Others	Others	Antifungal; Antioxidant; Others; Others						Antifungal	Antifungal
M92241	P	17	50	10	DMSO	23249-97-0	T0288	Procodazole	2-Benzimidazolepropionic acid; Propazol	OC(=O)CCc1nc2ccccc2[nH]1	C10H10N2O2	190.2	Microbiology/virology	Antibacterial	Antibacterial; Bacterial	Procodazole is a non-specific active immunoprotective agent against viral and bacterial infections.	A. ROMASANTA, et al. Antibody-mediated response in dogs experimentally infected withÂ Toxocara canis: effect of procodazole. HELMINTHOLOGIA, 41, 1:3-7, 2004.	65708	Procodazole; 23249-97-0; 2-Benzimidazolepropionic acid; 3-(1H-Benzimidazol-2-yl)propanoic acid; Propazol; 1H-Benzimidazole-2-propanoic acid; Procodazol; Estimulocel; Procodazole [INN]; Propazole; 3-(1H-benzo[d]imidazol-2-yl)propanoic acid; Procodazolum; 2-(2-Carboxyethyl)benzimidazole; Procodazol [INN-Spanish]; Procodazolum [INN-Latin]; NSC35790; NSC 35790; NSC-35790; 3-(1H-1,3-Benzodiazol-2-Yl)P…	XYWJNTOURDMTPI-UHFFFAOYSA-N	CHEMBL596009	PROCODAZOLE	Others	Others	Antibacterial; Others; Others						Antibacterial	Antibacterial
M92241	P	18	50	10	DMSO	487-26-3	T0530	Flavanone	2,3-Dihydroflavone; 4-Flavanone; 2-Phenyl-4-chromanone; 2-Phenylchroman-4-one	O=C1CC(Oc2ccccc12)c1ccccc1	C15H12O2	224.26	Endocrinology/Hormones	Aromatase	Aromatase	Flavanones from citrus fruits have also been shown to exert beneficial effects on human vascular function. In particular, chronic interventions with orange juice, or the pure flavanone hesperidin, resulted in a decrease in blood pressure in overweight volunteers and acute improvements in microvascular reactivity.	Kean RJ, et al. Am J Clin Nutr. 2015 Mar; 101(3):506-14.	10251	FLAVANONE; 487-26-3; 2-Phenylchroman-4-one; 2,3-Dihydroflavone; 4-Flavanone; 2-Phenyl-4-chromanone; 2,3-Dihydro-2-phenyl-4H-1-benzopyran-4-one; NSC-50393; 2,3-Dihydro-2-phenyl-4H-benzopyran-4-one; 4H-1-Benzopyran-4-one, 2,3-dihydro-2-phenyl-; 2-Phenylchromanone; 2-Phenyl-2,3-dihydro-4H-chromen-4-one; EINECS 207-654-8; NSC 50393; BRN 0183227; UNII-WX22P730FB; MLS002667384; CHEBI:5070; CHEMBL274318…	ZONYXWQDUYMKFB-UHFFFAOYSA-N	CHEMBL274318	FLAVANONE	Others	Others	Aromatase; Others; Others	Aromatase	CYP19A1	https://pubmed.ncbi.nlm.nih.gov/17582751/	hsa00140	enzyme	Aromatase	Aromatase
M92241	P	19	50	10	DMSO	90-45-9	T0289	Aminacrine	9-Aminoacridine	NC1=C(C=CC=C2)C2=NC3=CC=CC=C31	C13H10N2	194.23	Microbiology/virology; Proteases/Proteasome	Antibacterial; HIV Protease	HIV; Bacterial	9-Aminoacridine is a highly fluorescent anti-infective dye used clinically as a topical antiseptic and experimentally as a mutagen, due to its interaction with DNA. It is also used as an intracellular pH indicator.	Ju W, et al. Retrovirology. 2014 Jun 2;11:43.	7019	9-AMINOACRIDINE; Aminacrine; 90-45-9; Acridin-9-amine; 9-Acridinamine; Aminoacridine; Aminacrin; Monacrin; Izoacridina; 10-Amino-5-azaanthracene; 9-Acridinylamine; Aminoacridina; Aminoacridinum; 9-Aminoakridin; Acridine, 9-amino-; Aminopt; Mykocert; 9-Aminoacridin; 9-Aminoakridin [Czech]; Aminoacridine [INN:BAN]; C13H10N2; 9AA; NSC 13000; CCRIS 748; Acridin-9-ylamine; NSC 7571; EINECS 201-995-6; …	XJGFWWJLMVZSIG-UHFFFAOYSA-N	CHEMBL43184	AMINACRINE	Others	Others	Antibacterial; HIV Protease; Others; Others	Topoisomerase II	TOP2	https://www.sciencedirect.com/topics/neuroscience/aminacrine	hsa03030	Enzyme	Topoisomerase	Antibacterial
M92241	P	20	50	10	DMSO	2471-70-7	T0556	6-Methoxy-2-naphthoic acid	Naproxen impurity O; 6-Methoxy-2-naphthalenecarboxylic acid	COC1=CC2=C(C=C1)C=C(C=C2)C(=O)O	C12H10O3	202.21	Membrane Transporter/Ion Channel; Neuroscience	iGluR; NMDAR	iGluR; NMDA receptor	6-Methoxy-2-naphthoic acid is an modulator of NMDAR.	Narayana B, et al. Arch Pharm (Weinheim). 2005 Aug;338(8):373-7.	349181	6-Methoxy-2-naphthoic acid; 2471-70-7; 6-methoxynaphthalene-2-carboxylic acid; 2-Naphthalenecarboxylic acid, 6-methoxy-; Naproxen Impurity O; 6-Methoxy-2-naphthalenecarboxylic acid; NSC-408786; 2-Methoxy-6-naphthalenecarboxylic acid; UNII-65IH1SV66A; 65IH1SV66A; Naproxen specified impurity O [EP]; MFCD00092750; 6-Methoxynaphthalene-2-carboxylic Acid (6-Methoxy-2-naphthoic Acid; 2-Carboxy-6-methox…	YZBILXXOZFORFE-UHFFFAOYSA-N	CHEMBL1510822		Others	Others	iGluR; NMDAR; Others; Others						iGluR	iGluR
M92241	P	21	50	10	DMSO	64461-82-1	T0290	Tizanidine hydrochloride	Tizanidine HCl; DS 103-282	Cl.Clc1c(NC2=NCCN2)c2nsnc2cc1	C9H9Cl2N5S	290.17	GPCR/G Protein; Neuroscience	Adrenergic Receptor	Adrenergic Receptor; Î±2 adrenergic receptor	Tizanidine hydrochloride, an Î±2-adrenergic receptor agonist, inhibits neurotransmitter release from CNS noradrenergic neurons.	Piletz JE, et al. J Pharmacol Exp Ther. 1996 Nov;279(2):694-702.	114869	Tizanidine hydrochloride; Tizanidine Hcl; 64461-82-1; Zanaflex; Tizanidine (hydrochloride); 5-Chloro-N-(4,5-dihydro-1H-imidazol-2-yl)-2,1,3-benzothiadiazol-4-amine hydrochloride; DS 103-282; 5-chloro-N-(4,5-dihydro-1H-imidazol-2-yl)benzo[c][1,2,5]thiadiazol-4-amine hydrochloride; AN021; UNII-B53E3NMY5C; B53E3NMY5C; Tizanidine (as hydrochloride); 5-Chloro-4-(2-imidazolin-2-ylamino)-2,1,3-benzothia…	ZWUKMNZJRDGCTQ-UHFFFAOYSA-N	CHEMBL1200329	TIZANIDINE HYDROCHLORIDE	Others	Others	Adrenergic Receptor; Others; Others	alpha-2 adrenergic receptor	ADRA2	https://pubchem.ncbi.nlm.nih.gov/compound/Tizanidine-hydrochloride#section=Mechanism-of-Action&fullscreen=true	hsa04080	G protein-coupled receptor	Adrenergic_Receptor	Adrenergic Receptor
M92241	P	22	50	10	DMSO	20600-44-6	T0577	Chlorobenzothiazolinone		Clc1cc2c(sc(=O)[nH]2)cc1	C7H4ClNOS	185.63	Others	others	recombinant human chymase	Chlorobenzothiazolinone inhibits recombinant human chymase using bis(succinoyl-L-alanyl-L-prolyl-L-phenylalanylamide) as substrate after 1 hr by fluorescence assay with activity value of 90 Î¼M.		603829	5-Chloro-2-benzothiazolinone; 20600-44-6; 5-chlorobenzo[d]thiazol-2(3H)-one; 5-chloro-3H-1,3-benzothiazol-2-one; 2(3H)-Benzothiazolone, 5-chloro-; 5-CHLOROBENZOTHIAZOLONE; 5-Chloro-1,3-benzothiazol-2(3H)-one; Chlorobenzothiazolinone; 95%; 2-Benzothiazolol, 5-chloro-; Chlorobenzothiazolinone; 5-Chloro-2-benzothiazolone; CHEMBL2381489; 5-Chloro-2(3H)-benzothiazolone; 5-chloro-2,3-dihydro-1,3-benzot…	NOVHYVKPKWACML-UHFFFAOYSA-N	CHEMBL2381489		Others	Others	others; Others; Others						Others	others
M92242	A	3	50	10	DMSO	15905-32-5	T0578	Erythrosin B	Iodeosin; Tetraiodofluorescein	Oc1c(I)cc2c(Oc3c(I)c(O)c(I)cc3C32OC(=O)c2ccccc32)c1I	C20H8I4O5	835.89	Others	Others	Others	Iodeosin, a tetraiodofluorescein, is used as a red coloring in some foods (cherries, fish), as a stain of some cell types, and as a disclosure of DENTAL PLAQUE. Its molecular structure is similar to THYROXINE.	Horikoshi S, et al. Clin Chim Acta. 2012 Jul 11;413(13-14):1087-91.	3259	Erythrosin B; Tetraiodofluorescein; 15905-32-5; Iodeosin; Solvent Red 140; Erythrosine acid; ERYTHROSINE; Erythrosine, phenolic; 2',4',5',7'-Tetraiodofluorescein; 2,4,5,7-Erythrosin; E127; C20H8I4O5; EINECS 240-046-0; NSC 328781; C.I. Solvent Red 140; BRN 0062817; UNII-1A878FZQ9B; 3',6'-dihydroxy-2',4',5',7'-tetraiodospiro[2-benzofuran-3,9'-xanthene]-1-one; 1A878FZQ9B; DTXSID7044843; NSC-328781; …	OALHHIHQOFIMEF-UHFFFAOYSA-N	CHEMBL1332616	ERYTHROSINE	Others	Others	Others; Others; Others						Others	Others
M92242	A	4	50	10	DMSO	139264-17-8	T1092	Zolmitriptan	BW-311C90; 311C90	c12c([nH]cc1CCN(C)C)ccc(c2)C[C@@H]1NC(=O)OC1	C16H21N3O2	287.36	GPCR/G Protein; Neuroscience	5-HT Receptor	5-HT; 5-HT Receptor	Zolmitriptan selectively binds to and activates serotonin (5-HT) 1B receptors expressed in intracranial arteries and 5-HT 1D receptors located on peripheral trigeminal sensory nerve terminals in the meninges and central terminals in brainstem sensory nuclei. Zolmitriptan is a member of the triptan class of agents with anti-migraine properties. Receptor binding results in constriction of cranial v…	Martin GR, et al. Br J Pharmacol,1997, 121(2), 157-164.	60857	zolmitriptan; 139264-17-8; Zomig; Zomigoro; 311C90; Zomigon; Flezol; Zomig-ZMT; Zomig Nasal Spray; Zomig ZMT; Zolmitriptan [USAN]; AscoTop; (S)-4-((3-(2-(dimethylamino)ethyl)-1H-indol-5-yl)methyl)oxazolidin-2-one; zipton; zolmitriptane; zolmitriptanum; zominat; Rapimelt; C16H21N3O2; BW-311C90; Zomig (TN); Zolmitriptan RapidFilm; (S)-4-[3-(2-Dimethylamino-ethyl)-1H-indol-5-ylmethyl]-oxazolidin-2-o…	ULSDMUVEXKOYBU-ZDUSSCGKSA-N	CHEMBL1185	ZOLMITRIPTAN	Others	Others	5-HT Receptor; Others; Others	5-HT1B/1D receptor	5-HT1B/1D	https://www.ncbi.nlm.nih.gov/pmc/articles/PMC4753983/	hsa04726	G protein-coupled receptor	5-HT	5-HT Receptor
M92242	A	5	50	10	DMSO	529-44-2	T0579	Myricetin	Cannabiscetin	Oc1cc(O)c2c(oc(c(O)c2=O)c2cc(O)c(O)c(O)c2)c1	C15H10O8	318.24	Apoptosis; Autophagy; Metabolism; PI3K/Akt/mTOR signaling	Apoptosis; Autophagy; Endogenous Metabolite; PI3K	Apoptosis; Autophagy; Endogenous Metabolite; PI3KÎ³	Myricetin is a naturally-occurring flavonoid found in many grapes, berries, fruits, vegetables, herbs, as well as other plants. Walnuts are a rich dietary source. It has been shown that myricetin has antioxidant properties.	Knekt P, et al. Am J Clin Nutr, 2002, 76(3), 560-568.	5281672	myricetin; 529-44-2; Cannabiscetin; Myricetol; Myricitin; 3,5,7-Trihydroxy-2-(3,4,5-trihydroxyphenyl)-4H-chromen-4-one; 3,3',4',5,5',7-Hexahydroxyflavone; 3,5,7,3',4',5'-Hexahydroxyflavone; delphidenolon 1575; 3,5,7-Trihydroxy-2-(3,4,5-trihydroxyphenyl)-4H-1-benzopyran-4-one; 3,5,7-trihydroxy-2-(3,4,5-trihydroxyphenyl)chromen-4-one; CCRIS 5838; NSC 407290; NSC-407290; 4H-1-Benzopyran-4-one, 3,5,7…	IKMDFBPHZNJCSN-UHFFFAOYSA-N	CHEMBL164	MYRICETIN	Others	Others	Apoptosis; Autophagy; Endogenous Metabolite; PI3K; Others; Others	PI3K (Phosphoinositide 3-kinases)	PI3K	Ruela-de-Sousa RR, Fuhler GM, Blom N, Ferreira CV, Aoyama H, Peppelenbosch MP. "Cytotoxicity of apigenin on leukemia cell lines: implications for prevention and therapy." Cell Death & Disease. 2010;1(1):e19. doi: 10.1038/cddis.2009.1. Note: This citation discusses flavonoids, of which myricetin is one, though the direct effect of myricetin on PI3K is reported in various studies observing its anti…	hsa04151 (PI3K-Akt signaling pathway)	Kinase	PI3K	Apoptosis
M92242	A	6	50	10	DMSO	77-36-1	T1091	Chlortalidone	Chlorthalidone	NS(=O)(=O)c1c(Cl)ccc(c1)C1(O)NC(=O)c2ccccc12	C14H11ClN2O4S	338.77	Others	Others	Na+/Ca2+ Exchanger	Chlorthalidone is a benzenesulfonamide-phthalimidine that tautomerizes to a BENZOPHENONES form. It is considered a thiazide-like diuretic.	Barrios V, et al. Which thiazide to choose as add-on therapy for hypertension? Integr Blood Press Control. 2014 Jul 30;7:35-47.	2732	chlorthalidone; 77-36-1; Chlortalidone; Phthalamudine; Chlorphthalidolone; Hygroton; Chlorthalidon; Phthalamodine; Natriuran; Thalitone; Chlorothalidone; Chlorphthalidone; Saluretin; Zambesil; Igroton; Isoren; Oradil; Renon; Hydro-Long; Chlortalidonum; Oxodolin; Clortalidone; Higroton; Famolin; Urolin; Oksodolin (oxodolin); Racemic chlorthalidone; 2-Chloro-5-(1-hydroxy-3-oxoisoindolin-1-yl)benzen…	JIVPVXMEBJLZRO-UHFFFAOYSA-N	CHEMBL1055	CHLORTHALIDONE	Others	Others	Others; Others; Others						Others	Others
M92242	A	7	50	10	DMSO	89-78-1	T2979	DL-Menthol	(Â±)-Menthol; Hexahydrothymol	O[C@H]1[C@H](C(C)C)CC[C@@H](C)C1	C10H20O	156.15	Membrane transporter/Ion channel; Neuroscience	AChE; GABA Receptor	cholinesterase; GABA Receptor	DL-Menthol is a racemic mixture of the monoterpene alcohols (â€“)-menthol and (+)-menthod, which have been found in Cannabis. (â€“)-Menthol is more common than (+)-menthol in nature and exhibits analgesic, antibacterial, and anticancer properties, as well as inhibits cholinesterase.2 (+)-Menthol inhibits the growth of F. verticillioides (MIC: 1.5 mM) but, unlike (â€“)-menthol, does not exhibit an…	Kamatou GP, et al. Menthol: a simple monoterpene with remarkable biological properties. Phytochemistry. 2013 Dec;96:15-25.	16666	l-Menthol; (-)-menthol; 2216-51-5; Levomenthol; Menthomenthol; l-(-)-Menthol; Menthacamphor; Peppermint camphor; (1R,2S,5R)-2-Isopropyl-5-methylcyclohexanol; U.S.P. Menthol; Levomentholum; Racementhol; (1r,2s,5r)-(-)-menthol; (-)-Menthyl alcohol; Menthol racemic; Hexahydrothymol; (1R)-(-)-Menthol; d,l-Menthol; (-)-(1R,3R,4S)-Menthol; (R)-(-)-Menthol; Menthol natural; 89-78-1; D-(-)-Menthol; Heada…	NOOLISFMXDJSKH-KXUCPTDWSA-N	CHEMBL470670	LEVOMENTHOL	Others	Others	AChE; GABA Receptor; Others; Others	TRPM8 (Transient Receptor Potential Cation Channel Subfamily M member 8)	TRPM8	https://pubmed.ncbi.nlm.nih.gov/14500710/ "Cooling relief of pain and itch via TRP channels: Mechanisms and potential therapies."	hsa04744	Ion channel	Transient_Receptor	AChE
M92242	A	7	50	10	DMSO	89-78-1	T2979	DL-Menthol	(Â±)-Menthol; Hexahydrothymol	O[C@H]1[C@H](C(C)C)CC[C@@H](C)C1	C10H20O	156.15	Membrane transporter/Ion channel; Neuroscience	AChE; GABA Receptor	cholinesterase; GABA Receptor	DL-Menthol is a racemic mixture of the monoterpene alcohols (â€“)-menthol and (+)-menthod, which have been found in Cannabis. (â€“)-Menthol is more common than (+)-menthol in nature and exhibits analgesic, antibacterial, and anticancer properties, as well as inhibits cholinesterase.2 (+)-Menthol inhibits the growth of F. verticillioides (MIC: 1.5 mM) but, unlike (â€“)-menthol, does not exhibit an…	Kamatou GP, et al. Menthol: a simple monoterpene with remarkable biological properties. Phytochemistry. 2013 Dec;96:15-25.	16666	l-Menthol; (-)-menthol; 2216-51-5; Levomenthol; Menthomenthol; l-(-)-Menthol; Menthacamphor; Peppermint camphor; (1R,2S,5R)-2-Isopropyl-5-methylcyclohexanol; U.S.P. Menthol; Levomentholum; Racementhol; (1r,2s,5r)-(-)-menthol; (-)-Menthyl alcohol; Menthol racemic; Hexahydrothymol; (1R)-(-)-Menthol; d,l-Menthol; (-)-(1R,3R,4S)-Menthol; (R)-(-)-Menthol; Menthol natural; 89-78-1; D-(-)-Menthol; Heada…	NOOLISFMXDJSKH-KXUCPTDWSA-N	CHEMBL470670	LEVOMENTHOL	Others	Others	AChE; GABA Receptor; Others; Others	Transient Receptor Potential Melastatin 8 (TRPM8)	TRPM8	McKemy, D.D., Neuhausser, W.M., and Julius, D. "Identification of a cold receptor reveals a general role for TRP channels in thermosensation." Nature 416, 52â€“58 (2002). https://doi.org/10.1038/nature719	hsa04750	Ion Channel	Transient_Receptor	AChE
M92242	A	8	50	10	DMSO	2398-96-1	T1094	Tolnaftate	NP-27; Tinactin; Tonoftal; Sporiline	c12c(cc(cc1)OC(=S)N(c1cc(ccc1)C)C)cccc2	C19H17NOS	307.42	GPCR/G Protein; Microbiology/virology; Stem Cells	Antifungal; Hedgehog/Smoothened	Fungal; Smoothened	Tolnaftate is a synthetic antifungal agent.	Barrett-Bee K, Dixon G. Acta Biochim Pol. 1995;42(4):465-79.	5510	tolnaftate; 2398-96-1; Tinactin; Tonoftal; Tolnaphthate; Sporiline; Tinaderm; Tolsanil; Aftate; Chinofungin; Dermoxin; Focusan; Tinavet; Pitrex; Naphthiomate T; Phytoderm; Timoped; Tritin; HI-Alazin; Fungistop; Tolnaftato; Tolnaftatum; Separin; Sorgoa; Sch 10144; O-2-Naphthyl m,N-dimethylthiocarbanilate; Dungistop; Tniaderm; Tolnaftato [DCIT]; Naphthiomate-T; Hi-alarzin; Tolnaftatum [INN-Latin]; …	FUSNMLFNXJSCDI-UHFFFAOYSA-N	CHEMBL83668	TOLNAFTATE	Others	Others	Antifungal; Hedgehog/Smoothened; Others; Others	squalene epoxidase		Ryder NS. "Mechanism of action and biochemical selectivity of allylamine antimycotic agents." Annals of the New York Academy of Sciences. 1988;544:208-20. DOI: 10.1111/j.1749-6632.1988.tb40445.x		enzyme	Squalene_epoxidase	Antifungal
M92242	A	9	50	10	DMSO	539-15-1	T2890	Hordenine		CN(C)CCc1ccc(cc1)O	C10H15NO	165.23	Microbiology/virology	Antibacterial; Antibiotic	antibiotic; Bacterial	Hordenine, an effective phenylethylamine alkaloid, has antibacterial activities.	Barwell CJ, et al. J Pharm Pharmacol, 1989, 41(6), 421-423.	68313	Hordenine; 539-15-1; 4-[2-(Dimethylamino)ethyl]phenol; Anhaline; N,N-Dimethyltyramine; 4-(2-(Dimethylamino)ethyl)phenol; Peyocactine; Cactine; 4-(2-Dimethylaminoethyl)phenol; Hordenin; Anhalin; Eremursine; Ordenina; p-Hydroxy-N,N-dimethylphenethylamine; Eremursin; Phenol, 4-[2-(dimethylamino)ethyl]-; Ordenine; p-(2-Dimethylaminoethyl)phenol; N,N-Dimethyl-p-hydroxyphenethylamine; Ordenina;Peyocact…	KUBCEEMXQZUPDQ-UHFFFAOYSA-N	CHEMBL505789	HORDENINE	Others	Others	Antibacterial; Antibiotic; Others; Others	Monoamine Oxidase	MAO	https://pubs.acs.org/doi/abs/10.1021/jf0497152 "Barwell, C. J., Basma, A. N., Lafi, M. A. K., & Leake, L. D. (1989). Deamination of hordenine by monoamine oxidase and its action on vasa deferentia of the rat. Journal of Pharmacy and Pharmacology, 41(6), 421-423."	hsa00260	Enzyme	MAO	Antibacterial
M92242	A	10	50	10	DMSO	124832-27-5	T1087	Valacyclovir hydrochloride	Valaciclovir hydrochloride; Valaciclovir HCl	Cl.CC(C)[C@H](N)C(=O)OCCOCn1cnc2c1nc(N)[nH]c2=O	C13H20N6O4Â·HCl	360.8	Cell Cycle/Checkpoint; DNA Damage/DNA Repair; Microbiology/virology	Antibiotic; DNA/RNA Synthesis; HSV	DNA polymerase; HSV; Antibiotic	Valacyclovir is an acyclovir prodrug that inhibits viral DNA replication after metabolization.	MacDougall C, et al. J Antimicrob Chemother,2004,3(6), 899-901.	135398741	Valacyclovir hydrochloride; 124832-27-5; Valacyclovir HCl; Valaciclovir hydrochloride; Valtrex; Valaciclovir Hcl; 256U87 hydrochloride; Valacyclovir (hydrochloride); BW-256U87; L-Valacyclovir Hydrochloride; CHEBI:9919; Valacyclovir hydrochloride [USAN]; NSC-759101; UNII-G447S0T1VC; G447S0T1VC; Valaciclovir (as hydrochloride); DTXSID2044210; 256-U-87 HYDROCHLORIDE; L-Valine, ester with 9-((2-hydro…	ZCDDBUOENGJMLV-QRPNPIFTSA-N	CHEMBL1201110	VALACYCLOVIR HYDROCHLORIDE	Others	Others	Antibiotic; DNA/RNA Synthesis; HSV; Others; Others	Herpes Simplex Virus DNA Polymerase	HSV	https://www.ncbi.nlm.nih.gov/pmc/articles/PMC2871171/	hsa05168	DNA Polymerase	HSV_DNA_Polymerase	Antibiotic
M92242	A	11	50	10	DMSO	501-94-0	T2861	Tyrosol	4-Hydroxyphenylethanol; 4-Hydroxyphenethyl alcohol; 2-(4-Hydroxyphenyl)ethanol	c1cc(ccc1CCO)O	C8H10O2	138.07	Metabolism; NF-ÎºB; oxidation-reduction	Antioxidant; Endogenous Metabolite; NF-ÎºB	Antioxidant; NF-ÎºB; Endogenous Metabolite	Tyrosol is a phenolic antioxidant that is naturally present in several foods such as wines and green tea and is present most abundantly in olives.	Chandramohan R, Pari L, Rathinam A, Sheikh BA. Chem Biol Interact. 2015 Mar 5;229:44-54.	10393	2-(4-Hydroxyphenyl)ethanol; Tyrosol; 501-94-0; 4-(2-Hydroxyethyl)phenol; 4-Hydroxyphenethyl alcohol; 4-Hydroxyphenylethanol; 4-Hydroxybenzeneethanol; p-Hydroxyphenethyl alcohol; Benzeneethanol, 4-hydroxy-; p-Tyrosol; 4-Hydroxyphenylethyl alcohol; Tyrosol C; 2-(4-Hydroxyphenyl)ethyl Alcohol; MFCD00002902; NSC 59876; p-Thyrosol; UNII-1AK4MU3SNX; 1AK4MU3SNX; EINECS 207-930-8; beta-(4-Hydroxyphenyl)e…	YCCILVSKPBXVIP-UHFFFAOYSA-N	CHEMBL53566	TYROSOL	Others	Others	Antioxidant; Endogenous Metabolite; NF-ÎºB; Others; Others	NF-ÎºB	NF-ÎºB	https://www.ncbi.nlm.nih.gov/pmc/articles/PMC6274514/	hsa04064	Transcription factor	NFkB	Antioxidant
M92242	A	12	50	10	DMSO	13614-98-7	T1101	Minocycline hydrochloride	Minocycline HCl	Cl.[C@@H]12[C@](C(=C3[C@H](C2)Cc2c(C3=O)c(ccc2N(C)C)O)O)(C(=O)C(=C([C@H]1N(C)C)O)C(=O)N)O	C23H28ClN3O7	493.94	Microbiology/virology	Antibacterial; Antibiotic	Antibiotic; Bacterial	Minocycline is a tetracycline antibiotic with excellent absorption and tissue penetration that is used for several bacterial infections as well as treatment of acne. Minocycline can cause both an acute hepatitis-like syndrome occurring within 1 to 3 months of starting therapy or a more insidious chronic hepatitis with autoimmune features typically after long-term treatment.	Brogden RN, et al. Drugs, 1975, 9(4), 251-291.	54685925	MINOCYCLINE HYDROCHLORIDE; 13614-98-7; Minocycline HCl; Arestin; Solodyn; Minomycin; Minocin; Klinomycin; Dynacin; Vectrin; Minocycline chloride; Minomax; Periocline; Ximino; Tri-mino; Minocycline (hydrochloride); Mynocine hydrochloride; Acnez; Minomycin chloride; Tri-minocycline; EINECS 237-099-7; (4S,4aS,5aR,12aS)-4,7-bis(dimethylamino)-3,10,12,12a-tetrahydroxy-1,11-dioxo-1,4,4a,5,5a,6,11,12a-o…	WTJXVDPDEQKTCV-VQAITOIOSA-N	CHEMBL4576719		Others	Others	Antibacterial; Antibiotic; Others; Others	30S ribosomal subunit		Chopra, I., & Roberts, M. (2001). Tetracycline antibiotics: mode of action, applications, molecular biology, and epidemiology of bacterial resistance. Microbiology and Molecular Biology Reviews, 65(2), 232-260. doi:10.1128/MMBR.65.2.232-260.2001	map03010	Antibiotic	Bacterial_Ribosome	Antibacterial
M92242	A	14	50	10	DMSO	84371-65-3	T1102	Mifepristone	RU 38486; RU486; C-1073	CC#C[C@]1(O)CC[C@H]2[C@@H]3CCC4=CC(=O)CCC4=C3[C@H](C[C@]12C)c1ccc(cc1)N(C)C	C29H35NO2	429.6	Autophagy; Endocrinology/Hormones; Immunology/Inflammation	Autophagy; Estrogen/progestogen Receptor; Glucocorticoid Receptor; NO Synthase; progesterone receptor	PR; Glucocorticoid Receptor; Progesterone Receptor; NO Synthase; Autophagy	Mifepristone is a Progestin Antagonist. The mechanism of action of mifepristone is as a Progestational Hormone Receptor Antagonist.	Jiang W, et al. Bioorg Med Chem, 2006, 14(19), 6726-6732.	55245	mifepristone; 84371-65-3; Mifegyne; Mifeprex; RU-486; Korlym; RU486; RU 486; Corlux; RU 38486; Mifepriston; Mifepristonum [Latin]; Mifepristona [Spanish]; RU-38486; Mifepristona; Mifepristonum; C29H35NO2; Mifepristone [USAN:INN:BAN]; HSDB 6841; R 38486; BRN 5779404; mifestone; UNII-320T6RNW1F; RU 486-6; MLS000069785; 320T6RNW1F; CCRIS 9332; VGX-410C; DTXSID5023322; CHEBI:50692; VGX-410; NSC-75986…	VKHAHZOOUSRJNA-GCNJZUOMSA-N	CHEMBL1276308	MIFEPRISTONE	Others	Others	Autophagy; Estrogen/progestogen Receptor; Glucocorticoid Receptor; NO Synthase; progesterone receptor; Others; Others	Glucocorticoid Receptor and Progesterone Receptor	GR (NR3C1), PR (PGR)	https://www.ncbi.nlm.nih.gov/pmc/articles/PMC1435228/	hsa04961 (for PR), hsa04927 (for Cortisol synthesis and secretion, relevant to GR)	Nuclear hormone receptor	Glucocorticoid_Receptor	Autophagy
M92242	A	15	50	10	DMSO	28697-53-2	T0588	D(-)-Arabinose		OC1[C@H]([C@@H]([C@@H](CO1)O)O)O	C5H10O5	150.13	Others	Others	Others	D-Arabinose is a reducing sugar useful as a substrate in analysis of arabinose isomerases and synthesis of D-erythroascorbic acid in yeast. ItÂ shows strong growth inhibition against the Caenorhabditis elegans with an IC50 of 7.5 mM.	Sakoguchi H, et al. Growth inhibitory effect of D-arabinose against the nematode Caenorhabditis elegans: Discovery of a novel bioactive monosaccharide. Bioorg Med Chem Lett. 2016 Feb 1;26(3):726-729.	6902	D-arabinopyranose; 28697-53-2; (3S,4R,5R)-Tetrahydro-2H-pyran-2,3,4,5-tetraol; d(-)-arabinose; (3S,4R,5R)-oxane-2,3,4,5-tetrol; Arabinose(D); D-?Arabinose; CHEBI:46994; MFCD00064361; 50986-18-0; Oxane-2,3,4,5-tetrol, (3S,4R,5R)-; D-(-)-Arabinose, 99%; SCHEMBL112598; CHEMBL1222249; D-(-)-Arabinose, >=98%; D-(-)-Arabinose, 98.5%; DTXSID101316251; 87-72-9; HY-N7082; s5134; AKOS016843688; CCG-266200;…	SRBFZHDQGSBBOR-ZRMNMSDTSA-N	CHEMBL1222249	D-ARABINOSE	Others	Others	Others; Others; Others						Others	Others
M92242	A	16	50	10	DMSO	125-84-8	T1103	Aminoglutethimide	BA-16038; NSC-330915; DL-Aminoglutethimide	CCC1(CCC(=O)NC1=O)c1ccc(N)cc1	C13H16N2O2	232.28	Endocrinology/Hormones	Aromatase	Aromatase	Aminoglutethimide, an aromatase inhibitor, is used in the therapy of advanced BREAST Y.	Neves MA, et al. Eur J Med Chem, 2009, 44(10), 4121-4127.	2145	aminoglutethimide; 125-84-8; dl-Aminoglutethimide; Cytadren; Orimeten; p-Aminoglutethimide; Elipten; 3-(4-aminophenyl)-3-ethylpiperidine-2,6-dione; 3-(4-Aminophenyl)-3-ethyl-2,6-piperidinedione; 2-(p-Aminophenyl)-2-ethylglutarimide; Aminoglutetimida; 2,6-Piperidinedione, 3-(4-aminophenyl)-3-ethyl-; Aminoglutethimidum; Ba-16038; 3-Ethyl-3-(p-aminophenyl)-2,6-dioxopiperidine; (+/-)-p-AMINOGLUTETHIM…	ROBVIMPUHSLWNV-UHFFFAOYSA-N	CHEMBL488	AMINOGLUTETHIMIDE	Others	Others	Aromatase; Others; Others	Aromatase	CYP19A1	https://www.ncbi.nlm.nih.gov/pmc/articles/PMC2014385/	hsa00140	enzyme	Aromatase	Aromatase
M92242	A	17	50	10	DMSO	1672-63-5	T2225	4-Hydroxyantipyrine		Cc1c(c(=O)n(n1C)c1ccccc1)O	C11H12N2O2	204.23	Immunology/Inflammation; Neuroscience	COX	COX-1; COX-2	4-Hydroxyantipyrine is formed during oxidative deamination of aminopyrine.	Brune K, Neubert A. Clin Exp Rheumatol. 2001 Nov-Dec;19(6 Suppl 25):S51-7.	98889	4-Hydroxyantipyrine; 1672-63-5; 4-hydroxy-1,5-dimethyl-2-phenylpyrazol-3-one; Antipyrine, 4-hydroxy; 4-Hydroxy-1,5-dimethyl-2-phenyl-1H-pyrazol-3(2H)-one; NSC 174055; DPZ41NV570; 4-Hydroxyphenazone; NSC 174055; NSC-174055; 3H-Pyrazol-3-one, 1,2-dihydro-4-hydroxy-1,5-dimethyl-2-phenyl-; Prestwick_270; 4-hydroxyphenazone; 4-Hydroxyantipyrene; 4-hydroxy Antipyrine; 4-hydroxy-1,5-dimethyl-2-phenyl-1,…	SKVPTPMWXJSBTF-UHFFFAOYSA-N	CHEMBL1526434		Others	Others	COX; Others; Others	COX	COX	https://www.ncbi.nlm.nih.gov/pmc/articles/PMC3191756/	hsa00590	Enzyme	COX	COX
M92242	A	18	50	10	DMSO	79794-75-5	T1097	Loratadine	Loratidine; SCH 29851	CCOC(=O)N1CC\C(CC1)=C1\c2ccc(Cl)cc2CCc2cccnc12	C22H23ClN2O2	382.88	GPCR/G Protein; Immunology/Inflammation; Microbiology/virology; Neuroscience	Histamine Receptor; Influenza Virus	B(0)AT2; Histamine Receptor; Influenza Virus	Loratadine is a second-generation histamine H1 receptor antagonist used in the treatment of allergic rhinitis and urticaria. Unlike most classical antihistamines (HISTAMINE H1 ANTAGONISTS) it lacks central nervous system depressing effects such as drowsiness.	Cuboni S, et al. J Med Chem, 2014, 57(22), 9473-9479.	3957	loratadine; 79794-75-5; Claritin; Alavert; Loratidine; Clarityn; Lisino; Clarityne; Loracert; Loradex; Bonalerg; Claritine; Fristamin; Histaloran; Lertamine; Lorastine; Loratyne; Civeran; Loranox; Versal; Aerotina; Alerpriv; Allertidin; Anhissen; Claratyne; Lorantis; Loritine; Lowadina; Polaratyne; Restamine; Sch 29851; Sensibit; Biloina; Lesidas; Loradif; Loraver; Lorfast; Nularef; Optimin; Sane…	JCCNYMKQOSZNPW-UHFFFAOYSA-N	CHEMBL998	LORATADINE	Others	Others	Histamine Receptor; Influenza Virus; Others; Others	Histamine H1 receptor	HRH1	https://pubchem.ncbi.nlm.nih.gov/compound/Loratadine#section=Pharmacology-and-Biochemistry	hsa04080	G protein-coupled receptor	Histamine_Receptor	Histamine Receptor
M92242	A	19	50	10	DMSO	63-74-1	T0123	Sulfanilamide	Sulphanilamide; UK-124	Nc1ccc(cc1)S(=O)(=O)N	C6H8N2O2S	172.2	Autophagy; Microbiology/virology	Antibacterial; Antibiotic; Autophagy	Bacterial; Antibiotic; DHPS	Sulfanilamide can competitively inhibit bacterial enzymeÂ dihydropteroate synthetaseÂ withÂ IC50Â of 320 Î¼M.	McCullough JL, et al. Antimicrob Agents Chemother, 1973, 3(6), 665-669.	5333	sulfanilamide; 4-Aminobenzenesulfonamide; 63-74-1; Sulphanilamide; Sulfamine; Sulfonamide; p-Aminobenzenesulfonamide; Sulphonamide; Sulfonylamide; Prontylin; p-Aminobenzenesulfamide; Prontosil Album; 4-Aminobenzene-1-Sulfonamide; Bacteramid; Streptasol; Streptocid; p-Sulfamoylaniline; Sulfonamide P; Prontosil I; Estreptocida; Exoseptoplix; Streptoclase; Sulfamidyl; Sulfanalone; Sulfanidyl; Sulfoc…	FDDDEECHVMSUSB-UHFFFAOYSA-N	CHEMBL21	SULFANILAMIDE	Others	Others	Antibacterial; Antibiotic; Autophagy; Others; Others	Dihydropteroate synthase	DHPS	Leski TA, et al. "The structure of dihydropteroate synthase from Staphylococcus aureus reveals a novel therapeutic target." Acta Crystallographica Section D, Biological Crystallography. 2004 Mar;60(Pt 3):429-37. Epub 2004 Feb 24.	map00790	enzyme	Dihydropteroate_Synthase	Antibacterial
M92242	A	20	50	10	DMSO	3734-33-6	T1098	Denatonium benzoate	THS-839	c1cccc(c1)C(=O)[O-].[N+](CC(=O)Nc1c(cccc1C)C)(CC)(CC)Cc1ccccc1	C28H34N2O3	446.58	Others	Others	Others	Denatonium, a quaternary ammonium cation, is a compound of a salt with an inert anion like saccharide or benzoate. Its structure is involved in the local anesthetic lidocaine which difference only is the addition of a benzyl group to the amino nitrogen.	Meyerhof W, et al. Chem Senses. 2010 Feb;35(2):157-70.	19518	DENATONIUM BENZOATE; 3734-33-6; Bitrex; Lidocaine benzyl benzoate; THS-839; Denatonium (benzoate); Aversion; Anispray; Gori; Denatonium benzoate anhydrous; Benzoato de denatonio; Benzoate de denatonium; Caswell No. 083BB; Lignocaine benzyl benzoate; Denatonii benzoas; WIN 16568; Denatonii benzoas [INN-Latin]; EINECS 223-095-2; UNII-M5BA6GAF1O; Benzoate de denatonium [INN-French]; Benzoato de dena…	VWTINHYPRWEBQY-UHFFFAOYSA-N	CHEMBL1371493	DENATONIUM BENZOATE	Others	Others	Others; Others; Others						Others	Others
M92242	A	21	50	10	DMSO	4961-41-5	T2229	Tetraethylenepentamine Pentahydrochloride		Cl.Cl.Cl.Cl.Cl.NCCNCCNCCNCCN	C8H23N5Â·5HCl	371.61	Others	Others	iron	Tetraethylenepentamine Pentahydrochloride is a high affinity copper and zinc chelator.	Wilfong WC, et al. ACS Appl Mater Interfaces. 2014 Aug 27;6(16):13617-26.	10309252	Tetraethylenepentamine pentahydrochloride; 4961-41-5; TETRAETHYLENEPENTAMINEPENTAHYDROCHLORIDE; Tetraethylenepentamine (pentahydrochloride); N'-[2-[2-(2-aminoethylamino)ethylamino]ethyl]ethane-1,2-diamine;pentahydrochloride; Tetraethylenepentamine 5HCl; CHEMBL4303631; DTXSID70437920; MFCD00083503; AKOS026750388; CCG-220665; BS-23864; PD055995; FT-0732803; Tetraethylenepentamine pentahydrochloride…	VGICAQBLDJAGSJ-UHFFFAOYSA-N	CHEMBL4303631		Others	Others	Others; Others; Others						Others	Others
M92242	A	22	50	10	DMSO	2901-75-9	T1106	Afalanine	N-Acetyl-DL-phenylalanine	CC(=O)NC(Cc1ccccc1)C(O)=O	C11H13NO3	207.23	Metabolism	Amino Acids and Derivatives	Amino Acids and Derivatives	N-Acetyl-DL-phenylalanine is a kind of Amino Acids and Derivatives.	Tsung PK, et al. Biochim Biophys Acta. 1976 Aug 12;445(1):112-7.	2000	N-Acetyl-DL-phenylalanine; 2901-75-9; Afalanine; N-Acetylphenylalanine; Ac-DL-Phe-OH; 2-acetamido-3-phenylpropanoic acid; N-Acetyl-D,L-phenylalanine; 2901-61-3; Afalanine [INN]; Afalanina; Afalaninum; DL-N-Acetyl-3-phenylalanine; DL-Phenylalanine, N-acetyl-; N-Acetyl-3-phenyl-DL-alanine; acetylphenylalanine; DL-2-Acetamido-3-phenylpropionic acid; Afalaninum [INN-Latin]; Afalanina [INN-Spanish]; A…	CBQJSKKFNMDLON-UHFFFAOYSA-N	CHEMBL134570	AFALANINE	Others	Others	Amino Acids and Derivatives; Others; Others						Amino_Acids_and_Derivatives	Amino Acids and Derivatives
M92242	B	3	50	10	DMSO	4093-35-0	T1175	Bromopride	Bromoprida; Valopride; Artomey	CCN(CC)CCNC(=O)c1cc(Br)c(N)cc1OC	C14H22BrN3O2	344.25	GPCR/G Protein; Neuroscience	Dopamine Receptor	Dopamine; Dopamine Receptor	Bromopride is a dopamine antagonist with prokinetic properties closely related to metoclopramide, and is widely used as an antiemetic. It is not available in the United States or the United Kingdom.	Tonini M, et al. Aliment Pharmacol Ther. 2004 Feb 15;19(4):379-90.	2446	bromopride; 4093-35-0; Artomey; Valopride; Bromoprida; Emepride; Viaben; Bromoprida [Spanish]; C14H22BrN3O2; Bromopridum; Movipride; 4-Amino-5-bromo-N-(2-(diethylamino)ethyl)-o-anisamide; Bromopride [INN:DCF]; Bromopridum [INN-Latin]; 4-Amino-5-bromo-N-[2-(diethylamino)ethyl]-2-methoxybenzamide; Bromoprida [INN-Spanish]; VAL 13081; EINECS 223-842-2; NSC-758391; BRN 2381893; UNII-75473V2YZK; N-(Di…	GIYAQDDTCWHPPL-UHFFFAOYSA-N	CHEMBL399510	BROMOPRIDE	Others	Others	Dopamine Receptor; Others; Others	Dopamine Receptor	DRD	https://www.ncbi.nlm.nih.gov/pmc/articles/PMC6494022/	hsa04080	G protein-coupled receptor	Dopamine	Dopamine Receptor
M92242	B	4	50	10	DMSO	4460-86-0	T2826	Asarylaldehyde	2,4,5-trimethoxy-Benzaldehyde; Asaraldehyde; Asaronaldehyde	COc1cc(c(cc1C=O)OC)OC	C10H12O4	196.2	Immunology/Inflammation; Neuroscience	COX	COX; COX-2	Asaraldehyde, a natural COX-2 inhibitor, exhibits 17-fold selectivity than COX-1.	Chen CC et al. Lett Appl Microbiol, 2007, 44(4), 387-392.	20525	2,4,5-TRIMETHOXYBENZALDEHYDE; 4460-86-0; Asaraldehyde; Asaronaldehyde; Asarylaldehyde; Azarylaldehyde; Gazarin; 3,4,6-Trimethoxybenzaldehyde; Benzaldehyde, 2,4,5-trimethoxy-; 14374-62-0; NSC 89299; 2,4,5-trimethoxy-benzaldehyde; NCI-C61632; MFCD00003312; CCRIS 1296; HSDB 4502; EINECS 224-713-3; UNII-NDU8J2Q00D; BRN 1951403; NDU8J2Q00D; 2,4,5-trimethoxylbenzaldehyde; AI3-36671; 2,4,5-Trimethoxy be…	IAJBQAYHSQIQRE-UHFFFAOYSA-N	CHEMBL1164301	ASARALDEHYDE	Others	Others	COX; Others; Others						COX	COX
M92242	B	5	50	10	DMSO	119413-54-6	T1174	Topotecan hydrochloride	NSC 609669; SKF 104864A; Topotecan HCl; NSC609699; Nogitecan HCl; SKFS 104864A	Cl.CC[C@@]1(O)C(=O)OCc2c1cc1-c3nc4ccc(O)c(CN(C)C)c4cc3Cn1c2=O	C23H24ClN3O5	457.92	Apoptosis; Autophagy; DNA Damage/DNA Repair	Apoptosis; Autophagy; Topoisomerase	Topo I (DU-145 Luc cells); Topo I (MCF-7 Luc cells); Topoisomerase; Autophagy; Apoptosis	Topotecan hydrochloride is an antineoplastic agent used to treat ovarian cancer.	Caceres G, et al. Anticancer Drugs. 2003, 14(7), 569-574.	60699	TOPOTECAN HYDROCHLORIDE; 119413-54-6; Topotecan Hcl; Hycamtin; Nogitecan hydrochloride; Topotecan (Hydrochloride); Topotecan monohydrochloride; SK&F S-104864-A; Evotopin; Topotecan hydrochloride [USAN]; NSC 609699; Topotecan teva; Hycamptamine hydrochloride; Topotecan Hospira; Topotecan Actavis; DRG-0288; NSC609699; SKF 104864A; NSC-759263; Topotecan (as hydrochloride); UNII-956S425ZCY; (S)-10-((…	DGHHQBMTXTWTJV-BQAIUKQQSA-N	CHEMBL1607	TOPOTECAN HYDROCHLORIDE	Others	Others	Apoptosis; Autophagy; Topoisomerase; Others; Others	Topoisomerase I	TOP1	https://pubchem.ncbi.nlm.nih.gov/compound/Topotecan-hydrochloride#section=Biological-Test-Results	hsa03030	enzyme	Topoisomerase	Apoptosis
M92242	B	6	50	10	DMSO	2555-28-4	T2785	7-Methoxy-4-methylcoumarin		Cc1cc(=O)oc2c1ccc(c2)OC	C11H10O3	190.2	Microbiology/virology	Antibacterial	Bacterial	7-Methoxy-4-methylcoumarin is a coumarin derivative and fluorescent label, it displays good activity against B. subtilis.	Chattha F A , Munawar M A , Nisa M , et al. Potential antibacterial activity of coumarin and coumarin-3-acetic acid derivatives[J]. Pakistan journal of pharmaceutical sciences, 2015, 28(3):819-823.	390807	7-Methoxy-4-methylcoumarin; 2555-28-4; 7-Methoxy-4-methyl-2H-chromen-2-one; 4-Methylherniarin; HYMECROMONE METHYL ETHER; 2H-1-Benzopyran-2-one, 7-methoxy-4-methyl-; 7-methoxy-4-methylchromen-2-one; 7-Methoxy-4-methyl-chromen-2-one; 4-Methyl-7-methoxycoumarin; 39JDG776HP; 7-Methoxy-4-methyl-2H-1-benzopyran-2-one; MFCD00009773; NSC688805; NSC 688805; UNII-39JDG776HP; Methyl 4-methylumbelliferyl eth…	UDFPKNSWSYBIHO-UHFFFAOYSA-N	CHEMBL12636	HYMECROMONE METHYL ETHER	Others	Others	Antibacterial; Others; Others						Antibacterial	Antibacterial
M92242	B	7	50	10	DMSO	427-51-0	T1167	Cyproterone acetate	Androcur; Cyproterone 17-O-acetate	[C@]12([C@@H]3[C@@H](C3)C(=O)C=C2C(=C[C@@H]2[C@@H]1CC[C@]1([C@H]2CC[C@]1(OC(=O)C)C(=O)C)C)Cl)C	C24H29ClO4	416.94	Endocrinology/Hormones	Androgen Receptor	Androgen Receptor	Cyproterone binds the androgen receptor (AR), thereby preventing androgen-induced receptor activation in target tissues and inhibiting the growth of testosterone-sensitive tumor cells. Cyproterone Acetate is the acetate salt of a synthetic steroidal antiandrogen with weak progestational and antineoplastic activities. This agent also exerts progestational agonist properties at the level of the pit…	Sonneveld E, et al. Toxicol Sci. 2005, 83(1), 136-148.	9880	CYPROTERONE ACETATE; 427-51-0; Androcur; Cyproterone 17-O-acetate; Cyproteroneacetate; Cyproteron acetate; Cyproteron-R acetate; Cyprostat; NSC-81430; SH 714; Cyprosterone acetate; Cyproterone 17alpha-acetate; SH-714; SH 80714; C24H29ClO4; CCRIS 4385; Cyproterone acetate [USAN:JAN]; HSDB 3592; EINECS 207-048-3; UNII-4KM2BN5JHF; NSC 81430; 4KM2BN5JHF; cyproviron; Cyproterone 17.alpha.-acetate; MLS…	UWFYSQMTEOIJJG-FDTZYFLXSA-N	CHEMBL139835	CYPROTERONE ACETATE	Others	Others	Androgen Receptor; Others; Others	Androgen Receptor	AR	https://pubchem.ncbi.nlm.nih.gov/compound/Cyproterone-acetate#section=Pharmacology-and-Biochemistry	hsa05200	Receptor	Androgen_Receptor	Androgen Receptor
M92242	B	8	50	10	DMSO	1552-94-9	T3006	Cinnamylideneacetic acid	5-Phenyl-2,4-pentadienoic acid; 5-Phenylpenta-2,4-dienoic acid; Beta-Styrylacrylic acid	c1ccc(cc1)/C=C/C=C/C(=O)O	C11H10O2	174.2	Microbiology/virology	Antibacterial	Bacterial	5-Phenyl-2,4-pentadienoic acid is used as Synthetic building block, anti-malarial agent.	Werbel LM, et al. J Med Chem. 1968 Sep;11(5):1073-4.	1549512	5-Phenylpenta-2,4-dienoic acid; 1552-94-9; (2E,4E)-5-phenylpenta-2,4-dienoic acid; 5-Phenyl-2,4-pentadienoic acid; 28010-12-0; cinnamylideneacetic acid; JUAREZIC ACID; 2,4-Pentadienoic acid, 5-phenyl-; beta-Styrylacrylic acid; 2,4-Pentadienoicacid, 5-phenyl-, (2E,4E)-; Cinnamalacetic acid; (E,E)-cinnamylideneacetic acid; NSC 1778; EINECS 216-298-2; NSC 63972; NSC 109408; (4E)-5-phenylpenta-2,4-di…	FEIQOMCWGDNMHM-KBXRYBNXSA-N	CHEMBL1095566	JUAREZIC ACID	Others	Others	Antibacterial; Others; Others						Antibacterial	Antibacterial
M92242	B	9	50	10	DMSO	85622-93-1	T1178	Temozolomide	CCRG 81045; TMZ; NSC 362856; TZM	Cn1nnc2c(ncn2c1=O)C(N)=O	C6H6N6O2	194.15	Apoptosis; Autophagy; Cell Cycle/Checkpoint; DNA Damage/DNA Repair	Apoptosis; Autophagy; DNA Alkylator/Crosslinker; DNA/RNA Synthesis	DNA Alkylator/Crosslinker; Autophagy; Apoptosis; DNA replication	Temozolomide is a DNA alkylating agent interfering with DNA replication.	Marchesi F, et al. Triazene compounds: mechanism of action and related DNA repair systems. Pharmacol Res. 2007 Oct;56(4):275-87.	5394	temozolomide; 85622-93-1; Methazolastone; Temodar; Temodal; Temozolamide; 3-methyl-4-oxo-3,4-dihydroimidazo[5,1-d][1,2,3,5]tetrazine-8-carboxamide; Sch 52365; CCRG-81045; Temozolomidum [Latin]; Temozolodida [Spanish]; Temozolomidum; CCRG 81045; NSC 362856; Sch-52365; Temozolodida; M&B 39831; M&B-39831; NSC-362856; temomedac; C6H6N6O2; CCRIS 8996; MB 39831; Temozolomide [INN:BAN]; 8-Carbamoyl-3-me…	BPEGJWRSRHCHSN-UHFFFAOYSA-N	CHEMBL810	TEMOZOLOMIDE	Others	Others	Apoptosis; Autophagy; DNA Alkylator/Crosslinker; DNA/RNA Synthesis; Others; Others	O^6-methylguanine-DNA methyltransferase	MGMT	https://www.ncbi.nlm.nih.gov/pmc/articles/PMC2633414/	hsa00240 (Pyrimidine metabolism)	DNA repair enzyme	DNA/RNA_Associated	Apoptosis
[truncated: 8,083 more rows]

## Sheet: Supp.Figure 1
Supp.Fig1 Source Data
Colinearity feature reduced CP Scores (used for all figures in Supp.Fig1)
PMA
noPMA
